# Supplementary material for: A survey of RNA editing at single-cell resolution links interneurons to schizophrenia and autism
Source: RNA. 2021 Dec;27(12):1482–96. doi: 10.1261/rna.078804.121 (PMC8594476; doi:10.1261/rna.078804.121)
Supplement: Supplemental Material [file supp_078804.121_Supplementary_Tables.xlsx]

## Sheet: Table_description
Table S1	Lake et al Science 2016 metadata for neuronal nuclei from an individual female post-mortem brain donor, passing quality control for this study.
Table S2	Darmanis et al PNAS 2016 metadata for neuronal nuclei from four adult donors.
Table S3	Annotation of 41,930 unique RNA editing sites detected in Lake et al neuronal nuclei. Ensembl feature and repeat annotation; genic context, predicted RNA structural effects and detection in related studies. Note this table is redundant on site ID due to reporting of multiple overlapping Ensembl features for a subset of sites.
Table S4	Potential consequences of RNA editing-induced amino acid substitutions in Lake et al neuronal nuclei. Data displayed in Figure S5c.
Table S5	Global editing index, N. edited sites detected and endogenous library size per neuronal nucleus .
Table S6	Summary statistics for site-level and gene-level differential editing between excitatory and inhibitory neuronal subtypes. Data displayed in Figure 4.
Table S7	Summary statistics for site-level and gene-level differential editing between each Brodmann area (cortical region) and the group average.
Table S8	Summary statistics for gene abundance vs global RNA editing associations (Figure 5a).
Table S9	Editing status of genes evidenced to interact with snoRNAs.

## Sheet: Colname_description
Table	Column name	Description
TableS3	Site_ID	RNA editing site chromosome_position
	chromosome	Editing site chromosome
	position	Editing site position (NT)
	base_change	ReferenceAllele_AlternativeAllele
	strand	Genomic DNA strand on which edited RNA is encoded
	strand_overlap	Cognate: edited site within single or overlapping ('multi') Ensembl features on cognate genomic strand e.g. A>G on plus strand. no_ENSG: site in transcript not bounded by annotated ensembl gene. mix: site detected in RNA transcribed from genomic region containing overlapping genes on opposite DNA strands
	ENSMBL_GeneID	-
	gene_name	-
	gene_biotype	-
	gene_description	-
	REDIportal_context	Alu, non-repetitive (NONREP) or non-Alu repetitive (REP) genomic context in the REDIportal as assigned by Picardi et al NAR 2017.
	RepeatMasker_ID	Region flanking edited site annotated in the UCSC repeat masker track
	REDIportal_RepeatMasker_intersect	Working annotation for site genomic context derived for sites not catalogued in REDIportal, based on the RepeatMasker annotation
	Genic_feature_summary	Genic feature context for sites in coding genes. Multi indicates site overlapped by different features annotated in multiple genes or isoforms.
	n_Cells_ed_Lake_etal	N. neuronal nuclei in which editing site alternate (i.e., edited) allele is detected in Lake et al data
	n_Cells_transcr_Lake_etal	N. neuronal nuclei in which candidate editing site reference or alternate allele is detected in Lake et al data
	mean_edPropn_Lake_etal	Mean (n alternate counts / (n alternate + n reference counts)) across cells
	dEd_ASD_Tran_etal	Differential editing status in bulk RNAseq libraries from brain donors with autism spectrum disorder; Tran et al Nature Neuroscience 2019
	dEd_Schizophrenia_Breen_etal	Differential editing status in bulk RNAseq libraries from brain donors with schizophrenia; Breen et al Nature Neuroscience 2019
	nCells_Darmanis_etal	N. neuronal nuclei in in which edited site is detected in Darmanis et al PNAS 2016 data
	nDonors_Darmanis_etal	N. tissue donors in which edited site is detected in Darmanis et al PNAS 2016 data
	REDIportal	Binary tag indicating that site is detected (1) or undetected (0) in at least one tissue library in REDIportal
	REDI_All_Brain	Binary tag indicating that site is detected (1) or undetected (0) in at least one bulk brain RNAseq library available in REDIportal
	REDI_All_Brain_gte3	Binary tag indicating that site is detected (1) or undetected (0) in at least three bulk brain RNAseq library available in REDIportal
	REDI_BA9	Binary tag indicating that site is detected (1) or undetected (0) in at least one bulk brain RNAseq library from Brodmann Area 9 (frontal cortex) available in REDIportal
	REDI_BA9_gte3	Binary tag indicating that site is detected (1) or undetected (0) in at least three bulk brain RNAseq libraries from Brodmann Area 9 (frontal cortex) available in REDIportal
	RNAsnp_p_value	P value for test of local RNA secondary structure perturbation for 35k of 41k unique sites, calculated via RNAsnp (Sabarinathan et al Human Mutation 2013)
Table S4	Site_ID	RNA editing site chromosome_position
	gene_name	-
	REDIportal_context	Alu, non-repetitive (NONREP) or non-Alu repetitive (REP) genomic context in the REDIportal as assigned by Picardi et al NAR 2017.
	Consequence_VEP	Predicted consequence of editing-induced variation on gene functional from the Variant Effect Predictor
	Amino_acids_VEP	Possible RNA editing-induced protein amino acid substitutions
	uniP_domain_Start	UniProt domain start position in protein primary sequence
	uniP_domain_End	UniProt domain end position in protein primary sequence
	uniP_entry	Uniprot domain code. Note more than one overlapping domain may be predicted esp. from different isoforms. These are separated via ';'
	evidence	Uniprot domain evidence code as per https://www.uniprot.org/help/evidences
	domain_length	Uniprot domain length in amino acids
	UniProt_domain	Uniprot domain name(s)
	Nishikura_2016_protein	Description of protein reviewed in Nishikura et al Nat Rev Mol Cell Biol 2016
	ADARmember	ADAR enzyme acting on edited RNA site reviewed in Nishikura et al Nat Rev Mol Cell Biol 2016
	Function	Effect of edited site on protein function as reviewed in Nishikura et al Nat Rev Mol Cell Biol 2016
Table S5	Cell_id	Lake et al neuronal nucleus RNA library ID (SRA 'Run')
	Neuronal_subtype	Gross neuronal subtype (excitatory or inhibitory) defined by Lake et al
	Group_ID_Lake_etal	Neuronal subgroup defined by Lake et al
	Brodmann_area	Brodmann cortical area of neuronal origin
	GEI	Global editing index calculated across the subset of 41,930 candidate editing sites that are transcribed in the neuronal nucleus
	n_edSites_in_cell	N. of the 41,930 candidate RNA editing sites that are edited in the neuronal nucleus. This excludes candidate sites that are transcribed but not edited
	counts_library_size_endogenous	N. endogenous genomic read counts quantified in neuronal nucleus
Table S6	Site_ID	As above
	gene_name	-
	mean_logFC_gene	Mean of log fold change for edited sites across gene body in excitatory vs inhibitory neurons
	PValue_gene	P value for enrichment/depletion of editing sites across gene calculated using limma::fry()
	FDR_gene	Corrected p value for gene editing enrichment/depletion
	logFC_site	Log fold change in editing for individual site
	logCPM_site	Log counts per million (library size-normalized read count abundance) over edited site
	LR_site	Log ratio of site editing in exitatory vs inhibitory neurons
	PValue_site	P value for differential site editing
	FDR_site	Corrected p value for differential site editing
	Class	Annotation of differential gene-level editing result
	site_oLap_SCZ_Breen_etal	Tag indicating that site is differentially edited in brain bulk RNA libraries from subjects with schizophrenia (Breen et al Nat Neuro 2019)
	site_oLap_ASD_Tran_etal	Tag indicating that site is differentially edited in brain bulk RNA libraries from subjects with autism spectrum disorder (Tran et al Nat Neuro 2019)
Table S7	Site_ID	As above
	gene_name	-
	PValue_gene	P value for enrichment/depletion of editing sites across gene calculated using limma::fry()
	FDR_gene	Corrected p value for gene editing enrichment/depletion
	NSites_ed	N. individual edited sites tested in gene enrichment
	NSites_sig_dEd	N. individually significant differentially edited sites within gene
	logFC_site	Log fold change in editing for individual site
	LR_site	Log ratio of site editing in Brodmann area of interest compared to mean of remaining areas
	PValue_site	P value for differential site editing
	FDR_site	Corrected p value for differential site editing
	Brodmann_area	Cortical region of interest tested against remaining regions
Table S8	Ensembl_gene_ID	-
	Gene_abundance_association_with_GEI	Estimate (beta coefficient) for relationship between gene abundance (x) and transcriptome-wide editing (y) across nuclei
	std_error	Standard error for relationship between gene abundance (x) and transcriptome-wide editing (y) across nuclei
	t_statistic	T statistic for relationship between gene abundance (x) and transcriptome-wide editing (y) across nuclei
	p_value	P value for relationship between gene abundance (x) and transcriptome-wide editing (y) across nuclei
	gene_name	-
	gene_biotype	-
	description	Gene description
	FDR	Corrected p value
Table S9	gene_name	-
	n_Cells_gene_detected	N nuclei in which snord-associated gene was detected
	mean_MAF_G	Mean (n alternate counts / (n alternate + n reference counts)) for gene calcualted across cells
	interacting_snoRNA	Name of small nucleolar RNA evidenced to interact with gene
	Publication_author	Publication linking snoRNA and protein-coding gene

## Sheet: Table S1
Sample_Name	SCAP_T_SAMPLE_ID	C1_Run_ID	Group_ID	Sub_Group_ID	C1_Protocol	C1_Chip	Nuclei_Prep	Biopsy_ID	SRA	Neuronal_type	Brodmann_Area
20131219_1C50	SC_UCSD_340	20131219	In1	In1BA8	Smart	Medium	None	1568-BA8-sec7	SRR1764224	In	BA8
20131219_1C92	SC_UCSD_140	20131219	In1	In1BA8	Smart	Medium	None	1568-BA8-sec7	SRR1764038	In	BA8
20140123_1C82_S168	SC_UCSD_347	20140123	In1	In1BA8	Smart+	Medium	None	1568-BA8-sec7	SRR1764230	In	BA8
20140123_1C90_S178	SC_UCSD_90	20140123	In1	In1BA8	Smart+	Medium	None	1568-BA8-sec7	SRR1763990	In	BA8
20140205_1C39_S75	SC_UCSD_118	20140205	In1	In1BA8	Smart	Medium	None	1568-BA8-sec9	SRR1764016	In	BA8
20140212_1C45_S87	SC_UCSD_231	20140212	In1	In1BA8	Smart+	Medium	None	1568-BA8-sec9	SRR1764124	In	BA8
20140212_1C91_S90	SC_UCSD_480	20140212	In1	In1BA8	Smart+	Medium	None	1568-BA8-sec9	SRR1764351	In	BA8
20140213_1C28_S55	SC_UCSD_440	20140213	In1	In1BA8	Smart+	Medium	None	1568-BA8-sec7	SRR1764315	In	BA8
20140213_1C93_S88	SC_UCSD_67	20140213	In1	In1BA8	Smart+	Medium	None	1568-BA8-sec7	SRR1763968	In	BA8
20140218_1C68	SC_UCSD_234	20140218	In1	In1BA8	Smart+	Medium	None	1568-BA8-sec7	SRR1764127	In	BA8
20140218_1C78	SC_UCSD_24	20140218	In1	In1BA8	Smart+	Medium	None	1568-BA8-sec7	SRR1763930	In	BA8
20140220_1C83	SC_UCSD_198	20140220	In1	In1BA8	Smart+	Medium	None	1568-BA8-sec9	SRR1764092	In	BA8
20140220_1C87	SC_UCSD_172	20140220	In1	In1BA8	Smart+	Medium	None	1568-BA8-sec9	SRR1764068	In	BA8
20140227_1C41_S80	SC_UCSD_452	20140227	In1	In1BA8	Smart+	Medium	None	1568-BA8-sec9	SRR1764327	In	BA8
20140227_1C65_S35	SC_UCSD_87	20140227	In1	In1BA8	Smart+	Medium	None	1568-BA8-sec9	SRR1763988	In	BA8
20140304_1C06_S6	SC_UCSD_743	20140304	In1	In1BA8	Smart+	Small	None	1568-BA8-sec9	SRR2137257	In	BA8
20140304_1C66_S16	SC_UCSD_837	20140304	In1	In1BA8	Smart+	Small	None	1568-BA8-sec9	SRR2137351	In	BA8
20140311_1C02_S2	SC_UCSD_920	20140311	In1	In1BA8	Smart+	Medium	None	1568-BA8-sec9	SRR2137434	In	BA8
20140311_1C90_S82	SC_UCSD_799	20140311	In1	In1BA8	Smart+	Medium	None	1568-BA8-sec9	SRR2137313	In	BA8
20140313_1C84_S70	SC_UCSD_610	20140313	In1	In1BA8	Smart+	Medium	None	1568-BA8-sec9	SRR2137124	In	BA8
20140317_1C03_S1	SC_UCSD_706	20140317	In1	In1BA8	Smart+	Medium	Frozen DMSO	1568-BA8-sec9	SRR2137220	In	BA8
20140317_1C05_S8	SC_UCSD_1022	20140317	In1	In1BA8	Smart+	Medium	Frozen DMSO	1568-BA8-sec9	SRR2137536	In	BA8
20140317_1C53_S11	SC_UCSD_857	20140317	In1	In1BA8	Smart+	Medium	Frozen DMSO	1568-BA8-sec9	SRR2137371	In	BA8
20140317_1C87_S76	SC_UCSD_846	20140317	In1	In1BA8	Smart+	Medium	Frozen DMSO	1568-BA8-sec9	SRR2137360	In	BA8
20140320_1C16_S33	SC_UCSD_790	20140320	In1	In1BA8	Smart+	Medium	None	1568-BA8-sec9	SRR2137304	In	BA8
20140320_1C19_S39	SC_UCSD_966	20140320	In1	In1BA8	Smart+	Medium	None	1568-BA8-sec9	SRR2137480	In	BA8
20140321_1C15_S25	SC_UCSD_673	20140321	In1	In1BA8	Smart+	Medium	Frozen Glycerol	1568-BA8-sec9	SRR2137187	In	BA8
20140321_1C16_S33	SC_UCSD_623	20140321	In1	In1BA8	Smart+	Medium	Frozen Glycerol	1568-BA8-sec9	SRR2137137	In	BA8
20140321_1C33_S63	SC_UCSD_859	20140321	In1	In1BA8	Smart+	Medium	Frozen Glycerol	1568-BA8-sec9	SRR2137373	In	BA8
20140321_1C38_S74	SC_UCSD_1075	20140321	In1	In1BA8	Smart+	Medium	Frozen Glycerol	1568-BA8-sec9	SRR2137589	In	BA8
20140326_1C28_S37	SC_UCSD_969	20140326	In1	In1BA8	Smart+	Medium	Frozen DMSO	1568-BA8-sec9	SRR2137483	In	BA8
20140331_1C41_S58	SC_UCSD_740	20140331	In1	In1BA8	Smart+	Small	Frozen DMSO	1568-BA8-sec9	SRR2137254	In	BA8
20140331_1C58_S42	SC_UCSD_1082	20140331	In1	In1BA8	Smart+	Small	Frozen DMSO	1568-BA8-sec9	SRR2137596	In	BA8
20140402_1C38_S73	SC_UCSD_936	20140402	In1	In1BA8	Smart+Poly	Small	Frozen DMSO	1568-BA8-sec9	SRR2137450	In	BA8
20140415_1C81_S128	SC_UCSD_1154	20140415	In1	In1BA21	Smart+	Small	None	1568-BA21-sec15	SRR3230193	In	BA21
20140422_1C47_S32	SC_UCSD_2700	20140422	In1	In1BA22	Smart+	Small	None	1568-BA22-sec15	SRR5899874	In	BA22
20140424_1C26_S54	SC_UCSD_2316	20140424	In1	In1BA41	Smart+	Small	None	1568-BA41/BA42-sec17	SRR5899490	In	BA41
20140605_1C31_S91	SC_UCSD_1249	20140605	In1	In1BA22	Smart+	Small	Frozen DMSO	1568-BA22-sec15	SRR3230288	In	BA22
20140715_1C79_S60	SC_UCSD_1269	20140715	In1	In1BA21	Smart+	Small	Frozen DMSO	1568-BA21-sec15	SRR3230308	In	BA21
20140715_1C86_S55	SC_UCSD_1262	20140715	In1	In1BA21	Smart+	Small	Frozen DMSO	1568-BA21-sec15	SRR3230301	In	BA21
20140716_1C46_S36	SC_UCSD_1311	20140716	In1	In1BA21	Smart+	Small	Frozen DMSO	1568-BA21-sec15	SRR3230350	In	BA21
20140722_1C43_S72	SC_UCSD_1375	20140722	In1	In1BA21	Smart+	Small	Frozen DMSO	1568-BA21-sec15	SRR3230414	In	BA21
20140722_1C67_S84	SC_UCSD_1371	20140722	In1	In1BA21	Smart+	Small	Frozen DMSO	1568-BA21-sec15	SRR3230410	In	BA21
20140723_1C56_S87	SC_UCSD_1418	20140723	In1	In1BA21	Smart+	Small	Frozen DMSO	1568-BA21-sec15	SRR3230457	In	BA21
20140723_1C64_S67	SC_UCSD_1434	20140723	In1	In1BA21	Smart+	Small	Frozen DMSO	1568-BA21-sec15	SRR3230473	In	BA21
20140723_1C73_S88	SC_UCSD_1402	20140723	In1	In1BA21	Smart+	Small	Frozen DMSO	1568-BA21-sec15	SRR3230441	In	BA21
20140724_1C66_S4	SC_UCSD_1471	20140724	In1	In1BA21	Smart+	Small	Frozen DMSO	1568-BA21-sec15	SRR3230510	In	BA21
20140815A_1C10_S20	SC_UCSD_1584	20140815A	In1	In1BA21	Smart+	Small	Frozen DMSO	1568-BA21-sec15	SRR3230623	In	BA21
20140815B_1C82_S71	SC_UCSD_1622	20140815B	In1	In1BA21	Smart+	Small	Frozen DMSO	1568-BA21-sec15	SRR3230661	In	BA21
20140819_1C72_S10	SC_UCSD_1495	20140819	In1	In1BA41	Smart+	Small	Frozen DMSO	1568-BA41/BA42-sec17	SRR3230534	In	BA41
20140819_1C89_S81	SC_UCSD_1508	20140819	In1	In1BA41	Smart+	Small	Frozen DMSO	1568-BA41/BA42-sec17	SRR3230547	In	BA41
20140909A_1C15_S25	SC_UCSD_3924	20140909A	In1	In1BA22	Smart+	Small	Frozen DMSO	1568-BA22-sec15	SRR5897245	In	BA22
20140909A_1C79_S88	SC_UCSD_1754	20140909A	In1	In1BA22	Smart+	Small	Frozen DMSO	1568-BA22-sec15	SRR3230793	In	BA22
20140909B_1C40_S90	SC_UCSD_1769	20140909B	In1	In1BA41	Smart+	Small	None	1568-BA41/BA42-sec17	SRR3230808	In	BA41
20140930A_1C63_S58	SC_UCSD_1785	20140930A	In1	In1BA10	Smart+Poly	Small	None	1568-BA10-sec1	SRR3230823	In	BA10
20140930B_1C44_S15	SC_UCSD_1826	20140930B	In1	In1BA10	Smart+Poly	Small	Frozen DMSO	1568-BA10-sec1	SRR3230864	In	BA10
20140930B_1C73_S17	SC_UCSD_1840	20140930B	In1	In1BA10	Smart+Poly	Small	Frozen DMSO	1568-BA10-sec1	SRR3230878	In	BA10
20141002A_1C77_S84	SC_UCSD_3295	20141002A	In1	In1BA10	Smart+Poly	Small	Frozen DMSO	1568-BA10-sec1	SRR5900469	In	BA10
20141014A_1C17_S22	SC_UCSD_3212	20141014A	In1	In1BA22	Smart+Poly	Small	Frozen DMSO	1568-BA22-sec15	SRR5900386	In	BA22
20141014A_1C35_S34	SC_UCSD_2008	20141014A	In1	In1BA22	Smart+Poly	Small	Frozen DMSO	1568-BA22-sec15	SRR5899182	In	BA22
20141014B_1C11_S16	SC_UCSD_3166	20141014B	In1	In1BA22	Smart+Poly	Small	Frozen DMSO	1568-BA22-sec15	SRR5900340	In	BA22
20141014B_1C47_S40	SC_UCSD_2019	20141014B	In1	In1BA22	Smart+Poly	Small	Frozen DMSO	1568-BA22-sec15	SRR5899193	In	BA22
20141014B_1C68_S62	SC_UCSD_2487	20141014B	In1	In1BA22	Smart+Poly	Small	Frozen DMSO	1568-BA22-sec15	SRR5899661	In	BA22
20141014B_1C80_S74	SC_UCSD_2895	20141014B	In1	In1BA22	Smart+Poly	Small	Frozen DMSO	1568-BA22-sec15	SRR5900069	In	BA22
20141015A_1C11_S53	SC_UCSD_3695	20141015A	In1	In1BA10	Smart+Poly	Small	None	1568-BA10-sec1	SRR5900869	In	BA10
20141015A_1C29_S77	SC_UCSD_1892	20141015A	In1	In1BA10	Smart+Poly	Small	None	1568-BA10-sec1	SRR5899066	In	BA10
20141015A_1C69_S52	SC_UCSD_2293	20141015A	In1	In1BA10	Smart+Poly	Small	None	1568-BA10-sec1	SRR5899467	In	BA10
20141015A_1C80_S87	SC_UCSD_2671	20141015A	In1	In1BA10	Smart+Poly	Small	None	1568-BA10-sec1	SRR5899845	In	BA10
20141015B_1C12_S72	SC_UCSD_2463	20141015B	In1	In1BA10	Smart+Poly	Small	None (0.1% Paraformaldehyde treated)	1568-BA10-sec1	SRR5899637	In	BA10
20141015B_1C22_S37	SC_UCSD_2825	20141015B	In1	In1BA10	Smart+Poly	Small	None (0.1% Paraformaldehyde treated)	1568-BA10-sec1	SRR5899999	In	BA10
20141015B_1C34_S96	SC_UCSD_1868	20141015B	In1	In1BA10	Smart+Poly	Small	None (0.1% Paraformaldehyde treated)	1568-BA10-sec1	SRR5899042	In	BA10
20141015B_1C62_S12	SC_UCSD_1949	20141015B	In1	In1BA10	Smart+Poly	Small	None (0.1% Paraformaldehyde treated)	1568-BA10-sec1	SRR5899123	In	BA10
20141015B_1C75_S71	SC_UCSD_2573	20141015B	In1	In1BA10	Smart+Poly	Small	None (0.1% Paraformaldehyde treated)	1568-BA10-sec1	SRR5899747	In	BA10
20141015B_1C95_S50	SC_UCSD_3035	20141015B	In1	In1BA10	Smart+Poly	Small	None (0.1% Paraformaldehyde treated)	1568-BA10-sec1	SRR5900209	In	BA10
20141016A_1C73_S9	SC_UCSD_2838	20141016A	In1	In1BA22	Smart+Poly	Small	Frozen DMSO	1568-BA22-sec15	SRR5900012	In	BA22
20141016A_1C91_S33	SC_UCSD_2106	20141016A	In1	In1BA22	Smart+Poly	Small	Frozen DMSO	1568-BA22-sec15	SRR5899280	In	BA22
20141016B_1C07_S2	SC_UCSD_3063	20141016B	In1	In1BA22	Smart+Poly	Small	Frozen DMSO	1568-BA22-sec15	SRR5900237	In	BA22
20141016B_1C60_S54	SC_UCSD_3835	20141016B	In1	In1BA22	Smart+Poly	Small	Frozen DMSO	1568-BA22-sec15	SRR5901009	In	BA22
20141021A_1C57_S57	SC_UCSD_3805	20141021A	In1	In1BA22	Smart+Poly	Small	Frozen DMSO	1568-BA22-sec15	SRR5900979	In	BA22
20141021A_1C63_S69	SC_UCSD_2812	20141021A	In1	In1BA22	Smart+Poly	Small	Frozen DMSO	1568-BA22-sec15	SRR5899986	In	BA22
20141021A_1C87_S92	SC_UCSD_3751	20141021A	In1	In1BA22	Smart+Poly	Small	Frozen DMSO	1568-BA22-sec15	SRR5900925	In	BA22
20141021B_1C92_S11	SC_UCSD_2185	20141021B	In1	In1BA22	Smart+Poly	Small	Frozen DMSO	1568-BA22-sec15	SRR5899359	In	BA22
20141022A_1C12_S19	SC_UCSD_2666	20141022A	In1	In1BA41	Smart+Poly	Small	Frozen DMSO	1568-BA41/BA42-sec17	SRR5899840	In	BA41
20141022A_1C45_S17	SC_UCSD_1946	20141022A	In1	In1BA41	Smart+Poly	Small	Frozen DMSO	1568-BA41/BA42-sec17	SRR5899120	In	BA41
20141022A_1C50_S89	SC_UCSD_2031	20141022A	In1	In1BA41	Smart+Poly	Small	Frozen DMSO	1568-BA41/BA42-sec17	SRR5899205	In	BA41
20141022B_1C66_S53	SC_UCSD_3033	20141022B	In1	In1BA10	Smart+Poly	Small	Frozen DMSO	1568-BA10-sec1	SRR5900207	In	BA10
20141022B_1C69_S50	SC_UCSD_2967	20141022B	In1	In1BA10	Smart+Poly	Small	Frozen DMSO	1568-BA10-sec1	SRR5900141	In	BA10
20141022B_1C95_S29	SC_UCSD_3430	20141022B	In1	In1BA10	Smart+Poly	Small	Frozen DMSO	1568-BA10-sec1	SRR5900604	In	BA10
20141027A_1C34_S29	SC_UCSD_3657	20141027A	In1	In1BA21	Smart+Poly	Small	Frozen DMSO	1568-BA21-sec15	SRR5900831	In	BA21
20141027A_1C95_S31	SC_UCSD_3100	20141027A	In1	In1BA21	Smart+Poly	Small	Frozen DMSO	1568-BA21-sec15	SRR5900274	In	BA21
20141027B_1C46_S12	SC_UCSD_3053	20141027B	In1	In1BA21	Smart+Poly	Small	Frozen DMSO	1568-BA21-sec15	SRR5900227	In	BA21
20141027B_1C69_S11	SC_UCSD_2960	20141027B	In1	In1BA21	Smart+Poly	Small	Frozen DMSO	1568-BA21-sec15	SRR5900134	In	BA21
20141027B_1C89_S86	SC_UCSD_2045	20141027B	In1	In1BA21	Smart+Poly	Small	Frozen DMSO	1568-BA21-sec15	SRR5899219	In	BA21
20141028B_1C23_S11	SC_UCSD_3462	20141028B	In1	In1BA17	Smart+Poly	Small	Frozen DMSO	1568-BA17-sec29	SRR5900636	In	BA17
20141029A_1C30_S42	SC_UCSD_2698	20141029A	In1	In1BA17	Smart+Poly	Small	Frozen DMSO	1568-BA17-sec29	SRR5899872	In	BA17
20141029A_1C37_S15	SC_UCSD_2241	20141029A	In1	In1BA17	Smart+Poly	Small	Frozen DMSO	1568-BA17-sec29	SRR5899415	In	BA17
20141029B_1C50_S22	SC_UCSD_2968	20141029B	In1	In1BA41	Smart+Poly	Small	Frozen DMSO	1568-BA41/BA42-sec17	SRR5900142	In	BA41
20141029B_1C56_S34	SC_UCSD_3400	20141029B	In1	In1BA41	Smart+Poly	Small	Frozen DMSO	1568-BA41/BA42-sec17	SRR5900574	In	BA41
20141029B_1C80_S58	SC_UCSD_3715	20141029B	In1	In1BA41	Smart+Poly	Small	Frozen DMSO	1568-BA41/BA42-sec17	SRR5900889	In	BA41
20141112B_1C68_S68	SC_UCSD_2882	20141112B	In1	In1BA10	Smart+Poly	Small	Frozen DMSO	1568-BA10-sec1	SRR5900056	In	BA10
20141112B_1C82_S60	SC_UCSD_3918	20141112B	In1	In1BA10	Smart+Poly	Small	Frozen DMSO	1568-BA10-sec1	SRR5901092	In	BA10
20141113A_1C53_S30	SC_UCSD_2317	20141113A	In1	In1BA41	Smart+Poly	Small	Frozen DMSO	1568-BA41/BA42-sec17	SRR5899491	In	BA41
20141113A_1C72_S19	SC_UCSD_3784	20141113A	In1	In1BA41	Smart+Poly	Small	Frozen DMSO	1568-BA41/BA42-sec17	SRR5900958	In	BA41
20141113A_1C81_S39	SC_UCSD_1876	20141113A	In1	In1BA41	Smart+Poly	Small	Frozen DMSO	1568-BA41/BA42-sec17	SRR5899050	In	BA41
20141113B_1C28_S47	SC_UCSD_2806	20141113B	In1	In1BA41	Smart+Poly	Small	Frozen DMSO	1568-BA41/BA42-sec17	SRR5899980	In	BA41
20141113B_1C38_S56	SC_UCSD_3696	20141113B	In1	In1BA41	Smart+Poly	Small	Frozen DMSO	1568-BA41/BA42-sec17	SRR5900870	In	BA41
20141113B_1C77_S2	SC_UCSD_3024	20141113B	In1	In1BA41	Smart+Poly	Small	Frozen DMSO	1568-BA41/BA42-sec17	SRR5900198	In	BA41
20141117A_1C83_S57	SC_UCSD_2602	20141117A	In1	In1BA41	Smart+Poly	Small	Frozen DMSO	1568-BA41/BA42-sec17	SRR5899776	In	BA41
20141117B_1C08_S23	SC_UCSD_2066	20141117B	In1	In1BA41	Smart+Poly	Small	Frozen DMSO	1568-BA41/BA42-sec17	SRR5899240	In	BA41
20141117B_1C21_S58	SC_UCSD_3123	20141117B	In1	In1BA41	Smart+Poly	Small	Frozen DMSO	1568-BA41/BA42-sec17	SRR5900297	In	BA41
20141118A_1C24_S22	SC_UCSD_2206	20141118A	In1	In1BA41	Smart+Poly	Small	Frozen DMSO	1568-BA41/BA42-sec17	SRR5899380	In	BA41
20141118A_1C31_S6	SC_UCSD_3222	20141118A	In1	In1BA41	Smart+Poly	Small	Frozen DMSO	1568-BA41/BA42-sec17	SRR5900396	In	BA41
20141118A_1C38_S66	SC_UCSD_3886	20141118A	In1	In1BA41	Smart+Poly	Small	Frozen DMSO	1568-BA41/BA42-sec17	SRR5901060	In	BA41
20141118A_1C42_S47	SC_UCSD_3498	20141118A	In1	In1BA41	Smart+Poly	Small	Frozen DMSO	1568-BA41/BA42-sec17	SRR5900672	In	BA41
20141118B_1C11_S6	SC_UCSD_3195	20141118B	In1	In1BA41	Smart+Poly	Small	Frozen DMSO	1568-BA41/BA42-sec17	SRR5900369	In	BA41
20141118B_1C15_S44	SC_UCSD_3299	20141118B	In1	In1BA41	Smart+Poly	Small	Frozen DMSO	1568-BA41/BA42-sec17	SRR5900473	In	BA41
20141118B_1C17_S15	SC_UCSD_2158	20141118B	In1	In1BA41	Smart+Poly	Small	Frozen DMSO	1568-BA41/BA42-sec17	SRR5899332	In	BA41
20141118B_1C22_S7	SC_UCSD_2778	20141118B	In1	In1BA41	Smart+Poly	Small	Frozen DMSO	1568-BA41/BA42-sec17	SRR5899952	In	BA41
20141118B_1C50_S22	SC_UCSD_2342	20141118B	In1	In1BA41	Smart+Poly	Small	Frozen DMSO	1568-BA41/BA42-sec17	SRR5899516	In	BA41
20141118B_1C69_S5	SC_UCSD_3890	20141118B	In1	In1BA41	Smart+Poly	Small	Frozen DMSO	1568-BA41/BA42-sec17	SRR5901064	In	BA41
20141118B_1C84_S42	SC_UCSD_2536	20141118B	In1	In1BA41	Smart+Poly	Small	Frozen DMSO	1568-BA41/BA42-sec17	SRR5899710	In	BA41
20141202A_1C72_S32	SC_UCSD_3768	20141202A	In1	In1BA41	Smart+Poly	Small	Frozen DMSO	1568-BA41/BA42-sec17	SRR5900942	In	BA41
20141202B_1C02_S33	SC_UCSD_1910	20141202B	In1	In1BA41	Smart+Poly	Small	Frozen DMSO	1568-BA41/BA42-sec17	SRR5899084	In	BA41
20141202B_1C73_S71	SC_UCSD_2996	20141202B	In1	In1BA41	Smart+Poly	Small	Frozen DMSO	1568-BA41/BA42-sec17	SRR5900170	In	BA41
20141203B_1C82_S73	SC_UCSD_3051	20141203B	In1	In1BA41	Smart+Poly	Small	Frozen DMSO	1568-BA41/BA42-sec17	SRR5900225	In	BA41
20141204A_1C47_S43	SC_UCSD_3764	20141204A	In1	In1BA41	Smart+Poly	Small	Frozen DMSO	1568-BA41/BA42-sec17	SRR5900938	In	BA41
20141204A_1C70_S32	SC_UCSD_3199	20141204A	In1	In1BA41	Smart+Poly	Small	Frozen DMSO	1568-BA41/BA42-sec17	SRR5900373	In	BA41
20141204A_1C92_S53	SC_UCSD_1921	20141204A	In1	In1BA41	Smart+Poly	Small	Frozen DMSO	1568-BA41/BA42-sec17	SRR5899095	In	BA41
20141204B_1C13_S83	SC_UCSD_2332	20141204B	In1	In1BA41	Smart+Poly	Small	Frozen DMSO	1568-BA41/BA42-sec17	SRR5899506	In	BA41
20141204B_1C16_S27	SC_UCSD_2349	20141204B	In1	In1BA41	Smart+Poly	Small	Frozen DMSO	1568-BA41/BA42-sec17	SRR5899523	In	BA41
20141208A_1C01_S14	SC_UCSD_3458	20141208A	In1	In1BA41	Smart+Poly	Small	Frozen DMSO	1568-BA41/BA42-sec17	SRR5900632	In	BA41
20141208B_1C28_S76	SC_UCSD_2386	20141208B	In1	In1BA41	Smart+Poly	Small	Frozen DMSO	1568-BA41/BA42-sec17	SRR5899560	In	BA41
20141208B_1C29_S44	SC_UCSD_3684	20141208B	In1	In1BA41	Smart+Poly	Small	Frozen DMSO	1568-BA41/BA42-sec17	SRR5900858	In	BA41
20141208B_1C78_S67	SC_UCSD_2189	20141208B	In1	In1BA41	Smart+Poly	Small	Frozen DMSO	1568-BA41/BA42-sec17	SRR5899363	In	BA41
20141208B_1C82_S12	SC_UCSD_2707	20141208B	In1	In1BA41	Smart+Poly	Small	Frozen DMSO	1568-BA41/BA42-sec17	SRR5899881	In	BA41
20141210A_1C37_S69	SC_UCSD_2403	20141210A	In1	In1BA10	Smart+Poly	Small	Frozen DMSO	1568-BA10-sec1	SRR5899577	In	BA10
20141210A_1C77_S14	SC_UCSD_1900	20141210A	In1	In1BA10	Smart+Poly	Small	Frozen DMSO	1568-BA10-sec1	SRR5899074	In	BA10
20141210A_1C82_S62	SC_UCSD_2202	20141210A	In1	In1BA10	Smart+Poly	Small	Frozen DMSO	1568-BA10-sec1	SRR5899376	In	BA10
20141210A_1C90_S73	SC_UCSD_3290	20141210A	In1	In1BA10	Smart+Poly	Small	Frozen DMSO	1568-BA10-sec1	SRR5900464	In	BA10
20141210B_1C05_S6	SC_UCSD_3903	20141210B	In1	In1BA10	Smart+Poly	Small	Frozen DMSO	1568-BA10-sec1	SRR5901077	In	BA10
20141210B_1C91_S65	SC_UCSD_2800	20141210B	In1	In1BA10	Smart+Poly	Small	Frozen DMSO	1568-BA10-sec1	SRR5899974	In	BA10
20141211A_1C01_S46	SC_UCSD_3833	20141211A	In1	In1BA10	Smart+Poly	Small	Frozen DMSO	1568-BA10-sec1	SRR5901007	In	BA10
20141211A_1C26_S22	SC_UCSD_2387	20141211A	In1	In1BA10	Smart+Poly	Small	Frozen DMSO	1568-BA10-sec1	SRR5899561	In	BA10
20141211A_1C45_S23	SC_UCSD_2069	20141211A	In1	In1BA10	Smart+Poly	Small	Frozen DMSO	1568-BA10-sec1	SRR5899243	In	BA10
20141211B_1C42_S22	SC_UCSD_3849	20141211B	In1	In1BA10	Smart+Poly	Small	Frozen DMSO	1568-BA10-sec1	SRR5901023	In	BA10
20141211B_1C61_S74	SC_UCSD_2740	20141211B	In1	In1BA10	Smart+Poly	Small	Frozen DMSO	1568-BA10-sec1	SRR5899914	In	BA10
20141211B_1C67_S85	SC_UCSD_2147	20141211B	In1	In1BA10	Smart+Poly	Small	Frozen DMSO	1568-BA10-sec1	SRR5899321	In	BA10
20150108_1C10_S29	SC_UCSD_2637	20150108	In1	In1BA10	Smart+Poly	Small	Frozen DMSO	1568-BA10-sec1	SRR5899811	In	BA10
20150108_1C22_S41	SC_UCSD_2088	20150108	In1	In1BA10	Smart+Poly	Small	Frozen DMSO	1568-BA10-sec1	SRR5899262	In	BA10
20150108_1C24_S4	SC_UCSD_3402	20150108	In1	In1BA10	Smart+Poly	Small	Frozen DMSO	1568-BA10-sec1	SRR5900576	In	BA10
20150108_1C26_S49	SC_UCSD_2194	20150108	In1	In1BA10	Smart+Poly	Small	Frozen DMSO	1568-BA10-sec1	SRR5899368	In	BA10
20150108_1C27_S2	SC_UCSD_2365	20150108	In1	In1BA10	Smart+Poly	Small	Frozen DMSO	1568-BA10-sec1	SRR5899539	In	BA10
20150108_1C28_S16	SC_UCSD_2780	20150108	In1	In1BA10	Smart+Poly	Small	Frozen DMSO	1568-BA10-sec1	SRR5899954	In	BA10
20150108_1C62_S3	SC_UCSD_2255	20150108	In1	In1BA10	Smart+Poly	Small	Frozen DMSO	1568-BA10-sec1	SRR5899429	In	BA10
20150108_1C82_S66	SC_UCSD_2422	20150108	In1	In1BA10	Smart+Poly	Small	Frozen DMSO	1568-BA10-sec1	SRR5899596	In	BA10
20150108_1C94_S78	SC_UCSD_2851	20150108	In1	In1BA10	Smart+Poly	Small	Frozen DMSO	1568-BA10-sec1	SRR5900025	In	BA10
20150112B_1C06_S92	SC_UCSD_2141	20150112B	In1	In1BA17	Smart+Poly	Small	Frozen DMSO	1568-BA17-sec29	SRR5899315	In	BA17
20150122B_1C05_S16	SC_UCSD_2794	20150122B	In1	In1BA17	Smart+Poly	Small	Frozen DMSO	1568-BA17-sec29	SRR5899968	In	BA17
20150122B_1C66_S57	SC_UCSD_2466	20150122B	In1	In1BA17	Smart+Poly	Small	Frozen DMSO	1568-BA17-sec29	SRR5899640	In	BA17
20140213_1C63_S30	SC_UCSD_114	20140213	In2	In2BA8	Smart+	Medium	None	1568-BA8-sec7	SRR1764012	In	BA8
20140320_1C81_S64	SC_UCSD_996	20140320	In2	In2BA8	Smart+	Medium	None	1568-BA8-sec9	SRR2137510	In	BA8
20140422_1C87_S19	SC_UCSD_3487	20140422	In2	In2BA22	Smart+	Small	None	1568-BA22-sec15	SRR5900661	In	BA22
20140424_1C70_S90	SC_UCSD_2834	20140424	In2	In2BA41	Smart+	Small	None	1568-BA41/BA42-sec17	SRR5900008	In	BA41
20140605_1C17_S11	SC_UCSD_1257	20140605	In2	In2BA22	Smart+	Small	Frozen DMSO	1568-BA22-sec15	SRR3230296	In	BA22
20140605_1C34_S58	SC_UCSD_3943	20140605	In2	In2BA22	Smart+	Small	Frozen DMSO	1568-BA22-sec15	SRR5897264	In	BA22
20140715_1C04_S70	SC_UCSD_1283	20140715	In2	In2BA21	Smart+	Small	Frozen DMSO	1568-BA21-sec15	SRR3230322	In	BA21
20140715_1C50_S52	SC_UCSD_1266	20140715	In2	In2BA21	Smart+	Small	Frozen DMSO	1568-BA21-sec15	SRR3230305	In	BA21
20140715_1C72_S87	SC_UCSD_1302	20140715	In2	In2BA21	Smart+	Small	Frozen DMSO	1568-BA21-sec15	SRR3230341	In	BA21
20140716_1C24_S34	SC_UCSD_3933	20140716	In2	In2BA21	Smart+	Small	Frozen DMSO	1568-BA21-sec15	SRR5897254	In	BA21
20140723_1C61_S27	SC_UCSD_1407	20140723	In2	In2BA21	Smart+	Small	Frozen DMSO	1568-BA21-sec15	SRR3230446	In	BA21
20140723_1C66_S68	SC_UCSD_1393	20140723	In2	In2BA21	Smart+	Small	Frozen DMSO	1568-BA21-sec15	SRR3230432	In	BA21
20140723_1C80_S28	SC_UCSD_1426	20140723	In2	In2BA21	Smart+	Small	Frozen DMSO	1568-BA21-sec15	SRR3230465	In	BA21
20140909A_1C29_S6	SC_UCSD_1759	20140909A	In2	In2BA22	Smart+	Small	Frozen DMSO	1568-BA22-sec15	SRR3230798	In	BA22
20141001B_1C40_S28	SC_UCSD_2694	20141001B	In2	In2BA10	Smart+Poly	Small	Frozen DMSO	1568-BA10-sec1	SRR5899868	In	BA10
20141001B_1C54_S6	SC_UCSD_2364	20141001B	In2	In2BA10	Smart+Poly	Small	Frozen DMSO	1568-BA10-sec1	SRR5899538	In	BA10
20141008B_1C15_S25	SC_UCSD_3579	20141008B	In2	In2BA17	Smart+Poly	Small	Frozen DMSO	1568-BA17-sec29	SRR5900753	In	BA17
20141014A_1C21_S66	SC_UCSD_2871	20141014A	In2	In2BA22	Smart+Poly	Small	Frozen DMSO	1568-BA22-sec15	SRR5900045	In	BA22
20141014A_1C96_S59	SC_UCSD_2842	20141014A	In2	In2BA22	Smart+Poly	Small	Frozen DMSO	1568-BA22-sec15	SRR5900016	In	BA22
20141015A_1C45_S86	SC_UCSD_2663	20141015A	In2	In2BA10	Smart+Poly	Small	None	1568-BA10-sec1	SRR5899837	In	BA10
20141016B_1C01_S85	SC_UCSD_3015	20141016B	In2	In2BA22	Smart+Poly	Small	Frozen DMSO	1568-BA22-sec15	SRR5900189	In	BA22
20141016B_1C13_S14	SC_UCSD_3494	20141016B	In2	In2BA22	Smart+Poly	Small	Frozen DMSO	1568-BA22-sec15	SRR5900668	In	BA22
20141021B_1C95_S52	SC_UCSD_2509	20141021B	In2	In2BA22	Smart+Poly	Small	Frozen DMSO	1568-BA22-sec15	SRR5899683	In	BA22
20141022A_1C46_S79	SC_UCSD_2841	20141022A	In2	In2BA41	Smart+Poly	Small	Frozen DMSO	1568-BA41/BA42-sec17	SRR5900015	In	BA41
20141028B_1C84_S60	SC_UCSD_3071	20141028B	In2	In2BA17	Smart+Poly	Small	Frozen DMSO	1568-BA17-sec29	SRR5900245	In	BA17
20141028B_1C93_S80	SC_UCSD_3665	20141028B	In2	In2BA17	Smart+Poly	Small	Frozen DMSO	1568-BA17-sec29	SRR5900839	In	BA17
20141112B_1C34_S57	SC_UCSD_2923	20141112B	In2	In2BA10	Smart+Poly	Small	Frozen DMSO	1568-BA10-sec1	SRR5900097	In	BA10
20141112B_1C84_S47	SC_UCSD_3186	20141112B	In2	In2BA10	Smart+Poly	Small	Frozen DMSO	1568-BA10-sec1	SRR5900360	In	BA10
20141113A_1C31_S37	SC_UCSD_2136	20141113A	In2	In2BA41	Smart+Poly	Small	Frozen DMSO	1568-BA41/BA42-sec17	SRR5899310	In	BA41
20141113A_1C48_S65	SC_UCSD_2469	20141113A	In2	In2BA41	Smart+Poly	Small	Frozen DMSO	1568-BA41/BA42-sec17	SRR5899643	In	BA41
20141117A_1C39_S28	SC_UCSD_2818	20141117A	In2	In2BA41	Smart+Poly	Small	Frozen DMSO	1568-BA41/BA42-sec17	SRR5899992	In	BA41
20141117A_1C48_S44	SC_UCSD_3132	20141117A	In2	In2BA41	Smart+Poly	Small	Frozen DMSO	1568-BA41/BA42-sec17	SRR5900306	In	BA41
20141117B_1C90_S40	SC_UCSD_3468	20141117B	In2	In2BA41	Smart+Poly	Small	Frozen DMSO	1568-BA41/BA42-sec17	SRR5900642	In	BA41
20141118A_1C19_S31	SC_UCSD_3523	20141118A	In2	In2BA41	Smart+Poly	Small	Frozen DMSO	1568-BA41/BA42-sec17	SRR5900697	In	BA41
20141118A_1C22_S11	SC_UCSD_1939	20141118A	In2	In2BA41	Smart+Poly	Small	Frozen DMSO	1568-BA41/BA42-sec17	SRR5899113	In	BA41
20141118B_1C90_S50	SC_UCSD_2893	20141118B	In2	In2BA41	Smart+Poly	Small	Frozen DMSO	1568-BA41/BA42-sec17	SRR5900067	In	BA41
20141202A_1C07_S38	SC_UCSD_2728	20141202A	In2	In2BA41	Smart+Poly	Small	Frozen DMSO	1568-BA41/BA42-sec17	SRR5899902	In	BA41
20141202A_1C63_S52	SC_UCSD_2208	20141202A	In2	In2BA41	Smart+Poly	Small	Frozen DMSO	1568-BA41/BA42-sec17	SRR5899382	In	BA41
20141202B_1C37_S9	SC_UCSD_1948	20141202B	In2	In2BA41	Smart+Poly	Small	Frozen DMSO	1568-BA41/BA42-sec17	SRR5899122	In	BA41
20141204A_1C61_S28	SC_UCSD_3221	20141204A	In2	In2BA41	Smart+Poly	Small	Frozen DMSO	1568-BA41/BA42-sec17	SRR5900395	In	BA41
20141204B_1C88_S17	SC_UCSD_3194	20141204B	In2	In2BA41	Smart+Poly	Small	Frozen DMSO	1568-BA41/BA42-sec17	SRR5900368	In	BA41
20141208A_1C46_S53	SC_UCSD_2006	20141208A	In2	In2BA41	Smart+Poly	Small	Frozen DMSO	1568-BA41/BA42-sec17	SRR5899180	In	BA41
20141208B_1C49_S7	SC_UCSD_2917	20141208B	In2	In2BA41	Smart+Poly	Small	Frozen DMSO	1568-BA41/BA42-sec17	SRR5900091	In	BA41
20141208B_1C74_S64	SC_UCSD_3680	20141208B	In2	In2BA41	Smart+Poly	Small	Frozen DMSO	1568-BA41/BA42-sec17	SRR5900854	In	BA41
20141210A_1C83_S26	SC_UCSD_3526	20141210A	In2	In2BA10	Smart+Poly	Small	Frozen DMSO	1568-BA10-sec1	SRR5900700	In	BA10
20141210B_1C39_S52	SC_UCSD_1976	20141210B	In2	In2BA10	Smart+Poly	Small	Frozen DMSO	1568-BA10-sec1	SRR5899150	In	BA10
20141210B_1C55_S64	SC_UCSD_3445	20141210B	In2	In2BA10	Smart+Poly	Small	Frozen DMSO	1568-BA10-sec1	SRR5900619	In	BA10
20141210B_1C93_S5	SC_UCSD_2089	20141210B	In2	In2BA10	Smart+Poly	Small	Frozen DMSO	1568-BA10-sec1	SRR5899263	In	BA10
20141211A_1C07_S58	SC_UCSD_1913	20141211A	In2	In2BA10	Smart+Poly	Small	Frozen DMSO	1568-BA10-sec1	SRR5899087	In	BA10
20141211A_1C32_S34	SC_UCSD_2779	20141211A	In2	In2BA10	Smart+Poly	Small	Frozen DMSO	1568-BA10-sec1	SRR5899953	In	BA10
20141211A_1C70_S3	SC_UCSD_3007	20141211A	In2	In2BA10	Smart+Poly	Small	Frozen DMSO	1568-BA10-sec1	SRR5900181	In	BA10
20150112A_1C19_S21	SC_UCSD_2245	20150112A	In2	In2BA17	Smart+Poly	Small	Frozen DMSO	1568-BA17-sec29	SRR5899419	In	BA17
20150112B_1C08_S29	SC_UCSD_1985	20150112B	In2	In2BA17	Smart+Poly	Small	Frozen DMSO	1568-BA17-sec29	SRR5899159	In	BA17
20150112B_1C09_S64	SC_UCSD_1996	20150112B	In2	In2BA17	Smart+Poly	Small	Frozen DMSO	1568-BA17-sec29	SRR5899170	In	BA17
20150112B_1C38_S53	SC_UCSD_3094	20150112B	In2	In2BA17	Smart+Poly	Small	Frozen DMSO	1568-BA17-sec29	SRR5900268	In	BA17
20140213_1C58_S22	SC_UCSD_285	20140213	In3	In3BA8	Smart+	Medium	None	1568-BA8-sec7	SRR1764176	In	BA8
20140220_1C95	SC_UCSD_142	20140220	In3	In3BA8	Smart+	Medium	None	1568-BA8-sec9	SRR1764040	In	BA8
20140226_1C01	SC_UCSD_19	20140226	In3	In3BA8	Smart+	Medium	Frozen DMSO	1568-BA8-sec9	SRR1763925	In	BA8
20140227_1C84_S70	SC_UCSD_177	20140227	In3	In3BA8	Smart+	Medium	None	1568-BA8-sec9	SRR1764073	In	BA8
20140304_1C07_S9	SC_UCSD_668	20140304	In3	In3BA8	Smart+	Small	None	1568-BA8-sec9	SRR2137182	In	BA8
20140304_1C19_S17	SC_UCSD_897	20140304	In3	In3BA8	Smart+	Small	None	1568-BA8-sec9	SRR2137411	In	BA8
20140304_1C93_S32	SC_UCSD_963	20140304	In3	In3BA8	Smart+	Small	None	1568-BA8-sec9	SRR2137477	In	BA8
20140313_1C61_S28	SC_UCSD_762	20140313	In3	In3BA8	Smart+	Medium	None	1568-BA8-sec9	SRR2137276	In	BA8
20140326_1C62_S23	SC_UCSD_1004	20140326	In3	In3BA8	Smart+	Medium	Frozen DMSO	1568-BA8-sec9	SRR2137518	In	BA8
20140402_1C56_S63	SC_UCSD_892	20140402	In3	In3BA8	Smart+Poly	Small	Frozen DMSO	1568-BA8-sec9	SRR2137406	In	BA8
20140415_1C58_S144	SC_UCSD_1156	20140415	In3	In3BA21	Smart+	Small	None	1568-BA21-sec15	SRR3230195	In	BA21
20140424_1C04_S85	SC_UCSD_2840	20140424	In3	In3BA41	Smart+	Small	None	1568-BA41/BA42-sec17	SRR5900014	In	BA41
20140424_1C35_S82	SC_UCSD_2645	20140424	In3	In3BA41	Smart+	Small	None	1568-BA41/BA42-sec17	SRR5899819	In	BA41
20140424_1C67_S61	SC_UCSD_3603	20140424	In3	In3BA41	Smart+	Small	None	1568-BA41/BA42-sec17	SRR5900777	In	BA41
20140501_1C83_S54	SC_UCSD_1229	20140501	In3	In3BA21	Smart+	Small	Frozen DMSO	1568-BA21-sec15	SRR3230268	In	BA21
20140605_1C40_S70	SC_UCSD_1256	20140605	In3	In3BA22	Smart+	Small	Frozen DMSO	1568-BA22-sec15	SRR3230295	In	BA22
20140605_1C67_S92	SC_UCSD_3921	20140605	In3	In3BA22	Smart+	Small	Frozen DMSO	1568-BA22-sec15	SRR5897242	In	BA22
20140605_1C87_S33	SC_UCSD_1246	20140605	In3	In3BA22	Smart+	Small	Frozen DMSO	1568-BA22-sec15	SRR3230285	In	BA22
20140715_1C11_S68	SC_UCSD_1288	20140715	In3	In3BA21	Smart+	Small	Frozen DMSO	1568-BA21-sec15	SRR3230327	In	BA21
20140715_1C22_S73	SC_UCSD_1276	20140715	In3	In3BA21	Smart+	Small	Frozen DMSO	1568-BA21-sec15	SRR3230315	In	BA21
20140715_1C76_S88	SC_UCSD_1291	20140715	In3	In3BA21	Smart+	Small	Frozen DMSO	1568-BA21-sec15	SRR3230330	In	BA21
20140715_1C78_S79	SC_UCSD_1280	20140715	In3	In3BA21	Smart+	Small	Frozen DMSO	1568-BA21-sec15	SRR3230319	In	BA21
20140716_1C26_S4	SC_UCSD_1364	20140716	In3	In3BA21	Smart+	Small	Frozen DMSO	1568-BA21-sec15	SRR3230403	In	BA21
20140722_1C21_S69	SC_UCSD_1365	20140722	In3	In3BA21	Smart+	Small	Frozen DMSO	1568-BA21-sec15	SRR3230404	In	BA21
20140723_1C12_S53	SC_UCSD_1411	20140723	In3	In3BA21	Smart+	Small	Frozen DMSO	1568-BA21-sec15	SRR3230450	In	BA21
20140724_1C43_S69	SC_UCSD_1443	20140724	In3	In3BA21	Smart+	Small	Frozen DMSO	1568-BA21-sec15	SRR3230482	In	BA21
20140815A_1C57_S30	SC_UCSD_1559	20140815A	In3	In3BA21	Smart+	Small	Frozen DMSO	1568-BA21-sec15	SRR3230598	In	BA21
20140815B_1C81_S96	SC_UCSD_1609	20140815B	In3	In3BA21	Smart+	Small	Frozen DMSO	1568-BA21-sec15	SRR3230648	In	BA21
20140819_1C22_S92	SC_UCSD_1501	20140819	In3	In3BA41	Smart+	Small	Frozen DMSO	1568-BA41/BA42-sec17	SRR3230540	In	BA41
20140826_1C50_S12	SC_UCSD_1532	20140826	In3	In3BA41	Smart+	Small	Frozen DMSO	1568-BA41/BA42-sec17	SRR3230571	In	BA41
20141014A_1C94_S60	SC_UCSD_2682	20141014A	In3	In3BA22	Smart+Poly	Small	Frozen DMSO	1568-BA22-sec15	SRR5899856	In	BA22
20141015A_1C25_S37	SC_UCSD_3677	20141015A	In3	In3BA10	Smart+Poly	Small	None	1568-BA10-sec1	SRR5900851	In	BA10
20141015A_1C47_S18	SC_UCSD_3525	20141015A	In3	In3BA10	Smart+Poly	Small	None	1568-BA10-sec1	SRR5900699	In	BA10
20141015A_1C54_S44	SC_UCSD_2145	20141015A	In3	In3BA10	Smart+Poly	Small	None	1568-BA10-sec1	SRR5899319	In	BA10
20141015A_1C70_S31	SC_UCSD_3566	20141015A	In3	In3BA10	Smart+Poly	Small	None	1568-BA10-sec1	SRR5900740	In	BA10
20141015B_1C37_S93	SC_UCSD_2413	20141015B	In3	In3BA10	Smart+Poly	Small	None (0.1% Paraformaldehyde treated)	1568-BA10-sec1	SRR5899587	In	BA10
20141015B_1C49_S47	SC_UCSD_3077	20141015B	In3	In3BA10	Smart+Poly	Small	None (0.1% Paraformaldehyde treated)	1568-BA10-sec1	SRR5900251	In	BA10
20141015B_1C73_S48	SC_UCSD_3514	20141015B	In3	In3BA10	Smart+Poly	Small	None (0.1% Paraformaldehyde treated)	1568-BA10-sec1	SRR5900688	In	BA10
20141016B_1C29_S16	SC_UCSD_1984	20141016B	In3	In3BA22	Smart+Poly	Small	Frozen DMSO	1568-BA22-sec15	SRR5899158	In	BA22
20141021A_1C69_S81	SC_UCSD_3081	20141021A	In3	In3BA22	Smart+Poly	Small	Frozen DMSO	1568-BA22-sec15	SRR5900255	In	BA22
20141022A_1C16_S92	SC_UCSD_2555	20141022A	In3	In3BA41	Smart+Poly	Small	Frozen DMSO	1568-BA41/BA42-sec17	SRR5899729	In	BA41
20141027B_1C80_S46	SC_UCSD_2103	20141027B	In3	In3BA21	Smart+Poly	Small	Frozen DMSO	1568-BA21-sec15	SRR5899277	In	BA21
20141028A_1C69_S30	SC_UCSD_1899	20141028A	In3	In3BA21	Smart+Poly	Small	Frozen DMSO	1568-BA21-sec15	SRR5899073	In	BA21
20141113A_1C09_S1	SC_UCSD_3003	20141113A	In3	In3BA41	Smart+Poly	Small	Frozen DMSO	1568-BA41/BA42-sec17	SRR5900177	In	BA41
20141113A_1C70_S89	SC_UCSD_2856	20141113A	In3	In3BA41	Smart+Poly	Small	Frozen DMSO	1568-BA41/BA42-sec17	SRR5900030	In	BA41
20141113B_1C44_S68	SC_UCSD_2919	20141113B	In3	In3BA41	Smart+Poly	Small	Frozen DMSO	1568-BA41/BA42-sec17	SRR5900093	In	BA41
20141113B_1C50_S69	SC_UCSD_3125	20141113B	In3	In3BA41	Smart+Poly	Small	Frozen DMSO	1568-BA41/BA42-sec17	SRR5900299	In	BA41
20141113B_1C62_S93	SC_UCSD_2854	20141113B	In3	In3BA41	Smart+Poly	Small	Frozen DMSO	1568-BA41/BA42-sec17	SRR5900028	In	BA41
20141117A_1C59_S9	SC_UCSD_3263	20141117A	In3	In3BA41	Smart+Poly	Small	Frozen DMSO	1568-BA41/BA42-sec17	SRR5900437	In	BA41
20141117A_1C87_S5	SC_UCSD_3611	20141117A	In3	In3BA41	Smart+Poly	Small	Frozen DMSO	1568-BA41/BA42-sec17	SRR5900785	In	BA41
20141118B_1C01_S53	SC_UCSD_3630	20141118B	In3	In3BA41	Smart+Poly	Small	Frozen DMSO	1568-BA41/BA42-sec17	SRR5900804	In	BA41
20141118B_1C07_S61	SC_UCSD_3386	20141118B	In3	In3BA41	Smart+Poly	Small	Frozen DMSO	1568-BA41/BA42-sec17	SRR5900560	In	BA41
20141118B_1C41_S41	SC_UCSD_3284	20141118B	In3	In3BA41	Smart+Poly	Small	Frozen DMSO	1568-BA41/BA42-sec17	SRR5900458	In	BA41
20141202A_1C38_S14	SC_UCSD_2331	20141202A	In3	In3BA41	Smart+Poly	Small	Frozen DMSO	1568-BA41/BA42-sec17	SRR5899505	In	BA41
20141202B_1C45_S34	SC_UCSD_2099	20141202B	In3	In3BA41	Smart+Poly	Small	Frozen DMSO	1568-BA41/BA42-sec17	SRR5899273	In	BA41
20141202B_1C86_S47	SC_UCSD_3243	20141202B	In3	In3BA41	Smart+Poly	Small	Frozen DMSO	1568-BA41/BA42-sec17	SRR5900417	In	BA41
20141203A_1C33_S76	SC_UCSD_2746	20141203A	In3	In3BA41	Smart+Poly	Small	Frozen DMSO	1568-BA41/BA42-sec17	SRR5899920	In	BA41
20141203B_1C27_S32	SC_UCSD_2902	20141203B	In3	In3BA41	Smart+Poly	Small	Frozen DMSO	1568-BA41/BA42-sec17	SRR5900076	In	BA41
20141204B_1C41_S3	SC_UCSD_2745	20141204B	In3	In3BA41	Smart+Poly	Small	Frozen DMSO	1568-BA41/BA42-sec17	SRR5899919	In	BA41
20141208A_1C45_S74	SC_UCSD_3802	20141208A	In3	In3BA41	Smart+Poly	Small	Frozen DMSO	1568-BA41/BA42-sec17	SRR5900976	In	BA41
20141208A_1C69_S52	SC_UCSD_2584	20141208A	In3	In3BA41	Smart+Poly	Small	Frozen DMSO	1568-BA41/BA42-sec17	SRR5899758	In	BA41
20141208B_1C20_S84	SC_UCSD_2053	20141208B	In3	In3BA41	Smart+Poly	Small	Frozen DMSO	1568-BA41/BA42-sec17	SRR5899227	In	BA41
20141208B_1C26_S6	SC_UCSD_2381	20141208B	In3	In3BA41	Smart+Poly	Small	Frozen DMSO	1568-BA41/BA42-sec17	SRR5899555	In	BA41
20141208B_1C92_S86	SC_UCSD_2944	20141208B	In3	In3BA41	Smart+Poly	Small	Frozen DMSO	1568-BA41/BA42-sec17	SRR5900118	In	BA41
20141210A_1C25_S45	SC_UCSD_3345	20141210A	In3	In3BA10	Smart+Poly	Small	Frozen DMSO	1568-BA10-sec1	SRR5900519	In	BA10
20141210B_1C20_S51	SC_UCSD_3261	20141210B	In3	In3BA10	Smart+Poly	Small	Frozen DMSO	1568-BA10-sec1	SRR5900435	In	BA10
20141210B_1C84_S8	SC_UCSD_2553	20141210B	In3	In3BA10	Smart+Poly	Small	Frozen DMSO	1568-BA10-sec1	SRR5899727	In	BA10
20141211A_1C02_S81	SC_UCSD_2873	20141211A	In3	In3BA10	Smart+Poly	Small	Frozen DMSO	1568-BA10-sec1	SRR5900047	In	BA10
20141211B_1C24_S54	SC_UCSD_2439	20141211B	In3	In3BA10	Smart+Poly	Small	Frozen DMSO	1568-BA10-sec1	SRR5899613	In	BA10
20141211B_1C72_S90	SC_UCSD_3586	20141211B	In3	In3BA10	Smart+Poly	Small	Frozen DMSO	1568-BA10-sec1	SRR5900760	In	BA10
20140123_1C62_S125	SC_UCSD_288	20140123	In4	In4BA8	Smart+	Medium	None	1568-BA8-sec7	SRR1764179	In	BA8
20140123_1C83_S167	SC_UCSD_94	20140123	In4	In4BA8	Smart+	Medium	None	1568-BA8-sec7	SRR1763994	In	BA8
20140123_1C92_S185	SC_UCSD_518	20140123	In4	In4BA8	Smart+	Medium	None	1568-BA8-sec7	SRR1764384	In	BA8
20140205_1C50_S5	SC_UCSD_456	20140205	In4	In4BA8	Smart	Medium	None	1568-BA8-sec9	SRR1764331	In	BA8
20140213_1C51_S6	SC_UCSD_306	20140213	In4	In4BA8	Smart+	Medium	None	1568-BA8-sec7	SRR1764195	In	BA8
20140220_1C91	SC_UCSD_423	20140220	In4	In4BA8	Smart+	Medium	None	1568-BA8-sec9	SRR1764299	In	BA8
20140225_1C74	SC_UCSD_251	20140225	In4	In4BA8	Smart+	Medium	None	1568-BA8-sec9	SRR1764143	In	BA8
20140227_1C12_S19	SC_UCSD_79	20140227	In4	In4BA8	Smart+	Medium	None	1568-BA8-sec9	SRR1763980	In	BA8
20140227_1C28_S55	SC_UCSD_444	20140227	In4	In4BA8	Smart+	Medium	None	1568-BA8-sec9	SRR1764319	In	BA8
20140227_1C77_S59	SC_UCSD_160	20140227	In4	In4BA8	Smart+	Medium	None	1568-BA8-sec9	SRR1764057	In	BA8
20140227_1C83_S71	SC_UCSD_416	20140227	In4	In4BA8	Smart+	Medium	None	1568-BA8-sec9	SRR1764292	In	BA8
20140304_1C16_S14	SC_UCSD_809	20140304	In4	In4BA8	Smart+	Small	None	1568-BA8-sec9	SRR2137323	In	BA8
20140304_1C91_S34	SC_UCSD_694	20140304	In4	In4BA8	Smart+	Small	None	1568-BA8-sec9	SRR2137208	In	BA8
20140311_1C33_S63	SC_UCSD_1093	20140311	In4	In4BA8	Smart+	Medium	None	1568-BA8-sec9	SRR2137607	In	BA8
20140311_1C63_S30	SC_UCSD_715	20140311	In4	In4BA8	Smart+	Medium	None	1568-BA8-sec9	SRR2137229	In	BA8
20140311_1C64_S34	SC_UCSD_650	20140311	In4	In4BA8	Smart+	Medium	None	1568-BA8-sec9	SRR2137164	In	BA8
20140311_1C87_S76	SC_UCSD_767	20140311	In4	In4BA8	Smart+	Medium	None	1568-BA8-sec9	SRR2137281	In	BA8
20140313_1C05_S8	SC_UCSD_896	20140313	In4	In4BA8	Smart+	Medium	None	1568-BA8-sec9	SRR2137410	In	BA8
20140313_1C18_S31	SC_UCSD_598	20140313	In4	In4BA8	Smart+	Medium	None	1568-BA8-sec9	SRR2137112	In	BA8
20140313_1C26_S50	SC_UCSD_1064	20140313	In4	In4BA8	Smart+	Medium	None	1568-BA8-sec9	SRR2137578	In	BA8
20140313_1C57_S18	SC_UCSD_602	20140313	In4	In4BA8	Smart+	Medium	None	1568-BA8-sec9	SRR2137116	In	BA8
20140317_1C74_S53	SC_UCSD_1007	20140317	In4	In4BA8	Smart+	Medium	Frozen DMSO	1568-BA8-sec9	SRR2137521	In	BA8
20140317_1C82_S72	SC_UCSD_693	20140317	In4	In4BA8	Smart+	Medium	Frozen DMSO	1568-BA8-sec9	SRR2137207	In	BA8
20140317_1C96_S94	SC_UCSD_590	20140317	In4	In4BA8	Smart+	Medium	Frozen DMSO	1568-BA8-sec9	SRR2137104	In	BA8
20140320_1C18_S31	SC_UCSD_804	20140320	In4	In4BA8	Smart+	Medium	None	1568-BA8-sec9	SRR2137318	In	BA8
20140320_1C74_S53	SC_UCSD_567	20140320	In4	In4BA8	Smart+	Medium	None	1568-BA8-sec9	SRR2137081	In	BA8
20140320_1C76_S60	SC_UCSD_750	20140320	In4	In4BA8	Smart+	Medium	None	1568-BA8-sec9	SRR2137264	In	BA8
20140320_1C91_S90	SC_UCSD_991	20140320	In4	In4BA8	Smart+	Medium	None	1568-BA8-sec9	SRR2137505	In	BA8
20140320_1C92_S89	SC_UCSD_780	20140320	In4	In4BA8	Smart+	Medium	None	1568-BA8-sec9	SRR2137294	In	BA8
20140321_1C24_S43	SC_UCSD_637	20140321	In4	In4BA8	Smart+	Medium	Frozen Glycerol	1568-BA8-sec9	SRR2137151	In	BA8
20140321_1C56_S17	SC_UCSD_597	20140321	In4	In4BA8	Smart+	Medium	Frozen Glycerol	1568-BA8-sec9	SRR2137111	In	BA8
20140321_1C64_S34	SC_UCSD_591	20140321	In4	In4BA8	Smart+	Medium	Frozen Glycerol	1568-BA8-sec9	SRR2137105	In	BA8
20140321_1C76_S60	SC_UCSD_545	20140321	In4	In4BA8	Smart+	Medium	Frozen Glycerol	1568-BA8-sec9	SRR2137059	In	BA8
20140326_1C70_S49	SC_UCSD_583	20140326	In4	In4BA8	Smart+	Medium	Frozen DMSO	1568-BA8-sec9	SRR2137097	In	BA8
20140402_1C15_S64	SC_UCSD_871	20140402	In4	In4BA8	Smart+Poly	Small	Frozen DMSO	1568-BA8-sec9	SRR2137385	In	BA8
20140402_1C64_S71	SC_UCSD_1068	20140402	In4	In4BA8	Smart+Poly	Small	Frozen DMSO	1568-BA8-sec9	SRR2137582	In	BA8
20140402_1C93_S97	SC_UCSD_880	20140402	In4	In4BA8	Smart+Poly	Small	Frozen DMSO	1568-BA8-sec9	SRR2137394	In	BA8
20140415_1C15_S112	SC_UCSD_1150	20140415	In4	In4BA21	Smart+	Small	None	1568-BA21-sec15	SRR3230189	In	BA21
20140415_1C19_S122	SC_UCSD_1157	20140415	In4	In4BA21	Smart+	Small	None	1568-BA21-sec15	SRR3230196	In	BA21
20140422_1C13_S11	SC_UCSD_2339	20140422	In4	In4BA22	Smart+	Small	None	1568-BA22-sec15	SRR5899513	In	BA22
20140424_1C10_S86	SC_UCSD_2656	20140424	In4	In4BA41	Smart+	Small	None	1568-BA41/BA42-sec17	SRR5899830	In	BA41
20140424_1C42_S87	SC_UCSD_3168	20140424	In4	In4BA41	Smart+	Small	None	1568-BA41/BA42-sec17	SRR5900342	In	BA41
20140424_1C83_S96	SC_UCSD_2161	20140424	In4	In4BA41	Smart+	Small	None	1568-BA41/BA42-sec17	SRR5899335	In	BA41
20140715_1C49_S47	SC_UCSD_1279	20140715	In4	In4BA21	Smart+	Small	Frozen DMSO	1568-BA21-sec15	SRR3230318	In	BA21
20140723_1C07_S62	SC_UCSD_1405	20140723	In4	In4BA21	Smart+	Small	Frozen DMSO	1568-BA21-sec15	SRR3230444	In	BA21
20140723_1C36_S55	SC_UCSD_1408	20140723	In4	In4BA21	Smart+	Small	Frozen DMSO	1568-BA21-sec15	SRR3230447	In	BA21
20140723_1C44_S38	SC_UCSD_1424	20140723	In4	In4BA21	Smart+	Small	Frozen DMSO	1568-BA21-sec15	SRR3230463	In	BA21
20140723_1C94_S9	SC_UCSD_1421	20140723	In4	In4BA21	Smart+	Small	Frozen DMSO	1568-BA21-sec15	SRR3230460	In	BA21
20140815A_1C46_S19	SC_UCSD_1563	20140815A	In4	In4BA21	Smart+	Small	Frozen DMSO	1568-BA21-sec15	SRR3230602	In	BA21
20140819_1C11_S8	SC_UCSD_1490	20140819	In4	In4BA41	Smart+	Small	Frozen DMSO	1568-BA41/BA42-sec17	SRR3230529	In	BA41
20140819_1C44_S41	SC_UCSD_1488	20140819	In4	In4BA41	Smart+	Small	Frozen DMSO	1568-BA41/BA42-sec17	SRR3230527	In	BA41
20140819_1C64_S33	SC_UCSD_1502	20140819	In4	In4BA41	Smart+	Small	Frozen DMSO	1568-BA41/BA42-sec17	SRR3230541	In	BA41
20140819_1C81_S54	SC_UCSD_3948	20140819	In4	In4BA41	Smart+	Small	Frozen DMSO	1568-BA41/BA42-sec17	SRR5897269	In	BA41
20140819_1C86_S7	SC_UCSD_1513	20140819	In4	In4BA41	Smart+	Small	Frozen DMSO	1568-BA41/BA42-sec17	SRR3230552	In	BA41
20140826_1C20_S11	SC_UCSD_1544	20140826	In4	In4BA41	Smart+	Small	Frozen DMSO	1568-BA41/BA42-sec17	SRR3230583	In	BA41
20140826_1C80_S24	SC_UCSD_1545	20140826	In4	In4BA41	Smart+	Small	Frozen DMSO	1568-BA41/BA42-sec17	SRR3230584	In	BA41
20140827A_1C67_S40	SC_UCSD_1689	20140827A	In4	In4BA10	Smart+	Small	None	1568-BA10-sec1	SRR3230728	In	BA10
20140827A_1C70_S49	SC_UCSD_1676	20140827A	In4	In4BA10	Smart+	Small	None	1568-BA10-sec1	SRR3230715	In	BA10
20140909A_1C07_S74	SC_UCSD_1752	20140909A	In4	In4BA22	Smart+	Small	Frozen DMSO	1568-BA22-sec15	SRR3230791	In	BA22
20140909A_1C12_S29	SC_UCSD_1738	20140909A	In4	In4BA22	Smart+	Small	Frozen DMSO	1568-BA22-sec15	SRR3230777	In	BA22
20140909A_1C68_S16	SC_UCSD_1726	20140909A	In4	In4BA22	Smart+	Small	Frozen DMSO	1568-BA22-sec15	SRR3230765	In	BA22
20140909B_1C14_S65	SC_UCSD_1766	20140909B	In4	In4BA41	Smart+	Small	None	1568-BA41/BA42-sec17	SRR3230805	In	BA41
20140930A_1C29_S83	SC_UCSD_1788	20140930A	In4	In4BA10	Smart+Poly	Small	None	1568-BA10-sec1	SRR3230826	In	BA10
20140930A_1C41_S12	SC_UCSD_1789	20140930A	In4	In4BA10	Smart+Poly	Small	None	1568-BA10-sec1	SRR3230827	In	BA10
20140930A_1C78_S84	SC_UCSD_1786	20140930A	In4	In4BA10	Smart+Poly	Small	None	1568-BA10-sec1	SRR3230824	In	BA10
20140930A_1C83_S13	SC_UCSD_1821	20140930A	In4	In4BA10	Smart+Poly	Small	None	1568-BA10-sec1	SRR3230859	In	BA10
20141001A_1C34_S10	SC_UCSD_2748	20141001A	In4	In4BA10	Smart+Poly	Small	Frozen DMSO	1568-BA10-sec1	SRR5899922	In	BA10
20141001A_1C37_S79	SC_UCSD_2977	20141001A	In4	In4BA10	Smart+Poly	Small	Frozen DMSO	1568-BA10-sec1	SRR5900151	In	BA10
20141001A_1C51_S69	SC_UCSD_3241	20141001A	In4	In4BA10	Smart+Poly	Small	Frozen DMSO	1568-BA10-sec1	SRR5900415	In	BA10
20141001B_1C41_S76	SC_UCSD_3330	20141001B	In4	In4BA10	Smart+Poly	Small	Frozen DMSO	1568-BA10-sec1	SRR5900504	In	BA10
20141001B_1C47_S88	SC_UCSD_1878	20141001B	In4	In4BA10	Smart+Poly	Small	Frozen DMSO	1568-BA10-sec1	SRR5899052	In	BA10
20141001B_1C83_S77	SC_UCSD_3572	20141001B	In4	In4BA10	Smart+Poly	Small	Frozen DMSO	1568-BA10-sec1	SRR5900746	In	BA10
20141002A_1C32_S67	SC_UCSD_2691	20141002A	In4	In4BA10	Smart+Poly	Small	Frozen DMSO	1568-BA10-sec1	SRR5899865	In	BA10
20141008B_1C01_S61	SC_UCSD_3587	20141008B	In4	In4BA17	Smart+Poly	Small	Frozen DMSO	1568-BA17-sec29	SRR5900761	In	BA17
20141014A_1C58_S11	SC_UCSD_3726	20141014A	In4	In4BA22	Smart+Poly	Small	Frozen DMSO	1568-BA22-sec15	SRR5900900	In	BA22
20141014A_1C73_S9	SC_UCSD_2372	20141014A	In4	In4BA22	Smart+Poly	Small	Frozen DMSO	1568-BA22-sec15	SRR5899546	In	BA22
20141014A_1C79_S21	SC_UCSD_3755	20141014A	In4	In4BA22	Smart+Poly	Small	Frozen DMSO	1568-BA22-sec15	SRR5900929	In	BA22
20141015A_1C57_S28	SC_UCSD_2684	20141015A	In4	In4BA10	Smart+Poly	Small	None	1568-BA10-sec1	SRR5899858	In	BA10
20141015B_1C04_S13	SC_UCSD_3107	20141015B	In4	In4BA10	Smart+Poly	Small	None (0.1% Paraformaldehyde treated)	1568-BA10-sec1	SRR5900281	In	BA10
20141015B_1C76_S74	SC_UCSD_2870	20141015B	In4	In4BA10	Smart+Poly	Small	None (0.1% Paraformaldehyde treated)	1568-BA10-sec1	SRR5900044	In	BA10
20141016A_1C48_S23	SC_UCSD_2010	20141016A	In4	In4BA22	Smart+Poly	Small	Frozen DMSO	1568-BA22-sec15	SRR5899184	In	BA22
20141016A_1C56_S44	SC_UCSD_1937	20141016A	In4	In4BA22	Smart+Poly	Small	Frozen DMSO	1568-BA22-sec15	SRR5899111	In	BA22
20141016A_1C60_S60	SC_UCSD_3652	20141016A	In4	In4BA22	Smart+Poly	Small	Frozen DMSO	1568-BA22-sec15	SRR5900826	In	BA22
20141016B_1C10_S64	SC_UCSD_3888	20141016B	In4	In4BA22	Smart+Poly	Small	Frozen DMSO	1568-BA22-sec15	SRR5901062	In	BA22
20141016B_1C77_S6	SC_UCSD_2063	20141016B	In4	In4BA22	Smart+Poly	Small	Frozen DMSO	1568-BA22-sec15	SRR5899237	In	BA22
20141021A_1C74_S33	SC_UCSD_3732	20141021A	In4	In4BA22	Smart+Poly	Small	Frozen DMSO	1568-BA22-sec15	SRR5900906	In	BA22
20141021B_1C57_S25	SC_UCSD_3215	20141021B	In4	In4BA22	Smart+Poly	Small	Frozen DMSO	1568-BA22-sec15	SRR5900389	In	BA22
20141022A_1C11_S91	SC_UCSD_2776	20141022A	In4	In4BA41	Smart+Poly	Small	Frozen DMSO	1568-BA41/BA42-sec17	SRR5899950	In	BA41
20141022A_1C28_S43	SC_UCSD_2367	20141022A	In4	In4BA41	Smart+Poly	Small	Frozen DMSO	1568-BA41/BA42-sec17	SRR5899541	In	BA41
20141022A_1C65_S10	SC_UCSD_2498	20141022A	In4	In4BA41	Smart+Poly	Small	Frozen DMSO	1568-BA41/BA42-sec17	SRR5899672	In	BA41
20141022B_1C20_S36	SC_UCSD_3891	20141022B	In4	In4BA10	Smart+Poly	Small	Frozen DMSO	1568-BA10-sec1	SRR5901065	In	BA10
20141022B_1C75_S61	SC_UCSD_3240	20141022B	In4	In4BA10	Smart+Poly	Small	Frozen DMSO	1568-BA10-sec1	SRR5900414	In	BA10
20141027A_1C41_S18	SC_UCSD_3769	20141027A	In4	In4BA21	Smart+Poly	Small	Frozen DMSO	1568-BA21-sec15	SRR5900943	In	BA21
20141028B_1C64_S24	SC_UCSD_3642	20141028B	In4	In4BA17	Smart+Poly	Small	Frozen DMSO	1568-BA17-sec29	SRR5900816	In	BA17
20141029A_1C09_S50	SC_UCSD_3580	20141029A	In4	In4BA17	Smart+Poly	Small	Frozen DMSO	1568-BA17-sec29	SRR5900754	In	BA17
20141112B_1C02_S7	SC_UCSD_3738	20141112B	In4	In4BA10	Smart+Poly	Small	Frozen DMSO	1568-BA10-sec1	SRR5900912	In	BA10
20141113B_1C03_S67	SC_UCSD_3256	20141113B	In4	In4BA41	Smart+Poly	Small	Frozen DMSO	1568-BA41/BA42-sec17	SRR5900430	In	BA41
20141117A_1C07_S87	SC_UCSD_1987	20141117A	In4	In4BA41	Smart+Poly	Small	Frozen DMSO	1568-BA41/BA42-sec17	SRR5899161	In	BA41
20141117A_1C11_S19	SC_UCSD_2946	20141117A	In4	In4BA41	Smart+Poly	Small	Frozen DMSO	1568-BA41/BA42-sec17	SRR5900120	In	BA41
20141117B_1C62_S72	SC_UCSD_3502	20141117B	In4	In4BA41	Smart+Poly	Small	Frozen DMSO	1568-BA41/BA42-sec17	SRR5900676	In	BA41
20141118A_1C76_S10	SC_UCSD_2373	20141118A	In4	In4BA41	Smart+Poly	Small	Frozen DMSO	1568-BA41/BA42-sec17	SRR5899547	In	BA41
20141202B_1C14_S57	SC_UCSD_3185	20141202B	In4	In4BA41	Smart+Poly	Small	Frozen DMSO	1568-BA41/BA42-sec17	SRR5900359	In	BA41
20141202B_1C59_S14	SC_UCSD_3282	20141202B	In4	In4BA41	Smart+Poly	Small	Frozen DMSO	1568-BA41/BA42-sec17	SRR5900456	In	BA41
20141203B_1C28_S11	SC_UCSD_2753	20141203B	In4	In4BA41	Smart+Poly	Small	Frozen DMSO	1568-BA41/BA42-sec17	SRR5899927	In	BA41
20141203B_1C89_S25	SC_UCSD_3575	20141203B	In4	In4BA41	Smart+Poly	Small	Frozen DMSO	1568-BA41/BA42-sec17	SRR5900749	In	BA41
20141204A_1C45_S87	SC_UCSD_2033	20141204A	In4	In4BA41	Smart+Poly	Small	Frozen DMSO	1568-BA41/BA42-sec17	SRR5899207	In	BA41
20141204B_1C27_S95	SC_UCSD_3610	20141204B	In4	In4BA41	Smart+Poly	Small	Frozen DMSO	1568-BA41/BA42-sec17	SRR5900784	In	BA41
20141204B_1C52_S71	SC_UCSD_2278	20141204B	In4	In4BA41	Smart+Poly	Small	Frozen DMSO	1568-BA41/BA42-sec17	SRR5899452	In	BA41
20141208B_1C05_S21	SC_UCSD_2433	20141208B	In4	In4BA41	Smart+Poly	Small	Frozen DMSO	1568-BA41/BA42-sec17	SRR5899607	In	BA41
20141210A_1C42_S13	SC_UCSD_3179	20141210A	In4	In4BA10	Smart+Poly	Small	Frozen DMSO	1568-BA10-sec1	SRR5900353	In	BA10
20141210A_1C78_S61	SC_UCSD_2149	20141210A	In4	In4BA10	Smart+Poly	Small	Frozen DMSO	1568-BA10-sec1	SRR5899323	In	BA10
20141210B_1C43_S27	SC_UCSD_3460	20141210B	In4	In4BA10	Smart+Poly	Small	Frozen DMSO	1568-BA10-sec1	SRR5900634	In	BA10
20141211A_1C30_S48	SC_UCSD_3867	20141211A	In4	In4BA10	Smart+Poly	Small	Frozen DMSO	1568-BA10-sec1	SRR5901041	In	BA10
20141211A_1C88_S16	SC_UCSD_3741	20141211A	In4	In4BA10	Smart+Poly	Small	Frozen DMSO	1568-BA10-sec1	SRR5900915	In	BA10
20141211B_1C17_S21	SC_UCSD_3148	20141211B	In4	In4BA10	Smart+Poly	Small	Frozen DMSO	1568-BA10-sec1	SRR5900322	In	BA10
20150112A_1C55_S93	SC_UCSD_3380	20150112A	In4	In4BA17	Smart+Poly	Small	Frozen DMSO	1568-BA17-sec29	SRR5900554	In	BA17
20150112A_1C61_S10	SC_UCSD_2741	20150112A	In4	In4BA17	Smart+Poly	Small	Frozen DMSO	1568-BA17-sec29	SRR5899915	In	BA17
20150112A_1C86_S11	SC_UCSD_3555	20150112A	In4	In4BA17	Smart+Poly	Small	Frozen DMSO	1568-BA17-sec29	SRR5900729	In	BA17
20150112B_1C12_S9	SC_UCSD_2507	20150112B	In4	In4BA17	Smart+Poly	Small	Frozen DMSO	1568-BA17-sec29	SRR5899681	In	BA17
20150112B_1C40_S57	SC_UCSD_3728	20150112B	In4	In4BA17	Smart+Poly	Small	Frozen DMSO	1568-BA17-sec29	SRR5900902	In	BA17
20150112B_1C72_S48	SC_UCSD_3377	20150112B	In4	In4BA17	Smart+Poly	Small	Frozen DMSO	1568-BA17-sec29	SRR5900551	In	BA17
20131219_1C63	SC_UCSD_98	20131219	In5	In5BA8	Smart	Medium	None	1568-BA8-sec7	SRR1763997	In	BA8
20140123_1C54_S108	SC_UCSD_239	20140123	In5	In5BA8	Smart+	Medium	None	1568-BA8-sec7	SRR1764132	In	BA8
20140123_1C55_S112	SC_UCSD_397	20140123	In5	In5BA8	Smart+	Medium	None	1568-BA8-sec7	SRR1764276	In	BA8
20140123_1C74_S149	SC_UCSD_17	20140123	In5	In5BA8	Smart+	Medium	None	1568-BA8-sec7	SRR1763923	In	BA8
20140213_1C50_S5	SC_UCSD_275	20140213	In5	In5BA8	Smart+	Medium	None	1568-BA8-sec7	SRR1764166	In	BA8
20140220_1C86	SC_UCSD_34	20140220	In5	In5BA8	Smart+	Medium	None	1568-BA8-sec9	SRR1763939	In	BA8
20140227_1C07_S15	SC_UCSD_351	20140227	In5	In5BA8	Smart+	Medium	None	1568-BA8-sec9	SRR1764233	In	BA8
20140227_1C13_S27	SC_UCSD_152	20140227	In5	In5BA8	Smart+	Medium	None	1568-BA8-sec9	SRR1764049	In	BA8
20140227_1C80_S65	SC_UCSD_377	20140227	In5	In5BA8	Smart+	Medium	None	1568-BA8-sec9	SRR1764258	In	BA8
20140311_1C11_S20	SC_UCSD_607	20140311	In5	In5BA8	Smart+	Medium	None	1568-BA8-sec9	SRR2137121	In	BA8
20140311_1C81_S64	SC_UCSD_682	20140311	In5	In5BA8	Smart+	Medium	None	1568-BA8-sec9	SRR2137196	In	BA8
20140313_1C62_S29	SC_UCSD_728	20140313	In5	In5BA8	Smart+	Medium	None	1568-BA8-sec9	SRR2137242	In	BA8
20140313_1C63_S30	SC_UCSD_667	20140313	In5	In5BA8	Smart+	Medium	None	1568-BA8-sec9	SRR2137181	In	BA8
20140313_1C72_S48	SC_UCSD_953	20140313	In5	In5BA8	Smart+	Medium	None	1568-BA8-sec9	SRR2137467	In	BA8
20140317_1C83_S71	SC_UCSD_889	20140317	In5	In5BA8	Smart+	Medium	Frozen DMSO	1568-BA8-sec9	SRR2137403	In	BA8
20140320_1C03_S1	SC_UCSD_553	20140320	In5	In5BA8	Smart+	Medium	None	1568-BA8-sec9	SRR2137067	In	BA8
20140321_1C30_S57	SC_UCSD_1050	20140321	In5	In5BA8	Smart+	Medium	Frozen Glycerol	1568-BA8-sec9	SRR2137564	In	BA8
20140321_1C47_S92	SC_UCSD_724	20140321	In5	In5BA8	Smart+	Medium	Frozen Glycerol	1568-BA8-sec9	SRR2137238	In	BA8
20140326_1C56_S22	SC_UCSD_995	20140326	In5	In5BA8	Smart+	Medium	Frozen DMSO	1568-BA8-sec9	SRR2137509	In	BA8
20140331_1C09_S32	SC_UCSD_635	20140331	In5	In5BA8	Smart+	Small	Frozen DMSO	1568-BA8-sec9	SRR2137149	In	BA8
20140402_1C01_S74	SC_UCSD_1096	20140402	In5	In5BA8	Smart+Poly	Small	Frozen DMSO	1568-BA8-sec9	SRR2137610	In	BA8
20140415_1C53_S148	SC_UCSD_1161	20140415	In5	In5BA21	Smart+	Small	None	1568-BA21-sec15	SRR3230200	In	BA21
20140501_1C45_S19	SC_UCSD_1199	20140501	In5	In5BA21	Smart+	Small	Frozen DMSO	1568-BA21-sec15	SRR3230238	In	BA21
20140702_1C17_S41	SC_UCSD_893	20140702	In5	In5BA8	Smart+	Small	Frozen DMSO	1568-BA8-sec9	SRR2137407	In	BA8
20140715_1C71_S83	SC_UCSD_1290	20140715	In5	In5BA21	Smart+	Small	Frozen DMSO	1568-BA21-sec15	SRR3230329	In	BA21
20140715_1C90_S80	SC_UCSD_3951	20140715	In5	In5BA21	Smart+	Small	Frozen DMSO	1568-BA21-sec15	SRR5897272	In	BA21
20140715_1C93_S51	SC_UCSD_1264	20140715	In5	In5BA21	Smart+	Small	Frozen DMSO	1568-BA21-sec15	SRR3230303	In	BA21
20140716_1C53_S56	SC_UCSD_1348	20140716	In5	In5BA21	Smart+	Small	Frozen DMSO	1568-BA21-sec15	SRR3230387	In	BA21
20140716_1C65_S58	SC_UCSD_1355	20140716	In5	In5BA21	Smart+	Small	Frozen DMSO	1568-BA21-sec15	SRR3230394	In	BA21
20140722_1C73_S96	SC_UCSD_3955	20140722	In5	In5BA21	Smart+	Small	Frozen DMSO	1568-BA21-sec15	SRR5897276	In	BA21
20140724_1C65_S27	SC_UCSD_1449	20140724	In5	In5BA21	Smart+	Small	Frozen DMSO	1568-BA21-sec15	SRR3230488	In	BA21
20140815A_1C37_S75	SC_UCSD_1574	20140815A	In5	In5BA21	Smart+	Small	Frozen DMSO	1568-BA21-sec15	SRR3230613	In	BA21
20140819_1C77_S69	SC_UCSD_1518	20140819	In5	In5BA41	Smart+	Small	Frozen DMSO	1568-BA41/BA42-sec17	SRR3230557	In	BA41
20140819_1C79_S31	SC_UCSD_1484	20140819	In5	In5BA41	Smart+	Small	Frozen DMSO	1568-BA41/BA42-sec17	SRR3230523	In	BA41
20140819_1C87_S66	SC_UCSD_1500	20140819	In5	In5BA41	Smart+	Small	Frozen DMSO	1568-BA41/BA42-sec17	SRR3230539	In	BA41
20140909A_1C61_S51	SC_UCSD_1729	20140909A	In5	In5BA22	Smart+	Small	Frozen DMSO	1568-BA22-sec15	SRR3230768	In	BA22
20140909A_1C72_S43	SC_UCSD_1737	20140909A	In5	In5BA22	Smart+	Small	Frozen DMSO	1568-BA22-sec15	SRR3230776	In	BA22
20141001B_1C66_S18	SC_UCSD_3022	20141001B	In5	In5BA10	Smart+Poly	Small	Frozen DMSO	1568-BA10-sec1	SRR5900196	In	BA10
20141001B_1C95_S89	SC_UCSD_2783	20141001B	In5	In5BA10	Smart+Poly	Small	Frozen DMSO	1568-BA10-sec1	SRR5899957	In	BA10
20141002A_1C51_S10	SC_UCSD_3907	20141002A	In5	In5BA10	Smart+Poly	Small	Frozen DMSO	1568-BA10-sec1	SRR5901081	In	BA10
20141002A_1C87_S92	SC_UCSD_2298	20141002A	In5	In5BA10	Smart+Poly	Small	Frozen DMSO	1568-BA10-sec1	SRR5899472	In	BA10
20141002B_1C78_S56	SC_UCSD_2330	20141002B	In5	In5BA10	Smart+Poly	Small	Frozen DMSO	1568-BA10-sec1	SRR5899504	In	BA10
20141002B_1C85_S63	SC_UCSD_2039	20141002B	In5	In5BA10	Smart+Poly	Small	Frozen DMSO	1568-BA10-sec1	SRR5899213	In	BA10
20141002B_1C95_S49	SC_UCSD_3600	20141002B	In5	In5BA10	Smart+Poly	Small	Frozen DMSO	1568-BA10-sec1	SRR5900774	In	BA10
20141008A_1C32_S24	SC_UCSD_2550	20141008A	In5	In5BA17	Smart+Poly	Small	Frozen DMSO	1568-BA17-sec29	SRR5899724	In	BA17
20141014B_1C92_S3	SC_UCSD_3721	20141014B	In5	In5BA22	Smart+Poly	Small	Frozen DMSO	1568-BA22-sec15	SRR5900895	In	BA22
20141015B_1C44_S82	SC_UCSD_3678	20141015B	In5	In5BA10	Smart+Poly	Small	None (0.1% Paraformaldehyde treated)	1568-BA10-sec1	SRR5900852	In	BA10
20141015B_1C78_S73	SC_UCSD_2135	20141015B	In5	In5BA10	Smart+Poly	Small	None (0.1% Paraformaldehyde treated)	1568-BA10-sec1	SRR5899309	In	BA10
20141016A_1C33_S79	SC_UCSD_2288	20141016A	In5	In5BA22	Smart+Poly	Small	Frozen DMSO	1568-BA22-sec15	SRR5899462	In	BA22
20141021A_1C14_S43	SC_UCSD_3339	20141021A	In5	In5BA22	Smart+Poly	Small	Frozen DMSO	1568-BA22-sec15	SRR5900513	In	BA22
20141021B_1C01_S16	SC_UCSD_2223	20141021B	In5	In5BA22	Smart+Poly	Small	Frozen DMSO	1568-BA22-sec15	SRR5899397	In	BA22
20141021B_1C22_S20	SC_UCSD_3658	20141021B	In5	In5BA22	Smart+Poly	Small	Frozen DMSO	1568-BA22-sec15	SRR5900832	In	BA22
20141021B_1C40_S26	SC_UCSD_3629	20141021B	In5	In5BA22	Smart+Poly	Small	Frozen DMSO	1568-BA22-sec15	SRR5900803	In	BA22
20141021B_1C64_S40	SC_UCSD_3550	20141021B	In5	In5BA22	Smart+Poly	Small	Frozen DMSO	1568-BA22-sec15	SRR5900724	In	BA22
20141022A_1C10_S80	SC_UCSD_2211	20141022A	In5	In5BA41	Smart+Poly	Small	Frozen DMSO	1568-BA41/BA42-sec17	SRR5899385	In	BA41
20141028A_1C13_S64	SC_UCSD_3034	20141028A	In5	In5BA21	Smart+Poly	Small	Frozen DMSO	1568-BA21-sec15	SRR5900208	In	BA21
20141028B_1C81_S68	SC_UCSD_2711	20141028B	In5	In5BA17	Smart+Poly	Small	Frozen DMSO	1568-BA17-sec29	SRR5899885	In	BA17
20141113A_1C39_S86	SC_UCSD_3511	20141113A	In5	In5BA41	Smart+Poly	Small	Frozen DMSO	1568-BA41/BA42-sec17	SRR5900685	In	BA41
20141118A_1C65_S36	SC_UCSD_2489	20141118A	In5	In5BA41	Smart+Poly	Small	Frozen DMSO	1568-BA41/BA42-sec17	SRR5899663	In	BA41
20141118B_1C36_S25	SC_UCSD_3309	20141118B	In5	In5BA41	Smart+Poly	Small	Frozen DMSO	1568-BA41/BA42-sec17	SRR5900483	In	BA41
20141204B_1C87_S60	SC_UCSD_2178	20141204B	In5	In5BA41	Smart+Poly	Small	Frozen DMSO	1568-BA41/BA42-sec17	SRR5899352	In	BA41
20141210B_1C26_S63	SC_UCSD_2499	20141210B	In5	In5BA10	Smart+Poly	Small	Frozen DMSO	1568-BA10-sec1	SRR5899673	In	BA10
20131219_1C49	SC_UCSD_191	20131219	In6	In6BA8	Smart	Medium	None	1568-BA8-sec7	SRR1764086	In	BA8
20140123_1C11_S116	SC_UCSD_261	20140123	In6	In6BA8	Smart+	Medium	None	1568-BA8-sec7	SRR1764152	In	BA8
20140123_1C86_S173	SC_UCSD_240	20140123	In6	In6BA8	Smart+	Medium	None	1568-BA8-sec7	SRR1764133	In	BA8
20140205_1C23_S44	SC_UCSD_186	20140205	In6	In6BA8	Smart	Medium	None	1568-BA8-sec9	SRR1764081	In	BA8
20140212_1C69_S42	SC_UCSD_469	20140212	In6	In6BA8	Smart+	Medium	None	1568-BA8-sec9	SRR1764342	In	BA8
20140213_1C16_S33	SC_UCSD_515	20140213	In6	In6BA8	Smart+	Medium	None	1568-BA8-sec7	SRR1764381	In	BA8
20140213_1C23_S44	SC_UCSD_336	20140213	In6	In6BA8	Smart+	Medium	None	1568-BA8-sec7	SRR1764220	In	BA8
20140213_1C38_S74	SC_UCSD_467	20140213	In6	In6BA8	Smart+	Medium	None	1568-BA8-sec7	SRR1764340	In	BA8
20140213_1C60_S24	SC_UCSD_108	20140213	In6	In6BA8	Smart+	Medium	None	1568-BA8-sec7	SRR1764006	In	BA8
20140218_1C32	SC_UCSD_203	20140218	In6	In6BA8	Smart+	Medium	None	1568-BA8-sec7	SRR1764097	In	BA8
20140218_1C36	SC_UCSD_150	20140218	In6	In6BA8	Smart+	Medium	None	1568-BA8-sec7	SRR1764047	In	BA8
20140218_1C73	SC_UCSD_202	20140218	In6	In6BA8	Smart+	Medium	None	1568-BA8-sec7	SRR1764096	In	BA8
20140220_1C42	SC_UCSD_491	20140220	In6	In6BA8	Smart+	Medium	None	1568-BA8-sec9	SRR1764361	In	BA8
20140227_1C11_S20	SC_UCSD_498	20140227	In6	In6BA8	Smart+	Medium	None	1568-BA8-sec9	SRR1764366	In	BA8
20140227_1C63_S30	SC_UCSD_126	20140227	In6	In6BA8	Smart+	Medium	None	1568-BA8-sec9	SRR1764024	In	BA8
20140227_1C67_S40	SC_UCSD_55	20140227	In6	In6BA8	Smart+	Medium	None	1568-BA8-sec9	SRR1763957	In	BA8
20140227_1C75_S52	SC_UCSD_185	20140227	In6	In6BA8	Smart+	Medium	None	1568-BA8-sec9	SRR1764080	In	BA8
20140304_1C03_S1	SC_UCSD_814	20140304	In6	In6BA8	Smart+	Small	None	1568-BA8-sec9	SRR2137328	In	BA8
20140304_1C13_S12	SC_UCSD_588	20140304	In6	In6BA8	Smart+	Small	None	1568-BA8-sec9	SRR2137102	In	BA8
20140304_1C24_S18	SC_UCSD_559	20140304	In6	In6BA8	Smart+	Small	None	1568-BA8-sec9	SRR2137073	In	BA8
20140304_1C31_S21	SC_UCSD_1090	20140304	In6	In6BA8	Smart+	Small	None	1568-BA8-sec9	SRR2137604	In	BA8
20140304_1C33_S22	SC_UCSD_1079	20140304	In6	In6BA8	Smart+	Small	None	1568-BA8-sec9	SRR2137593	In	BA8
20140304_1C34_S25	SC_UCSD_738	20140304	In6	In6BA8	Smart+	Small	None	1568-BA8-sec9	SRR2137252	In	BA8
20140304_1C41_S28	SC_UCSD_924	20140304	In6	In6BA8	Smart+	Small	None	1568-BA8-sec9	SRR2137438	In	BA8
20140304_1C42_S29	SC_UCSD_723	20140304	In6	In6BA8	Smart+	Small	None	1568-BA8-sec9	SRR2137237	In	BA8
20140304_1C46_S35	SC_UCSD_773	20140304	In6	In6BA8	Smart+	Small	None	1568-BA8-sec9	SRR2137287	In	BA8
20140304_1C49_S3	SC_UCSD_918	20140304	In6	In6BA8	Smart+	Small	None	1568-BA8-sec9	SRR2137432	In	BA8
20140304_1C50_S4	SC_UCSD_946	20140304	In6	In6BA8	Smart+	Small	None	1568-BA8-sec9	SRR2137460	In	BA8
20140304_1C51_S5	SC_UCSD_822	20140304	In6	In6BA8	Smart+	Small	None	1568-BA8-sec9	SRR2137336	In	BA8
20140304_1C55_S10	SC_UCSD_550	20140304	In6	In6BA8	Smart+	Small	None	1568-BA8-sec9	SRR2137064	In	BA8
20140304_1C61_S13	SC_UCSD_711	20140304	In6	In6BA8	Smart+	Small	None	1568-BA8-sec9	SRR2137225	In	BA8
20140304_1C65_S15	SC_UCSD_1086	20140304	In6	In6BA8	Smart+	Small	None	1568-BA8-sec9	SRR2137600	In	BA8
20140304_1C73_S20	SC_UCSD_587	20140304	In6	In6BA8	Smart+	Small	None	1568-BA8-sec9	SRR2137101	In	BA8
20140304_1C74_S19	SC_UCSD_894	20140304	In6	In6BA8	Smart+	Small	None	1568-BA8-sec9	SRR2137408	In	BA8
20140304_1C80_S23	SC_UCSD_908	20140304	In6	In6BA8	Smart+	Small	None	1568-BA8-sec9	SRR2137422	In	BA8
20140304_1C83_S27	SC_UCSD_849	20140304	In6	In6BA8	Smart+	Small	None	1568-BA8-sec9	SRR2137363	In	BA8
20140304_1C89_S30	SC_UCSD_910	20140304	In6	In6BA8	Smart+	Small	None	1568-BA8-sec9	SRR2137424	In	BA8
20140311_1C10_S21	SC_UCSD_1014	20140311	In6	In6BA8	Smart+	Medium	None	1568-BA8-sec9	SRR2137528	In	BA8
20140311_1C20_S38	SC_UCSD_761	20140311	In6	In6BA8	Smart+	Medium	None	1568-BA8-sec9	SRR2137275	In	BA8
20140311_1C67_S40	SC_UCSD_785	20140311	In6	In6BA8	Smart+	Medium	None	1568-BA8-sec9	SRR2137299	In	BA8
20140311_1C86_S77	SC_UCSD_840	20140311	In6	In6BA8	Smart+	Medium	None	1568-BA8-sec9	SRR2137354	In	BA8
20140313_1C15_S25	SC_UCSD_988	20140313	In6	In6BA8	Smart+	Medium	None	1568-BA8-sec9	SRR2137502	In	BA8
20140313_1C30_S57	SC_UCSD_561	20140313	In6	In6BA8	Smart+	Medium	None	1568-BA8-sec9	SRR2137075	In	BA8
20140313_1C73_S54	SC_UCSD_1072	20140313	In6	In6BA8	Smart+	Medium	None	1568-BA8-sec9	SRR2137586	In	BA8
20140313_1C76_S60	SC_UCSD_958	20140313	In6	In6BA8	Smart+	Medium	None	1568-BA8-sec9	SRR2137472	In	BA8
20140313_1C86_S77	SC_UCSD_710	20140313	In6	In6BA8	Smart+	Medium	None	1568-BA8-sec9	SRR2137224	In	BA8
20140317_1C12_S19	SC_UCSD_1008	20140317	In6	In6BA8	Smart+	Medium	Frozen DMSO	1568-BA8-sec9	SRR2137522	In	BA8
20140317_1C18_S31	SC_UCSD_661	20140317	In6	In6BA8	Smart+	Medium	Frozen DMSO	1568-BA8-sec9	SRR2137175	In	BA8
20140317_1C39_S75	SC_UCSD_717	20140317	In6	In6BA8	Smart+	Medium	Frozen DMSO	1568-BA8-sec9	SRR2137231	In	BA8
20140317_1C70_S46	SC_UCSD_1056	20140317	In6	In6BA8	Smart+	Medium	Frozen DMSO	1568-BA8-sec9	SRR2137570	In	BA8
20140317_1C80_S65	SC_UCSD_874	20140317	In6	In6BA8	Smart+	Medium	Frozen DMSO	1568-BA8-sec9	SRR2137388	In	BA8
20140320_1C05_S8	SC_UCSD_795	20140320	In6	In6BA8	Smart+	Medium	None	1568-BA8-sec9	SRR2137309	In	BA8
20140320_1C42_S81	SC_UCSD_565	20140320	In6	In6BA8	Smart+	Medium	None	1568-BA8-sec9	SRR2137079	In	BA8
20140321_1C45_S87	SC_UCSD_663	20140321	In6	In6BA8	Smart+	Medium	Frozen Glycerol	1568-BA8-sec9	SRR2137177	In	BA8
20140321_1C58_S22	SC_UCSD_645	20140321	In6	In6BA8	Smart+	Medium	Frozen Glycerol	1568-BA8-sec9	SRR2137159	In	BA8
20140326_1C13_S13	SC_UCSD_848	20140326	In6	In6BA8	Smart+	Medium	Frozen DMSO	1568-BA8-sec9	SRR2137362	In	BA8
20140326_1C18_S35	SC_UCSD_824	20140326	In6	In6BA8	Smart+	Medium	Frozen DMSO	1568-BA8-sec9	SRR2137338	In	BA8
20140326_1C63_S29	SC_UCSD_841	20140326	In6	In6BA8	Smart+	Medium	Frozen DMSO	1568-BA8-sec9	SRR2137355	In	BA8
20140326_1C67_S19	SC_UCSD_1019	20140326	In6	In6BA8	Smart+	Medium	Frozen DMSO	1568-BA8-sec9	SRR2137533	In	BA8
20140326_1C69_S30	SC_UCSD_1067	20140326	In6	In6BA8	Smart+	Medium	Frozen DMSO	1568-BA8-sec9	SRR2137581	In	BA8
20140331_1C01_S19	SC_UCSD_737	20140331	In6	In6BA8	Smart+	Small	Frozen DMSO	1568-BA8-sec9	SRR2137251	In	BA8
20140331_1C30_S7	SC_UCSD_807	20140331	In6	In6BA8	Smart+	Small	Frozen DMSO	1568-BA8-sec9	SRR2137321	In	BA8
20140331_1C50_S31	SC_UCSD_1037	20140331	In6	In6BA8	Smart+	Small	Frozen DMSO	1568-BA8-sec9	SRR2137551	In	BA8
20140331_1C87_S30	SC_UCSD_1053	20140331	In6	In6BA8	Smart+	Small	Frozen DMSO	1568-BA8-sec9	SRR2137567	In	BA8
20140402_1C10_S85	SC_UCSD_873	20140402	In6	In6BA8	Smart+Poly	Small	Frozen DMSO	1568-BA8-sec9	SRR2137387	In	BA8
20140402_1C58_S87	SC_UCSD_643	20140402	In6	In6BA8	Smart+Poly	Small	Frozen DMSO	1568-BA8-sec9	SRR2137157	In	BA8
20140402_1C59_S89	SC_UCSD_932	20140402	In6	In6BA8	Smart+Poly	Small	Frozen DMSO	1568-BA8-sec9	SRR2137446	In	BA8
20140402_1C77_S78	SC_UCSD_685	20140402	In6	In6BA8	Smart+Poly	Small	Frozen DMSO	1568-BA8-sec9	SRR2137199	In	BA8
20140415_1C06_S131	SC_UCSD_1173	20140415	In6	In6BA21	Smart+	Small	None	1568-BA21-sec15	SRR3230212	In	BA21
20140415_1C21_S113	SC_UCSD_1160	20140415	In6	In6BA21	Smart+	Small	None	1568-BA21-sec15	SRR3230199	In	BA21
20140415_1C65_S150	SC_UCSD_1166	20140415	In6	In6BA21	Smart+	Small	None	1568-BA21-sec15	SRR3230205	In	BA21
20140415_1C85_S130	SC_UCSD_1167	20140415	In6	In6BA21	Smart+	Small	None	1568-BA21-sec15	SRR3230206	In	BA21
20140415_1C89_S152	SC_UCSD_1151	20140415	In6	In6BA21	Smart+	Small	None	1568-BA21-sec15	SRR3230190	In	BA21
20140422_1C06_S26	SC_UCSD_2287	20140422	In6	In6BA22	Smart+	Small	None	1568-BA22-sec15	SRR5899461	In	BA22
20140422_1C44_S8	SC_UCSD_2945	20140422	In6	In6BA22	Smart+	Small	None	1568-BA22-sec15	SRR5900119	In	BA22
20140422_1C51_S23	SC_UCSD_1960	20140422	In6	In6BA22	Smart+	Small	None	1568-BA22-sec15	SRR5899134	In	BA22
20140424_1C01_S55	SC_UCSD_3066	20140424	In6	In6BA41	Smart+	Small	None	1568-BA41/BA42-sec17	SRR5900240	In	BA41
20140424_1C64_S89	SC_UCSD_3706	20140424	In6	In6BA41	Smart+	Small	None	1568-BA41/BA42-sec17	SRR5900880	In	BA41
20140424_1C85_S75	SC_UCSD_1958	20140424	In6	In6BA41	Smart+	Small	None	1568-BA41/BA42-sec17	SRR5899132	In	BA41
20140501_1C06_S30	SC_UCSD_1198	20140501	In6	In6BA21	Smart+	Small	Frozen DMSO	1568-BA21-sec15	SRR3230237	In	BA21
20140501_1C12_S31	SC_UCSD_1195	20140501	In6	In6BA21	Smart+	Small	Frozen DMSO	1568-BA21-sec15	SRR3230234	In	BA21
20140501_1C32_S16	SC_UCSD_1194	20140501	In6	In6BA21	Smart+	Small	Frozen DMSO	1568-BA21-sec15	SRR3230233	In	BA21
20140501_1C46_S35	SC_UCSD_1231	20140501	In6	In6BA21	Smart+	Small	Frozen DMSO	1568-BA21-sec15	SRR3230270	In	BA21
20140501_1C96_S50	SC_UCSD_1193	20140501	In6	In6BA21	Smart+	Small	Frozen DMSO	1568-BA21-sec15	SRR3230232	In	BA21
20140605_1C16_S59	SC_UCSD_1245	20140605	In6	In6BA22	Smart+	Small	Frozen DMSO	1568-BA22-sec15	SRR3230284	In	BA22
20140605_1C50_S57	SC_UCSD_1238	20140605	In6	In6BA22	Smart+	Small	Frozen DMSO	1568-BA22-sec15	SRR3230277	In	BA22
20140702_1C09_S7	SC_UCSD_646	20140702	In6	In6BA8	Smart+	Small	Frozen DMSO	1568-BA8-sec9	SRR2137160	In	BA8
20140702_1C37_S9	SC_UCSD_919	20140702	In6	In6BA8	Smart+	Small	Frozen DMSO	1568-BA8-sec9	SRR2137433	In	BA8
20140702_1C38_S15	SC_UCSD_933	20140702	In6	In6BA8	Smart+	Small	Frozen DMSO	1568-BA8-sec9	SRR2137447	In	BA8
20140702_1C40_S38	SC_UCSD_772	20140702	In6	In6BA8	Smart+	Small	Frozen DMSO	1568-BA8-sec9	SRR2137286	In	BA8
20140702_1C57_S29	SC_UCSD_578	20140702	In6	In6BA8	Smart+	Small	Frozen DMSO	1568-BA8-sec9	SRR2137092	In	BA8
20140702_1C61_S21	SC_UCSD_582	20140702	In6	In6BA8	Smart+	Small	Frozen DMSO	1568-BA8-sec9	SRR2137096	In	BA8
20140702_1C71_S52	SC_UCSD_960	20140702	In6	In6BA8	Smart+	Small	Frozen DMSO	1568-BA8-sec9	SRR2137474	In	BA8
20140702_1C77_S53	SC_UCSD_1001	20140702	In6	In6BA8	Smart+	Small	Frozen DMSO	1568-BA8-sec9	SRR2137515	In	BA8
20140708_1C18_S96	SC_UCSD_544	20140708	In6	In6BA8	Smart+Poly	Small	Frozen DMSO	1568-BA8-sec9	SRR2137058	In	BA8
20140715_1C18_S64	SC_UCSD_1267	20140715	In6	In6BA21	Smart+	Small	Frozen DMSO	1568-BA21-sec15	SRR3230306	In	BA21
20140715_1C34_S66	SC_UCSD_1292	20140715	In6	In6BA21	Smart+	Small	Frozen DMSO	1568-BA21-sec15	SRR3230331	In	BA21
20140715_1C52_S76	SC_UCSD_3939	20140715	In6	In6BA21	Smart+	Small	Frozen DMSO	1568-BA21-sec15	SRR5897260	In	BA21
20140715_1C70_S78	SC_UCSD_1272	20140715	In6	In6BA21	Smart+	Small	Frozen DMSO	1568-BA21-sec15	SRR3230311	In	BA21
20140716_1C28_S35	SC_UCSD_1342	20140716	In6	In6BA21	Smart+	Small	Frozen DMSO	1568-BA21-sec15	SRR3230381	In	BA21
20140716_1C78_S52	SC_UCSD_1359	20140716	In6	In6BA21	Smart+	Small	Frozen DMSO	1568-BA21-sec15	SRR3230398	In	BA21
20140716_1C84_S53	SC_UCSD_1336	20140716	In6	In6BA21	Smart+	Small	Frozen DMSO	1568-BA21-sec15	SRR3230375	In	BA21
20140722_1C26_S76	SC_UCSD_1381	20140722	In6	In6BA21	Smart+	Small	Frozen DMSO	1568-BA21-sec15	SRR3230420	In	BA21
20140722_1C50_S86	SC_UCSD_1369	20140722	In6	In6BA21	Smart+	Small	Frozen DMSO	1568-BA21-sec15	SRR3230408	In	BA21
20140722_1C56_S87	SC_UCSD_1387	20140722	In6	In6BA21	Smart+	Small	Frozen DMSO	1568-BA21-sec15	SRR3230426	In	BA21
20140723_1C63_S64	SC_UCSD_1388	20140723	In6	In6BA21	Smart+	Small	Frozen DMSO	1568-BA21-sec15	SRR3230427	In	BA21
20140723_1C76_S80	SC_UCSD_1423	20140723	In6	In6BA21	Smart+	Small	Frozen DMSO	1568-BA21-sec15	SRR3230462	In	BA21
20140723_1C85_S17	SC_UCSD_1392	20140723	In6	In6BA21	Smart+	Small	Frozen DMSO	1568-BA21-sec15	SRR3230431	In	BA21
20140723_1C86_S40	SC_UCSD_1415	20140723	In6	In6BA21	Smart+	Small	Frozen DMSO	1568-BA21-sec15	SRR3230454	In	BA21
20140724_1C57_S36	SC_UCSD_1481	20140724	In6	In6BA21	Smart+	Small	Frozen DMSO	1568-BA21-sec15	SRR3230520	In	BA21
20140815A_1C08_S16	SC_UCSD_1568	20140815A	In6	In6BA21	Smart+	Small	Frozen DMSO	1568-BA21-sec15	SRR3230607	In	BA21
20140815A_1C35_S67	SC_UCSD_1554	20140815A	In6	In6BA21	Smart+	Small	Frozen DMSO	1568-BA21-sec15	SRR3230593	In	BA21
20140815A_1C41_S79	SC_UCSD_1588	20140815A	In6	In6BA21	Smart+	Small	Frozen DMSO	1568-BA21-sec15	SRR3230627	In	BA21
20140815A_1C64_S56	SC_UCSD_1556	20140815A	In6	In6BA21	Smart+	Small	Frozen DMSO	1568-BA21-sec15	SRR3230595	In	BA21
20140815A_1C91_S54	SC_UCSD_1604	20140815A	In6	In6BA21	Smart+	Small	Frozen DMSO	1568-BA21-sec15	SRR3230643	In	BA21
20140815B_1C14_S23	SC_UCSD_1645	20140815B	In6	In6BA21	Smart+	Small	Frozen DMSO	1568-BA21-sec15	SRR3230684	In	BA21
20140815B_1C76_S60	SC_UCSD_1605	20140815B	In6	In6BA21	Smart+	Small	Frozen DMSO	1568-BA21-sec15	SRR3230644	In	BA21
20140815B_1C90_S48	SC_UCSD_1623	20140815B	In6	In6BA21	Smart+	Small	Frozen DMSO	1568-BA21-sec15	SRR3230662	In	BA21
20140819_1C35_S44	SC_UCSD_1509	20140819	In6	In6BA41	Smart+	Small	Frozen DMSO	1568-BA41/BA42-sec17	SRR3230548	In	BA41
20140819_1C80_S90	SC_UCSD_1496	20140819	In6	In6BA41	Smart+	Small	Frozen DMSO	1568-BA41/BA42-sec17	SRR3230535	In	BA41
20140826_1C53_S50	SC_UCSD_1552	20140826	In6	In6BA41	Smart+	Small	Frozen DMSO	1568-BA41/BA42-sec17	SRR3230591	In	BA41
20140909A_1C58_S54	SC_UCSD_1757	20140909A	In6	In6BA22	Smart+	Small	Frozen DMSO	1568-BA22-sec15	SRR3230796	In	BA22
20140909A_1C81_S75	SC_UCSD_1745	20140909A	In6	In6BA22	Smart+	Small	Frozen DMSO	1568-BA22-sec15	SRR3230784	In	BA22
20140909B_1C38_S77	SC_UCSD_1764	20140909B	In6	In6BA41	Smart+	Small	None	1568-BA41/BA42-sec17	SRR3230803	In	BA41
20140909B_1C42_S43	SC_UCSD_1768	20140909B	In6	In6BA41	Smart+	Small	None	1568-BA41/BA42-sec17	SRR3230807	In	BA41
20141002A_1C42_S83	SC_UCSD_3211	20141002A	In6	In6BA10	Smart+Poly	Small	Frozen DMSO	1568-BA10-sec1	SRR5900385	In	BA10
20141008A_1C43_S58	SC_UCSD_3780	20141008A	In6	In6BA17	Smart+Poly	Small	Frozen DMSO	1568-BA17-sec29	SRR5900954	In	BA17
20141008A_1C62_S7	SC_UCSD_2501	20141008A	In6	In6BA17	Smart+Poly	Small	Frozen DMSO	1568-BA17-sec29	SRR5899675	In	BA17
20141008A_1C91_S34	SC_UCSD_3793	20141008A	In6	In6BA17	Smart+Poly	Small	Frozen DMSO	1568-BA17-sec29	SRR5900967	In	BA17
20141008B_1C27_S85	SC_UCSD_2688	20141008B	In6	In6BA17	Smart+Poly	Small	Frozen DMSO	1568-BA17-sec29	SRR5899862	In	BA17
20141008B_1C33_S2	SC_UCSD_2389	20141008B	In6	In6BA17	Smart+Poly	Small	Frozen DMSO	1568-BA17-sec29	SRR5899563	In	BA17
20141008B_1C39_S14	SC_UCSD_2115	20141008B	In6	In6BA17	Smart+Poly	Small	Frozen DMSO	1568-BA17-sec29	SRR5899289	In	BA17
20141008B_1C76_S89	SC_UCSD_3017	20141008B	In6	In6BA17	Smart+Poly	Small	Frozen DMSO	1568-BA17-sec29	SRR5900191	In	BA17
20141008B_1C90_S5	SC_UCSD_2285	20141008B	In6	In6BA17	Smart+Poly	Small	Frozen DMSO	1568-BA17-sec29	SRR5899459	In	BA17
20141014A_1C72_S36	SC_UCSD_2757	20141014A	In6	In6BA22	Smart+Poly	Small	Frozen DMSO	1568-BA22-sec15	SRR5899931	In	BA22
20141015A_1C33_S62	SC_UCSD_3563	20141015A	In6	In6BA10	Smart+Poly	Small	None	1568-BA10-sec1	SRR5900737	In	BA10
20141015A_1C44_S26	SC_UCSD_2247	20141015A	In6	In6BA10	Smart+Poly	Small	None	1568-BA10-sec1	SRR5899421	In	BA10
20141015A_1C76_S80	SC_UCSD_3424	20141015A	In6	In6BA10	Smart+Poly	Small	None	1568-BA10-sec1	SRR5900598	In	BA10
20141016A_1C03_S42	SC_UCSD_2949	20141016A	In6	In6BA22	Smart+Poly	Small	Frozen DMSO	1568-BA22-sec15	SRR5900123	In	BA22
20141016A_1C06_S45	SC_UCSD_2817	20141016A	In6	In6BA22	Smart+Poly	Small	Frozen DMSO	1568-BA22-sec15	SRR5899991	In	BA22
20141016A_1C07_S43	SC_UCSD_3265	20141016A	In6	In6BA22	Smart+Poly	Small	Frozen DMSO	1568-BA22-sec15	SRR5900439	In	BA22
20141016A_1C19_S55	SC_UCSD_3415	20141016A	In6	In6BA22	Smart+Poly	Small	Frozen DMSO	1568-BA22-sec15	SRR5900589	In	BA22
20141016A_1C58_S35	SC_UCSD_3246	20141016A	In6	In6BA22	Smart+Poly	Small	Frozen DMSO	1568-BA22-sec15	SRR5900420	In	BA22
20141016A_1C76_S72	SC_UCSD_3788	20141016A	In6	In6BA22	Smart+Poly	Small	Frozen DMSO	1568-BA22-sec15	SRR5900962	In	BA22
20141016B_1C05_S4	SC_UCSD_2890	20141016B	In6	In6BA22	Smart+Poly	Small	Frozen DMSO	1568-BA22-sec15	SRR5900064	In	BA22
20141021A_1C32_S67	SC_UCSD_3395	20141021A	In6	In6BA22	Smart+Poly	Small	Frozen DMSO	1568-BA22-sec15	SRR5900569	In	BA22
20141021A_1C38_S79	SC_UCSD_3245	20141021A	In6	In6BA22	Smart+Poly	Small	Frozen DMSO	1568-BA22-sec15	SRR5900419	In	BA22
20141021A_1C82_S96	SC_UCSD_2467	20141021A	In6	In6BA22	Smart+Poly	Small	Frozen DMSO	1568-BA22-sec15	SRR5899641	In	BA22
20141022A_1C69_S42	SC_UCSD_2037	20141022A	In6	In6BA41	Smart+Poly	Small	Frozen DMSO	1568-BA41/BA42-sec17	SRR5899211	In	BA41
20141022B_1C04_S87	SC_UCSD_3042	20141022B	In6	In6BA10	Smart+Poly	Small	Frozen DMSO	1568-BA10-sec1	SRR5900216	In	BA10
20141022B_1C17_S63	SC_UCSD_3385	20141022B	In6	In6BA10	Smart+Poly	Small	Frozen DMSO	1568-BA10-sec1	SRR5900559	In	BA10
20141022B_1C46_S39	SC_UCSD_2184	20141022B	In6	In6BA10	Smart+Poly	Small	Frozen DMSO	1568-BA10-sec1	SRR5899358	In	BA10
20141027B_1C08_S56	SC_UCSD_2690	20141027B	In6	In6BA21	Smart+Poly	Small	Frozen DMSO	1568-BA21-sec15	SRR5899864	In	BA21
20141027B_1C42_S61	SC_UCSD_2558	20141027B	In6	In6BA21	Smart+Poly	Small	Frozen DMSO	1568-BA21-sec15	SRR5899732	In	BA21
20141027B_1C70_S2	SC_UCSD_3688	20141027B	In6	In6BA21	Smart+Poly	Small	Frozen DMSO	1568-BA21-sec15	SRR5900862	In	BA21
20141028A_1C25_S75	SC_UCSD_3327	20141028A	In6	In6BA21	Smart+Poly	Small	Frozen DMSO	1568-BA21-sec15	SRR5900501	In	BA21
20141028B_1C43_S78	SC_UCSD_2876	20141028B	In6	In6BA17	Smart+Poly	Small	Frozen DMSO	1568-BA17-sec29	SRR5900050	In	BA17
20141028B_1C94_S26	SC_UCSD_3643	20141028B	In6	In6BA17	Smart+Poly	Small	Frozen DMSO	1568-BA17-sec29	SRR5900817	In	BA17
20141029A_1C59_S55	SC_UCSD_2597	20141029A	In6	In6BA17	Smart+Poly	Small	Frozen DMSO	1568-BA17-sec29	SRR5899771	In	BA17
20141029B_1C14_S9	SC_UCSD_2672	20141029B	In6	In6BA41	Smart+Poly	Small	Frozen DMSO	1568-BA41/BA42-sec17	SRR5899846	In	BA41
20141029B_1C57_S94	SC_UCSD_3660	20141029B	In6	In6BA41	Smart+Poly	Small	Frozen DMSO	1568-BA41/BA42-sec17	SRR5900834	In	BA41
20141029B_1C62_S46	SC_UCSD_3541	20141029B	In6	In6BA41	Smart+Poly	Small	Frozen DMSO	1568-BA41/BA42-sec17	SRR5900715	In	BA41
20141112B_1C33_S78	SC_UCSD_2999	20141112B	In6	In6BA10	Smart+Poly	Small	Frozen DMSO	1568-BA10-sec1	SRR5900173	In	BA10
20141113A_1C58_S77	SC_UCSD_3062	20141113A	In6	In6BA41	Smart+Poly	Small	Frozen DMSO	1568-BA41/BA42-sec17	SRR5900236	In	BA41
20141113A_1C60_S7	SC_UCSD_1896	20141113A	In6	In6BA41	Smart+Poly	Small	Frozen DMSO	1568-BA41/BA42-sec17	SRR5899070	In	BA41
20141113B_1C15_S91	SC_UCSD_3813	20141113B	In6	In6BA41	Smart+Poly	Small	Frozen DMSO	1568-BA41/BA42-sec17	SRR5900987	In	BA41
20141113B_1C42_S96	SC_UCSD_3789	20141113B	In6	In6BA41	Smart+Poly	Small	Frozen DMSO	1568-BA41/BA42-sec17	SRR5900963	In	BA41
20141117A_1C17_S31	SC_UCSD_2427	20141117A	In6	In6BA41	Smart+Poly	Small	Frozen DMSO	1568-BA41/BA42-sec17	SRR5899601	In	BA41
20141117A_1C37_S15	SC_UCSD_2036	20141117A	In6	In6BA41	Smart+Poly	Small	Frozen DMSO	1568-BA41/BA42-sec17	SRR5899210	In	BA41
20141117B_1C03_S34	SC_UCSD_3584	20141117B	In6	In6BA41	Smart+Poly	Small	Frozen DMSO	1568-BA41/BA42-sec17	SRR5900758	In	BA41
20141117B_1C12_S2	SC_UCSD_3851	20141117B	In6	In6BA41	Smart+Poly	Small	Frozen DMSO	1568-BA41/BA42-sec17	SRR5901025	In	BA41
20141117B_1C34_S38	SC_UCSD_2359	20141117B	In6	In6BA41	Smart+Poly	Small	Frozen DMSO	1568-BA41/BA42-sec17	SRR5899533	In	BA41
20141117B_1C35_S15	SC_UCSD_3698	20141117B	In6	In6BA41	Smart+Poly	Small	Frozen DMSO	1568-BA41/BA42-sec17	SRR5900872	In	BA41
20141117B_1C46_S62	SC_UCSD_3431	20141117B	In6	In6BA41	Smart+Poly	Small	Frozen DMSO	1568-BA41/BA42-sec17	SRR5900605	In	BA41
20141117B_1C94_S53	SC_UCSD_2083	20141117B	In6	In6BA41	Smart+Poly	Small	Frozen DMSO	1568-BA41/BA42-sec17	SRR5899257	In	BA41
20141118A_1C01_S90	SC_UCSD_3058	20141118A	In6	In6BA41	Smart+Poly	Small	Frozen DMSO	1568-BA41/BA42-sec17	SRR5900232	In	BA41
20141118A_1C39_S55	SC_UCSD_2021	20141118A	In6	In6BA41	Smart+Poly	Small	Frozen DMSO	1568-BA41/BA42-sec17	SRR5899195	In	BA41
20141118A_1C41_S70	SC_UCSD_2771	20141118A	In6	In6BA41	Smart+Poly	Small	Frozen DMSO	1568-BA41/BA42-sec17	SRR5899945	In	BA41
20141118A_1C45_S67	SC_UCSD_2957	20141118A	In6	In6BA41	Smart+Poly	Small	Frozen DMSO	1568-BA41/BA42-sec17	SRR5900131	In	BA41
20141118A_1C50_S44	SC_UCSD_3534	20141118A	In6	In6BA41	Smart+Poly	Small	Frozen DMSO	1568-BA41/BA42-sec17	SRR5900708	In	BA41
20141118A_1C66_S1	SC_UCSD_3529	20141118A	In6	In6BA41	Smart+Poly	Small	Frozen DMSO	1568-BA41/BA42-sec17	SRR5900703	In	BA41
20141118B_1C21_S52	SC_UCSD_3388	20141118B	In6	In6BA41	Smart+Poly	Small	Frozen DMSO	1568-BA41/BA42-sec17	SRR5900562	In	BA41
20141118B_1C60_S59	SC_UCSD_3193	20141118B	In6	In6BA41	Smart+Poly	Small	Frozen DMSO	1568-BA41/BA42-sec17	SRR5900367	In	BA41
20141118B_1C95_S43	SC_UCSD_3771	20141118B	In6	In6BA41	Smart+Poly	Small	Frozen DMSO	1568-BA41/BA42-sec17	SRR5900945	In	BA41
20141202A_1C18_S17	SC_UCSD_2712	20141202A	In6	In6BA41	Smart+Poly	Small	Frozen DMSO	1568-BA41/BA42-sec17	SRR5899886	In	BA41
20141202A_1C32_S2	SC_UCSD_2058	20141202A	In6	In6BA41	Smart+Poly	Small	Frozen DMSO	1568-BA41/BA42-sec17	SRR5899232	In	BA41
20141202A_1C40_S41	SC_UCSD_3025	20141202A	In6	In6BA41	Smart+Poly	Small	Frozen DMSO	1568-BA41/BA42-sec17	SRR5900199	In	BA41
20141202A_1C85_S88	SC_UCSD_2120	20141202A	In6	In6BA41	Smart+Poly	Small	Frozen DMSO	1568-BA41/BA42-sec17	SRR5899294	In	BA41
20141202B_1C07_S93	SC_UCSD_2589	20141202B	In6	In6BA41	Smart+Poly	Small	Frozen DMSO	1568-BA41/BA42-sec17	SRR5899763	In	BA41
20141202B_1C10_S25	SC_UCSD_3184	20141202B	In6	In6BA41	Smart+Poly	Small	Frozen DMSO	1568-BA41/BA42-sec17	SRR5900358	In	BA41
20141202B_1C17_S96	SC_UCSD_3679	20141202B	In6	In6BA41	Smart+Poly	Small	Frozen DMSO	1568-BA41/BA42-sec17	SRR5900853	In	BA41
20141202B_1C50_S94	SC_UCSD_3653	20141202B	In6	In6BA41	Smart+Poly	Small	Frozen DMSO	1568-BA41/BA42-sec17	SRR5900827	In	BA41
20141202B_1C78_S73	SC_UCSD_2683	20141202B	In6	In6BA41	Smart+Poly	Small	Frozen DMSO	1568-BA41/BA42-sec17	SRR5899857	In	BA41
20141202B_1C85_S83	SC_UCSD_2303	20141202B	In6	In6BA41	Smart+Poly	Small	Frozen DMSO	1568-BA41/BA42-sec17	SRR5899477	In	BA41
20141203A_1C12_S41	SC_UCSD_1966	20141203A	In6	In6BA41	Smart+Poly	Small	Frozen DMSO	1568-BA41/BA42-sec17	SRR5899140	In	BA41
20141203B_1C42_S36	SC_UCSD_2399	20141203B	In6	In6BA41	Smart+Poly	Small	Frozen DMSO	1568-BA41/BA42-sec17	SRR5899573	In	BA41
20141203B_1C57_S10	SC_UCSD_3857	20141203B	In6	In6BA41	Smart+Poly	Small	Frozen DMSO	1568-BA41/BA42-sec17	SRR5901031	In	BA41
20141203B_1C66_S61	SC_UCSD_3841	20141203B	In6	In6BA41	Smart+Poly	Small	Frozen DMSO	1568-BA41/BA42-sec17	SRR5901015	In	BA41
20141204A_1C22_S91	SC_UCSD_2076	20141204A	In6	In6BA41	Smart+Poly	Small	Frozen DMSO	1568-BA41/BA42-sec17	SRR5899250	In	BA41
20141204A_1C26_S86	SC_UCSD_2649	20141204A	In6	In6BA41	Smart+Poly	Small	Frozen DMSO	1568-BA41/BA42-sec17	SRR5899823	In	BA41
20141204A_1C68_S17	SC_UCSD_3108	20141204A	In6	In6BA41	Smart+Poly	Small	Frozen DMSO	1568-BA41/BA42-sec17	SRR5900282	In	BA41
20141204A_1C81_S64	SC_UCSD_2220	20141204A	In6	In6BA41	Smart+Poly	Small	Frozen DMSO	1568-BA41/BA42-sec17	SRR5899394	In	BA41
20141204A_1C82_S93	SC_UCSD_2508	20141204A	In6	In6BA41	Smart+Poly	Small	Frozen DMSO	1568-BA41/BA42-sec17	SRR5899682	In	BA41
20141204B_1C60_S72	SC_UCSD_3730	20141204B	In6	In6BA41	Smart+Poly	Small	Frozen DMSO	1568-BA41/BA42-sec17	SRR5900904	In	BA41
20141208A_1C33_S50	SC_UCSD_2435	20141208A	In6	In6BA41	Smart+Poly	Small	Frozen DMSO	1568-BA41/BA42-sec17	SRR5899609	In	BA41
20141208A_1C42_S7	SC_UCSD_3744	20141208A	In6	In6BA41	Smart+Poly	Small	Frozen DMSO	1568-BA41/BA42-sec17	SRR5900918	In	BA41
20141208A_1C52_S31	SC_UCSD_3347	20141208A	In6	In6BA41	Smart+Poly	Small	Frozen DMSO	1568-BA41/BA42-sec17	SRR5900521	In	BA41
20141208A_1C70_S67	SC_UCSD_2153	20141208A	In6	In6BA41	Smart+Poly	Small	Frozen DMSO	1568-BA41/BA42-sec17	SRR5899327	In	BA41
20141208A_1C81_S51	SC_UCSD_3411	20141208A	In6	In6BA41	Smart+Poly	Small	Frozen DMSO	1568-BA41/BA42-sec17	SRR5900585	In	BA41
20141208B_1C27_S63	SC_UCSD_2116	20141208B	In6	In6BA41	Smart+Poly	Small	Frozen DMSO	1568-BA41/BA42-sec17	SRR5899290	In	BA41
20141208B_1C41_S66	SC_UCSD_2468	20141208B	In6	In6BA41	Smart+Poly	Small	Frozen DMSO	1568-BA41/BA42-sec17	SRR5899642	In	BA41
20141208B_1C67_S19	SC_UCSD_2733	20141208B	In6	In6BA41	Smart+Poly	Small	Frozen DMSO	1568-BA41/BA42-sec17	SRR5899907	In	BA41
20141208B_1C69_S20	SC_UCSD_2450	20141208B	In6	In6BA41	Smart+Poly	Small	Frozen DMSO	1568-BA41/BA42-sec17	SRR5899624	In	BA41
20141210A_1C12_S24	SC_UCSD_2328	20141210A	In6	In6BA10	Smart+Poly	Small	Frozen DMSO	1568-BA10-sec1	SRR5899502	In	BA10
20141210A_1C41_S96	SC_UCSD_2151	20141210A	In6	In6BA10	Smart+Poly	Small	Frozen DMSO	1568-BA10-sec1	SRR5899325	In	BA10
20141210A_1C67_S35	SC_UCSD_2092	20141210A	In6	In6BA10	Smart+Poly	Small	Frozen DMSO	1568-BA10-sec1	SRR5899266	In	BA10
20141210B_1C73_S41	SC_UCSD_3749	20141210B	In6	In6BA10	Smart+Poly	Small	Frozen DMSO	1568-BA10-sec1	SRR5900923	In	BA10
20141211A_1C69_S96	SC_UCSD_2889	20141211A	In6	In6BA10	Smart+Poly	Small	Frozen DMSO	1568-BA10-sec1	SRR5900063	In	BA10
20141211A_1C93_S71	SC_UCSD_3436	20141211A	In6	In6BA10	Smart+Poly	Small	Frozen DMSO	1568-BA10-sec1	SRR5900610	In	BA10
20141211B_1C70_S67	SC_UCSD_3368	20141211B	In6	In6BA10	Smart+Poly	Small	Frozen DMSO	1568-BA10-sec1	SRR5900542	In	BA10
20141211B_1C75_S7	SC_UCSD_2607	20141211B	In6	In6BA10	Smart+Poly	Small	Frozen DMSO	1568-BA10-sec1	SRR5899781	In	BA10
20150108_1C69_S39	SC_UCSD_3097	20150108	In6	In6BA10	Smart+Poly	Small	Frozen DMSO	1568-BA10-sec1	SRR5900271	In	BA10
20150112A_1C70_S38	SC_UCSD_2616	20150112A	In6	In6BA17	Smart+Poly	Small	Frozen DMSO	1568-BA17-sec29	SRR5899790	In	BA17
20150112B_1C73_S44	SC_UCSD_2770	20150112B	In6	In6BA17	Smart+Poly	Small	Frozen DMSO	1568-BA17-sec29	SRR5899944	In	BA17
20150112B_1C77_S71	SC_UCSD_2362	20150112B	In6	In6BA17	Smart+Poly	Small	Frozen DMSO	1568-BA17-sec29	SRR5899536	In	BA17
20150112B_1C82_S72	SC_UCSD_3847	20150112B	In6	In6BA17	Smart+Poly	Small	Frozen DMSO	1568-BA17-sec29	SRR5901021	In	BA17
20140123_1C53_S107	SC_UCSD_276	20140123	In7	In7BA8	Smart+	Medium	None	1568-BA8-sec7	SRR1764167	In	BA8
20140321_1C04_S9	SC_UCSD_575	20140321	In7	In7BA8	Smart+	Medium	Frozen Glycerol	1568-BA8-sec9	SRR2137089	In	BA8
20140402_1C23_S82	SC_UCSD_788	20140402	In7	In7BA8	Smart+Poly	Small	Frozen DMSO	1568-BA8-sec9	SRR2137302	In	BA8
20140402_1C94_S98	SC_UCSD_1089	20140402	In7	In7BA8	Smart+Poly	Small	Frozen DMSO	1568-BA8-sec9	SRR2137603	In	BA8
20140716_1C86_S24	SC_UCSD_1304	20140716	In7	In7BA21	Smart+	Small	Frozen DMSO	1568-BA21-sec15	SRR3230343	In	BA21
20140724_1C04_S73	SC_UCSD_1457	20140724	In7	In7BA21	Smart+	Small	Frozen DMSO	1568-BA21-sec15	SRR3230496	In	BA21
20140724_1C83_S63	SC_UCSD_1480	20140724	In7	In7BA21	Smart+	Small	Frozen DMSO	1568-BA21-sec15	SRR3230519	In	BA21
20140819_1C37_S88	SC_UCSD_3946	20140819	In7	In7BA41	Smart+	Small	Frozen DMSO	1568-BA41/BA42-sec17	SRR5897267	In	BA41
20140909A_1C09_S13	SC_UCSD_3928	20140909A	In7	In7BA22	Smart+	Small	Frozen DMSO	1568-BA22-sec15	SRR5897249	In	BA22
20140909A_1C73_S76	SC_UCSD_1735	20140909A	In7	In7BA22	Smart+	Small	Frozen DMSO	1568-BA22-sec15	SRR3230774	In	BA22
20140909A_1C84_S7	SC_UCSD_1758	20140909A	In7	In7BA22	Smart+	Small	Frozen DMSO	1568-BA22-sec15	SRR3230797	In	BA22
20141008A_1C35_S8	SC_UCSD_1963	20141008A	In7	In7BA17	Smart+Poly	Small	Frozen DMSO	1568-BA17-sec29	SRR5899137	In	BA17
20141008B_1C95_S65	SC_UCSD_3205	20141008B	In7	In7BA17	Smart+Poly	Small	Frozen DMSO	1568-BA17-sec29	SRR5900379	In	BA17
20141014A_1C51_S56	SC_UCSD_3900	20141014A	In7	In7BA22	Smart+Poly	Small	Frozen DMSO	1568-BA22-sec15	SRR5901074	In	BA22
20141014A_1C77_S95	SC_UCSD_2461	20141014A	In7	In7BA22	Smart+Poly	Small	Frozen DMSO	1568-BA22-sec15	SRR5899635	In	BA22
20141014B_1C03_S72	SC_UCSD_3209	20141014B	In7	In7BA22	Smart+Poly	Small	Frozen DMSO	1568-BA22-sec15	SRR5900383	In	BA22
20141015A_1C73_S64	SC_UCSD_3713	20141015A	In7	In7BA10	Smart+Poly	Small	None	1568-BA10-sec1	SRR5900887	In	BA10
20141016A_1C10_S70	SC_UCSD_2699	20141016A	In7	In7BA22	Smart+Poly	Small	Frozen DMSO	1568-BA22-sec15	SRR5899873	In	BA22
20141016A_1C15_S54	SC_UCSD_3602	20141016A	In7	In7BA22	Smart+Poly	Small	Frozen DMSO	1568-BA22-sec15	SRR5900776	In	BA22
20141021A_1C88_S1	SC_UCSD_2922	20141021A	In7	In7BA22	Smart+Poly	Small	Frozen DMSO	1568-BA22-sec15	SRR5900096	In	BA22
20141021B_1C41_S51	SC_UCSD_3770	20141021B	In7	In7BA22	Smart+Poly	Small	Frozen DMSO	1568-BA22-sec15	SRR5900944	In	BA22
20141022A_1C47_S56	SC_UCSD_3757	20141022A	In7	In7BA41	Smart+Poly	Small	Frozen DMSO	1568-BA41/BA42-sec17	SRR5900931	In	BA41
20141022A_1C72_S82	SC_UCSD_2429	20141022A	In7	In7BA41	Smart+Poly	Small	Frozen DMSO	1568-BA41/BA42-sec17	SRR5899603	In	BA41
20141022A_1C86_S18	SC_UCSD_2807	20141022A	In7	In7BA41	Smart+Poly	Small	Frozen DMSO	1568-BA41/BA42-sec17	SRR5899981	In	BA41
20141022A_1C91_S90	SC_UCSD_3384	20141022A	In7	In7BA41	Smart+Poly	Small	Frozen DMSO	1568-BA41/BA42-sec17	SRR5900558	In	BA41
20141022A_1C96_S93	SC_UCSD_2900	20141022A	In7	In7BA41	Smart+Poly	Small	Frozen DMSO	1568-BA41/BA42-sec17	SRR5900074	In	BA41
20141022B_1C38_S60	SC_UCSD_2127	20141022B	In7	In7BA10	Smart+Poly	Small	Frozen DMSO	1568-BA10-sec1	SRR5899301	In	BA10
20141022B_1C64_S28	SC_UCSD_2180	20141022B	In7	In7BA10	Smart+Poly	Small	Frozen DMSO	1568-BA10-sec1	SRR5899354	In	BA10
20141027B_1C07_S92	SC_UCSD_2042	20141027B	In7	In7BA21	Smart+Poly	Small	Frozen DMSO	1568-BA21-sec15	SRR5899216	In	BA21
20141027B_1C90_S38	SC_UCSD_2813	20141027B	In7	In7BA21	Smart+Poly	Small	Frozen DMSO	1568-BA21-sec15	SRR5899987	In	BA21
20141113A_1C06_S64	SC_UCSD_2456	20141113A	In7	In7BA41	Smart+Poly	Small	Frozen DMSO	1568-BA41/BA42-sec17	SRR5899630	In	BA41
20141113A_1C20_S85	SC_UCSD_3804	20141113A	In7	In7BA41	Smart+Poly	Small	Frozen DMSO	1568-BA41/BA42-sec17	SRR5900978	In	BA41
20141113A_1C41_S53	SC_UCSD_3472	20141113A	In7	In7BA41	Smart+Poly	Small	Frozen DMSO	1568-BA41/BA42-sec17	SRR5900646	In	BA41
20141113B_1C11_S95	SC_UCSD_1888	20141113B	In7	In7BA41	Smart+Poly	Small	Frozen DMSO	1568-BA41/BA42-sec17	SRR5899062	In	BA41
20141117A_1C46_S90	SC_UCSD_3031	20141117A	In7	In7BA41	Smart+Poly	Small	Frozen DMSO	1568-BA41/BA42-sec17	SRR5900205	In	BA41
20141117B_1C18_S14	SC_UCSD_2239	20141117B	In7	In7BA41	Smart+Poly	Small	Frozen DMSO	1568-BA41/BA42-sec17	SRR5899413	In	BA41
20141117B_1C55_S12	SC_UCSD_3797	20141117B	In7	In7BA41	Smart+Poly	Small	Frozen DMSO	1568-BA41/BA42-sec17	SRR5900971	In	BA41
20141117B_1C64_S28	SC_UCSD_2629	20141117B	In7	In7BA41	Smart+Poly	Small	Frozen DMSO	1568-BA41/BA42-sec17	SRR5899803	In	BA41
20141117B_1C69_S49	SC_UCSD_2766	20141117B	In7	In7BA41	Smart+Poly	Small	Frozen DMSO	1568-BA41/BA42-sec17	SRR5899940	In	BA41
20141117B_1C95_S5	SC_UCSD_3507	20141117B	In7	In7BA41	Smart+Poly	Small	Frozen DMSO	1568-BA41/BA42-sec17	SRR5900681	In	BA41
20141118A_1C03_S65	SC_UCSD_2524	20141118A	In7	In7BA41	Smart+Poly	Small	Frozen DMSO	1568-BA41/BA42-sec17	SRR5899698	In	BA41
20141118A_1C79_S69	SC_UCSD_2735	20141118A	In7	In7BA41	Smart+Poly	Small	Frozen DMSO	1568-BA41/BA42-sec17	SRR5899909	In	BA41
20141118A_1C82_S19	SC_UCSD_3661	20141118A	In7	In7BA41	Smart+Poly	Small	Frozen DMSO	1568-BA41/BA42-sec17	SRR5900835	In	BA41
20141118A_1C85_S81	SC_UCSD_3654	20141118A	In7	In7BA41	Smart+Poly	Small	Frozen DMSO	1568-BA41/BA42-sec17	SRR5900828	In	BA41
20141118B_1C25_S60	SC_UCSD_3073	20141118B	In7	In7BA41	Smart+Poly	Small	Frozen DMSO	1568-BA41/BA42-sec17	SRR5900247	In	BA41
20141118B_1C44_S45	SC_UCSD_2673	20141118B	In7	In7BA41	Smart+Poly	Small	Frozen DMSO	1568-BA41/BA42-sec17	SRR5899847	In	BA41
20141202A_1C29_S53	SC_UCSD_3671	20141202A	In7	In7BA41	Smart+Poly	Small	Frozen DMSO	1568-BA41/BA42-sec17	SRR5900845	In	BA41
20141203B_1C56_S33	SC_UCSD_3817	20141203B	In7	In7BA41	Smart+Poly	Small	Frozen DMSO	1568-BA41/BA42-sec17	SRR5900991	In	BA41
20141203B_1C69_S22	SC_UCSD_3662	20141203B	In7	In7BA41	Smart+Poly	Small	Frozen DMSO	1568-BA41/BA42-sec17	SRR5900836	In	BA41
20141203B_1C92_S81	SC_UCSD_3219	20141203B	In7	In7BA41	Smart+Poly	Small	Frozen DMSO	1568-BA41/BA42-sec17	SRR5900393	In	BA41
20141204A_1C30_S8	SC_UCSD_2104	20141204A	In7	In7BA41	Smart+Poly	Small	Frozen DMSO	1568-BA41/BA42-sec17	SRR5899278	In	BA41
20141204A_1C74_S29	SC_UCSD_3435	20141204A	In7	In7BA41	Smart+Poly	Small	Frozen DMSO	1568-BA41/BA42-sec17	SRR5900609	In	BA41
20141204A_1C90_S56	SC_UCSD_3010	20141204A	In7	In7BA41	Smart+Poly	Small	Frozen DMSO	1568-BA41/BA42-sec17	SRR5900184	In	BA41
20141204B_1C06_S58	SC_UCSD_1932	20141204B	In7	In7BA41	Smart+Poly	Small	Frozen DMSO	1568-BA41/BA42-sec17	SRR5899106	In	BA41
20141208A_1C16_S66	SC_UCSD_1872	20141208A	In7	In7BA41	Smart+Poly	Small	Frozen DMSO	1568-BA41/BA42-sec17	SRR5899046	In	BA41
20141208A_1C55_S3	SC_UCSD_2190	20141208A	In7	In7BA41	Smart+Poly	Small	Frozen DMSO	1568-BA41/BA42-sec17	SRR5899364	In	BA41
20141208A_1C92_S28	SC_UCSD_3908	20141208A	In7	In7BA41	Smart+Poly	Small	Frozen DMSO	1568-BA41/BA42-sec17	SRR5901082	In	BA41
20141210B_1C63_S17	SC_UCSD_2336	20141210B	In7	In7BA10	Smart+Poly	Small	Frozen DMSO	1568-BA10-sec1	SRR5899510	In	BA10
20141211B_1C18_S43	SC_UCSD_2934	20141211B	In7	In7BA10	Smart+Poly	Small	Frozen DMSO	1568-BA10-sec1	SRR5900108	In	BA10
20141211B_1C69_S20	SC_UCSD_2804	20141211B	In7	In7BA10	Smart+Poly	Small	Frozen DMSO	1568-BA10-sec1	SRR5899978	In	BA10
20150112A_1C60_S75	SC_UCSD_3843	20150112A	In7	In7BA17	Smart+Poly	Small	Frozen DMSO	1568-BA17-sec29	SRR5901017	In	BA17
20131219_1C91	SC_UCSD_16	20131219	In8	In8BA8	Smart	Medium	None	1568-BA8-sec7	SRR1763922	In	BA8
20140123_1C58_S118	SC_UCSD_227	20140123	In8	In8BA8	Smart+	Medium	None	1568-BA8-sec7	SRR1764120	In	BA8
20140212_1C30_S57	SC_UCSD_373	20140212	In8	In8BA8	Smart+	Medium	None	1568-BA8-sec9	SRR1764254	In	BA8
20140212_1C68_S41	SC_UCSD_414	20140212	In8	In8BA8	Smart+	Medium	None	1568-BA8-sec9	SRR1764291	In	BA8
20140212_1C70_S46	SC_UCSD_3929	20140212	In8	In8BA8	Smart+	Medium	None	1568-BA8-sec9	SRR5897250	In	BA8
20140212_1C86_S77	SC_UCSD_40	20140212	In8	In8BA8	Smart+	Medium	None	1568-BA8-sec9	SRR1763945	In	BA8
20140213_1C53_S11	SC_UCSD_241	20140213	In8	In8BA8	Smart+	Medium	None	1568-BA8-sec7	SRR1764134	In	BA8
20140213_1C59_S23	SC_UCSD_316	20140213	In8	In8BA8	Smart+	Medium	None	1568-BA8-sec7	SRR1764203	In	BA8
20140213_1C77_S59	SC_UCSD_269	20140213	In8	In8BA8	Smart+	Medium	None	1568-BA8-sec7	SRR1764160	In	BA8
20140213_1C84_S70	SC_UCSD_512	20140213	In8	In8BA8	Smart+	Medium	None	1568-BA8-sec7	SRR1764378	In	BA8
20140227_1C42_S81	SC_UCSD_299	20140227	In8	In8BA8	Smart+	Medium	None	1568-BA8-sec9	SRR1764189	In	BA8
20140304_1C58_S11	SC_UCSD_747	20140304	In8	In8BA8	Smart+	Small	None	1568-BA8-sec9	SRR2137261	In	BA8
20140304_1C95_S36	SC_UCSD_1070	20140304	In8	In8BA8	Smart+	Small	None	1568-BA8-sec9	SRR2137584	In	BA8
20140311_1C01_S3	SC_UCSD_853	20140311	In8	In8BA8	Smart+	Medium	None	1568-BA8-sec9	SRR2137367	In	BA8
20140311_1C57_S18	SC_UCSD_979	20140311	In8	In8BA8	Smart+	Medium	None	1568-BA8-sec9	SRR2137493	In	BA8
20140311_1C66_S36	SC_UCSD_652	20140311	In8	In8BA8	Smart+	Medium	None	1568-BA8-sec9	SRR2137166	In	BA8
20140320_1C84_S70	SC_UCSD_730	20140320	In8	In8BA8	Smart+	Medium	None	1568-BA8-sec9	SRR2137244	In	BA8
20140326_1C72_S59	SC_UCSD_829	20140326	In8	In8BA8	Smart+	Medium	Frozen DMSO	1568-BA8-sec9	SRR2137343	In	BA8
20140331_1C54_S24	SC_UCSD_1003	20140331	In8	In8BA8	Smart+	Small	Frozen DMSO	1568-BA8-sec9	SRR2137517	In	BA8
20140331_1C78_S15	SC_UCSD_775	20140331	In8	In8BA8	Smart+	Small	Frozen DMSO	1568-BA8-sec9	SRR2137289	In	BA8
20140415_1C49_S123	SC_UCSD_1180	20140415	In8	In8BA21	Smart+	Small	None	1568-BA21-sec15	SRR3230219	In	BA21
20140415_1C82_S157	SC_UCSD_1181	20140415	In8	In8BA21	Smart+	Small	None	1568-BA21-sec15	SRR3230220	In	BA21
20140605_1C52_S83	SC_UCSD_3927	20140605	In8	In8BA22	Smart+	Small	Frozen DMSO	1568-BA22-sec15	SRR5897248	In	BA22
20140702_1C19_S17	SC_UCSD_935	20140702	In8	In8BA8	Smart+	Small	Frozen DMSO	1568-BA8-sec9	SRR2137449	In	BA8
20140715_1C32_S43	SC_UCSD_1274	20140715	In8	In8BA21	Smart+	Small	Frozen DMSO	1568-BA21-sec15	SRR3230313	In	BA21
20140716_1C02_S96	SC_UCSD_1347	20140716	In8	In8BA21	Smart+	Small	Frozen DMSO	1568-BA21-sec15	SRR3230386	In	BA21
20140716_1C30_S47	SC_UCSD_1319	20140716	In8	In8BA21	Smart+	Small	Frozen DMSO	1568-BA21-sec15	SRR3230358	In	BA21
20140716_1C36_S48	SC_UCSD_3930	20140716	In8	In8BA21	Smart+	Small	Frozen DMSO	1568-BA21-sec15	SRR5897251	In	BA21
20140724_1C41_S49	SC_UCSD_1446	20140724	In8	In8BA21	Smart+	Small	Frozen DMSO	1568-BA21-sec15	SRR3230485	In	BA21
20140815A_1C24_S78	SC_UCSD_1602	20140815A	In8	In8BA21	Smart+	Small	Frozen DMSO	1568-BA21-sec15	SRR3230641	In	BA21
20140815A_1C93_S53	SC_UCSD_1593	20140815A	In8	In8BA21	Smart+	Small	Frozen DMSO	1568-BA21-sec15	SRR3230632	In	BA21
20140819_1C96_S57	SC_UCSD_1494	20140819	In8	In8BA41	Smart+	Small	Frozen DMSO	1568-BA41/BA42-sec17	SRR3230533	In	BA41
20140827A_1C07_S9	SC_UCSD_1710	20140827A	In8	In8BA10	Smart+	Small	None	1568-BA10-sec1	SRR3230749	In	BA10
20140930B_1C74_S88	SC_UCSD_1829	20140930B	In8	In8BA10	Smart+Poly	Small	Frozen DMSO	1568-BA10-sec1	SRR3230867	In	BA10
20141008B_1C69_S15	SC_UCSD_2877	20141008B	In8	In8BA17	Smart+Poly	Small	Frozen DMSO	1568-BA17-sec29	SRR5900051	In	BA17
20141014A_1C20_S19	SC_UCSD_2686	20141014A	In8	In8BA22	Smart+Poly	Small	Frozen DMSO	1568-BA22-sec15	SRR5899860	In	BA22
20141014A_1C46_S93	SC_UCSD_2421	20141014A	In8	In8BA22	Smart+Poly	Small	Frozen DMSO	1568-BA22-sec15	SRR5899595	In	BA22
20141014B_1C36_S88	SC_UCSD_3232	20141014B	In8	In8BA22	Smart+Poly	Small	Frozen DMSO	1568-BA22-sec15	SRR5900406	In	BA22
20141015A_1C01_S38	SC_UCSD_2593	20141015A	In8	In8BA10	Smart+Poly	Small	None	1568-BA10-sec1	SRR5899767	In	BA10
20141015A_1C36_S66	SC_UCSD_3609	20141015A	In8	In8BA10	Smart+Poly	Small	None	1568-BA10-sec1	SRR5900783	In	BA10
20141015A_1C88_S9	SC_UCSD_2562	20141015A	In8	In8BA10	Smart+Poly	Small	None	1568-BA10-sec1	SRR5899736	In	BA10
20141015B_1C03_S21	SC_UCSD_2480	20141015B	In8	In8BA10	Smart+Poly	Small	None (0.1% Paraformaldehyde treated)	1568-BA10-sec1	SRR5899654	In	BA10
20141015B_1C14_S22	SC_UCSD_3766	20141015B	In8	In8BA10	Smart+Poly	Small	None (0.1% Paraformaldehyde treated)	1568-BA10-sec1	SRR5900940	In	BA10
20141015B_1C21_S57	SC_UCSD_2718	20141015B	In8	In8BA10	Smart+Poly	Small	None (0.1% Paraformaldehyde treated)	1568-BA10-sec1	SRR5899892	In	BA10
20141015B_1C27_S11	SC_UCSD_2959	20141015B	In8	In8BA10	Smart+Poly	Small	None (0.1% Paraformaldehyde treated)	1568-BA10-sec1	SRR5900133	In	BA10
20141015B_1C42_S49	SC_UCSD_2234	20141015B	In8	In8BA10	Smart+Poly	Small	None (0.1% Paraformaldehyde treated)	1568-BA10-sec1	SRR5899408	In	BA10
20141016A_1C27_S67	SC_UCSD_3699	20141016A	In8	In8BA22	Smart+Poly	Small	Frozen DMSO	1568-BA22-sec15	SRR5900873	In	BA22
20141016A_1C34_S10	SC_UCSD_2845	20141016A	In8	In8BA22	Smart+Poly	Small	Frozen DMSO	1568-BA22-sec15	SRR5900019	In	BA22
20141016A_1C54_S48	SC_UCSD_3029	20141016A	In8	In8BA22	Smart+Poly	Small	Frozen DMSO	1568-BA22-sec15	SRR5900203	In	BA22
20141016B_1C53_S65	SC_UCSD_2240	20141016B	In8	In8BA22	Smart+Poly	Small	Frozen DMSO	1568-BA22-sec15	SRR5899414	In	BA22
20141016B_1C87_S50	SC_UCSD_2989	20141016B	In8	In8BA22	Smart+Poly	Small	Frozen DMSO	1568-BA22-sec15	SRR5900163	In	BA22
20141021A_1C13_S8	SC_UCSD_2144	20141021A	In8	In8BA22	Smart+Poly	Small	Frozen DMSO	1568-BA22-sec15	SRR5899318	In	BA22
20141021B_1C34_S19	SC_UCSD_3164	20141021B	In8	In8BA22	Smart+Poly	Small	Frozen DMSO	1568-BA22-sec15	SRR5900338	In	BA22
20141021B_1C86_S4	SC_UCSD_3666	20141021B	In8	In8BA22	Smart+Poly	Small	Frozen DMSO	1568-BA22-sec15	SRR5900840	In	BA22
20141022A_1C07_S64	SC_UCSD_2713	20141022A	In8	In8BA41	Smart+Poly	Small	Frozen DMSO	1568-BA41/BA42-sec17	SRR5899887	In	BA41
20141022B_1C12_S3	SC_UCSD_3320	20141022B	In8	In8BA10	Smart+Poly	Small	Frozen DMSO	1568-BA10-sec1	SRR5900494	In	BA10
20141022B_1C27_S1	SC_UCSD_2035	20141022B	In8	In8BA10	Smart+Poly	Small	Frozen DMSO	1568-BA10-sec1	SRR5899209	In	BA10
20141022B_1C28_S15	SC_UCSD_2729	20141022B	In8	In8BA10	Smart+Poly	Small	Frozen DMSO	1568-BA10-sec1	SRR5899903	In	BA10
20141022B_1C79_S62	SC_UCSD_2805	20141022B	In8	In8BA10	Smart+Poly	Small	Frozen DMSO	1568-BA10-sec1	SRR5899979	In	BA10
20141022B_1C85_S74	SC_UCSD_1891	20141022B	In8	In8BA10	Smart+Poly	Small	Frozen DMSO	1568-BA10-sec1	SRR5899065	In	BA10
20141027A_1C05_S41	SC_UCSD_2217	20141027A	In8	In8BA21	Smart+Poly	Small	Frozen DMSO	1568-BA21-sec15	SRR5899391	In	BA21
20141027A_1C35_S6	SC_UCSD_3067	20141027A	In8	In8BA21	Smart+Poly	Small	Frozen DMSO	1568-BA21-sec15	SRR5900241	In	BA21
20141027A_1C38_S2	SC_UCSD_2819	20141027A	In8	In8BA21	Smart+Poly	Small	Frozen DMSO	1568-BA21-sec15	SRR5899993	In	BA21
20141027A_1C82_S67	SC_UCSD_2739	20141027A	In8	In8BA21	Smart+Poly	Small	Frozen DMSO	1568-BA21-sec15	SRR5899913	In	BA21
20141027B_1C02_S44	SC_UCSD_2661	20141027B	In8	In8BA21	Smart+Poly	Small	Frozen DMSO	1568-BA21-sec15	SRR5899835	In	BA21
20141027B_1C12_S35	SC_UCSD_2379	20141027B	In8	In8BA21	Smart+Poly	Small	Frozen DMSO	1568-BA21-sec15	SRR5899553	In	BA21
20141027B_1C33_S33	SC_UCSD_3255	20141027B	In8	In8BA21	Smart+Poly	Small	Frozen DMSO	1568-BA21-sec15	SRR5900429	In	BA21
20141027B_1C61_S69	SC_UCSD_3450	20141027B	In8	In8BA21	Smart+Poly	Small	Frozen DMSO	1568-BA21-sec15	SRR5900624	In	BA21
20141027B_1C66_S39	SC_UCSD_2183	20141027B	In8	In8BA21	Smart+Poly	Small	Frozen DMSO	1568-BA21-sec15	SRR5899357	In	BA21
20141028A_1C39_S5	SC_UCSD_3317	20141028A	In8	In8BA21	Smart+Poly	Small	Frozen DMSO	1568-BA21-sec15	SRR5900491	In	BA21
20141028A_1C55_S17	SC_UCSD_1880	20141028A	In8	In8BA21	Smart+Poly	Small	Frozen DMSO	1568-BA21-sec15	SRR5899054	In	BA21
20141028B_1C32_S31	SC_UCSD_3104	20141028B	In8	In8BA17	Smart+Poly	Small	Frozen DMSO	1568-BA17-sec29	SRR5900278	In	BA17
20141028B_1C46_S82	SC_UCSD_1912	20141028B	In8	In8BA17	Smart+Poly	Small	Frozen DMSO	1568-BA17-sec29	SRR5899086	In	BA17
20141028B_1C53_S84	SC_UCSD_2025	20141028B	In8	In8BA17	Smart+Poly	Small	Frozen DMSO	1568-BA17-sec29	SRR5899199	In	BA17
20141028B_1C60_S61	SC_UCSD_1923	20141028B	In8	In8BA17	Smart+Poly	Small	Frozen DMSO	1568-BA17-sec29	SRR5899097	In	BA17
20141028B_1C73_S81	SC_UCSD_3491	20141028B	In8	In8BA17	Smart+Poly	Small	Frozen DMSO	1568-BA17-sec29	SRR5900665	In	BA17
20141028B_1C79_S93	SC_UCSD_2001	20141028B	In8	In8BA17	Smart+Poly	Small	Frozen DMSO	1568-BA17-sec29	SRR5899175	In	BA17
20141029B_1C53_S84	SC_UCSD_2761	20141029B	In8	In8BA41	Smart+Poly	Small	Frozen DMSO	1568-BA41/BA42-sec17	SRR5899935	In	BA41
20141112B_1C55_S8	SC_UCSD_2863	20141112B	In8	In8BA10	Smart+Poly	Small	Frozen DMSO	1568-BA10-sec1	SRR5900037	In	BA10
20141112B_1C73_S9	SC_UCSD_2096	20141112B	In8	In8BA10	Smart+Poly	Small	Frozen DMSO	1568-BA10-sec1	SRR5899270	In	BA10
20141112B_1C77_S82	SC_UCSD_2568	20141112B	In8	In8BA10	Smart+Poly	Small	Frozen DMSO	1568-BA10-sec1	SRR5899742	In	BA10
20141113A_1C96_S18	SC_UCSD_3396	20141113A	In8	In8BA41	Smart+Poly	Small	Frozen DMSO	1568-BA41/BA42-sec17	SRR5900570	In	BA41
20141113B_1C06_S23	SC_UCSD_2548	20141113B	In8	In8BA41	Smart+Poly	Small	Frozen DMSO	1568-BA41/BA42-sec17	SRR5899722	In	BA41
20141113B_1C34_S59	SC_UCSD_2406	20141113B	In8	In8BA41	Smart+Poly	Small	Frozen DMSO	1568-BA41/BA42-sec17	SRR5899580	In	BA41
20141113B_1C90_S49	SC_UCSD_2731	20141113B	In8	In8BA41	Smart+Poly	Small	Frozen DMSO	1568-BA41/BA42-sec17	SRR5899905	In	BA41
20141117A_1C10_S20	SC_UCSD_2128	20141117A	In8	In8BA41	Smart+Poly	Small	Frozen DMSO	1568-BA41/BA42-sec17	SRR5899302	In	BA41
20141117B_1C38_S35	SC_UCSD_3636	20141117B	In8	In8BA41	Smart+Poly	Small	Frozen DMSO	1568-BA41/BA42-sec17	SRR5900810	In	BA41
20141117B_1C42_S75	SC_UCSD_1950	20141117B	In8	In8BA41	Smart+Poly	Small	Frozen DMSO	1568-BA41/BA42-sec17	SRR5899124	In	BA41
20141118A_1C37_S18	SC_UCSD_3565	20141118A	In8	In8BA41	Smart+Poly	Small	Frozen DMSO	1568-BA41/BA42-sec17	SRR5900739	In	BA41
20141118A_1C64_S83	SC_UCSD_2726	20141118A	In8	In8BA41	Smart+Poly	Small	Frozen DMSO	1568-BA41/BA42-sec17	SRR5899900	In	BA41
20141118A_1C69_S45	SC_UCSD_3001	20141118A	In8	In8BA41	Smart+Poly	Small	Frozen DMSO	1568-BA41/BA42-sec17	SRR5900175	In	BA41
20141118A_1C70_S95	SC_UCSD_1934	20141118A	In8	In8BA41	Smart+Poly	Small	Frozen DMSO	1568-BA41/BA42-sec17	SRR5899108	In	BA41
20141118B_1C82_S27	SC_UCSD_2371	20141118B	In8	In8BA41	Smart+Poly	Small	Frozen DMSO	1568-BA41/BA42-sec17	SRR5899545	In	BA41
20141202A_1C14_S73	SC_UCSD_3758	20141202A	In8	In8BA41	Smart+Poly	Small	Frozen DMSO	1568-BA41/BA42-sec17	SRR5900932	In	BA41
20141202A_1C36_S42	SC_UCSD_2130	20141202A	In8	In8BA41	Smart+Poly	Small	Frozen DMSO	1568-BA41/BA42-sec17	SRR5899304	In	BA41
20141202A_1C62_S4	SC_UCSD_2052	20141202A	In8	In8BA41	Smart+Poly	Small	Frozen DMSO	1568-BA41/BA42-sec17	SRR5899226	In	BA41
20141202A_1C84_S19	SC_UCSD_1875	20141202A	In8	In8BA41	Smart+Poly	Small	Frozen DMSO	1568-BA41/BA42-sec17	SRR5899049	In	BA41
20141202B_1C16_S37	SC_UCSD_2789	20141202B	In8	In8BA41	Smart+Poly	Small	Frozen DMSO	1568-BA41/BA42-sec17	SRR5899963	In	BA41
20141202B_1C43_S21	SC_UCSD_3152	20141202B	In8	In8BA41	Smart+Poly	Small	Frozen DMSO	1568-BA41/BA42-sec17	SRR5900326	In	BA41
20141202B_1C56_S11	SC_UCSD_2268	20141202B	In8	In8BA41	Smart+Poly	Small	Frozen DMSO	1568-BA41/BA42-sec17	SRR5899442	In	BA41
20141203A_1C40_S89	SC_UCSD_3171	20141203A	In8	In8BA41	Smart+Poly	Small	Frozen DMSO	1568-BA41/BA42-sec17	SRR5900345	In	BA41
20141203B_1C80_S69	SC_UCSD_3488	20141203B	In8	In8BA41	Smart+Poly	Small	Frozen DMSO	1568-BA41/BA42-sec17	SRR5900662	In	BA41
20141204A_1C41_S31	SC_UCSD_2306	20141204A	In8	In8BA41	Smart+Poly	Small	Frozen DMSO	1568-BA41/BA42-sec17	SRR5899480	In	BA41
20141204A_1C77_S21	SC_UCSD_3203	20141204A	In8	In8BA41	Smart+Poly	Small	Frozen DMSO	1568-BA41/BA42-sec17	SRR5900377	In	BA41
20141204A_1C88_S10	SC_UCSD_2677	20141204A	In8	In8BA41	Smart+Poly	Small	Frozen DMSO	1568-BA41/BA42-sec17	SRR5899851	In	BA41
20141204B_1C71_S16	SC_UCSD_3619	20141204B	In8	In8BA41	Smart+Poly	Small	Frozen DMSO	1568-BA41/BA42-sec17	SRR5900793	In	BA41
20141208A_1C40_S41	SC_UCSD_3375	20141208A	In8	In8BA41	Smart+Poly	Small	Frozen DMSO	1568-BA41/BA42-sec17	SRR5900549	In	BA41
20141208A_1C58_S43	SC_UCSD_2174	20141208A	In8	In8BA41	Smart+Poly	Small	Frozen DMSO	1568-BA41/BA42-sec17	SRR5899348	In	BA41
20141208A_1C71_S44	SC_UCSD_2579	20141208A	In8	In8BA41	Smart+Poly	Small	Frozen DMSO	1568-BA41/BA42-sec17	SRR5899753	In	BA41
20141208A_1C77_S56	SC_UCSD_3352	20141208A	In8	In8BA41	Smart+Poly	Small	Frozen DMSO	1568-BA41/BA42-sec17	SRR5900526	In	BA41
20141208B_1C10_S77	SC_UCSD_3452	20141208B	In8	In8BA41	Smart+Poly	Small	Frozen DMSO	1568-BA41/BA42-sec17	SRR5900626	In	BA41
20141208B_1C19_S52	SC_UCSD_2267	20141208B	In8	In8BA41	Smart+Poly	Small	Frozen DMSO	1568-BA41/BA42-sec17	SRR5899441	In	BA41
20141208B_1C48_S34	SC_UCSD_3552	20141208B	In8	In8BA41	Smart+Poly	Small	Frozen DMSO	1568-BA41/BA42-sec17	SRR5900726	In	BA41
20141208B_1C70_S56	SC_UCSD_3146	20141208B	In8	In8BA41	Smart+Poly	Small	Frozen DMSO	1568-BA41/BA42-sec17	SRR5900320	In	BA41
20141208B_1C85_S54	SC_UCSD_3826	20141208B	In8	In8BA41	Smart+Poly	Small	Frozen DMSO	1568-BA41/BA42-sec17	SRR5901000	In	BA41
20141211A_1C08_S93	SC_UCSD_2821	20141211A	In8	In8BA10	Smart+Poly	Small	Frozen DMSO	1568-BA10-sec1	SRR5899995	In	BA10
20141211A_1C10_S26	SC_UCSD_3722	20141211A	In8	In8BA10	Smart+Poly	Small	Frozen DMSO	1568-BA10-sec1	SRR5900896	In	BA10
20141211A_1C17_S69	SC_UCSD_3889	20141211A	In8	In8BA10	Smart+Poly	Small	Frozen DMSO	1568-BA10-sec1	SRR5901063	In	BA10
20141211A_1C20_S10	SC_UCSD_3393	20141211A	In8	In8BA10	Smart+Poly	Small	Frozen DMSO	1568-BA10-sec1	SRR5900567	In	BA10
20141211A_1C29_S80	SC_UCSD_2566	20141211A	In8	In8BA10	Smart+Poly	Small	Frozen DMSO	1568-BA10-sec1	SRR5899740	In	BA10
20141211A_1C42_S59	SC_UCSD_2102	20141211A	In8	In8BA10	Smart+Poly	Small	Frozen DMSO	1568-BA10-sec1	SRR5899276	In	BA10
20141211A_1C71_S71	SC_UCSD_3258	20141211A	In8	In8BA10	Smart+Poly	Small	Frozen DMSO	1568-BA10-sec1	SRR5900432	In	BA10
20141211B_1C36_S10	SC_UCSD_1961	20141211B	In8	In8BA10	Smart+Poly	Small	Frozen DMSO	1568-BA10-sec1	SRR5899135	In	BA10
20141211B_1C79_S32	SC_UCSD_2705	20141211B	In8	In8BA10	Smart+Poly	Small	Frozen DMSO	1568-BA10-sec1	SRR5899879	In	BA10
20150112A_1C01_S80	SC_UCSD_2987	20150112A	In8	In8BA17	Smart+Poly	Small	Frozen DMSO	1568-BA17-sec29	SRR5900161	In	BA17
20150112A_1C16_S61	SC_UCSD_3147	20150112A	In8	In8BA17	Smart+Poly	Small	Frozen DMSO	1568-BA17-sec29	SRR5900321	In	BA17
20150112A_1C49_S81	SC_UCSD_3910	20150112A	In8	In8BA17	Smart+Poly	Small	Frozen DMSO	1568-BA17-sec29	SRR5901084	In	BA17
20150112A_1C69_S47	SC_UCSD_3508	20150112A	In8	In8BA17	Smart+Poly	Small	Frozen DMSO	1568-BA17-sec29	SRR5900682	In	BA17
20150112B_1C16_S34	SC_UCSD_3136	20150112B	In8	In8BA17	Smart+Poly	Small	Frozen DMSO	1568-BA17-sec29	SRR5900310	In	BA17
20150112B_1C19_S18	SC_UCSD_3018	20150112B	In8	In8BA17	Smart+Poly	Small	Frozen DMSO	1568-BA17-sec29	SRR5900192	In	BA17
20150112B_1C83_S83	SC_UCSD_3002	20150112B	In8	In8BA17	Smart+Poly	Small	Frozen DMSO	1568-BA17-sec29	SRR5900176	In	BA17
20150122B_1C06_S45	SC_UCSD_2975	20150122B	NoN	NoNBA17	Smart+Poly	Small	Frozen DMSO	1568-BA17-sec29	SRR5900149	NoN	BA17
20150122B_1C11_S26	SC_UCSD_3069	20150122B	NoN	NoNBA17	Smart+Poly	Small	Frozen DMSO	1568-BA17-sec29	SRR5900243	NoN	BA17
20150122B_1C27_S52	SC_UCSD_3130	20150122B	NoN	NoNBA17	Smart+Poly	Small	Frozen DMSO	1568-BA17-sec29	SRR5900304	NoN	BA17
20150122B_1C32_S69	SC_UCSD_3037	20150122B	NoN	NoNBA17	Smart+Poly	Small	Frozen DMSO	1568-BA17-sec29	SRR5900211	NoN	BA17
20150122B_1C41_S55	SC_UCSD_3178	20150122B	NoN	NoNBA17	Smart+Poly	Small	Frozen DMSO	1568-BA17-sec29	SRR5900352	NoN	BA17
20150122B_1C48_S17	SC_UCSD_2192	20150122B	NoN	NoNBA17	Smart+Poly	Small	Frozen DMSO	1568-BA17-sec29	SRR5899366	NoN	BA17
20150122B_1C50_S53	SC_UCSD_2437	20150122B	NoN	NoNBA17	Smart+Poly	Small	Frozen DMSO	1568-BA17-sec29	SRR5899611	NoN	BA17
20150122B_1C57_S15	SC_UCSD_2344	20150122B	NoN	NoNBA17	Smart+Poly	Small	Frozen DMSO	1568-BA17-sec29	SRR5899518	NoN	BA17
20150122B_1C88_S75	SC_UCSD_3187	20150122B	NoN	NoNBA17	Smart+Poly	Small	Frozen DMSO	1568-BA17-sec29	SRR5900361	NoN	BA17
20131219_1C01	SC_UCSD_443	20131219	Ex1	Ex1BA8	Smart	Medium	None	1568-BA8-sec7	SRR1764318	Ex	BA8
20131219_1C13	SC_UCSD_232	20131219	Ex1	Ex1BA8	Smart	Medium	None	1568-BA8-sec7	SRR1764125	Ex	BA8
20131219_1C68	SC_UCSD_283	20131219	Ex1	Ex1BA8	Smart	Medium	None	1568-BA8-sec7	SRR1764174	Ex	BA8
20140123_1C09_S109	SC_UCSD_492	20140123	Ex1	Ex1BA8	Smart+	Medium	None	1568-BA8-sec7	SRR1764362	Ex	BA8
20140123_1C51_S102	SC_UCSD_28	20140123	Ex1	Ex1BA8	Smart+	Medium	None	1568-BA8-sec7	SRR1763934	Ex	BA8
20140123_1C76_S156	SC_UCSD_163	20140123	Ex1	Ex1BA8	Smart+	Medium	None	1568-BA8-sec7	SRR1764060	Ex	BA8
20140205_1C02_S2	SC_UCSD_501	20140205	Ex1	Ex1BA8	Smart	Medium	None	1568-BA8-sec9	SRR1764369	Ex	BA8
20140205_1C25_S49	SC_UCSD_290	20140205	Ex1	Ex1BA8	Smart	Medium	None	1568-BA8-sec9	SRR1764180	Ex	BA8
20140205_1C66_S36	SC_UCSD_32	20140205	Ex1	Ex1BA8	Smart	Medium	None	1568-BA8-sec9	SRR1763937	Ex	BA8
20140212_1C03_S1	SC_UCSD_92	20140212	Ex1	Ex1BA8	Smart+	Medium	None	1568-BA8-sec9	SRR1763992	Ex	BA8
20140212_1C11_S20	SC_UCSD_298	20140212	Ex1	Ex1BA8	Smart+	Medium	None	1568-BA8-sec9	SRR1764188	Ex	BA8
20140212_1C53_S11	SC_UCSD_219	20140212	Ex1	Ex1BA8	Smart+	Medium	None	1568-BA8-sec9	SRR1764112	Ex	BA8
20140212_1C56_S17	SC_UCSD_180	20140212	Ex1	Ex1BA8	Smart+	Medium	None	1568-BA8-sec9	SRR1764076	Ex	BA8
20140212_1C83_S71	SC_UCSD_216	20140212	Ex1	Ex1BA8	Smart+	Medium	None	1568-BA8-sec9	SRR1764110	Ex	BA8
20140212_1C88_S84	SC_UCSD_201	20140212	Ex1	Ex1BA8	Smart+	Medium	None	1568-BA8-sec9	SRR1764095	Ex	BA8
20140212_1C93_S88	SC_UCSD_53	20140212	Ex1	Ex1BA8	Smart+	Medium	None	1568-BA8-sec9	SRR1763955	Ex	BA8
20140225_1C55	SC_UCSD_372	20140225	Ex1	Ex1BA8	Smart+	Medium	None	1568-BA8-sec9	SRR1764253	Ex	BA8
20140226_1C72	SC_UCSD_135	20140226	Ex1	Ex1BA8	Smart+	Medium	Frozen DMSO	1568-BA8-sec9	SRR1764033	Ex	BA8
20140226_1C79	SC_UCSD_292	20140226	Ex1	Ex1BA8	Smart+	Medium	Frozen DMSO	1568-BA8-sec9	SRR1764182	Ex	BA8
20140227_1C89_S83	SC_UCSD_438	20140227	Ex1	Ex1BA8	Smart+	Medium	None	1568-BA8-sec9	SRR1764313	Ex	BA8
20140227_1C95_S95	SC_UCSD_486	20140227	Ex1	Ex1BA8	Smart+	Medium	None	1568-BA8-sec9	SRR1764357	Ex	BA8
20140304_1C08_S8	SC_UCSD_971	20140304	Ex1	Ex1BA8	Smart+	Small	None	1568-BA8-sec9	SRR2137485	Ex	BA8
20140304_1C36_S26	SC_UCSD_1030	20140304	Ex1	Ex1BA8	Smart+	Small	None	1568-BA8-sec9	SRR2137544	Ex	BA8
20140304_1C44_S31	SC_UCSD_940	20140304	Ex1	Ex1BA8	Smart+	Small	None	1568-BA8-sec9	SRR2137454	Ex	BA8
20140311_1C70_S46	SC_UCSD_787	20140311	Ex1	Ex1BA8	Smart+	Medium	None	1568-BA8-sec9	SRR2137301	Ex	BA8
20140313_1C02_S2	SC_UCSD_1066	20140313	Ex1	Ex1BA8	Smart+	Medium	None	1568-BA8-sec9	SRR2137580	Ex	BA8
20140313_1C79_S66	SC_UCSD_753	20140313	Ex1	Ex1BA8	Smart+	Medium	None	1568-BA8-sec9	SRR2137267	Ex	BA8
20140317_1C04_S9	SC_UCSD_925	20140317	Ex1	Ex1BA8	Smart+	Medium	Frozen DMSO	1568-BA8-sec9	SRR2137439	Ex	BA8
20140317_1C33_S63	SC_UCSD_1099	20140317	Ex1	Ex1BA8	Smart+	Medium	Frozen DMSO	1568-BA8-sec9	SRR2137613	Ex	BA8
20140317_1C65_S35	SC_UCSD_621	20140317	Ex1	Ex1BA8	Smart+	Medium	Frozen DMSO	1568-BA8-sec9	SRR2137135	Ex	BA8
20140317_1C79_S66	SC_UCSD_733	20140317	Ex1	Ex1BA8	Smart+	Medium	Frozen DMSO	1568-BA8-sec9	SRR2137247	Ex	BA8
20140317_1C92_S89	SC_UCSD_794	20140317	Ex1	Ex1BA8	Smart+	Medium	Frozen DMSO	1568-BA8-sec9	SRR2137308	Ex	BA8
20140320_1C96_S94	SC_UCSD_751	20140320	Ex1	Ex1BA8	Smart+	Medium	None	1568-BA8-sec9	SRR2137265	Ex	BA8
20140321_1C10_S21	SC_UCSD_967	20140321	Ex1	Ex1BA8	Smart+	Medium	Frozen Glycerol	1568-BA8-sec9	SRR2137481	Ex	BA8
20140321_1C11_S20	SC_UCSD_690	20140321	Ex1	Ex1BA8	Smart+	Medium	Frozen Glycerol	1568-BA8-sec9	SRR2137204	Ex	BA8
20140321_1C57_S18	SC_UCSD_649	20140321	Ex1	Ex1BA8	Smart+	Medium	Frozen Glycerol	1568-BA8-sec9	SRR2137163	Ex	BA8
20140321_1C66_S36	SC_UCSD_941	20140321	Ex1	Ex1BA8	Smart+	Medium	Frozen Glycerol	1568-BA8-sec9	SRR2137455	Ex	BA8
20140321_1C85_S78	SC_UCSD_742	20140321	Ex1	Ex1BA8	Smart+	Medium	Frozen Glycerol	1568-BA8-sec9	SRR2137256	Ex	BA8
20140326_1C36_S47	SC_UCSD_1098	20140326	Ex1	Ex1BA8	Smart+	Medium	Frozen DMSO	1568-BA8-sec9	SRR2137612	Ex	BA8
20140326_1C73_S31	SC_UCSD_964	20140326	Ex1	Ex1BA8	Smart+	Medium	Frozen DMSO	1568-BA8-sec9	SRR2137478	Ex	BA8
20140331_1C16_S5	SC_UCSD_1027	20140331	Ex1	Ex1BA8	Smart+	Small	Frozen DMSO	1568-BA8-sec9	SRR2137541	Ex	BA8
20140331_1C17_S55	SC_UCSD_616	20140331	Ex1	Ex1BA8	Smart+	Small	Frozen DMSO	1568-BA8-sec9	SRR2137130	Ex	BA8
20140331_1C20_S44	SC_UCSD_1088	20140331	Ex1	Ex1BA8	Smart+	Small	Frozen DMSO	1568-BA8-sec9	SRR2137602	Ex	BA8
20140331_1C56_S3	SC_UCSD_642	20140331	Ex1	Ex1BA8	Smart+	Small	Frozen DMSO	1568-BA8-sec9	SRR2137156	Ex	BA8
20140331_1C59_S49	SC_UCSD_1028	20140331	Ex1	Ex1BA8	Smart+	Small	Frozen DMSO	1568-BA8-sec9	SRR2137542	Ex	BA8
20140331_1C73_S46	SC_UCSD_768	20140331	Ex1	Ex1BA8	Smart+	Small	Frozen DMSO	1568-BA8-sec9	SRR2137282	Ex	BA8
20140331_1C76_S28	SC_UCSD_666	20140331	Ex1	Ex1BA8	Smart+	Small	Frozen DMSO	1568-BA8-sec9	SRR2137180	Ex	BA8
20140331_1C92_S9	SC_UCSD_620	20140331	Ex1	Ex1BA8	Smart+	Small	Frozen DMSO	1568-BA8-sec9	SRR2137134	Ex	BA8
20140331_1C93_S59	SC_UCSD_845	20140331	Ex1	Ex1BA8	Smart+	Small	Frozen DMSO	1568-BA8-sec9	SRR2137359	Ex	BA8
20140331_1C95_S52	SC_UCSD_657	20140331	Ex1	Ex1BA8	Smart+	Small	Frozen DMSO	1568-BA8-sec9	SRR2137171	Ex	BA8
20140402_1C09_S84	SC_UCSD_584	20140402	Ex1	Ex1BA8	Smart+Poly	Small	Frozen DMSO	1568-BA8-sec9	SRR2137098	Ex	BA8
20140402_1C27_S77	SC_UCSD_930	20140402	Ex1	Ex1BA8	Smart+Poly	Small	Frozen DMSO	1568-BA8-sec9	SRR2137444	Ex	BA8
20140402_1C42_S68	SC_UCSD_836	20140402	Ex1	Ex1BA8	Smart+Poly	Small	Frozen DMSO	1568-BA8-sec9	SRR2137350	Ex	BA8
20140402_1C43_S86	SC_UCSD_731	20140402	Ex1	Ex1BA8	Smart+Poly	Small	Frozen DMSO	1568-BA8-sec9	SRR2137245	Ex	BA8
20140410_1C22_S95	SC_UCSD_1106	20140410	Ex1	Ex1BA17	Smart+	Small	None	1568-BA17-sec29	SRR3230145	Ex	BA17
20140410_1C40_S85	SC_UCSD_1136	20140410	Ex1	Ex1BA17	Smart+	Small	None	1568-BA17-sec29	SRR3230175	Ex	BA17
20140410_1C75_S64	SC_UCSD_1108	20140410	Ex1	Ex1BA17	Smart+	Small	None	1568-BA17-sec29	SRR3230147	Ex	BA17
20140410_1C80_S70	SC_UCSD_1125	20140410	Ex1	Ex1BA17	Smart+	Small	None	1568-BA17-sec29	SRR3230164	Ex	BA17
20140410_1C87_S66	SC_UCSD_3952	20140410	Ex1	Ex1BA17	Smart+	Small	None	1568-BA17-sec29	SRR5897273	Ex	BA17
20140415_1C02_S116	SC_UCSD_1169	20140415	Ex1	Ex1BA21	Smart+	Small	None	1568-BA21-sec15	SRR3230208	Ex	BA21
20140415_1C04_S140	SC_UCSD_1178	20140415	Ex1	Ex1BA21	Smart+	Small	None	1568-BA21-sec15	SRR3230217	Ex	BA21
20140415_1C08_S117	SC_UCSD_1153	20140415	Ex1	Ex1BA21	Smart+	Small	None	1568-BA21-sec15	SRR3230192	Ex	BA21
20140415_1C16_S141	SC_UCSD_1174	20140415	Ex1	Ex1BA21	Smart+	Small	None	1568-BA21-sec15	SRR3230213	Ex	BA21
20140415_1C17_S137	SC_UCSD_1162	20140415	Ex1	Ex1BA21	Smart+	Small	None	1568-BA21-sec15	SRR3230201	Ex	BA21
20140415_1C18_S132	SC_UCSD_1183	20140415	Ex1	Ex1BA21	Smart+	Small	None	1568-BA21-sec15	SRR3230222	Ex	BA21
20140415_1C28_S134	SC_UCSD_1164	20140415	Ex1	Ex1BA21	Smart+	Small	None	1568-BA21-sec15	SRR3230203	Ex	BA21
20140415_1C29_S138	SC_UCSD_1184	20140415	Ex1	Ex1BA21	Smart+	Small	None	1568-BA21-sec15	SRR3230223	Ex	BA21
20140415_1C34_S135	SC_UCSD_1168	20140415	Ex1	Ex1BA21	Smart+	Small	None	1568-BA21-sec15	SRR3230207	Ex	BA21
20140415_1C35_S139	SC_UCSD_1158	20140415	Ex1	Ex1BA21	Smart+	Small	None	1568-BA21-sec15	SRR3230197	Ex	BA21
20140415_1C43_S115	SC_UCSD_1159	20140415	Ex1	Ex1BA21	Smart+	Small	None	1568-BA21-sec15	SRR3230198	Ex	BA21
20140415_1C44_S119	SC_UCSD_1172	20140415	Ex1	Ex1BA21	Smart+	Small	None	1568-BA21-sec15	SRR3230211	Ex	BA21
20140415_1C59_S149	SC_UCSD_1179	20140415	Ex1	Ex1BA21	Smart+	Small	None	1568-BA21-sec15	SRR3230218	Ex	BA21
20140415_1C71_S151	SC_UCSD_1165	20140415	Ex1	Ex1BA21	Smart+	Small	None	1568-BA21-sec15	SRR3230204	Ex	BA21
20140415_1C72_S155	SC_UCSD_1148	20140415	Ex1	Ex1BA21	Smart+	Small	None	1568-BA21-sec15	SRR3230187	Ex	BA21
20140415_1C76_S156	SC_UCSD_1186	20140415	Ex1	Ex1BA21	Smart+	Small	None	1568-BA21-sec15	SRR3230225	Ex	BA21
20140415_1C84_S146	SC_UCSD_1177	20140415	Ex1	Ex1BA21	Smart+	Small	None	1568-BA21-sec15	SRR3230216	Ex	BA21
20140415_1C94_S158	SC_UCSD_1147	20140415	Ex1	Ex1BA21	Smart+	Small	None	1568-BA21-sec15	SRR3230186	Ex	BA21
20140422_1C08_S3	SC_UCSD_2378	20140422	Ex1	Ex1BA22	Smart+	Small	None	1568-BA22-sec15	SRR5899552	Ex	BA22
20140422_1C12_S27	SC_UCSD_2195	20140422	Ex1	Ex1BA22	Smart+	Small	None	1568-BA22-sec15	SRR5899369	Ex	BA22
20140422_1C22_S35	SC_UCSD_3304	20140422	Ex1	Ex1BA22	Smart+	Small	None	1568-BA22-sec15	SRR5900478	Ex	BA22
20140422_1C32_S6	SC_UCSD_2353	20140422	Ex1	Ex1BA22	Smart+	Small	None	1568-BA22-sec15	SRR5899527	Ex	BA22
20140422_1C69_S24	SC_UCSD_2920	20140422	Ex1	Ex1BA22	Smart+	Small	None	1568-BA22-sec15	SRR5900094	Ex	BA22
20140422_1C71_S43	SC_UCSD_2596	20140422	Ex1	Ex1BA22	Smart+	Small	None	1568-BA22-sec15	SRR5899770	Ex	BA22
20140422_1C81_S18	SC_UCSD_2478	20140422	Ex1	Ex1BA22	Smart+	Small	None	1568-BA22-sec15	SRR5899652	Ex	BA22
20140424_1C12_S77	SC_UCSD_3772	20140424	Ex1	Ex1BA41	Smart+	Small	None	1568-BA41/BA42-sec17	SRR5900946	Ex	BA41
20140424_1C19_S57	SC_UCSD_3074	20140424	Ex1	Ex1BA41	Smart+	Small	None	1568-BA41/BA42-sec17	SRR5900248	Ex	BA41
20140424_1C27_S58	SC_UCSD_2600	20140424	Ex1	Ex1BA41	Smart+	Small	None	1568-BA41/BA42-sec17	SRR5899774	Ex	BA41
20140424_1C39_S59	SC_UCSD_3369	20140424	Ex1	Ex1BA41	Smart+	Small	None	1568-BA41/BA42-sec17	SRR5900543	Ex	BA41
20140424_1C46_S78	SC_UCSD_2513	20140424	Ex1	Ex1BA41	Smart+	Small	None	1568-BA41/BA42-sec17	SRR5899687	Ex	BA41
20140424_1C47_S84	SC_UCSD_2504	20140424	Ex1	Ex1BA41	Smart+	Small	None	1568-BA41/BA42-sec17	SRR5899678	Ex	BA41
20140424_1C50_S65	SC_UCSD_3582	20140424	Ex1	Ex1BA41	Smart+	Small	None	1568-BA41/BA42-sec17	SRR5900756	Ex	BA41
20140424_1C58_S88	SC_UCSD_3292	20140424	Ex1	Ex1BA41	Smart+	Small	None	1568-BA41/BA42-sec17	SRR5900466	Ex	BA41
20140424_1C59_S92	SC_UCSD_1924	20140424	Ex1	Ex1BA41	Smart+	Small	None	1568-BA41/BA42-sec17	SRR5899098	Ex	BA41
20140424_1C62_S67	SC_UCSD_2324	20140424	Ex1	Ex1BA41	Smart+	Small	None	1568-BA41/BA42-sec17	SRR5899498	Ex	BA41
20140424_1C68_S68	SC_UCSD_3412	20140424	Ex1	Ex1BA41	Smart+	Small	None	1568-BA41/BA42-sec17	SRR5900586	Ex	BA41
20140424_1C72_S3	SC_UCSD_3778	20140424	Ex1	Ex1BA41	Smart+	Small	None	1568-BA41/BA42-sec17	SRR5900952	Ex	BA41
20140424_1C77_S95	SC_UCSD_3743	20140424	Ex1	Ex1BA41	Smart+	Small	None	1568-BA41/BA42-sec17	SRR5900917	Ex	BA41
20140424_1C80_S69	SC_UCSD_3669	20140424	Ex1	Ex1BA41	Smart+	Small	None	1568-BA41/BA42-sec17	SRR5900843	Ex	BA41
20140424_1C81_S63	SC_UCSD_2009	20140424	Ex1	Ex1BA41	Smart+	Small	None	1568-BA41/BA42-sec17	SRR5899183	Ex	BA41
20140424_1C86_S70	SC_UCSD_3846	20140424	Ex1	Ex1BA41	Smart+	Small	None	1568-BA41/BA42-sec17	SRR5901020	Ex	BA41
20140424_1C90_S91	SC_UCSD_3466	20140424	Ex1	Ex1BA41	Smart+	Small	None	1568-BA41/BA42-sec17	SRR5900640	Ex	BA41
20140424_1C91_S76	SC_UCSD_3616	20140424	Ex1	Ex1BA41	Smart+	Small	None	1568-BA41/BA42-sec17	SRR5900790	Ex	BA41
20140424_1C92_S71	SC_UCSD_3228	20140424	Ex1	Ex1BA41	Smart+	Small	None	1568-BA41/BA42-sec17	SRR5900402	Ex	BA41
20140501_1C08_S12	SC_UCSD_1200	20140501	Ex1	Ex1BA21	Smart+	Small	Frozen DMSO	1568-BA21-sec15	SRR3230239	Ex	BA21
20140501_1C09_S6	SC_UCSD_1220	20140501	Ex1	Ex1BA21	Smart+	Small	Frozen DMSO	1568-BA21-sec15	SRR3230259	Ex	BA21
20140501_1C10_S42	SC_UCSD_1212	20140501	Ex1	Ex1BA21	Smart+	Small	Frozen DMSO	1568-BA21-sec15	SRR3230251	Ex	BA21
20140501_1C11_S37	SC_UCSD_1213	20140501	Ex1	Ex1BA21	Smart+	Small	Frozen DMSO	1568-BA21-sec15	SRR3230252	Ex	BA21
20140501_1C15_S7	SC_UCSD_1227	20140501	Ex1	Ex1BA21	Smart+	Small	Frozen DMSO	1568-BA21-sec15	SRR3230266	Ex	BA21
20140501_1C16_S43	SC_UCSD_1187	20140501	Ex1	Ex1BA21	Smart+	Small	Frozen DMSO	1568-BA21-sec15	SRR3230226	Ex	BA21
20140501_1C17_S38	SC_UCSD_1232	20140501	Ex1	Ex1BA21	Smart+	Small	Frozen DMSO	1568-BA21-sec15	SRR3230271	Ex	BA21
20140501_1C18_S32	SC_UCSD_1216	20140501	Ex1	Ex1BA21	Smart+	Small	Frozen DMSO	1568-BA21-sec15	SRR3230255	Ex	BA21
20140501_1C19_S18	SC_UCSD_1219	20140501	Ex1	Ex1BA21	Smart+	Small	Frozen DMSO	1568-BA21-sec15	SRR3230258	Ex	BA21
20140501_1C20_S14	SC_UCSD_1221	20140501	Ex1	Ex1BA21	Smart+	Small	Frozen DMSO	1568-BA21-sec15	SRR3230260	Ex	BA21
20140501_1C23_S39	SC_UCSD_1228	20140501	Ex1	Ex1BA21	Smart+	Small	Frozen DMSO	1568-BA21-sec15	SRR3230267	Ex	BA21
20140501_1C52_S45	SC_UCSD_1204	20140501	Ex1	Ex1BA21	Smart+	Small	Frozen DMSO	1568-BA21-sec15	SRR3230243	Ex	BA21
20140501_1C68_S24	SC_UCSD_1208	20140501	Ex1	Ex1BA21	Smart+	Small	Frozen DMSO	1568-BA21-sec15	SRR3230247	Ex	BA21
20140501_1C69_S27	SC_UCSD_1209	20140501	Ex1	Ex1BA21	Smart+	Small	Frozen DMSO	1568-BA21-sec15	SRR3230248	Ex	BA21
20140501_1C71_S52	SC_UCSD_1205	20140501	Ex1	Ex1BA21	Smart+	Small	Frozen DMSO	1568-BA21-sec15	SRR3230244	Ex	BA21
20140501_1C73_S28	SC_UCSD_1201	20140501	Ex1	Ex1BA21	Smart+	Small	Frozen DMSO	1568-BA21-sec15	SRR3230240	Ex	BA21
20140501_1C76_S59	SC_UCSD_1211	20140501	Ex1	Ex1BA21	Smart+	Small	Frozen DMSO	1568-BA21-sec15	SRR3230250	Ex	BA21
20140501_1C77_S53	SC_UCSD_1188	20140501	Ex1	Ex1BA21	Smart+	Small	Frozen DMSO	1568-BA21-sec15	SRR3230227	Ex	BA21
20140501_1C82_S60	SC_UCSD_1190	20140501	Ex1	Ex1BA21	Smart+	Small	Frozen DMSO	1568-BA21-sec15	SRR3230229	Ex	BA21
20140501_1C85_S29	SC_UCSD_1225	20140501	Ex1	Ex1BA21	Smart+	Small	Frozen DMSO	1568-BA21-sec15	SRR3230264	Ex	BA21
20140501_1C87_S22	SC_UCSD_1234	20140501	Ex1	Ex1BA21	Smart+	Small	Frozen DMSO	1568-BA21-sec15	SRR3230273	Ex	BA21
20140501_1C93_S23	SC_UCSD_1189	20140501	Ex1	Ex1BA21	Smart+	Small	Frozen DMSO	1568-BA21-sec15	SRR3230228	Ex	BA21
20140605_1C13_S56	SC_UCSD_1254	20140605	Ex1	Ex1BA22	Smart+	Small	Frozen DMSO	1568-BA22-sec15	SRR3230293	Ex	BA22
20140605_1C39_S68	SC_UCSD_1251	20140605	Ex1	Ex1BA22	Smart+	Small	Frozen DMSO	1568-BA22-sec15	SRR3230290	Ex	BA22
20140605_1C49_S80	SC_UCSD_1247	20140605	Ex1	Ex1BA22	Smart+	Small	Frozen DMSO	1568-BA22-sec15	SRR3230286	Ex	BA22
20140605_1C59_S48	SC_UCSD_1242	20140605	Ex1	Ex1BA22	Smart+	Small	Frozen DMSO	1568-BA22-sec15	SRR3230281	Ex	BA22
20140605_1C69_S81	SC_UCSD_1250	20140605	Ex1	Ex1BA22	Smart+	Small	Frozen DMSO	1568-BA22-sec15	SRR3230289	Ex	BA22
20140605_1C72_S2	SC_UCSD_1235	20140605	Ex1	Ex1BA22	Smart+	Small	Frozen DMSO	1568-BA22-sec15	SRR3230274	Ex	BA22
20140605_1C75_S9	SC_UCSD_1237	20140605	Ex1	Ex1BA22	Smart+	Small	Frozen DMSO	1568-BA22-sec15	SRR3230276	Ex	BA22
20140605_1C76_S3	SC_UCSD_1243	20140605	Ex1	Ex1BA22	Smart+	Small	Frozen DMSO	1568-BA22-sec15	SRR3230282	Ex	BA22
20140605_1C77_S60	SC_UCSD_1253	20140605	Ex1	Ex1BA22	Smart+	Small	Frozen DMSO	1568-BA22-sec15	SRR3230292	Ex	BA22
20140605_1C85_S93	SC_UCSD_1241	20140605	Ex1	Ex1BA22	Smart+	Small	Frozen DMSO	1568-BA22-sec15	SRR3230280	Ex	BA22
20140605_1C94_S5	SC_UCSD_1255	20140605	Ex1	Ex1BA22	Smart+	Small	Frozen DMSO	1568-BA22-sec15	SRR3230294	Ex	BA22
20140605_1C95_S96	SC_UCSD_3949	20140605	Ex1	Ex1BA22	Smart+	Small	Frozen DMSO	1568-BA22-sec15	SRR5897270	Ex	BA22
20140702_1C05_S40	SC_UCSD_562	20140702	Ex1	Ex1BA8	Smart+	Small	Frozen DMSO	1568-BA8-sec9	SRR2137076	Ex	BA8
20140702_1C12_S33	SC_UCSD_961	20140702	Ex1	Ex1BA8	Smart+	Small	Frozen DMSO	1568-BA8-sec9	SRR2137475	Ex	BA8
20140702_1C14_S11	SC_UCSD_725	20140702	Ex1	Ex1BA8	Smart+	Small	Frozen DMSO	1568-BA8-sec9	SRR2137239	Ex	BA8
20140702_1C16_S45	SC_UCSD_566	20140702	Ex1	Ex1BA8	Smart+	Small	Frozen DMSO	1568-BA8-sec9	SRR2137080	Ex	BA8
20140702_1C24_S35	SC_UCSD_1069	20140702	Ex1	Ex1BA8	Smart+	Small	Frozen DMSO	1568-BA8-sec9	SRR2137583	Ex	BA8
20140702_1C28_S36	SC_UCSD_713	20140702	Ex1	Ex1BA8	Smart+	Small	Frozen DMSO	1568-BA8-sec9	SRR2137227	Ex	BA8
20140702_1C34_S37	SC_UCSD_687	20140702	Ex1	Ex1BA8	Smart+	Small	Frozen DMSO	1568-BA8-sec9	SRR2137201	Ex	BA8
20140702_1C48_S48	SC_UCSD_985	20140702	Ex1	Ex1BA8	Smart+	Small	Frozen DMSO	1568-BA8-sec9	SRR2137499	Ex	BA8
20140702_1C72_S56	SC_UCSD_914	20140702	Ex1	Ex1BA8	Smart+	Small	Frozen DMSO	1568-BA8-sec9	SRR2137428	Ex	BA8
20140702_1C78_S50	SC_UCSD_684	20140702	Ex1	Ex1BA8	Smart+	Small	Frozen DMSO	1568-BA8-sec9	SRR2137198	Ex	BA8
20140702_1C81_S24	SC_UCSD_974	20140702	Ex1	Ex1BA8	Smart+	Small	Frozen DMSO	1568-BA8-sec9	SRR2137488	Ex	BA8
20140702_1C88_S59	SC_UCSD_1023	20140702	Ex1	Ex1BA8	Smart+	Small	Frozen DMSO	1568-BA8-sec9	SRR2137537	Ex	BA8
20140702_1C89_S54	SC_UCSD_655	20140702	Ex1	Ex1BA8	Smart+	Small	Frozen DMSO	1568-BA8-sec9	SRR2137169	Ex	BA8
20140708_1C39_S74	SC_UCSD_901	20140708	Ex1	Ex1BA8	Smart+Poly	Small	Frozen DMSO	1568-BA8-sec9	SRR2137415	Ex	BA8
20140708_1C91_S93	SC_UCSD_832	20140708	Ex1	Ex1BA8	Smart+Poly	Small	Frozen DMSO	1568-BA8-sec9	SRR2137346	Ex	BA8
20140708_1C93_S80	SC_UCSD_878	20140708	Ex1	Ex1BA8	Smart+Poly	Small	Frozen DMSO	1568-BA8-sec9	SRR2137392	Ex	BA8
20140715_1C01_S44	SC_UCSD_1284	20140715	Ex1	Ex1BA21	Smart+	Small	Frozen DMSO	1568-BA21-sec15	SRR3230323	Ex	BA21
20140715_1C14_S41	SC_UCSD_1270	20140715	Ex1	Ex1BA21	Smart+	Small	Frozen DMSO	1568-BA21-sec15	SRR3230309	Ex	BA21
20140715_1C21_S37	SC_UCSD_1281	20140715	Ex1	Ex1BA21	Smart+	Small	Frozen DMSO	1568-BA21-sec15	SRR3230320	Ex	BA21
20140715_1C25_S38	SC_UCSD_1265	20140715	Ex1	Ex1BA21	Smart+	Small	Frozen DMSO	1568-BA21-sec15	SRR3230304	Ex	BA21
20140715_1C36_S74	SC_UCSD_1285	20140715	Ex1	Ex1BA21	Smart+	Small	Frozen DMSO	1568-BA21-sec15	SRR3230324	Ex	BA21
20140715_1C48_S75	SC_UCSD_1286	20140715	Ex1	Ex1BA21	Smart+	Small	Frozen DMSO	1568-BA21-sec15	SRR3230325	Ex	BA21
20140715_1C59_S82	SC_UCSD_1271	20140715	Ex1	Ex1BA21	Smart+	Small	Frozen DMSO	1568-BA21-sec15	SRR3230310	Ex	BA21
20140715_1C61_S48	SC_UCSD_1289	20140715	Ex1	Ex1BA21	Smart+	Small	Frozen DMSO	1568-BA21-sec15	SRR3230328	Ex	BA21
20140715_1C69_S58	SC_UCSD_1303	20140715	Ex1	Ex1BA21	Smart+	Small	Frozen DMSO	1568-BA21-sec15	SRR3230342	Ex	BA21
20140715_1C82_S89	SC_UCSD_1282	20140715	Ex1	Ex1BA21	Smart+	Small	Frozen DMSO	1568-BA21-sec15	SRR3230321	Ex	BA21
20140715_1C87_S50	SC_UCSD_1273	20140715	Ex1	Ex1BA21	Smart+	Small	Frozen DMSO	1568-BA21-sec15	SRR3230312	Ex	BA21
20140715_1C92_S56	SC_UCSD_1300	20140715	Ex1	Ex1BA21	Smart+	Small	Frozen DMSO	1568-BA21-sec15	SRR3230339	Ex	BA21
20140716_1C05_S37	SC_UCSD_1316	20140716	Ex1	Ex1BA21	Smart+	Small	Frozen DMSO	1568-BA21-sec15	SRR3230355	Ex	BA21
20140716_1C08_S1	SC_UCSD_1344	20140716	Ex1	Ex1BA21	Smart+	Small	Frozen DMSO	1568-BA21-sec15	SRR3230383	Ex	BA21
20140716_1C09_S91	SC_UCSD_1345	20140716	Ex1	Ex1BA21	Smart+	Small	Frozen DMSO	1568-BA21-sec15	SRR3230384	Ex	BA21
20140716_1C11_S38	SC_UCSD_1363	20140716	Ex1	Ex1BA21	Smart+	Small	Frozen DMSO	1568-BA21-sec15	SRR3230402	Ex	BA21
20140716_1C13_S9	SC_UCSD_1341	20140716	Ex1	Ex1BA21	Smart+	Small	Frozen DMSO	1568-BA21-sec15	SRR3230380	Ex	BA21
20140716_1C16_S46	SC_UCSD_1310	20140716	Ex1	Ex1BA21	Smart+	Small	Frozen DMSO	1568-BA21-sec15	SRR3230349	Ex	BA21
20140716_1C17_S39	SC_UCSD_1338	20140716	Ex1	Ex1BA21	Smart+	Small	Frozen DMSO	1568-BA21-sec15	SRR3230377	Ex	BA21
20140716_1C20_S3	SC_UCSD_1328	20140716	Ex1	Ex1BA21	Smart+	Small	Frozen DMSO	1568-BA21-sec15	SRR3230367	Ex	BA21
20140716_1C23_S40	SC_UCSD_1317	20140716	Ex1	Ex1BA21	Smart+	Small	Frozen DMSO	1568-BA21-sec15	SRR3230356	Ex	BA21
20140716_1C27_S10	SC_UCSD_1314	20140716	Ex1	Ex1BA21	Smart+	Small	Frozen DMSO	1568-BA21-sec15	SRR3230353	Ex	BA21
20140716_1C29_S41	SC_UCSD_1312	20140716	Ex1	Ex1BA21	Smart+	Small	Frozen DMSO	1568-BA21-sec15	SRR3230351	Ex	BA21
20140716_1C31_S94	SC_UCSD_1333	20140716	Ex1	Ex1BA21	Smart+	Small	Frozen DMSO	1568-BA21-sec15	SRR3230372	Ex	BA21
20140716_1C35_S42	SC_UCSD_1352	20140716	Ex1	Ex1BA21	Smart+	Small	Frozen DMSO	1568-BA21-sec15	SRR3230391	Ex	BA21
20140716_1C38_S6	SC_UCSD_1358	20140716	Ex1	Ex1BA21	Smart+	Small	Frozen DMSO	1568-BA21-sec15	SRR3230397	Ex	BA21
20140716_1C41_S43	SC_UCSD_1320	20140716	Ex1	Ex1BA21	Smart+	Small	Frozen DMSO	1568-BA21-sec15	SRR3230359	Ex	BA21
20140716_1C45_S12	SC_UCSD_1326	20140716	Ex1	Ex1BA21	Smart+	Small	Frozen DMSO	1568-BA21-sec15	SRR3230365	Ex	BA21
20140716_1C57_S26	SC_UCSD_1307	20140716	Ex1	Ex1BA21	Smart+	Small	Frozen DMSO	1568-BA21-sec15	SRR3230346	Ex	BA21
20140716_1C61_S14	SC_UCSD_1353	20140716	Ex1	Ex1BA21	Smart+	Small	Frozen DMSO	1568-BA21-sec15	SRR3230392	Ex	BA21
20140716_1C62_S21	SC_UCSD_1351	20140716	Ex1	Ex1BA21	Smart+	Small	Frozen DMSO	1568-BA21-sec15	SRR3230390	Ex	BA21
20140716_1C64_S50	SC_UCSD_1308	20140716	Ex1	Ex1BA21	Smart+	Small	Frozen DMSO	1568-BA21-sec15	SRR3230347	Ex	BA21
20140716_1C67_S15	SC_UCSD_1360	20140716	Ex1	Ex1BA21	Smart+	Small	Frozen DMSO	1568-BA21-sec15	SRR3230399	Ex	BA21
20140716_1C69_S28	SC_UCSD_1335	20140716	Ex1	Ex1BA21	Smart+	Small	Frozen DMSO	1568-BA21-sec15	SRR3230374	Ex	BA21
20140716_1C71_S59	SC_UCSD_1323	20140716	Ex1	Ex1BA21	Smart+	Small	Frozen DMSO	1568-BA21-sec15	SRR3230362	Ex	BA21
20140716_1C81_S17	SC_UCSD_1331	20140716	Ex1	Ex1BA21	Smart+	Small	Frozen DMSO	1568-BA21-sec15	SRR3230370	Ex	BA21
20140716_1C83_S61	SC_UCSD_1309	20140716	Ex1	Ex1BA21	Smart+	Small	Frozen DMSO	1568-BA21-sec15	SRR3230348	Ex	BA21
20140716_1C85_S31	SC_UCSD_1305	20140716	Ex1	Ex1BA21	Smart+	Small	Frozen DMSO	1568-BA21-sec15	SRR3230344	Ex	BA21
20140716_1C89_S62	SC_UCSD_1318	20140716	Ex1	Ex1BA21	Smart+	Small	Frozen DMSO	1568-BA21-sec15	SRR3230357	Ex	BA21
20140716_1C90_S54	SC_UCSD_1361	20140716	Ex1	Ex1BA21	Smart+	Small	Frozen DMSO	1568-BA21-sec15	SRR3230400	Ex	BA21
20140716_1C91_S32	SC_UCSD_1334	20140716	Ex1	Ex1BA21	Smart+	Small	Frozen DMSO	1568-BA21-sec15	SRR3230373	Ex	BA21
20140716_1C93_S19	SC_UCSD_1350	20140716	Ex1	Ex1BA21	Smart+	Small	Frozen DMSO	1568-BA21-sec15	SRR3230389	Ex	BA21
20140716_1C94_S66	SC_UCSD_1354	20140716	Ex1	Ex1BA21	Smart+	Small	Frozen DMSO	1568-BA21-sec15	SRR3230393	Ex	BA21
20140722_1C08_S74	SC_UCSD_1374	20140722	Ex1	Ex1BA21	Smart+	Small	Frozen DMSO	1568-BA21-sec15	SRR3230413	Ex	BA21
20140722_1C09_S68	SC_UCSD_1384	20140722	Ex1	Ex1BA21	Smart+	Small	Frozen DMSO	1568-BA21-sec15	SRR3230423	Ex	BA21
20140722_1C19_S79	SC_UCSD_1372	20140722	Ex1	Ex1BA21	Smart+	Small	Frozen DMSO	1568-BA21-sec15	SRR3230411	Ex	BA21
20140722_1C31_S71	SC_UCSD_1382	20140722	Ex1	Ex1BA21	Smart+	Small	Frozen DMSO	1568-BA21-sec15	SRR3230421	Ex	BA21
20140722_1C45_S80	SC_UCSD_3926	20140722	Ex1	Ex1BA21	Smart+	Small	Frozen DMSO	1568-BA21-sec15	SRR5897247	Ex	BA21
20140722_1C49_S81	SC_UCSD_1370	20140722	Ex1	Ex1BA21	Smart+	Small	Frozen DMSO	1568-BA21-sec15	SRR3230409	Ex	BA21
20140722_1C80_S90	SC_UCSD_1378	20140722	Ex1	Ex1BA21	Smart+	Small	Frozen DMSO	1568-BA21-sec15	SRR3230417	Ex	BA21
20140722_1C86_S91	SC_UCSD_3925	20140722	Ex1	Ex1BA21	Smart+	Small	Frozen DMSO	1568-BA21-sec15	SRR5897246	Ex	BA21
20140722_1C93_S85	SC_UCSD_1373	20140722	Ex1	Ex1BA21	Smart+	Small	Frozen DMSO	1568-BA21-sec15	SRR3230412	Ex	BA21
20140723_1C04_S7	SC_UCSD_1432	20140723	Ex1	Ex1BA21	Smart+	Small	Frozen DMSO	1568-BA21-sec15	SRR3230471	Ex	BA21
20140723_1C08_S85	SC_UCSD_1429	20140723	Ex1	Ex1BA21	Smart+	Small	Frozen DMSO	1568-BA21-sec15	SRR3230468	Ex	BA21
20140723_1C11_S42	SC_UCSD_1399	20140723	Ex1	Ex1BA21	Smart+	Small	Frozen DMSO	1568-BA21-sec15	SRR3230438	Ex	BA21
20140723_1C17_S54	SC_UCSD_1398	20140723	Ex1	Ex1BA21	Smart+	Small	Frozen DMSO	1568-BA21-sec15	SRR3230437	Ex	BA21
20140723_1C31_S37	SC_UCSD_1420	20140723	Ex1	Ex1BA21	Smart+	Small	Frozen DMSO	1568-BA21-sec15	SRR3230459	Ex	BA21
20140723_1C34_S6	SC_UCSD_1390	20140723	Ex1	Ex1BA21	Smart+	Small	Frozen DMSO	1568-BA21-sec15	SRR3230429	Ex	BA21
20140723_1C43_S61	SC_UCSD_1401	20140723	Ex1	Ex1BA21	Smart+	Small	Frozen DMSO	1568-BA21-sec15	SRR3230440	Ex	BA21
20140723_1C55_S15	SC_UCSD_1396	20140723	Ex1	Ex1BA21	Smart+	Small	Frozen DMSO	1568-BA21-sec15	SRR3230435	Ex	BA21
20140723_1C59_S8	SC_UCSD_3937	20140723	Ex1	Ex1BA21	Smart+	Small	Frozen DMSO	1568-BA21-sec15	SRR5897258	Ex	BA21
20140723_1C65_S20	SC_UCSD_1404	20140723	Ex1	Ex1BA21	Smart+	Small	Frozen DMSO	1568-BA21-sec15	SRR3230443	Ex	BA21
20140723_1C74_S16	SC_UCSD_1422	20140723	Ex1	Ex1BA21	Smart+	Small	Frozen DMSO	1568-BA21-sec15	SRR3230461	Ex	BA21
20140723_1C81_S51	SC_UCSD_1389	20140723	Ex1	Ex1BA21	Smart+	Small	Frozen DMSO	1568-BA21-sec15	SRR3230428	Ex	BA21
20140724_1C06_S72	SC_UCSD_1460	20140724	Ex1	Ex1BA21	Smart+	Small	Frozen DMSO	1568-BA21-sec15	SRR3230499	Ex	BA21
20140724_1C19_S82	SC_UCSD_1478	20140724	Ex1	Ex1BA21	Smart+	Small	Frozen DMSO	1568-BA21-sec15	SRR3230517	Ex	BA21
20140724_1C26_S22	SC_UCSD_1461	20140724	Ex1	Ex1BA21	Smart+	Small	Frozen DMSO	1568-BA21-sec15	SRR3230500	Ex	BA21
20140724_1C27_S94	SC_UCSD_1470	20140724	Ex1	Ex1BA21	Smart+	Small	Frozen DMSO	1568-BA21-sec15	SRR3230509	Ex	BA21
20140724_1C30_S2	SC_UCSD_1465	20140724	Ex1	Ex1BA21	Smart+	Small	Frozen DMSO	1568-BA21-sec15	SRR3230504	Ex	BA21
20140724_1C50_S95	SC_UCSD_1450	20140724	Ex1	Ex1BA21	Smart+	Small	Frozen DMSO	1568-BA21-sec15	SRR3230489	Ex	BA21
20140724_1C63_S48	SC_UCSD_1459	20140724	Ex1	Ex1BA21	Smart+	Small	Frozen DMSO	1568-BA21-sec15	SRR3230498	Ex	BA21
20140724_1C67_S71	SC_UCSD_1448	20140724	Ex1	Ex1BA21	Smart+	Small	Frozen DMSO	1568-BA21-sec15	SRR3230487	Ex	BA21
20140724_1C71_S39	SC_UCSD_1474	20140724	Ex1	Ex1BA21	Smart+	Small	Frozen DMSO	1568-BA21-sec15	SRR3230513	Ex	BA21
20140724_1C76_S16	SC_UCSD_1452	20140724	Ex1	Ex1BA21	Smart+	Small	Frozen DMSO	1568-BA21-sec15	SRR3230491	Ex	BA21
20140724_1C77_S51	SC_UCSD_1453	20140724	Ex1	Ex1BA21	Smart+	Small	Frozen DMSO	1568-BA21-sec15	SRR3230492	Ex	BA21
20140724_1C82_S28	SC_UCSD_1445	20140724	Ex1	Ex1BA21	Smart+	Small	Frozen DMSO	1568-BA21-sec15	SRR3230484	Ex	BA21
20140724_1C89_S75	SC_UCSD_1462	20140724	Ex1	Ex1BA21	Smart+	Small	Frozen DMSO	1568-BA21-sec15	SRR3230501	Ex	BA21
20140724_1C94_S40	SC_UCSD_1451	20140724	Ex1	Ex1BA21	Smart+	Small	Frozen DMSO	1568-BA21-sec15	SRR3230490	Ex	BA21
20140815A_1C07_S88	SC_UCSD_1573	20140815A	Ex1	Ex1BA21	Smart+	Small	Frozen DMSO	1568-BA21-sec15	SRR3230612	Ex	BA21
20140815A_1C11_S43	SC_UCSD_1594	20140815A	Ex1	Ex1BA21	Smart+	Small	Frozen DMSO	1568-BA21-sec15	SRR3230633	Ex	BA21
20140815A_1C19_S5	SC_UCSD_1571	20140815A	Ex1	Ex1BA21	Smart+	Small	Frozen DMSO	1568-BA21-sec15	SRR3230610	Ex	BA21
20140815A_1C25_S63	SC_UCSD_1587	20140815A	Ex1	Ex1BA21	Smart+	Small	Frozen DMSO	1568-BA21-sec15	SRR3230626	Ex	BA21
20140815A_1C44_S76	SC_UCSD_1585	20140815A	Ex1	Ex1BA21	Smart+	Small	Frozen DMSO	1568-BA21-sec15	SRR3230624	Ex	BA21
20140815A_1C54_S81	SC_UCSD_1567	20140815A	Ex1	Ex1BA21	Smart+	Small	Frozen DMSO	1568-BA21-sec15	SRR3230606	Ex	BA21
20140815A_1C55_S17	SC_UCSD_1597	20140815A	Ex1	Ex1BA21	Smart+	Small	Frozen DMSO	1568-BA21-sec15	SRR3230636	Ex	BA21
20140815A_1C58_S44	SC_UCSD_1560	20140815A	Ex1	Ex1BA21	Smart+	Small	Frozen DMSO	1568-BA21-sec15	SRR3230599	Ex	BA21
20140815A_1C61_S29	SC_UCSD_1576	20140815A	Ex1	Ex1BA21	Smart+	Small	Frozen DMSO	1568-BA21-sec15	SRR3230615	Ex	BA21
20140815A_1C62_S77	SC_UCSD_1601	20140815A	Ex1	Ex1BA21	Smart+	Small	Frozen DMSO	1568-BA21-sec15	SRR3230640	Ex	BA21
20140815A_1C65_S21	SC_UCSD_1586	20140815A	Ex1	Ex1BA21	Smart+	Small	Frozen DMSO	1568-BA21-sec15	SRR3230625	Ex	BA21
20140815A_1C72_S10	SC_UCSD_1566	20140815A	Ex1	Ex1BA21	Smart+	Small	Frozen DMSO	1568-BA21-sec15	SRR3230605	Ex	BA21
20140815A_1C73_S42	SC_UCSD_1603	20140815A	Ex1	Ex1BA21	Smart+	Small	Frozen DMSO	1568-BA21-sec15	SRR3230642	Ex	BA21
20140815A_1C76_S22	SC_UCSD_1598	20140815A	Ex1	Ex1BA21	Smart+	Small	Frozen DMSO	1568-BA21-sec15	SRR3230637	Ex	BA21
20140815A_1C77_S45	SC_UCSD_1596	20140815A	Ex1	Ex1BA21	Smart+	Small	Frozen DMSO	1568-BA21-sec15	SRR3230635	Ex	BA21
20140815A_1C86_S18	SC_UCSD_1581	20140815A	Ex1	Ex1BA21	Smart+	Small	Frozen DMSO	1568-BA21-sec15	SRR3230620	Ex	BA21
20140815A_1C87_S41	SC_UCSD_1553	20140815A	Ex1	Ex1BA21	Smart+	Small	Frozen DMSO	1568-BA21-sec15	SRR3230592	Ex	BA21
20140815A_1C88_S34	SC_UCSD_1569	20140815A	Ex1	Ex1BA21	Smart+	Small	Frozen DMSO	1568-BA21-sec15	SRR3230608	Ex	BA21
20140815A_1C90_S80	SC_UCSD_1595	20140815A	Ex1	Ex1BA21	Smart+	Small	Frozen DMSO	1568-BA21-sec15	SRR3230634	Ex	BA21
20140815A_1C95_S69	SC_UCSD_1557	20140815A	Ex1	Ex1BA21	Smart+	Small	Frozen DMSO	1568-BA21-sec15	SRR3230596	Ex	BA21
20140815A_1C96_S92	SC_UCSD_1579	20140815A	Ex1	Ex1BA21	Smart+	Small	Frozen DMSO	1568-BA21-sec15	SRR3230618	Ex	BA21
20140815B_1C05_S3	SC_UCSD_1624	20140815B	Ex1	Ex1BA21	Smart+	Small	Frozen DMSO	1568-BA21-sec15	SRR3230663	Ex	BA21
20140815B_1C12_S24	SC_UCSD_1632	20140815B	Ex1	Ex1BA21	Smart+	Small	Frozen DMSO	1568-BA21-sec15	SRR3230671	Ex	BA21
20140815B_1C13_S83	SC_UCSD_1644	20140815B	Ex1	Ex1BA21	Smart+	Small	Frozen DMSO	1568-BA21-sec15	SRR3230683	Ex	BA21
20140815B_1C19_S95	SC_UCSD_1611	20140815B	Ex1	Ex1BA21	Smart+	Small	Frozen DMSO	1568-BA21-sec15	SRR3230650	Ex	BA21
20140815B_1C21_S70	SC_UCSD_1651	20140815B	Ex1	Ex1BA21	Smart+	Small	Frozen DMSO	1568-BA21-sec15	SRR3230690	Ex	BA21
20140815B_1C23_S25	SC_UCSD_1629	20140815B	Ex1	Ex1BA21	Smart+	Small	Frozen DMSO	1568-BA21-sec15	SRR3230668	Ex	BA21
20140815B_1C25_S82	SC_UCSD_1619	20140815B	Ex1	Ex1BA21	Smart+	Small	Frozen DMSO	1568-BA21-sec15	SRR3230658	Ex	BA21
20140815B_1C26_S35	SC_UCSD_1641	20140815B	Ex1	Ex1BA21	Smart+	Small	Frozen DMSO	1568-BA21-sec15	SRR3230680	Ex	BA21
20140815B_1C31_S94	SC_UCSD_1614	20140815B	Ex1	Ex1BA21	Smart+	Small	Frozen DMSO	1568-BA21-sec15	SRR3230653	Ex	BA21
20140815B_1C38_S47	SC_UCSD_1625	20140815B	Ex1	Ex1BA21	Smart+	Small	Frozen DMSO	1568-BA21-sec15	SRR3230664	Ex	BA21
20140815B_1C40_S79	SC_UCSD_1628	20140815B	Ex1	Ex1BA21	Smart+	Small	Frozen DMSO	1568-BA21-sec15	SRR3230667	Ex	BA21
20140815B_1C41_S58	SC_UCSD_3958	20140815B	Ex1	Ex1BA21	Smart+	Small	Frozen DMSO	1568-BA21-sec15	SRR5897279	Ex	BA21
20140815B_1C44_S59	SC_UCSD_1656	20140815B	Ex1	Ex1BA21	Smart+	Small	Frozen DMSO	1568-BA21-sec15	SRR3230695	Ex	BA21
20140815B_1C49_S48	SC_UCSD_1618	20140815B	Ex1	Ex1BA21	Smart+	Small	Frozen DMSO	1568-BA21-sec15	SRR3230657	Ex	BA21
20140815B_1C51_S45	SC_UCSD_1620	20140815B	Ex1	Ex1BA21	Smart+	Small	Frozen DMSO	1568-BA21-sec15	SRR3230659	Ex	BA21
20140815B_1C57_S56	SC_UCSD_1650	20140815B	Ex1	Ex1BA21	Smart+	Small	Frozen DMSO	1568-BA21-sec15	SRR3230689	Ex	BA21
20140815B_1C60_S27	SC_UCSD_1613	20140815B	Ex1	Ex1BA21	Smart+	Small	Frozen DMSO	1568-BA21-sec15	SRR3230652	Ex	BA21
20140815B_1C63_S67	SC_UCSD_1646	20140815B	Ex1	Ex1BA21	Smart+	Small	Frozen DMSO	1568-BA21-sec15	SRR3230685	Ex	BA21
20140815B_1C67_S72	SC_UCSD_1652	20140815B	Ex1	Ex1BA21	Smart+	Small	Frozen DMSO	1568-BA21-sec15	SRR3230691	Ex	BA21
20140815B_1C69_S78	SC_UCSD_1655	20140815B	Ex1	Ex1BA21	Smart+	Small	Frozen DMSO	1568-BA21-sec15	SRR3230694	Ex	BA21
20140815B_1C70_S37	SC_UCSD_1636	20140815B	Ex1	Ex1BA21	Smart+	Small	Frozen DMSO	1568-BA21-sec15	SRR3230675	Ex	BA21
20140815B_1C72_S49	SC_UCSD_1608	20140815B	Ex1	Ex1BA21	Smart+	Small	Frozen DMSO	1568-BA21-sec15	SRR3230647	Ex	BA21
20140815B_1C83_S5	SC_UCSD_1617	20140815B	Ex1	Ex1BA21	Smart+	Small	Frozen DMSO	1568-BA21-sec15	SRR3230656	Ex	BA21
20140815B_1C93_S12	SC_UCSD_1648	20140815B	Ex1	Ex1BA21	Smart+	Small	Frozen DMSO	1568-BA21-sec15	SRR3230687	Ex	BA21
20140819_1C06_S67	SC_UCSD_1507	20140819	Ex1	Ex1BA41	Smart+	Small	Frozen DMSO	1568-BA41/BA42-sec17	SRR3230546	Ex	BA41
20140819_1C18_S79	SC_UCSD_1510	20140819	Ex1	Ex1BA41	Smart+	Small	Frozen DMSO	1568-BA41/BA42-sec17	SRR3230549	Ex	BA41
20140819_1C23_S20	SC_UCSD_1499	20140819	Ex1	Ex1BA41	Smart+	Small	Frozen DMSO	1568-BA41/BA42-sec17	SRR3230538	Ex	BA41
20140819_1C29_S32	SC_UCSD_1504	20140819	Ex1	Ex1BA41	Smart+	Small	Frozen DMSO	1568-BA41/BA42-sec17	SRR3230543	Ex	BA41
20140819_1C31_S76	SC_UCSD_1491	20140819	Ex1	Ex1BA41	Smart+	Small	Frozen DMSO	1568-BA41/BA42-sec17	SRR3230530	Ex	BA41
20140819_1C34_S91	SC_UCSD_1519	20140819	Ex1	Ex1BA41	Smart+	Small	Frozen DMSO	1568-BA41/BA42-sec17	SRR3230558	Ex	BA41
20140819_1C36_S21	SC_UCSD_1505	20140819	Ex1	Ex1BA41	Smart+	Small	Frozen DMSO	1568-BA41/BA42-sec17	SRR3230544	Ex	BA41
20140819_1C39_S65	SC_UCSD_1511	20140819	Ex1	Ex1BA41	Smart+	Small	Frozen DMSO	1568-BA41/BA42-sec17	SRR3230550	Ex	BA41
20140819_1C43_S5	SC_UCSD_1492	20140819	Ex1	Ex1BA41	Smart+	Small	Frozen DMSO	1568-BA41/BA42-sec17	SRR3230531	Ex	BA41
20140819_1C45_S77	SC_UCSD_1517	20140819	Ex1	Ex1BA41	Smart+	Small	Frozen DMSO	1568-BA41/BA42-sec17	SRR3230556	Ex	BA41
20140819_1C47_S68	SC_UCSD_1483	20140819	Ex1	Ex1BA41	Smart+	Small	Frozen DMSO	1568-BA41/BA42-sec17	SRR3230522	Ex	BA41
20140819_1C49_S89	SC_UCSD_1493	20140819	Ex1	Ex1BA41	Smart+	Small	Frozen DMSO	1568-BA41/BA42-sec17	SRR3230532	Ex	BA41
20140819_1C55_S6	SC_UCSD_1486	20140819	Ex1	Ex1BA41	Smart+	Small	Frozen DMSO	1568-BA41/BA42-sec17	SRR3230525	Ex	BA41
20140819_1C61_S18	SC_UCSD_1498	20140819	Ex1	Ex1BA41	Smart+	Small	Frozen DMSO	1568-BA41/BA42-sec17	SRR3230537	Ex	BA41
20140819_1C82_S22	SC_UCSD_1503	20140819	Ex1	Ex1BA41	Smart+	Small	Frozen DMSO	1568-BA41/BA42-sec17	SRR3230542	Ex	BA41
20140819_1C85_S43	SC_UCSD_1515	20140819	Ex1	Ex1BA41	Smart+	Small	Frozen DMSO	1568-BA41/BA42-sec17	SRR3230554	Ex	BA41
20140819_1C91_S55	SC_UCSD_1516	20140819	Ex1	Ex1BA41	Smart+	Small	Frozen DMSO	1568-BA41/BA42-sec17	SRR3230555	Ex	BA41
20140819_1C94_S34	SC_UCSD_1506	20140819	Ex1	Ex1BA41	Smart+	Small	Frozen DMSO	1568-BA41/BA42-sec17	SRR3230545	Ex	BA41
20140826_1C10_S49	SC_UCSD_1530	20140826	Ex1	Ex1BA41	Smart+	Small	Frozen DMSO	1568-BA41/BA42-sec17	SRR3230569	Ex	BA41
20140826_1C11_S1	SC_UCSD_1541	20140826	Ex1	Ex1BA41	Smart+	Small	Frozen DMSO	1568-BA41/BA42-sec17	SRR3230580	Ex	BA41
20140826_1C23_S13	SC_UCSD_1536	20140826	Ex1	Ex1BA41	Smart+	Small	Frozen DMSO	1568-BA41/BA42-sec17	SRR3230575	Ex	BA41
20140826_1C29_S25	SC_UCSD_1526	20140826	Ex1	Ex1BA41	Smart+	Small	Frozen DMSO	1568-BA41/BA42-sec17	SRR3230565	Ex	BA41
20140826_1C30_S61	SC_UCSD_1538	20140826	Ex1	Ex1BA41	Smart+	Small	Frozen DMSO	1568-BA41/BA42-sec17	SRR3230577	Ex	BA41
20140826_1C31_S70	SC_UCSD_1540	20140826	Ex1	Ex1BA41	Smart+	Small	Frozen DMSO	1568-BA41/BA42-sec17	SRR3230579	Ex	BA41
20140826_1C39_S47	SC_UCSD_1531	20140826	Ex1	Ex1BA41	Smart+	Small	Frozen DMSO	1568-BA41/BA42-sec17	SRR3230570	Ex	BA41
20140826_1C44_S23	SC_UCSD_1535	20140826	Ex1	Ex1BA41	Smart+	Small	Frozen DMSO	1568-BA41/BA42-sec17	SRR3230574	Ex	BA41
20140826_1C45_S59	SC_UCSD_1546	20140826	Ex1	Ex1BA41	Smart+	Small	Frozen DMSO	1568-BA41/BA42-sec17	SRR3230585	Ex	BA41
20140826_1C46_S96	SC_UCSD_1534	20140826	Ex1	Ex1BA41	Smart+	Small	Frozen DMSO	1568-BA41/BA42-sec17	SRR3230573	Ex	BA41
20140826_1C47_S37	SC_UCSD_1543	20140826	Ex1	Ex1BA41	Smart+	Small	Frozen DMSO	1568-BA41/BA42-sec17	SRR3230582	Ex	BA41
20140826_1C59_S62	SC_UCSD_1533	20140826	Ex1	Ex1BA41	Smart+	Small	Frozen DMSO	1568-BA41/BA42-sec17	SRR3230572	Ex	BA41
20140826_1C64_S85	SC_UCSD_1520	20140826	Ex1	Ex1BA41	Smart+	Small	Frozen DMSO	1568-BA41/BA42-sec17	SRR3230559	Ex	BA41
20140826_1C70_S2	SC_UCSD_1551	20140826	Ex1	Ex1BA41	Smart+	Small	Frozen DMSO	1568-BA41/BA42-sec17	SRR3230590	Ex	BA41
20140826_1C77_S74	SC_UCSD_1548	20140826	Ex1	Ex1BA41	Smart+	Small	Frozen DMSO	1568-BA41/BA42-sec17	SRR3230587	Ex	BA41
20140826_1C83_S86	SC_UCSD_1524	20140826	Ex1	Ex1BA41	Smart+	Small	Frozen DMSO	1568-BA41/BA42-sec17	SRR3230563	Ex	BA41
20140826_1C84_S26	SC_UCSD_1523	20140826	Ex1	Ex1BA41	Smart+	Small	Frozen DMSO	1568-BA41/BA42-sec17	SRR3230562	Ex	BA41
20140826_1C85_S84	SC_UCSD_1542	20140826	Ex1	Ex1BA41	Smart+	Small	Frozen DMSO	1568-BA41/BA42-sec17	SRR3230581	Ex	BA41
20140827A_1C03_S1	SC_UCSD_1681	20140827A	Ex1	Ex1BA10	Smart+	Small	None	1568-BA10-sec1	SRR3230720	Ex	BA10
20140827A_1C23_S42	SC_UCSD_1693	20140827A	Ex1	Ex1BA10	Smart+	Small	None	1568-BA10-sec1	SRR3230732	Ex	BA10
20140827A_1C25_S27	SC_UCSD_1713	20140827A	Ex1	Ex1BA10	Smart+	Small	None	1568-BA10-sec1	SRR3230752	Ex	BA10
20140827A_1C32_S2	SC_UCSD_1711	20140827A	Ex1	Ex1BA10	Smart+	Small	None	1568-BA10-sec1	SRR3230750	Ex	BA10
20140827A_1C37_S33	SC_UCSD_1699	20140827A	Ex1	Ex1BA10	Smart+	Small	None	1568-BA10-sec1	SRR3230738	Ex	BA10
20140827A_1C50_S3	SC_UCSD_1680	20140827A	Ex1	Ex1BA10	Smart+	Small	None	1568-BA10-sec1	SRR3230719	Ex	BA10
20140827A_1C57_S41	SC_UCSD_1683	20140827A	Ex1	Ex1BA10	Smart+	Small	None	1568-BA10-sec1	SRR3230722	Ex	BA10
20140827A_1C60_S32	SC_UCSD_1677	20140827A	Ex1	Ex1BA10	Smart+	Small	None	1568-BA10-sec1	SRR3230716	Ex	BA10
20140827A_1C63_S47	SC_UCSD_1720	20140827A	Ex1	Ex1BA10	Smart+	Small	None	1568-BA10-sec1	SRR3230759	Ex	BA10
20140827A_1C66_S38	SC_UCSD_1706	20140827A	Ex1	Ex1BA10	Smart+	Small	None	1568-BA10-sec1	SRR3230745	Ex	BA10
20140827A_1C69_S4	SC_UCSD_1685	20140827A	Ex1	Ex1BA10	Smart+	Small	None	1568-BA10-sec1	SRR3230724	Ex	BA10
20140827A_1C74_S17	SC_UCSD_1705	20140827A	Ex1	Ex1BA10	Smart+	Small	None	1568-BA10-sec1	SRR3230744	Ex	BA10
20140827A_1C90_S13	SC_UCSD_1687	20140827A	Ex1	Ex1BA10	Smart+	Small	None	1568-BA10-sec1	SRR3230726	Ex	BA10
20140909A_1C01_S62	SC_UCSD_1724	20140909A	Ex1	Ex1BA22	Smart+	Small	Frozen DMSO	1568-BA22-sec15	SRR3230763	Ex	BA22
20140909A_1C06_S17	SC_UCSD_1732	20140909A	Ex1	Ex1BA22	Smart+	Small	Frozen DMSO	1568-BA22-sec15	SRR3230771	Ex	BA22
20140909A_1C13_S86	SC_UCSD_1739	20140909A	Ex1	Ex1BA22	Smart+	Small	Frozen DMSO	1568-BA22-sec15	SRR3230778	Ex	BA22
20140909A_1C16_S30	SC_UCSD_1744	20140909A	Ex1	Ex1BA22	Smart+	Small	Frozen DMSO	1568-BA22-sec15	SRR3230783	Ex	BA22
20140909A_1C25_S49	SC_UCSD_1749	20140909A	Ex1	Ex1BA22	Smart+	Small	Frozen DMSO	1568-BA22-sec15	SRR3230788	Ex	BA22
20140909A_1C28_S53	SC_UCSD_1742	20140909A	Ex1	Ex1BA22	Smart+	Small	Frozen DMSO	1568-BA22-sec15	SRR3230781	Ex	BA22
20140909A_1C32_S26	SC_UCSD_1725	20140909A	Ex1	Ex1BA22	Smart+	Small	Frozen DMSO	1568-BA22-sec15	SRR3230764	Ex	BA22
20140909A_1C33_S15	SC_UCSD_3960	20140909A	Ex1	Ex1BA22	Smart+	Small	Frozen DMSO	1568-BA22-sec15	SRR5897281	Ex	BA22
20140909A_1C50_S87	SC_UCSD_1761	20140909A	Ex1	Ex1BA22	Smart+	Small	Frozen DMSO	1568-BA22-sec15	SRR3230800	Ex	BA22
20140909A_1C51_S40	SC_UCSD_1762	20140909A	Ex1	Ex1BA22	Smart+	Small	Frozen DMSO	1568-BA22-sec15	SRR3230801	Ex	BA22
20140909A_1C55_S39	SC_UCSD_1753	20140909A	Ex1	Ex1BA22	Smart+	Small	Frozen DMSO	1568-BA22-sec15	SRR3230792	Ex	BA22
20140909A_1C63_S64	SC_UCSD_1747	20140909A	Ex1	Ex1BA22	Smart+	Small	Frozen DMSO	1568-BA22-sec15	SRR3230786	Ex	BA22
20140909A_1C78_S90	SC_UCSD_1741	20140909A	Ex1	Ex1BA22	Smart+	Small	Frozen DMSO	1568-BA22-sec15	SRR3230780	Ex	BA22
20140909B_1C13_S89	SC_UCSD_1775	20140909B	Ex1	Ex1BA41	Smart+	Small	None	1568-BA41/BA42-sec17	SRR3230813	Ex	BA41
20140909B_1C28_S78	SC_UCSD_1778	20140909B	Ex1	Ex1BA41	Smart+	Small	None	1568-BA41/BA42-sec17	SRR3230816	Ex	BA41
20140909B_1C43_S41	SC_UCSD_1770	20140909B	Ex1	Ex1BA41	Smart+	Small	None	1568-BA41/BA42-sec17	SRR3230809	Ex	BA41
20140909B_1C45_S42	SC_UCSD_1765	20140909B	Ex1	Ex1BA41	Smart+	Small	None	1568-BA41/BA42-sec17	SRR3230804	Ex	BA41
20140909B_1C87_S54	SC_UCSD_1771	20140909B	Ex1	Ex1BA41	Smart+	Small	None	1568-BA41/BA42-sec17	SRR3230810	Ex	BA41
20140909B_1C88_S55	SC_UCSD_1776	20140909B	Ex1	Ex1BA41	Smart+	Small	None	1568-BA41/BA42-sec17	SRR3230814	Ex	BA41
20140909B_1C94_S67	SC_UCSD_1772	20140909B	Ex1	Ex1BA41	Smart+	Small	None	1568-BA41/BA42-sec17	SRR3230811	Ex	BA41
20140930A_1C12_S11	SC_UCSD_1781	20140930A	Ex1	Ex1BA10	Smart+Poly	Small	None	1568-BA10-sec1	SRR3230819	Ex	BA10
20140930A_1C32_S92	SC_UCSD_1792	20140930A	Ex1	Ex1BA10	Smart+Poly	Small	None	1568-BA10-sec1	SRR3230830	Ex	BA10
20140930A_1C34_S35	SC_UCSD_1810	20140930A	Ex1	Ex1BA10	Smart+Poly	Small	None	1568-BA10-sec1	SRR3230848	Ex	BA10
20140930A_1C48_S60	SC_UCSD_1796	20140930A	Ex1	Ex1BA10	Smart+Poly	Small	None	1568-BA10-sec1	SRR3230834	Ex	BA10
20140930A_1C72_S49	SC_UCSD_1802	20140930A	Ex1	Ex1BA10	Smart+Poly	Small	None	1568-BA10-sec1	SRR3230840	Ex	BA10
20140930A_1C87_S10	SC_UCSD_1813	20140930A	Ex1	Ex1BA10	Smart+Poly	Small	None	1568-BA10-sec1	SRR3230851	Ex	BA10
20140930B_1C12_S53	SC_UCSD_1851	20140930B	Ex1	Ex1BA10	Smart+Poly	Small	Frozen DMSO	1568-BA10-sec1	SRR3230889	Ex	BA10
20140930B_1C21_S14	SC_UCSD_1834	20140930B	Ex1	Ex1BA10	Smart+Poly	Small	Frozen DMSO	1568-BA10-sec1	SRR3230872	Ex	BA10
20140930B_1C22_S30	SC_UCSD_1846	20140930B	Ex1	Ex1BA10	Smart+Poly	Small	Frozen DMSO	1568-BA10-sec1	SRR3230884	Ex	BA10
20140930B_1C24_S65	SC_UCSD_1832	20140930B	Ex1	Ex1BA10	Smart+Poly	Small	Frozen DMSO	1568-BA10-sec1	SRR3230870	Ex	BA10
20140930B_1C27_S51	SC_UCSD_1839	20140930B	Ex1	Ex1BA10	Smart+Poly	Small	Frozen DMSO	1568-BA10-sec1	SRR3230877	Ex	BA10
20140930B_1C32_S3	SC_UCSD_1844	20140930B	Ex1	Ex1BA10	Smart+Poly	Small	Frozen DMSO	1568-BA10-sec1	SRR3230882	Ex	BA10
20140930B_1C71_S90	SC_UCSD_1862	20140930B	Ex1	Ex1BA10	Smart+Poly	Small	Frozen DMSO	1568-BA10-sec1	SRR3230900	Ex	BA10
20140930B_1C81_S40	SC_UCSD_1848	20140930B	Ex1	Ex1BA10	Smart+Poly	Small	Frozen DMSO	1568-BA10-sec1	SRR3230886	Ex	BA10
20140930B_1C87_S52	SC_UCSD_1825	20140930B	Ex1	Ex1BA10	Smart+Poly	Small	Frozen DMSO	1568-BA10-sec1	SRR3230863	Ex	BA10
20140930B_1C88_S55	SC_UCSD_1856	20140930B	Ex1	Ex1BA10	Smart+Poly	Small	Frozen DMSO	1568-BA10-sec1	SRR3230894	Ex	BA10
20141001A_1C20_S20	SC_UCSD_2258	20141001A	Ex1	Ex1BA10	Smart+Poly	Small	Frozen DMSO	1568-BA10-sec1	SRR5899432	Ex	BA10
20141001A_1C29_S34	SC_UCSD_2772	20141001A	Ex1	Ex1BA10	Smart+Poly	Small	Frozen DMSO	1568-BA10-sec1	SRR5899946	Ex	BA10
20141001A_1C35_S46	SC_UCSD_3734	20141001A	Ex1	Ex1BA10	Smart+Poly	Small	Frozen DMSO	1568-BA10-sec1	SRR5900908	Ex	BA10
20141001A_1C43_S91	SC_UCSD_2443	20141001A	Ex1	Ex1BA10	Smart+Poly	Small	Frozen DMSO	1568-BA10-sec1	SRR5899617	Ex	BA10
20141001A_1C54_S48	SC_UCSD_3486	20141001A	Ex1	Ex1BA10	Smart+Poly	Small	Frozen DMSO	1568-BA10-sec1	SRR5900660	Ex	BA10
20141001A_1C62_S45	SC_UCSD_3357	20141001A	Ex1	Ex1BA10	Smart+Poly	Small	Frozen DMSO	1568-BA10-sec1	SRR5900531	Ex	BA10
20141001A_1C84_S47	SC_UCSD_2998	20141001A	Ex1	Ex1BA10	Smart+Poly	Small	Frozen DMSO	1568-BA10-sec1	SRR5900172	Ex	BA10
20141001A_1C96_S59	SC_UCSD_2100	20141001A	Ex1	Ex1BA10	Smart+Poly	Small	Frozen DMSO	1568-BA10-sec1	SRR5899274	Ex	BA10
20141001B_1C13_S50	SC_UCSD_2737	20141001B	Ex1	Ex1BA10	Smart+Poly	Small	Frozen DMSO	1568-BA10-sec1	SRR5899911	Ex	BA10
20141001B_1C19_S62	SC_UCSD_2108	20141001B	Ex1	Ex1BA10	Smart+Poly	Small	Frozen DMSO	1568-BA10-sec1	SRR5899282	Ex	BA10
20141001B_1C20_S85	SC_UCSD_2452	20141001B	Ex1	Ex1BA10	Smart+Poly	Small	Frozen DMSO	1568-BA10-sec1	SRR5899626	Ex	BA10
20141001B_1C23_S64	SC_UCSD_2914	20141001B	Ex1	Ex1BA10	Smart+Poly	Small	Frozen DMSO	1568-BA10-sec1	SRR5900088	Ex	BA10
20141001B_1C32_S2	SC_UCSD_3490	20141001B	Ex1	Ex1BA10	Smart+Poly	Small	Frozen DMSO	1568-BA10-sec1	SRR5900664	Ex	BA10
20141001B_1C65_S41	SC_UCSD_3644	20141001B	Ex1	Ex1BA10	Smart+Poly	Small	Frozen DMSO	1568-BA10-sec1	SRR5900818	Ex	BA10
20141001B_1C77_S65	SC_UCSD_2313	20141001B	Ex1	Ex1BA10	Smart+Poly	Small	Frozen DMSO	1568-BA10-sec1	SRR5899487	Ex	BA10
20141001B_1C84_S29	SC_UCSD_3724	20141001B	Ex1	Ex1BA10	Smart+Poly	Small	Frozen DMSO	1568-BA10-sec1	SRR5900898	Ex	BA10
20141001B_1C91_S16	SC_UCSD_2764	20141001B	Ex1	Ex1BA10	Smart+Poly	Small	Frozen DMSO	1568-BA10-sec1	SRR5899938	Ex	BA10
20141002A_1C03_S78	SC_UCSD_2131	20141002A	Ex1	Ex1BA10	Smart+Poly	Small	Frozen DMSO	1568-BA10-sec1	SRR5899305	Ex	BA10
20141002A_1C14_S43	SC_UCSD_1952	20141002A	Ex1	Ex1BA10	Smart+Poly	Small	Frozen DMSO	1568-BA10-sec1	SRR5899126	Ex	BA10
20141002A_1C29_S23	SC_UCSD_2396	20141002A	Ex1	Ex1BA10	Smart+Poly	Small	Frozen DMSO	1568-BA10-sec1	SRR5899570	Ex	BA10
20141002A_1C39_S44	SC_UCSD_2249	20141002A	Ex1	Ex1BA10	Smart+Poly	Small	Frozen DMSO	1568-BA10-sec1	SRR5899423	Ex	BA10
20141002A_1C40_S94	SC_UCSD_2858	20141002A	Ex1	Ex1BA10	Smart+Poly	Small	Frozen DMSO	1568-BA10-sec1	SRR5900032	Ex	BA10
20141002A_1C61_S68	SC_UCSD_2732	20141002A	Ex1	Ex1BA10	Smart+Poly	Small	Frozen DMSO	1568-BA10-sec1	SRR5899906	Ex	BA10
20141002A_1C65_S72	SC_UCSD_3174	20141002A	Ex1	Ex1BA10	Smart+Poly	Small	Frozen DMSO	1568-BA10-sec1	SRR5900348	Ex	BA10
20141002A_1C88_S19	SC_UCSD_2660	20141002A	Ex1	Ex1BA10	Smart+Poly	Small	Frozen DMSO	1568-BA10-sec1	SRR5899834	Ex	BA10
20141002A_1C93_S9	SC_UCSD_3324	20141002A	Ex1	Ex1BA10	Smart+Poly	Small	Frozen DMSO	1568-BA10-sec1	SRR5900498	Ex	BA10
20141002A_1C94_S28	SC_UCSD_2229	20141002A	Ex1	Ex1BA10	Smart+Poly	Small	Frozen DMSO	1568-BA10-sec1	SRR5899403	Ex	BA10
20141002A_1C96_S48	SC_UCSD_3697	20141002A	Ex1	Ex1BA10	Smart+Poly	Small	Frozen DMSO	1568-BA10-sec1	SRR5900871	Ex	BA10
20141002B_1C50_S2	SC_UCSD_2416	20141002B	Ex1	Ex1BA10	Smart+Poly	Small	Frozen DMSO	1568-BA10-sec1	SRR5899590	Ex	BA10
20141002B_1C62_S11	SC_UCSD_3531	20141002B	Ex1	Ex1BA10	Smart+Poly	Small	Frozen DMSO	1568-BA10-sec1	SRR5900705	Ex	BA10
20141002B_1C68_S20	SC_UCSD_2974	20141002B	Ex1	Ex1BA10	Smart+Poly	Small	Frozen DMSO	1568-BA10-sec1	SRR5900148	Ex	BA10
20141002B_1C73_S55	SC_UCSD_3719	20141002B	Ex1	Ex1BA10	Smart+Poly	Small	Frozen DMSO	1568-BA10-sec1	SRR5900893	Ex	BA10
20141002B_1C75_S62	SC_UCSD_3026	20141002B	Ex1	Ex1BA10	Smart+Poly	Small	Frozen DMSO	1568-BA10-sec1	SRR5900200	Ex	BA10
20141002B_1C82_S14	SC_UCSD_3399	20141002B	Ex1	Ex1BA10	Smart+Poly	Small	Frozen DMSO	1568-BA10-sec1	SRR5900573	Ex	BA10
20141002B_1C83_S31	SC_UCSD_3150	20141002B	Ex1	Ex1BA10	Smart+Poly	Small	Frozen DMSO	1568-BA10-sec1	SRR5900324	Ex	BA10
20141008A_1C33_S51	SC_UCSD_2644	20141008A	Ex1	Ex1BA17	Smart+Poly	Small	Frozen DMSO	1568-BA17-sec29	SRR5899818	Ex	BA17
20141008A_1C40_S60	SC_UCSD_2544	20141008A	Ex1	Ex1BA17	Smart+Poly	Small	Frozen DMSO	1568-BA17-sec29	SRR5899718	Ex	BA17
20141008A_1C41_S17	SC_UCSD_3469	20141008A	Ex1	Ex1BA17	Smart+Poly	Small	Frozen DMSO	1568-BA17-sec29	SRR5900643	Ex	BA17
20141008A_1C46_S68	SC_UCSD_3605	20141008A	Ex1	Ex1BA17	Smart+Poly	Small	Frozen DMSO	1568-BA17-sec29	SRR5900779	Ex	BA17
20141008A_1C64_S53	SC_UCSD_1973	20141008A	Ex1	Ex1BA17	Smart+Poly	Small	Frozen DMSO	1568-BA17-sec29	SRR5899147	Ex	BA17
20141008A_1C67_S59	SC_UCSD_3082	20141008A	Ex1	Ex1BA17	Smart+Poly	Small	Frozen DMSO	1568-BA17-sec29	SRR5900256	Ex	BA17
20141008A_1C74_S16	SC_UCSD_3790	20141008A	Ex1	Ex1BA17	Smart+Poly	Small	Frozen DMSO	1568-BA17-sec29	SRR5900964	Ex	BA17
20141008B_1C37_S37	SC_UCSD_2056	20141008B	Ex1	Ex1BA17	Smart+Poly	Small	Frozen DMSO	1568-BA17-sec29	SRR5899230	Ex	BA17
20141008B_1C49_S26	SC_UCSD_2442	20141008B	Ex1	Ex1BA17	Smart+Poly	Small	Frozen DMSO	1568-BA17-sec29	SRR5899616	Ex	BA17
20141008B_1C57_S3	SC_UCSD_2485	20141008B	Ex1	Ex1BA17	Smart+Poly	Small	Frozen DMSO	1568-BA17-sec29	SRR5899659	Ex	BA17
20141008B_1C61_S38	SC_UCSD_3319	20141008B	Ex1	Ex1BA17	Smart+Poly	Small	Frozen DMSO	1568-BA17-sec29	SRR5900493	Ex	BA17
20141008B_1C71_S41	SC_UCSD_1978	20141008B	Ex1	Ex1BA17	Smart+Poly	Small	Frozen DMSO	1568-BA17-sec29	SRR5899152	Ex	BA17
20141008B_1C73_S27	SC_UCSD_3027	20141008B	Ex1	Ex1BA17	Smart+Poly	Small	Frozen DMSO	1568-BA17-sec29	SRR5900201	Ex	BA17
20141008B_1C82_S6	SC_UCSD_3114	20141008B	Ex1	Ex1BA17	Smart+Poly	Small	Frozen DMSO	1568-BA17-sec29	SRR5900288	Ex	BA17
20141008B_1C91_S39	SC_UCSD_3574	20141008B	Ex1	Ex1BA17	Smart+Poly	Small	Frozen DMSO	1568-BA17-sec29	SRR5900748	Ex	BA17
20141014A_1C03_S30	SC_UCSD_3360	20141014A	Ex1	Ex1BA22	Smart+Poly	Small	Frozen DMSO	1568-BA22-sec15	SRR5900534	Ex	BA22
20141014A_1C04_S46	SC_UCSD_2409	20141014A	Ex1	Ex1BA22	Smart+Poly	Small	Frozen DMSO	1568-BA22-sec15	SRR5899583	Ex	BA22
20141014A_1C06_S33	SC_UCSD_2159	20141014A	Ex1	Ex1BA22	Smart+Poly	Small	Frozen DMSO	1568-BA22-sec15	SRR5899333	Ex	BA22
20141014A_1C09_S42	SC_UCSD_2654	20141014A	Ex1	Ex1BA22	Smart+Poly	Small	Frozen DMSO	1568-BA22-sec15	SRR5899828	Ex	BA22
20141014A_1C10_S58	SC_UCSD_1990	20141014A	Ex1	Ex1BA22	Smart+Poly	Small	Frozen DMSO	1568-BA22-sec15	SRR5899164	Ex	BA22
20141014A_1C11_S10	SC_UCSD_2412	20141014A	Ex1	Ex1BA22	Smart+Poly	Small	Frozen DMSO	1568-BA22-sec15	SRR5899586	Ex	BA22
20141014A_1C40_S81	SC_UCSD_2475	20141014A	Ex1	Ex1BA22	Smart+Poly	Small	Frozen DMSO	1568-BA22-sec15	SRR5899649	Ex	BA22
20141014A_1C53_S71	SC_UCSD_2210	20141014A	Ex1	Ex1BA22	Smart+Poly	Small	Frozen DMSO	1568-BA22-sec15	SRR5899384	Ex	BA22
20141014A_1C61_S79	SC_UCSD_1956	20141014A	Ex1	Ex1BA22	Smart+Poly	Small	Frozen DMSO	1568-BA22-sec15	SRR5899130	Ex	BA22
20141014A_1C63_S80	SC_UCSD_2921	20141014A	Ex1	Ex1BA22	Smart+Poly	Small	Frozen DMSO	1568-BA22-sec15	SRR5900095	Ex	BA22
20141014A_1C64_S23	SC_UCSD_3840	20141014A	Ex1	Ex1BA22	Smart+Poly	Small	Frozen DMSO	1568-BA22-sec15	SRR5901014	Ex	BA22
20141014A_1C68_S20	SC_UCSD_2925	20141014A	Ex1	Ex1BA22	Smart+Poly	Small	Frozen DMSO	1568-BA22-sec15	SRR5900099	Ex	BA22
20141014A_1C83_S12	SC_UCSD_3201	20141014A	Ex1	Ex1BA22	Smart+Poly	Small	Frozen DMSO	1568-BA22-sec15	SRR5900375	Ex	BA22
20141014B_1C02_S1	SC_UCSD_3110	20141014B	Ex1	Ex1BA22	Smart+Poly	Small	Frozen DMSO	1568-BA22-sec15	SRR5900284	Ex	BA22
20141014B_1C06_S39	SC_UCSD_2273	20141014B	Ex1	Ex1BA22	Smart+Poly	Small	Frozen DMSO	1568-BA22-sec15	SRR5899447	Ex	BA22
20141014B_1C08_S13	SC_UCSD_3829	20141014B	Ex1	Ex1BA22	Smart+Poly	Small	Frozen DMSO	1568-BA22-sec15	SRR5901003	Ex	BA22
20141014B_1C18_S63	SC_UCSD_2155	20141014B	Ex1	Ex1BA22	Smart+Poly	Small	Frozen DMSO	1568-BA22-sec15	SRR5899329	Ex	BA22
20141014B_1C31_S96	SC_UCSD_3087	20141014B	Ex1	Ex1BA22	Smart+Poly	Small	Frozen DMSO	1568-BA22-sec15	SRR5900261	Ex	BA22
20141014B_1C33_S73	SC_UCSD_3858	20141014B	Ex1	Ex1BA22	Smart+Poly	Small	Frozen DMSO	1568-BA22-sec15	SRR5901032	Ex	BA22
20141014B_1C40_S87	SC_UCSD_3401	20141014B	Ex1	Ex1BA22	Smart+Poly	Small	Frozen DMSO	1568-BA22-sec15	SRR5900575	Ex	BA22
20141014B_1C42_S5	SC_UCSD_3639	20141014B	Ex1	Ex1BA22	Smart+Poly	Small	Frozen DMSO	1568-BA22-sec15	SRR5900813	Ex	BA22
20141014B_1C60_S6	SC_UCSD_3831	20141014B	Ex1	Ex1BA22	Smart+Poly	Small	Frozen DMSO	1568-BA22-sec15	SRR5901005	Ex	BA22
20141014B_1C66_S18	SC_UCSD_2020	20141014B	Ex1	Ex1BA22	Smart+Poly	Small	Frozen DMSO	1568-BA22-sec15	SRR5899194	Ex	BA22
20141014B_1C85_S27	SC_UCSD_2848	20141014B	Ex1	Ex1BA22	Smart+Poly	Small	Frozen DMSO	1568-BA22-sec15	SRR5900022	Ex	BA22
20141014B_1C86_S86	SC_UCSD_3106	20141014B	Ex1	Ex1BA22	Smart+Poly	Small	Frozen DMSO	1568-BA22-sec15	SRR5900280	Ex	BA22
20141014B_1C88_S30	SC_UCSD_2302	20141014B	Ex1	Ex1BA22	Smart+Poly	Small	Frozen DMSO	1568-BA22-sec15	SRR5899476	Ex	BA22
20141014B_1C89_S77	SC_UCSD_2005	20141014B	Ex1	Ex1BA22	Smart+Poly	Small	Frozen DMSO	1568-BA22-sec15	SRR5899179	Ex	BA22
20141014B_1C93_S38	SC_UCSD_3153	20141014B	Ex1	Ex1BA22	Smart+Poly	Small	Frozen DMSO	1568-BA22-sec15	SRR5900327	Ex	BA22
20141015A_1C16_S42	SC_UCSD_3873	20141015A	Ex1	Ex1BA10	Smart+Poly	Small	None	1568-BA10-sec1	SRR5901047	Ex	BA10
20141015A_1C18_S17	SC_UCSD_3516	20141015A	Ex1	Ex1BA10	Smart+Poly	Small	None	1568-BA10-sec1	SRR5900690	Ex	BA10
20141015A_1C30_S54	SC_UCSD_2428	20141015A	Ex1	Ex1BA10	Smart+Poly	Small	None	1568-BA10-sec1	SRR5899602	Ex	BA10
20141015A_1C31_S49	SC_UCSD_3165	20141015A	Ex1	Ex1BA10	Smart+Poly	Small	None	1568-BA10-sec1	SRR5900339	Ex	BA10
20141015A_1C35_S89	SC_UCSD_2708	20141015A	Ex1	Ex1BA10	Smart+Poly	Small	None	1568-BA10-sec1	SRR5899882	Ex	BA10
20141015A_1C39_S74	SC_UCSD_3765	20141015A	Ex1	Ex1BA10	Smart+Poly	Small	None	1568-BA10-sec1	SRR5900939	Ex	BA10
20141015A_1C42_S78	SC_UCSD_2647	20141015A	Ex1	Ex1BA10	Smart+Poly	Small	None	1568-BA10-sec1	SRR5899821	Ex	BA10
20141015A_1C48_S90	SC_UCSD_2281	20141015A	Ex1	Ex1BA10	Smart+Poly	Small	None	1568-BA10-sec1	SRR5899455	Ex	BA10
20141015A_1C55_S15	SC_UCSD_2535	20141015A	Ex1	Ex1BA10	Smart+Poly	Small	None	1568-BA10-sec1	SRR5899709	Ex	BA10
20141015A_1C66_S56	SC_UCSD_3162	20141015A	Ex1	Ex1BA10	Smart+Poly	Small	None	1568-BA10-sec1	SRR5900336	Ex	BA10
20141015A_1C72_S68	SC_UCSD_2586	20141015A	Ex1	Ex1BA10	Smart+Poly	Small	None	1568-BA10-sec1	SRR5899760	Ex	BA10
20141015A_1C83_S32	SC_UCSD_2638	20141015A	Ex1	Ex1BA10	Smart+Poly	Small	None	1568-BA10-sec1	SRR5899812	Ex	BA10
20141015A_1C86_S4	SC_UCSD_2606	20141015A	Ex1	Ex1BA10	Smart+Poly	Small	None	1568-BA10-sec1	SRR5899780	Ex	BA10
20141015B_1C02_S10	SC_UCSD_2721	20141015B	Ex1	Ex1BA10	Smart+Poly	Small	None (0.1% Paraformaldehyde treated)	1568-BA10-sec1	SRR5899895	Ex	BA10
20141015B_1C13_S94	SC_UCSD_3353	20141015B	Ex1	Ex1BA10	Smart+Poly	Small	None (0.1% Paraformaldehyde treated)	1568-BA10-sec1	SRR5900527	Ex	BA10
20141015B_1C35_S1	SC_UCSD_2905	20141015B	Ex1	Ex1BA10	Smart+Poly	Small	None (0.1% Paraformaldehyde treated)	1568-BA10-sec1	SRR5900079	Ex	BA10
20141015B_1C38_S70	SC_UCSD_2196	20141015B	Ex1	Ex1BA10	Smart+Poly	Small	None (0.1% Paraformaldehyde treated)	1568-BA10-sec1	SRR5899370	Ex	BA10
20141015B_1C61_S59	SC_UCSD_3606	20141015B	Ex1	Ex1BA10	Smart+Poly	Small	None (0.1% Paraformaldehyde treated)	1568-BA10-sec1	SRR5900780	Ex	BA10
20141015B_1C74_S24	SC_UCSD_3916	20141015B	Ex1	Ex1BA10	Smart+Poly	Small	None (0.1% Paraformaldehyde treated)	1568-BA10-sec1	SRR5901090	Ex	BA10
20141015B_1C90_S2	SC_UCSD_3820	20141015B	Ex1	Ex1BA10	Smart+Poly	Small	None (0.1% Paraformaldehyde treated)	1568-BA10-sec1	SRR5900994	Ex	BA10
20141016A_1C12_S57	SC_UCSD_2368	20141016A	Ex1	Ex1BA22	Smart+Poly	Small	Frozen DMSO	1568-BA22-sec15	SRR5899542	Ex	BA22
20141016A_1C17_S34	SC_UCSD_2385	20141016A	Ex1	Ex1BA22	Smart+Poly	Small	Frozen DMSO	1568-BA22-sec15	SRR5899559	Ex	BA22
20141016A_1C24_S81	SC_UCSD_3506	20141016A	Ex1	Ex1BA22	Smart+Poly	Small	Frozen DMSO	1568-BA22-sec15	SRR5900680	Ex	BA22
20141016A_1C35_S46	SC_UCSD_3372	20141016A	Ex1	Ex1BA22	Smart+Poly	Small	Frozen DMSO	1568-BA22-sec15	SRR5900546	Ex	BA22
20141016A_1C53_S83	SC_UCSD_2346	20141016A	Ex1	Ex1BA22	Smart+Poly	Small	Frozen DMSO	1568-BA22-sec15	SRR5899520	Ex	BA22
20141016A_1C67_S8	SC_UCSD_2473	20141016A	Ex1	Ex1BA22	Smart+Poly	Small	Frozen DMSO	1568-BA22-sec15	SRR5899647	Ex	BA22
20141016A_1C77_S12	SC_UCSD_2570	20141016A	Ex1	Ex1BA22	Smart+Poly	Small	Frozen DMSO	1568-BA22-sec15	SRR5899744	Ex	BA22
20141016A_1C79_S21	SC_UCSD_1904	20141016A	Ex1	Ex1BA22	Smart+Poly	Small	Frozen DMSO	1568-BA22-sec15	SRR5899078	Ex	BA22
20141016A_1C80_S80	SC_UCSD_2265	20141016A	Ex1	Ex1BA22	Smart+Poly	Small	Frozen DMSO	1568-BA22-sec15	SRR5899439	Ex	BA22
20141016A_1C81_S32	SC_UCSD_1903	20141016A	Ex1	Ex1BA22	Smart+Poly	Small	Frozen DMSO	1568-BA22-sec15	SRR5899077	Ex	BA22
20141016A_1C88_S84	SC_UCSD_3413	20141016A	Ex1	Ex1BA22	Smart+Poly	Small	Frozen DMSO	1568-BA22-sec15	SRR5900587	Ex	BA22
20141016A_1C94_S96	SC_UCSD_3703	20141016A	Ex1	Ex1BA22	Smart+Poly	Small	Frozen DMSO	1568-BA22-sec15	SRR5900877	Ex	BA22
20141016B_1C03_S1	SC_UCSD_3537	20141016B	Ex1	Ex1BA22	Smart+Poly	Small	Frozen DMSO	1568-BA22-sec15	SRR5900711	Ex	BA22
20141016B_1C16_S76	SC_UCSD_1889	20141016B	Ex1	Ex1BA22	Smart+Poly	Small	Frozen DMSO	1568-BA22-sec15	SRR5899063	Ex	BA22
20141016B_1C22_S88	SC_UCSD_2080	20141016B	Ex1	Ex1BA22	Smart+Poly	Small	Frozen DMSO	1568-BA22-sec15	SRR5899254	Ex	BA22
20141016B_1C27_S26	SC_UCSD_2515	20141016B	Ex1	Ex1BA22	Smart+Poly	Small	Frozen DMSO	1568-BA22-sec15	SRR5899689	Ex	BA22
20141016B_1C34_S75	SC_UCSD_3030	20141016B	Ex1	Ex1BA22	Smart+Poly	Small	Frozen DMSO	1568-BA22-sec15	SRR5900204	Ex	BA22
20141016B_1C40_S87	SC_UCSD_2803	20141016B	Ex1	Ex1BA22	Smart+Poly	Small	Frozen DMSO	1568-BA22-sec15	SRR5899977	Ex	BA22
20141016B_1C44_S73	SC_UCSD_3115	20141016B	Ex1	Ex1BA22	Smart+Poly	Small	Frozen DMSO	1568-BA22-sec15	SRR5900289	Ex	BA22
20141016B_1C52_S41	SC_UCSD_3461	20141016B	Ex1	Ex1BA22	Smart+Poly	Small	Frozen DMSO	1568-BA22-sec15	SRR5900635	Ex	BA22
20141016B_1C55_S38	SC_UCSD_1941	20141016B	Ex1	Ex1BA22	Smart+Poly	Small	Frozen DMSO	1568-BA22-sec15	SRR5899115	Ex	BA22
20141016B_1C65_S89	SC_UCSD_2545	20141016B	Ex1	Ex1BA22	Smart+Poly	Small	Frozen DMSO	1568-BA22-sec15	SRR5899719	Ex	BA22
20141016B_1C79_S39	SC_UCSD_3599	20141016B	Ex1	Ex1BA22	Smart+Poly	Small	Frozen DMSO	1568-BA22-sec15	SRR5900773	Ex	BA22
20141016B_1C86_S3	SC_UCSD_3220	20141016B	Ex1	Ex1BA22	Smart+Poly	Small	Frozen DMSO	1568-BA22-sec15	SRR5900394	Ex	BA22
20141016B_1C89_S30	SC_UCSD_2832	20141016B	Ex1	Ex1BA22	Smart+Poly	Small	Frozen DMSO	1568-BA22-sec15	SRR5900006	Ex	BA22
20141016B_1C91_S51	SC_UCSD_3280	20141016B	Ex1	Ex1BA22	Smart+Poly	Small	Frozen DMSO	1568-BA22-sec15	SRR5900454	Ex	BA22
20141021A_1C04_S94	SC_UCSD_1969	20141021A	Ex1	Ex1BA22	Smart+Poly	Small	Frozen DMSO	1568-BA22-sec15	SRR5899143	Ex	BA22
20141021A_1C06_S34	SC_UCSD_3558	20141021A	Ex1	Ex1BA22	Smart+Poly	Small	Frozen DMSO	1568-BA22-sec15	SRR5900732	Ex	BA22
20141021A_1C09_S78	SC_UCSD_3604	20141021A	Ex1	Ex1BA22	Smart+Poly	Small	Frozen DMSO	1568-BA22-sec15	SRR5900778	Ex	BA22
20141021A_1C10_S11	SC_UCSD_2763	20141021A	Ex1	Ex1BA22	Smart+Poly	Small	Frozen DMSO	1568-BA22-sec15	SRR5899937	Ex	BA22
20141021A_1C16_S23	SC_UCSD_3837	20141021A	Ex1	Ex1BA22	Smart+Poly	Small	Frozen DMSO	1568-BA22-sec15	SRR5901011	Ex	BA22
20141021A_1C21_S7	SC_UCSD_3823	20141021A	Ex1	Ex1BA22	Smart+Poly	Small	Frozen DMSO	1568-BA22-sec15	SRR5900997	Ex	BA22
20141021A_1C23_S70	SC_UCSD_2932	20141021A	Ex1	Ex1BA22	Smart+Poly	Small	Frozen DMSO	1568-BA22-sec15	SRR5900106	Ex	BA22
20141021A_1C28_S46	SC_UCSD_2225	20141021A	Ex1	Ex1BA22	Smart+Poly	Small	Frozen DMSO	1568-BA22-sec15	SRR5899399	Ex	BA22
20141021A_1C37_S19	SC_UCSD_2246	20141021A	Ex1	Ex1BA22	Smart+Poly	Small	Frozen DMSO	1568-BA22-sec15	SRR5899420	Ex	BA22
20141021A_1C39_S32	SC_UCSD_3358	20141021A	Ex1	Ex1BA22	Smart+Poly	Small	Frozen DMSO	1568-BA22-sec15	SRR5900532	Ex	BA22
20141021A_1C41_S82	SC_UCSD_2230	20141021A	Ex1	Ex1BA22	Smart+Poly	Small	Frozen DMSO	1568-BA22-sec15	SRR5899404	Ex	BA22
20141021A_1C48_S71	SC_UCSD_3709	20141021A	Ex1	Ex1BA22	Smart+Poly	Small	Frozen DMSO	1568-BA22-sec15	SRR5900883	Ex	BA22
20141021A_1C49_S56	SC_UCSD_2857	20141021A	Ex1	Ex1BA22	Smart+Poly	Small	Frozen DMSO	1568-BA22-sec15	SRR5900031	Ex	BA22
20141021A_1C60_S72	SC_UCSD_3083	20141021A	Ex1	Ex1BA22	Smart+Poly	Small	Frozen DMSO	1568-BA22-sec15	SRR5900257	Ex	BA22
20141021A_1C67_S68	SC_UCSD_3041	20141021A	Ex1	Ex1BA22	Smart+Poly	Small	Frozen DMSO	1568-BA22-sec15	SRR5900215	Ex	BA22
20141021A_1C68_S21	SC_UCSD_2484	20141021A	Ex1	Ex1BA22	Smart+Poly	Small	Frozen DMSO	1568-BA22-sec15	SRR5899658	Ex	BA22
20141021A_1C71_S12	SC_UCSD_3861	20141021A	Ex1	Ex1BA22	Smart+Poly	Small	Frozen DMSO	1568-BA22-sec15	SRR5901035	Ex	BA22
20141021A_1C76_S84	SC_UCSD_1974	20141021A	Ex1	Ex1BA22	Smart+Poly	Small	Frozen DMSO	1568-BA22-sec15	SRR5899148	Ex	BA22
20141021A_1C77_S24	SC_UCSD_3892	20141021A	Ex1	Ex1BA22	Smart+Poly	Small	Frozen DMSO	1568-BA22-sec15	SRR5901066	Ex	BA22
20141021A_1C85_S10	SC_UCSD_2388	20141021A	Ex1	Ex1BA22	Smart+Poly	Small	Frozen DMSO	1568-BA22-sec15	SRR5899562	Ex	BA22
20141021A_1C86_S45	SC_UCSD_3040	20141021A	Ex1	Ex1BA22	Smart+Poly	Small	Frozen DMSO	1568-BA22-sec15	SRR5900214	Ex	BA22
20141021A_1C91_S22	SC_UCSD_3200	20141021A	Ex1	Ex1BA22	Smart+Poly	Small	Frozen DMSO	1568-BA22-sec15	SRR5900374	Ex	BA22
20141021B_1C02_S47	SC_UCSD_2941	20141021B	Ex1	Ex1BA22	Smart+Poly	Small	Frozen DMSO	1568-BA22-sec15	SRR5900115	Ex	BA22
20141021B_1C07_S23	SC_UCSD_3872	20141021B	Ex1	Ex1BA22	Smart+Poly	Small	Frozen DMSO	1568-BA22-sec15	SRR5901046	Ex	BA22
20141021B_1C09_S22	SC_UCSD_2260	20141021B	Ex1	Ex1BA22	Smart+Poly	Small	Frozen DMSO	1568-BA22-sec15	SRR5899434	Ex	BA22
20141021B_1C13_S30	SC_UCSD_3333	20141021B	Ex1	Ex1BA22	Smart+Poly	Small	Frozen DMSO	1568-BA22-sec15	SRR5900507	Ex	BA22
20141021B_1C19_S36	SC_UCSD_3564	20141021B	Ex1	Ex1BA22	Smart+Poly	Small	Frozen DMSO	1568-BA22-sec15	SRR5900738	Ex	BA22
20141021B_1C24_S12	SC_UCSD_2228	20141021B	Ex1	Ex1BA22	Smart+Poly	Small	Frozen DMSO	1568-BA22-sec15	SRR5899402	Ex	BA22
20141021B_1C29_S39	SC_UCSD_3398	20141021B	Ex1	Ex1BA22	Smart+Poly	Small	Frozen DMSO	1568-BA22-sec15	SRR5900572	Ex	BA22
20141021B_1C32_S9	SC_UCSD_2623	20141021B	Ex1	Ex1BA22	Smart+Poly	Small	Frozen DMSO	1568-BA22-sec15	SRR5899797	Ex	BA22
20141021B_1C35_S45	SC_UCSD_3112	20141021B	Ex1	Ex1BA22	Smart+Poly	Small	Frozen DMSO	1568-BA22-sec15	SRR5900286	Ex	BA22
20141021B_1C42_S34	SC_UCSD_2383	20141021B	Ex1	Ex1BA22	Smart+Poly	Small	Frozen DMSO	1568-BA22-sec15	SRR5899557	Ex	BA22
20141021B_1C45_S3	SC_UCSD_2603	20141021B	Ex1	Ex1BA22	Smart+Poly	Small	Frozen DMSO	1568-BA22-sec15	SRR5899777	Ex	BA22
20141021B_1C47_S6	SC_UCSD_3742	20141021B	Ex1	Ex1BA22	Smart+Poly	Small	Frozen DMSO	1568-BA22-sec15	SRR5900916	Ex	BA22
20141021B_1C51_S18	SC_UCSD_3476	20141021B	Ex1	Ex1BA22	Smart+Poly	Small	Frozen DMSO	1568-BA22-sec15	SRR5900650	Ex	BA22
20141021B_1C54_S7	SC_UCSD_2973	20141021B	Ex1	Ex1BA22	Smart+Poly	Small	Frozen DMSO	1568-BA22-sec15	SRR5900147	Ex	BA22
20141021B_1C56_S43	SC_UCSD_2404	20141021B	Ex1	Ex1BA22	Smart+Poly	Small	Frozen DMSO	1568-BA22-sec15	SRR5899578	Ex	BA22
20141021B_1C66_S14	SC_UCSD_3070	20141021B	Ex1	Ex1BA22	Smart+Poly	Small	Frozen DMSO	1568-BA22-sec15	SRR5900244	Ex	BA22
20141021B_1C78_S46	SC_UCSD_3303	20141021B	Ex1	Ex1BA22	Smart+Poly	Small	Frozen DMSO	1568-BA22-sec15	SRR5900477	Ex	BA22
20141021B_1C85_S38	SC_UCSD_3773	20141021B	Ex1	Ex1BA22	Smart+Poly	Small	Frozen DMSO	1568-BA22-sec15	SRR5900947	Ex	BA22
20141021B_1C88_S21	SC_UCSD_3481	20141021B	Ex1	Ex1BA22	Smart+Poly	Small	Frozen DMSO	1568-BA22-sec15	SRR5900655	Ex	BA22
20141021B_1C91_S44	SC_UCSD_2978	20141021B	Ex1	Ex1BA22	Smart+Poly	Small	Frozen DMSO	1568-BA22-sec15	SRR5900152	Ex	BA22
20141021B_1C93_S31	SC_UCSD_2277	20141021B	Ex1	Ex1BA22	Smart+Poly	Small	Frozen DMSO	1568-BA22-sec15	SRR5899451	Ex	BA22
20141021B_1C94_S28	SC_UCSD_2833	20141021B	Ex1	Ex1BA22	Smart+Poly	Small	Frozen DMSO	1568-BA22-sec15	SRR5900007	Ex	BA22
20141022A_1C01_S52	SC_UCSD_2610	20141022A	Ex1	Ex1BA41	Smart+Poly	Small	Frozen DMSO	1568-BA41/BA42-sec17	SRR5899784	Ex	BA41
20141022A_1C02_S63	SC_UCSD_2072	20141022A	Ex1	Ex1BA41	Smart+Poly	Small	Frozen DMSO	1568-BA41/BA42-sec17	SRR5899246	Ex	BA41
20141022A_1C04_S68	SC_UCSD_2969	20141022A	Ex1	Ex1BA41	Smart+Poly	Small	Frozen DMSO	1568-BA41/BA42-sec17	SRR5900143	Ex	BA41
20141022A_1C08_S75	SC_UCSD_3373	20141022A	Ex1	Ex1BA41	Smart+Poly	Small	Frozen DMSO	1568-BA41/BA42-sec17	SRR5900547	Ex	BA41
20141022A_1C09_S15	SC_UCSD_3865	20141022A	Ex1	Ex1BA41	Smart+Poly	Small	Frozen DMSO	1568-BA41/BA42-sec17	SRR5901039	Ex	BA41
20141022A_1C13_S76	SC_UCSD_2846	20141022A	Ex1	Ex1BA41	Smart+Poly	Small	Frozen DMSO	1568-BA41/BA42-sec17	SRR5900020	Ex	BA41
20141022A_1C14_S87	SC_UCSD_1953	20141022A	Ex1	Ex1BA41	Smart+Poly	Small	Frozen DMSO	1568-BA41/BA42-sec17	SRR5899127	Ex	BA41
20141022A_1C17_S8	SC_UCSD_2464	20141022A	Ex1	Ex1BA41	Smart+Poly	Small	Frozen DMSO	1568-BA41/BA42-sec17	SRR5899638	Ex	BA41
20141022A_1C18_S31	SC_UCSD_3627	20141022A	Ex1	Ex1BA41	Smart+Poly	Small	Frozen DMSO	1568-BA41/BA42-sec17	SRR5900801	Ex	BA41
20141022A_1C26_S16	SC_UCSD_2749	20141022A	Ex1	Ex1BA41	Smart+Poly	Small	Frozen DMSO	1568-BA41/BA42-sec17	SRR5899923	Ex	BA41
20141022A_1C30_S21	SC_UCSD_3237	20141022A	Ex1	Ex1BA41	Smart+Poly	Small	Frozen DMSO	1568-BA41/BA42-sec17	SRR5900411	Ex	BA41
20141022A_1C33_S5	SC_UCSD_2915	20141022A	Ex1	Ex1BA41	Smart+Poly	Small	Frozen DMSO	1568-BA41/BA42-sec17	SRR5900089	Ex	BA41
20141022A_1C35_S32	SC_UCSD_3378	20141022A	Ex1	Ex1BA41	Smart+Poly	Small	Frozen DMSO	1568-BA41/BA42-sec17	SRR5900552	Ex	BA41
20141022A_1C40_S67	SC_UCSD_2540	20141022A	Ex1	Ex1BA41	Smart+Poly	Small	Frozen DMSO	1568-BA41/BA42-sec17	SRR5899714	Ex	BA41
20141022A_1C42_S33	SC_UCSD_2114	20141022A	Ex1	Ex1BA41	Smart+Poly	Small	Frozen DMSO	1568-BA41/BA42-sec17	SRR5899288	Ex	BA41
20141022A_1C54_S70	SC_UCSD_2105	20141022A	Ex1	Ex1BA41	Smart+Poly	Small	Frozen DMSO	1568-BA41/BA42-sec17	SRR5899279	Ex	BA41
20141022A_1C70_S57	SC_UCSD_3126	20141022A	Ex1	Ex1BA41	Smart+Poly	Small	Frozen DMSO	1568-BA41/BA42-sec17	SRR5900300	Ex	BA41
20141022A_1C71_S22	SC_UCSD_3464	20141022A	Ex1	Ex1BA41	Smart+Poly	Small	Frozen DMSO	1568-BA41/BA42-sec17	SRR5900638	Ex	BA41
20141022A_1C77_S34	SC_UCSD_2476	20141022A	Ex1	Ex1BA41	Smart+Poly	Small	Frozen DMSO	1568-BA41/BA42-sec17	SRR5899650	Ex	BA41
20141022A_1C80_S6	SC_UCSD_2633	20141022A	Ex1	Ex1BA41	Smart+Poly	Small	Frozen DMSO	1568-BA41/BA42-sec17	SRR5899807	Ex	BA41
20141022A_1C82_S94	SC_UCSD_3118	20141022A	Ex1	Ex1BA41	Smart+Poly	Small	Frozen DMSO	1568-BA41/BA42-sec17	SRR5900292	Ex	BA41
20141022A_1C87_S65	SC_UCSD_2199	20141022A	Ex1	Ex1BA41	Smart+Poly	Small	Frozen DMSO	1568-BA41/BA42-sec17	SRR5899373	Ex	BA41
20141022A_1C88_S11	SC_UCSD_3418	20141022A	Ex1	Ex1BA41	Smart+Poly	Small	Frozen DMSO	1568-BA41/BA42-sec17	SRR5900592	Ex	BA41
20141022A_1C89_S58	SC_UCSD_3238	20141022A	Ex1	Ex1BA41	Smart+Poly	Small	Frozen DMSO	1568-BA41/BA42-sec17	SRR5900412	Ex	BA41
20141022A_1C92_S30	SC_UCSD_3366	20141022A	Ex1	Ex1BA41	Smart+Poly	Small	Frozen DMSO	1568-BA41/BA42-sec17	SRR5900540	Ex	BA41
20141022A_1C93_S77	SC_UCSD_2086	20141022A	Ex1	Ex1BA41	Smart+Poly	Small	Frozen DMSO	1568-BA41/BA42-sec17	SRR5899260	Ex	BA41
20141022B_1C71_S5	SC_UCSD_2758	20141022B	Ex1	Ex1BA10	Smart+Poly	Small	Frozen DMSO	1568-BA10-sec1	SRR5899932	Ex	BA10
20141022B_1C96_S64	SC_UCSD_2068	20141022B	Ex1	Ex1BA10	Smart+Poly	Small	Frozen DMSO	1568-BA10-sec1	SRR5899242	Ex	BA10
20141027A_1C10_S42	SC_UCSD_2200	20141027A	Ex1	Ex1BA21	Smart+Poly	Small	Frozen DMSO	1568-BA21-sec15	SRR5899374	Ex	BA21
20141027A_1C11_S53	SC_UCSD_2809	20141027A	Ex1	Ex1BA21	Smart+Poly	Small	Frozen DMSO	1568-BA21-sec15	SRR5899983	Ex	BA21
20141027A_1C17_S65	SC_UCSD_3283	20141027A	Ex1	Ex1BA21	Smart+Poly	Small	Frozen DMSO	1568-BA21-sec15	SRR5900457	Ex	BA21
20141027A_1C19_S62	SC_UCSD_3417	20141027A	Ex1	Ex1BA21	Smart+Poly	Small	Frozen DMSO	1568-BA21-sec15	SRR5900591	Ex	BA21
20141027A_1C43_S37	SC_UCSD_3746	20141027A	Ex1	Ex1BA21	Smart+Poly	Small	Frozen DMSO	1568-BA21-sec15	SRR5900920	Ex	BA21
20141027A_1C44_S14	SC_UCSD_2209	20141027A	Ex1	Ex1BA21	Smart+Poly	Small	Frozen DMSO	1568-BA21-sec15	SRR5899383	Ex	BA21
20141027A_1C49_S3	SC_UCSD_3763	20141027A	Ex1	Ex1BA21	Smart+Poly	Small	Frozen DMSO	1568-BA21-sec15	SRR5900937	Ex	BA21
20141027A_1C51_S16	SC_UCSD_3509	20141027A	Ex1	Ex1BA21	Smart+Poly	Small	Frozen DMSO	1568-BA21-sec15	SRR5900683	Ex	BA21
20141027A_1C52_S66	SC_UCSD_2315	20141027A	Ex1	Ex1BA21	Smart+Poly	Small	Frozen DMSO	1568-BA21-sec15	SRR5899489	Ex	BA21
20141027A_1C53_S90	SC_UCSD_3410	20141027A	Ex1	Ex1BA21	Smart+Poly	Small	Frozen DMSO	1568-BA21-sec15	SRR5900584	Ex	BA21
20141027A_1C56_S63	SC_UCSD_3223	20141027A	Ex1	Ex1BA21	Smart+Poly	Small	Frozen DMSO	1568-BA21-sec15	SRR5900397	Ex	BA21
20141027A_1C58_S78	SC_UCSD_2173	20141027A	Ex1	Ex1BA21	Smart+Poly	Small	Frozen DMSO	1568-BA21-sec15	SRR5899347	Ex	BA21
20141027A_1C61_S27	SC_UCSD_2318	20141027A	Ex1	Ex1BA21	Smart+Poly	Small	Frozen DMSO	1568-BA21-sec15	SRR5899492	Ex	BA21
20141027A_1C65_S7	SC_UCSD_2500	20141027A	Ex1	Ex1BA21	Smart+Poly	Small	Frozen DMSO	1568-BA21-sec15	SRR5899674	Ex	BA21
20141027A_1C69_S40	SC_UCSD_2559	20141027A	Ex1	Ex1BA21	Smart+Poly	Small	Frozen DMSO	1568-BA21-sec15	SRR5899733	Ex	BA21
20141027A_1C79_S64	SC_UCSD_2286	20141027A	Ex1	Ex1BA21	Smart+Poly	Small	Frozen DMSO	1568-BA21-sec15	SRR5899460	Ex	BA21
20141027A_1C91_S76	SC_UCSD_3739	20141027A	Ex1	Ex1BA21	Smart+Poly	Small	Frozen DMSO	1568-BA21-sec15	SRR5900913	Ex	BA21
20141027B_1C01_S80	SC_UCSD_2878	20141027B	Ex1	Ex1BA21	Smart+Poly	Small	Frozen DMSO	1568-BA21-sec15	SRR5900052	Ex	BA21
20141027B_1C13_S9	SC_UCSD_3141	20141027B	Ex1	Ex1BA21	Smart+Poly	Small	Frozen DMSO	1568-BA21-sec15	SRR5900315	Ex	BA21
20141027B_1C14_S68	SC_UCSD_1890	20141027B	Ex1	Ex1BA21	Smart+Poly	Small	Frozen DMSO	1568-BA21-sec15	SRR5899064	Ex	BA21
20141027B_1C16_S25	SC_UCSD_3281	20141027B	Ex1	Ex1BA21	Smart+Poly	Small	Frozen DMSO	1568-BA21-sec15	SRR5900455	Ex	BA21
20141027B_1C18_S47	SC_UCSD_3484	20141027B	Ex1	Ex1BA21	Smart+Poly	Small	Frozen DMSO	1568-BA21-sec15	SRR5900658	Ex	BA21
20141027B_1C22_S37	SC_UCSD_2123	20141027B	Ex1	Ex1BA21	Smart+Poly	Small	Frozen DMSO	1568-BA21-sec15	SRR5899297	Ex	BA21
20141027B_1C24_S59	SC_UCSD_2855	20141027B	Ex1	Ex1BA21	Smart+Poly	Small	Frozen DMSO	1568-BA21-sec15	SRR5900029	Ex	BA21
20141027B_1C27_S21	SC_UCSD_2897	20141027B	Ex1	Ex1BA21	Smart+Poly	Small	Frozen DMSO	1568-BA21-sec15	SRR5900071	Ex	BA21
20141027B_1C28_S71	SC_UCSD_3882	20141027B	Ex1	Ex1BA21	Smart+Poly	Small	Frozen DMSO	1568-BA21-sec15	SRR5901056	Ex	BA21
20141027B_1C30_S49	SC_UCSD_2581	20141027B	Ex1	Ex1BA21	Smart+Poly	Small	Frozen DMSO	1568-BA21-sec15	SRR5899755	Ex	BA21
20141027B_1C31_S20	SC_UCSD_2175	20141027B	Ex1	Ex1BA21	Smart+Poly	Small	Frozen DMSO	1568-BA21-sec15	SRR5899349	Ex	BA21
20141027B_1C34_S83	SC_UCSD_3434	20141027B	Ex1	Ex1BA21	Smart+Poly	Small	Frozen DMSO	1568-BA21-sec15	SRR5900608	Ex	BA21
20141027B_1C35_S84	SC_UCSD_2955	20141027B	Ex1	Ex1BA21	Smart+Poly	Small	Frozen DMSO	1568-BA21-sec15	SRR5900129	Ex	BA21
20141027B_1C37_S32	SC_UCSD_3443	20141027B	Ex1	Ex1BA21	Smart+Poly	Small	Frozen DMSO	1568-BA21-sec15	SRR5900617	Ex	BA21
20141027B_1C47_S96	SC_UCSD_2777	20141027B	Ex1	Ex1BA21	Smart+Poly	Small	Frozen DMSO	1568-BA21-sec15	SRR5899951	Ex	BA21
20141027B_1C51_S70	SC_UCSD_2563	20141027B	Ex1	Ex1BA21	Smart+Poly	Small	Frozen DMSO	1568-BA21-sec15	SRR5899737	Ex	BA21
20141027B_1C53_S50	SC_UCSD_2595	20141027B	Ex1	Ex1BA21	Smart+Poly	Small	Frozen DMSO	1568-BA21-sec15	SRR5899769	Ex	BA21
20141027B_1C63_S94	SC_UCSD_2059	20141027B	Ex1	Ex1BA21	Smart+Poly	Small	Frozen DMSO	1568-BA21-sec15	SRR5899233	Ex	BA21
20141027B_1C65_S62	SC_UCSD_2394	20141027B	Ex1	Ex1BA21	Smart+Poly	Small	Frozen DMSO	1568-BA21-sec15	SRR5899568	Ex	BA21
20141027B_1C71_S74	SC_UCSD_3668	20141027B	Ex1	Ex1BA21	Smart+Poly	Small	Frozen DMSO	1568-BA21-sec15	SRR5900842	Ex	BA21
20141027B_1C75_S93	SC_UCSD_3750	20141027B	Ex1	Ex1BA21	Smart+Poly	Small	Frozen DMSO	1568-BA21-sec15	SRR5900924	Ex	BA21
20141027B_1C92_S58	SC_UCSD_2892	20141027B	Ex1	Ex1BA21	Smart+Poly	Small	Frozen DMSO	1568-BA21-sec15	SRR5900066	Ex	BA21
20141028A_1C11_S31	SC_UCSD_3463	20141028A	Ex1	Ex1BA21	Smart+Poly	Small	Frozen DMSO	1568-BA21-sec15	SRR5900637	Ex	BA21
20141028A_1C22_S91	SC_UCSD_3819	20141028A	Ex1	Ex1BA21	Smart+Poly	Small	Frozen DMSO	1568-BA21-sec15	SRR5900993	Ex	BA21
20141028A_1C24_S90	SC_UCSD_3270	20141028A	Ex1	Ex1BA21	Smart+Poly	Small	Frozen DMSO	1568-BA21-sec15	SRR5900444	Ex	BA21
20141028A_1C26_S28	SC_UCSD_3170	20141028A	Ex1	Ex1BA21	Smart+Poly	Small	Frozen DMSO	1568-BA21-sec15	SRR5900344	Ex	BA21
20141028A_1C36_S20	SC_UCSD_2910	20141028A	Ex1	Ex1BA21	Smart+Poly	Small	Frozen DMSO	1568-BA21-sec15	SRR5900084	Ex	BA21
20141028A_1C43_S4	SC_UCSD_2494	20141028A	Ex1	Ex1BA21	Smart+Poly	Small	Frozen DMSO	1568-BA21-sec15	SRR5899668	Ex	BA21
20141028A_1C56_S65	SC_UCSD_2710	20141028A	Ex1	Ex1BA21	Smart+Poly	Small	Frozen DMSO	1568-BA21-sec15	SRR5899884	Ex	BA21
20141028A_1C59_S92	SC_UCSD_2785	20141028A	Ex1	Ex1BA21	Smart+Poly	Small	Frozen DMSO	1568-BA21-sec15	SRR5899959	Ex	BA21
20141028A_1C61_S29	SC_UCSD_2950	20141028A	Ex1	Ex1BA21	Smart+Poly	Small	Frozen DMSO	1568-BA21-sec15	SRR5900124	Ex	BA21
20141028A_1C63_S18	SC_UCSD_2402	20141028A	Ex1	Ex1BA21	Smart+Poly	Small	Frozen DMSO	1568-BA21-sec15	SRR5899576	Ex	BA21
20141028A_1C76_S33	SC_UCSD_2755	20141028A	Ex1	Ex1BA21	Smart+Poly	Small	Frozen DMSO	1568-BA21-sec15	SRR5899929	Ex	BA21
20141028A_1C78_S44	SC_UCSD_2564	20141028A	Ex1	Ex1BA21	Smart+Poly	Small	Frozen DMSO	1568-BA21-sec15	SRR5899738	Ex	BA21
20141028A_1C80_S89	SC_UCSD_2704	20141028A	Ex1	Ex1BA21	Smart+Poly	Small	Frozen DMSO	1568-BA21-sec15	SRR5899878	Ex	BA21
20141028A_1C83_S9	SC_UCSD_1994	20141028A	Ex1	Ex1BA21	Smart+Poly	Small	Frozen DMSO	1568-BA21-sec15	SRR5899168	Ex	BA21
20141028A_1C84_S56	SC_UCSD_2831	20141028A	Ex1	Ex1BA21	Smart+Poly	Small	Frozen DMSO	1568-BA21-sec15	SRR5900005	Ex	BA21
20141028A_1C88_S45	SC_UCSD_2880	20141028A	Ex1	Ex1BA21	Smart+Poly	Small	Frozen DMSO	1568-BA21-sec15	SRR5900054	Ex	BA21
20141028B_1C05_S94	SC_UCSD_3545	20141028B	Ex1	Ex1BA17	Smart+Poly	Small	Frozen DMSO	1568-BA17-sec29	SRR5900719	Ex	BA17
20141028B_1C07_S79	SC_UCSD_3570	20141028B	Ex1	Ex1BA17	Smart+Poly	Small	Frozen DMSO	1568-BA17-sec29	SRR5900744	Ex	BA17
20141028B_1C08_S7	SC_UCSD_3038	20141028B	Ex1	Ex1BA17	Smart+Poly	Small	Frozen DMSO	1568-BA17-sec29	SRR5900212	Ex	BA17
20141028B_1C15_S30	SC_UCSD_1947	20141028B	Ex1	Ex1BA17	Smart+Poly	Small	Frozen DMSO	1568-BA17-sec29	SRR5899121	Ex	BA17
20141028B_1C19_S91	SC_UCSD_3420	20141028B	Ex1	Ex1BA17	Smart+Poly	Small	Frozen DMSO	1568-BA17-sec29	SRR5900594	Ex	BA17
20141028B_1C28_S58	SC_UCSD_2129	20141028B	Ex1	Ex1BA17	Smart+Poly	Small	Frozen DMSO	1568-BA17-sec29	SRR5899303	Ex	BA17
20141028B_1C30_S83	SC_UCSD_3095	20141028B	Ex1	Ex1BA17	Smart+Poly	Small	Frozen DMSO	1568-BA17-sec29	SRR5900269	Ex	BA17
20141028B_1C36_S95	SC_UCSD_3014	20141028B	Ex1	Ex1BA17	Smart+Poly	Small	Frozen DMSO	1568-BA17-sec29	SRR5900188	Ex	BA17
20141028B_1C39_S20	SC_UCSD_1906	20141028B	Ex1	Ex1BA17	Smart+Poly	Small	Frozen DMSO	1568-BA17-sec29	SRR5899080	Ex	BA17
20141028B_1C41_S23	SC_UCSD_2397	20141028B	Ex1	Ex1BA17	Smart+Poly	Small	Frozen DMSO	1568-BA17-sec29	SRR5899571	Ex	BA17
20141028B_1C52_S12	SC_UCSD_3894	20141028B	Ex1	Ex1BA17	Smart+Poly	Small	Frozen DMSO	1568-BA17-sec29	SRR5901068	Ex	BA17
20141028B_1C57_S45	SC_UCSD_2407	20141028B	Ex1	Ex1BA17	Smart+Poly	Small	Frozen DMSO	1568-BA17-sec29	SRR5899581	Ex	BA17
20141028B_1C59_S96	SC_UCSD_3655	20141028B	Ex1	Ex1BA17	Smart+Poly	Small	Frozen DMSO	1568-BA17-sec29	SRR5900829	Ex	BA17
20141028B_1C78_S48	SC_UCSD_3116	20141028B	Ex1	Ex1BA17	Smart+Poly	Small	Frozen DMSO	1568-BA17-sec29	SRR5900290	Ex	BA17
20141028B_1C85_S10	SC_UCSD_3818	20141028B	Ex1	Ex1BA17	Smart+Poly	Small	Frozen DMSO	1568-BA17-sec29	SRR5900992	Ex	BA17
20141028B_1C89_S37	SC_UCSD_2085	20141028B	Ex1	Ex1BA17	Smart+Poly	Small	Frozen DMSO	1568-BA17-sec29	SRR5899259	Ex	BA17
20141028B_1C96_S72	SC_UCSD_3691	20141028B	Ex1	Ex1BA17	Smart+Poly	Small	Frozen DMSO	1568-BA17-sec29	SRR5900865	Ex	BA17
20141029A_1C03_S38	SC_UCSD_3379	20141029A	Ex1	Ex1BA17	Smart+Poly	Small	Frozen DMSO	1568-BA17-sec29	SRR5900553	Ex	BA17
20141029A_1C14_S51	SC_UCSD_2723	20141029A	Ex1	Ex1BA17	Smart+Poly	Small	Frozen DMSO	1568-BA17-sec29	SRR5899897	Ex	BA17
20141029A_1C21_S74	SC_UCSD_3279	20141029A	Ex1	Ex1BA17	Smart+Poly	Small	Frozen DMSO	1568-BA17-sec29	SRR5900453	Ex	BA17
20141029A_1C26_S75	SC_UCSD_3877	20141029A	Ex1	Ex1BA17	Smart+Poly	Small	Frozen DMSO	1568-BA17-sec29	SRR5901051	Ex	BA17
20141029A_1C31_S3	SC_UCSD_2401	20141029A	Ex1	Ex1BA17	Smart+Poly	Small	Frozen DMSO	1568-BA17-sec29	SRR5899575	Ex	BA17
20141029A_1C36_S54	SC_UCSD_2333	20141029A	Ex1	Ex1BA17	Smart+Poly	Small	Frozen DMSO	1568-BA17-sec29	SRR5899507	Ex	BA17
20141029A_1C55_S40	SC_UCSD_3620	20141029A	Ex1	Ex1BA17	Smart+Poly	Small	Frozen DMSO	1568-BA17-sec29	SRR5900794	Ex	BA17
20141029A_1C57_S17	SC_UCSD_2769	20141029A	Ex1	Ex1BA17	Smart+Poly	Small	Frozen DMSO	1568-BA17-sec29	SRR5899943	Ex	BA17
20141029B_1C07_S69	SC_UCSD_2044	20141029B	Ex1	Ex1BA41	Smart+Poly	Small	Frozen DMSO	1568-BA41/BA42-sec17	SRR5899218	Ex	BA41
20141029B_1C08_S92	SC_UCSD_1926	20141029B	Ex1	Ex1BA41	Smart+Poly	Small	Frozen DMSO	1568-BA41/BA42-sec17	SRR5899100	Ex	BA41
20141029B_1C23_S83	SC_UCSD_2107	20141029B	Ex1	Ex1BA41	Smart+Poly	Small	Frozen DMSO	1568-BA41/BA42-sec17	SRR5899281	Ex	BA41
20141029B_1C29_S95	SC_UCSD_3326	20141029B	Ex1	Ex1BA41	Smart+Poly	Small	Frozen DMSO	1568-BA41/BA42-sec17	SRR5900500	Ex	BA41
20141029B_1C30_S24	SC_UCSD_2724	20141029B	Ex1	Ex1BA41	Smart+Poly	Small	Frozen DMSO	1568-BA41/BA42-sec17	SRR5899898	Ex	BA41
20141029B_1C36_S36	SC_UCSD_2742	20141029B	Ex1	Ex1BA41	Smart+Poly	Small	Frozen DMSO	1568-BA41/BA42-sec17	SRR5899916	Ex	BA41
20141029B_1C38_S45	SC_UCSD_2074	20141029B	Ex1	Ex1BA41	Smart+Poly	Small	Frozen DMSO	1568-BA41/BA42-sec17	SRR5899248	Ex	BA41
20141029B_1C40_S59	SC_UCSD_2521	20141029B	Ex1	Ex1BA41	Smart+Poly	Small	Frozen DMSO	1568-BA41/BA42-sec17	SRR5899695	Ex	BA41
20141029B_1C61_S10	SC_UCSD_2571	20141029B	Ex1	Ex1BA41	Smart+Poly	Small	Frozen DMSO	1568-BA41/BA42-sec17	SRR5899745	Ex	BA41
20141112B_1C15_S66	SC_UCSD_3119	20141112B	Ex1	Ex1BA10	Smart+Poly	Small	Frozen DMSO	1568-BA10-sec1	SRR5900293	Ex	BA10
20141112B_1C43_S88	SC_UCSD_3633	20141112B	Ex1	Ex1BA10	Smart+Poly	Small	Frozen DMSO	1568-BA10-sec1	SRR5900807	Ex	BA10
20141112B_1C46_S69	SC_UCSD_3895	20141112B	Ex1	Ex1BA10	Smart+Poly	Small	Frozen DMSO	1568-BA10-sec1	SRR5901069	Ex	BA10
20141112B_1C48_S70	SC_UCSD_2918	20141112B	Ex1	Ex1BA10	Smart+Poly	Small	Frozen DMSO	1568-BA10-sec1	SRR5900092	Ex	BA10
20141112B_1C59_S71	SC_UCSD_3267	20141112B	Ex1	Ex1BA10	Smart+Poly	Small	Frozen DMSO	1568-BA10-sec1	SRR5900441	Ex	BA10
20141112B_1C63_S79	SC_UCSD_3827	20141112B	Ex1	Ex1BA10	Smart+Poly	Small	Frozen DMSO	1568-BA10-sec1	SRR5901001	Ex	BA10
20141112B_1C64_S11	SC_UCSD_2300	20141112B	Ex1	Ex1BA10	Smart+Poly	Small	Frozen DMSO	1568-BA10-sec1	SRR5899474	Ex	BA10
20141112B_1C66_S36	SC_UCSD_3712	20141112B	Ex1	Ex1BA10	Smart+Poly	Small	Frozen DMSO	1568-BA10-sec1	SRR5900886	Ex	BA10
20141113A_1C05_S17	SC_UCSD_2093	20141113A	Ex1	Ex1BA41	Smart+Poly	Small	Frozen DMSO	1568-BA41/BA42-sec17	SRR5899267	Ex	BA41
20141113A_1C08_S73	SC_UCSD_3562	20141113A	Ex1	Ex1BA41	Smart+Poly	Small	Frozen DMSO	1568-BA41/BA42-sec17	SRR5900736	Ex	BA41
20141113A_1C29_S29	SC_UCSD_3260	20141113A	Ex1	Ex1BA41	Smart+Poly	Small	Frozen DMSO	1568-BA41/BA42-sec17	SRR5900434	Ex	BA41
20141113A_1C33_S74	SC_UCSD_3218	20141113A	Ex1	Ex1BA41	Smart+Poly	Small	Frozen DMSO	1568-BA41/BA42-sec17	SRR5900392	Ex	BA41
20141113A_1C35_S41	SC_UCSD_2930	20141113A	Ex1	Ex1BA41	Smart+Poly	Small	Frozen DMSO	1568-BA41/BA42-sec17	SRR5900104	Ex	BA41
20141113A_1C38_S14	SC_UCSD_3648	20141113A	Ex1	Ex1BA41	Smart+Poly	Small	Frozen DMSO	1568-BA41/BA42-sec17	SRR5900822	Ex	BA41
20141113A_1C44_S26	SC_UCSD_2415	20141113A	Ex1	Ex1BA41	Smart+Poly	Small	Frozen DMSO	1568-BA41/BA42-sec17	SRR5899589	Ex	BA41
20141113A_1C59_S42	SC_UCSD_3885	20141113A	Ex1	Ex1BA41	Smart+Poly	Small	Frozen DMSO	1568-BA41/BA42-sec17	SRR5901059	Ex	BA41
20141113A_1C65_S54	SC_UCSD_2612	20141113A	Ex1	Ex1BA41	Smart+Poly	Small	Frozen DMSO	1568-BA41/BA42-sec17	SRR5899786	Ex	BA41
20141113A_1C68_S87	SC_UCSD_1967	20141113A	Ex1	Ex1BA41	Smart+Poly	Small	Frozen DMSO	1568-BA41/BA42-sec17	SRR5899141	Ex	BA41
20141113A_1C71_S66	SC_UCSD_3392	20141113A	Ex1	Ex1BA41	Smart+Poly	Small	Frozen DMSO	1568-BA41/BA42-sec17	SRR5900566	Ex	BA41
20141113A_1C73_S40	SC_UCSD_3160	20141113A	Ex1	Ex1BA41	Smart+Poly	Small	Frozen DMSO	1568-BA41/BA42-sec17	SRR5900334	Ex	BA41
20141113A_1C75_S27	SC_UCSD_3915	20141113A	Ex1	Ex1BA41	Smart+Poly	Small	Frozen DMSO	1568-BA41/BA42-sec17	SRR5901089	Ex	BA41
20141113A_1C83_S78	SC_UCSD_3685	20141113A	Ex1	Ex1BA41	Smart+Poly	Small	Frozen DMSO	1568-BA41/BA42-sec17	SRR5900859	Ex	BA41
20141113A_1C87_S51	SC_UCSD_1901	20141113A	Ex1	Ex1BA41	Smart+Poly	Small	Frozen DMSO	1568-BA41/BA42-sec17	SRR5899075	Ex	BA41
20141113A_1C90_S6	SC_UCSD_2296	20141113A	Ex1	Ex1BA41	Smart+Poly	Small	Frozen DMSO	1568-BA41/BA42-sec17	SRR5899470	Ex	BA41
20141113A_1C93_S63	SC_UCSD_3801	20141113A	Ex1	Ex1BA41	Smart+Poly	Small	Frozen DMSO	1568-BA41/BA42-sec17	SRR5900975	Ex	BA41
20141113A_1C94_S55	SC_UCSD_2727	20141113A	Ex1	Ex1BA41	Smart+Poly	Small	Frozen DMSO	1568-BA41/BA42-sec17	SRR5899901	Ex	BA41
20141113B_1C01_S80	SC_UCSD_3621	20141113B	Ex1	Ex1BA41	Smart+Poly	Small	Frozen DMSO	1568-BA41/BA42-sec17	SRR5900795	Ex	BA41
20141113B_1C02_S20	SC_UCSD_2675	20141113B	Ex1	Ex1BA41	Smart+Poly	Small	Frozen DMSO	1568-BA41/BA42-sec17	SRR5899849	Ex	BA41
20141113B_1C04_S60	SC_UCSD_3382	20141113B	Ex1	Ex1BA41	Smart+Poly	Small	Frozen DMSO	1568-BA41/BA42-sec17	SRR5900556	Ex	BA41
20141113B_1C07_S92	SC_UCSD_3011	20141113B	Ex1	Ex1BA41	Smart+Poly	Small	Frozen DMSO	1568-BA41/BA42-sec17	SRR5900185	Ex	BA41
20141113B_1C08_S32	SC_UCSD_3349	20141113B	Ex1	Ex1BA41	Smart+Poly	Small	Frozen DMSO	1568-BA41/BA42-sec17	SRR5900523	Ex	BA41
20141113B_1C09_S79	SC_UCSD_2611	20141113B	Ex1	Ex1BA41	Smart+Poly	Small	Frozen DMSO	1568-BA41/BA42-sec17	SRR5899785	Ex	BA41
20141113B_1C20_S44	SC_UCSD_2124	20141113B	Ex1	Ex1BA41	Smart+Poly	Small	Frozen DMSO	1568-BA41/BA42-sec17	SRR5899298	Ex	BA41
20141113B_1C23_S24	SC_UCSD_3493	20141113B	Ex1	Ex1BA41	Smart+Poly	Small	Frozen DMSO	1568-BA41/BA42-sec17	SRR5900667	Ex	BA41
20141113B_1C24_S35	SC_UCSD_3800	20141113B	Ex1	Ex1BA41	Smart+Poly	Small	Frozen DMSO	1568-BA41/BA42-sec17	SRR5900974	Ex	BA41
20141113B_1C27_S9	SC_UCSD_3842	20141113B	Ex1	Ex1BA41	Smart+Poly	Small	Frozen DMSO	1568-BA41/BA42-sec17	SRR5901016	Ex	BA41
20141113B_1C30_S84	SC_UCSD_2517	20141113B	Ex1	Ex1BA41	Smart+Poly	Small	Frozen DMSO	1568-BA41/BA42-sec17	SRR5899691	Ex	BA41
20141113B_1C35_S36	SC_UCSD_2032	20141113B	Ex1	Ex1BA41	Smart+Poly	Small	Frozen DMSO	1568-BA41/BA42-sec17	SRR5899206	Ex	BA41
20141113B_1C43_S8	SC_UCSD_3183	20141113B	Ex1	Ex1BA41	Smart+Poly	Small	Frozen DMSO	1568-BA41/BA42-sec17	SRR5900357	Ex	BA41
20141113B_1C49_S21	SC_UCSD_2939	20141113B	Ex1	Ex1BA41	Smart+Poly	Small	Frozen DMSO	1568-BA41/BA42-sec17	SRR5900113	Ex	BA41
20141113B_1C55_S33	SC_UCSD_2622	20141113B	Ex1	Ex1BA41	Smart+Poly	Small	Frozen DMSO	1568-BA41/BA42-sec17	SRR5899796	Ex	BA41
20141113B_1C56_S81	SC_UCSD_3474	20141113B	Ex1	Ex1BA41	Smart+Poly	Small	Frozen DMSO	1568-BA41/BA42-sec17	SRR5900648	Ex	BA41
20141113B_1C57_S58	SC_UCSD_2795	20141113B	Ex1	Ex1BA41	Smart+Poly	Small	Frozen DMSO	1568-BA41/BA42-sec17	SRR5899969	Ex	BA41
20141113B_1C59_S73	SC_UCSD_3866	20141113B	Ex1	Ex1BA41	Smart+Poly	Small	Frozen DMSO	1568-BA41/BA42-sec17	SRR5901040	Ex	BA41
20141113B_1C64_S25	SC_UCSD_2299	20141113B	Ex1	Ex1BA41	Smart+Poly	Small	Frozen DMSO	1568-BA41/BA42-sec17	SRR5899473	Ex	BA41
20141113B_1C67_S45	SC_UCSD_2773	20141113B	Ex1	Ex1BA41	Smart+Poly	Small	Frozen DMSO	1568-BA41/BA42-sec17	SRR5899947	Ex	BA41
20141113B_1C71_S85	SC_UCSD_1977	20141113B	Ex1	Ex1BA41	Smart+Poly	Small	Frozen DMSO	1568-BA41/BA42-sec17	SRR5899151	Ex	BA41
20141113B_1C73_S82	SC_UCSD_2790	20141113B	Ex1	Ex1BA41	Smart+Poly	Small	Frozen DMSO	1568-BA41/BA42-sec17	SRR5899964	Ex	BA41
20141113B_1C75_S57	SC_UCSD_3475	20141113B	Ex1	Ex1BA41	Smart+Poly	Small	Frozen DMSO	1568-BA41/BA42-sec17	SRR5900649	Ex	BA41
20141113B_1C76_S50	SC_UCSD_2311	20141113B	Ex1	Ex1BA41	Smart+Poly	Small	Frozen DMSO	1568-BA41/BA42-sec17	SRR5899485	Ex	BA41
20141113B_1C78_S37	SC_UCSD_1940	20141113B	Ex1	Ex1BA41	Smart+Poly	Small	Frozen DMSO	1568-BA41/BA42-sec17	SRR5899114	Ex	BA41
20141113B_1C82_S62	SC_UCSD_3337	20141113B	Ex1	Ex1BA41	Smart+Poly	Small	Frozen DMSO	1568-BA41/BA42-sec17	SRR5900511	Ex	BA41
20141113B_1C85_S94	SC_UCSD_2374	20141113B	Ex1	Ex1BA41	Smart+Poly	Small	Frozen DMSO	1568-BA41/BA42-sec17	SRR5899548	Ex	BA41
20141113B_1C89_S14	SC_UCSD_2048	20141113B	Ex1	Ex1BA41	Smart+Poly	Small	Frozen DMSO	1568-BA41/BA42-sec17	SRR5899222	Ex	BA41
20141117A_1C01_S75	SC_UCSD_1929	20141117A	Ex1	Ex1BA41	Smart+Poly	Small	Frozen DMSO	1568-BA41/BA42-sec17	SRR5899103	Ex	BA41
20141117A_1C04_S8	SC_UCSD_3428	20141117A	Ex1	Ex1BA41	Smart+Poly	Small	Frozen DMSO	1568-BA41/BA42-sec17	SRR5900602	Ex	BA41
20141117A_1C05_S7	SC_UCSD_2121	20141117A	Ex1	Ex1BA41	Smart+Poly	Small	Frozen DMSO	1568-BA41/BA42-sec17	SRR5899295	Ex	BA41
20141117A_1C06_S42	SC_UCSD_3197	20141117A	Ex1	Ex1BA41	Smart+Poly	Small	Frozen DMSO	1568-BA41/BA42-sec17	SRR5900371	Ex	BA41
20141117A_1C08_S39	SC_UCSD_2375	20141117A	Ex1	Ex1BA41	Smart+Poly	Small	Frozen DMSO	1568-BA41/BA42-sec17	SRR5899549	Ex	BA41
20141117A_1C15_S86	SC_UCSD_3504	20141117A	Ex1	Ex1BA41	Smart+Poly	Small	Frozen DMSO	1568-BA41/BA42-sec17	SRR5900678	Ex	BA41
20141117A_1C20_S51	SC_UCSD_2023	20141117A	Ex1	Ex1BA41	Smart+Poly	Small	Frozen DMSO	1568-BA41/BA42-sec17	SRR5899197	Ex	BA41
20141117A_1C23_S43	SC_UCSD_3667	20141117A	Ex1	Ex1BA41	Smart+Poly	Small	Frozen DMSO	1568-BA41/BA42-sec17	SRR5900841	Ex	BA41
20141117A_1C24_S54	SC_UCSD_3707	20141117A	Ex1	Ex1BA41	Smart+Poly	Small	Frozen DMSO	1568-BA41/BA42-sec17	SRR5900881	Ex	BA41
20141117A_1C25_S3	SC_UCSD_3421	20141117A	Ex1	Ex1BA41	Smart+Poly	Small	Frozen DMSO	1568-BA41/BA42-sec17	SRR5900595	Ex	BA41
20141117A_1C27_S4	SC_UCSD_2243	20141117A	Ex1	Ex1BA41	Smart+Poly	Small	Frozen DMSO	1568-BA41/BA42-sec17	SRR5899417	Ex	BA41
20141117A_1C35_S67	SC_UCSD_2767	20141117A	Ex1	Ex1BA41	Smart+Poly	Small	Frozen DMSO	1568-BA41/BA42-sec17	SRR5899941	Ex	BA41
20141117A_1C36_S32	SC_UCSD_3717	20141117A	Ex1	Ex1BA41	Smart+Poly	Small	Frozen DMSO	1568-BA41/BA42-sec17	SRR5900891	Ex	BA41
20141117A_1C45_S40	SC_UCSD_3427	20141117A	Ex1	Ex1BA41	Smart+Poly	Small	Frozen DMSO	1568-BA41/BA42-sec17	SRR5900601	Ex	BA41
20141117A_1C47_S91	SC_UCSD_2218	20141117A	Ex1	Ex1BA41	Smart+Poly	Small	Frozen DMSO	1568-BA41/BA42-sec17	SRR5899392	Ex	BA41
20141117A_1C51_S77	SC_UCSD_2257	20141117A	Ex1	Ex1BA41	Smart+Poly	Small	Frozen DMSO	1568-BA41/BA42-sec17	SRR5899431	Ex	BA41
20141117A_1C53_S92	SC_UCSD_3676	20141117A	Ex1	Ex1BA41	Smart+Poly	Small	Frozen DMSO	1568-BA41/BA42-sec17	SRR5900850	Ex	BA41
20141117A_1C63_S89	SC_UCSD_3235	20141117A	Ex1	Ex1BA41	Smart+Poly	Small	Frozen DMSO	1568-BA41/BA42-sec17	SRR5900409	Ex	BA41
20141117A_1C66_S81	SC_UCSD_2067	20141117A	Ex1	Ex1BA41	Smart+Poly	Small	Frozen DMSO	1568-BA41/BA42-sec17	SRR5899241	Ex	BA41
20141117A_1C68_S41	SC_UCSD_3138	20141117A	Ex1	Ex1BA41	Smart+Poly	Small	Frozen DMSO	1568-BA41/BA42-sec17	SRR5900312	Ex	BA41
20141117A_1C69_S6	SC_UCSD_3044	20141117A	Ex1	Ex1BA41	Smart+Poly	Small	Frozen DMSO	1568-BA41/BA42-sec17	SRR5900218	Ex	BA41
20141117A_1C71_S33	SC_UCSD_2186	20141117A	Ex1	Ex1BA41	Smart+Poly	Small	Frozen DMSO	1568-BA41/BA42-sec17	SRR5899360	Ex	BA41
20141117A_1C72_S93	SC_UCSD_3449	20141117A	Ex1	Ex1BA41	Smart+Poly	Small	Frozen DMSO	1568-BA41/BA42-sec17	SRR5900623	Ex	BA41
20141117A_1C73_S18	SC_UCSD_2979	20141117A	Ex1	Ex1BA41	Smart+Poly	Small	Frozen DMSO	1568-BA41/BA42-sec17	SRR5900153	Ex	BA41
20141117A_1C78_S56	SC_UCSD_3893	20141117A	Ex1	Ex1BA41	Smart+Poly	Small	Frozen DMSO	1568-BA41/BA42-sec17	SRR5901067	Ex	BA41
20141117A_1C82_S10	SC_UCSD_2578	20141117A	Ex1	Ex1BA41	Smart+Poly	Small	Frozen DMSO	1568-BA41/BA42-sec17	SRR5899752	Ex	BA41
20141117A_1C93_S17	SC_UCSD_2166	20141117A	Ex1	Ex1BA41	Smart+Poly	Small	Frozen DMSO	1568-BA41/BA42-sec17	SRR5899340	Ex	BA41
20141117A_1C95_S69	SC_UCSD_3549	20141117A	Ex1	Ex1BA41	Smart+Poly	Small	Frozen DMSO	1568-BA41/BA42-sec17	SRR5900723	Ex	BA41
20141117A_1C96_S80	SC_UCSD_2572	20141117A	Ex1	Ex1BA41	Smart+Poly	Small	Frozen DMSO	1568-BA41/BA42-sec17	SRR5899746	Ex	BA41
20141117B_1C02_S11	SC_UCSD_3856	20141117B	Ex1	Ex1BA41	Smart+Poly	Small	Frozen DMSO	1568-BA41/BA42-sec17	SRR5901030	Ex	BA41
20141117B_1C15_S46	SC_UCSD_2438	20141117B	Ex1	Ex1BA41	Smart+Poly	Small	Frozen DMSO	1568-BA41/BA42-sec17	SRR5899612	Ex	BA41
20141117B_1C16_S51	SC_UCSD_2168	20141117B	Ex1	Ex1BA41	Smart+Poly	Small	Frozen DMSO	1568-BA41/BA42-sec17	SRR5899342	Ex	BA41
20141117B_1C19_S59	SC_UCSD_3718	20141117B	Ex1	Ex1BA41	Smart+Poly	Small	Frozen DMSO	1568-BA41/BA42-sec17	SRR5900892	Ex	BA41
20141117B_1C23_S3	SC_UCSD_3650	20141117B	Ex1	Ex1BA41	Smart+Poly	Small	Frozen DMSO	1568-BA41/BA42-sec17	SRR5900824	Ex	BA41
20141117B_1C24_S26	SC_UCSD_2471	20141117B	Ex1	Ex1BA41	Smart+Poly	Small	Frozen DMSO	1568-BA41/BA42-sec17	SRR5899645	Ex	BA41
20141117B_1C25_S70	SC_UCSD_2642	20141117B	Ex1	Ex1BA41	Smart+Poly	Small	Frozen DMSO	1568-BA41/BA42-sec17	SRR5899816	Ex	BA41
20141117B_1C30_S63	SC_UCSD_2908	20141117B	Ex1	Ex1BA41	Smart+Poly	Small	Frozen DMSO	1568-BA41/BA42-sec17	SRR5900082	Ex	BA41
20141117B_1C31_S82	SC_UCSD_2678	20141117B	Ex1	Ex1BA41	Smart+Poly	Small	Frozen DMSO	1568-BA41/BA42-sec17	SRR5899852	Ex	BA41
20141117B_1C33_S71	SC_UCSD_2024	20141117B	Ex1	Ex1BA41	Smart+Poly	Small	Frozen DMSO	1568-BA41/BA42-sec17	SRR5899198	Ex	BA41
20141117B_1C39_S83	SC_UCSD_2802	20141117B	Ex1	Ex1BA41	Smart+Poly	Small	Frozen DMSO	1568-BA41/BA42-sec17	SRR5899976	Ex	BA41
20141117B_1C43_S94	SC_UCSD_3226	20141117B	Ex1	Ex1BA41	Smart+Poly	Small	Frozen DMSO	1568-BA41/BA42-sec17	SRR5900400	Ex	BA41
20141117B_1C48_S87	SC_UCSD_2314	20141117B	Ex1	Ex1BA41	Smart+Poly	Small	Frozen DMSO	1568-BA41/BA42-sec17	SRR5899488	Ex	BA41
20141117B_1C54_S17	SC_UCSD_3740	20141117B	Ex1	Ex1BA41	Smart+Poly	Small	Frozen DMSO	1568-BA41/BA42-sec17	SRR5900914	Ex	BA41
20141117B_1C57_S37	SC_UCSD_3556	20141117B	Ex1	Ex1BA41	Smart+Poly	Small	Frozen DMSO	1568-BA41/BA42-sec17	SRR5900730	Ex	BA41
20141117B_1C58_S16	SC_UCSD_2503	20141117B	Ex1	Ex1BA41	Smart+Poly	Small	Frozen DMSO	1568-BA41/BA42-sec17	SRR5899677	Ex	BA41
20141117B_1C59_S52	SC_UCSD_2924	20141117B	Ex1	Ex1BA41	Smart+Poly	Small	Frozen DMSO	1568-BA41/BA42-sec17	SRR5900098	Ex	BA41
20141117B_1C61_S24	SC_UCSD_3533	20141117B	Ex1	Ex1BA41	Smart+Poly	Small	Frozen DMSO	1568-BA41/BA42-sec17	SRR5900707	Ex	BA41
20141117B_1C71_S64	SC_UCSD_2530	20141117B	Ex1	Ex1BA41	Smart+Poly	Small	Frozen DMSO	1568-BA41/BA42-sec17	SRR5899704	Ex	BA41
20141117B_1C73_S61	SC_UCSD_2849	20141117B	Ex1	Ex1BA41	Smart+Poly	Small	Frozen DMSO	1568-BA41/BA42-sec17	SRR5900023	Ex	BA41
20141117B_1C74_S96	SC_UCSD_3634	20141117B	Ex1	Ex1BA41	Smart+Poly	Small	Frozen DMSO	1568-BA41/BA42-sec17	SRR5900808	Ex	BA41
20141117B_1C75_S36	SC_UCSD_2730	20141117B	Ex1	Ex1BA41	Smart+Poly	Small	Frozen DMSO	1568-BA41/BA42-sec17	SRR5899904	Ex	BA41
20141117B_1C77_S76	SC_UCSD_3540	20141117B	Ex1	Ex1BA41	Smart+Poly	Small	Frozen DMSO	1568-BA41/BA42-sec17	SRR5900714	Ex	BA41
20141117B_1C80_S1	SC_UCSD_3356	20141117B	Ex1	Ex1BA41	Smart+Poly	Small	Frozen DMSO	1568-BA41/BA42-sec17	SRR5900530	Ex	BA41
20141117B_1C81_S48	SC_UCSD_2119	20141117B	Ex1	Ex1BA41	Smart+Poly	Small	Frozen DMSO	1568-BA41/BA42-sec17	SRR5899293	Ex	BA41
20141117B_1C86_S13	SC_UCSD_3571	20141117B	Ex1	Ex1BA41	Smart+Poly	Small	Frozen DMSO	1568-BA41/BA42-sec17	SRR5900745	Ex	BA41
20141117B_1C91_S73	SC_UCSD_2400	20141117B	Ex1	Ex1BA41	Smart+Poly	Small	Frozen DMSO	1568-BA41/BA42-sec17	SRR5899574	Ex	BA41
20141117B_1C92_S25	SC_UCSD_2491	20141117B	Ex1	Ex1BA41	Smart+Poly	Small	Frozen DMSO	1568-BA41/BA42-sec17	SRR5899665	Ex	BA41
20141118A_1C06_S10	SC_UCSD_2891	20141118A	Ex1	Ex1BA41	Smart+Poly	Small	Frozen DMSO	1568-BA41/BA42-sec17	SRR5900065	Ex	BA41
20141118A_1C07_S7	SC_UCSD_2768	20141118A	Ex1	Ex1BA41	Smart+Poly	Small	Frozen DMSO	1568-BA41/BA42-sec17	SRR5899942	Ex	BA41
20141118A_1C10_S94	SC_UCSD_2356	20141118A	Ex1	Ex1BA41	Smart+Poly	Small	Frozen DMSO	1568-BA41/BA42-sec17	SRR5899530	Ex	BA41
20141118A_1C23_S46	SC_UCSD_2012	20141118A	Ex1	Ex1BA41	Smart+Poly	Small	Frozen DMSO	1568-BA41/BA42-sec17	SRR5899186	Ex	BA41
20141118A_1C25_S89	SC_UCSD_3376	20141118A	Ex1	Ex1BA41	Smart+Poly	Small	Frozen DMSO	1568-BA41/BA42-sec17	SRR5900550	Ex	BA41
20141118A_1C26_S54	SC_UCSD_3323	20141118A	Ex1	Ex1BA41	Smart+Poly	Small	Frozen DMSO	1568-BA41/BA42-sec17	SRR5900497	Ex	BA41
20141118A_1C28_S34	SC_UCSD_1970	20141118A	Ex1	Ex1BA41	Smart+Poly	Small	Frozen DMSO	1568-BA41/BA42-sec17	SRR5899144	Ex	BA41
20141118A_1C30_S23	SC_UCSD_3131	20141118A	Ex1	Ex1BA41	Smart+Poly	Small	Frozen DMSO	1568-BA41/BA42-sec17	SRR5900305	Ex	BA41
20141118A_1C36_S35	SC_UCSD_3535	20141118A	Ex1	Ex1BA41	Smart+Poly	Small	Frozen DMSO	1568-BA41/BA42-sec17	SRR5900709	Ex	BA41
20141118A_1C44_S78	SC_UCSD_3266	20141118A	Ex1	Ex1BA41	Smart+Poly	Small	Frozen DMSO	1568-BA41/BA42-sec17	SRR5900440	Ex	BA41
20141118A_1C54_S84	SC_UCSD_1882	20141118A	Ex1	Ex1BA41	Smart+Poly	Small	Frozen DMSO	1568-BA41/BA42-sec17	SRR5899056	Ex	BA41
20141118A_1C56_S56	SC_UCSD_1917	20141118A	Ex1	Ex1BA41	Smart+Poly	Small	Frozen DMSO	1568-BA41/BA42-sec17	SRR5899091	Ex	BA41
20141118A_1C57_S33	SC_UCSD_3065	20141118A	Ex1	Ex1BA41	Smart+Poly	Small	Frozen DMSO	1568-BA41/BA42-sec17	SRR5900239	Ex	BA41
20141118A_1C58_S71	SC_UCSD_3315	20141118A	Ex1	Ex1BA41	Smart+Poly	Small	Frozen DMSO	1568-BA41/BA42-sec17	SRR5900489	Ex	BA41
20141118A_1C60_S96	SC_UCSD_2018	20141118A	Ex1	Ex1BA41	Smart+Poly	Small	Frozen DMSO	1568-BA41/BA42-sec17	SRR5899192	Ex	BA41
20141118A_1C67_S8	SC_UCSD_3480	20141118A	Ex1	Ex1BA41	Smart+Poly	Small	Frozen DMSO	1568-BA41/BA42-sec17	SRR5900654	Ex	BA41
20141118A_1C68_S68	SC_UCSD_3093	20141118A	Ex1	Ex1BA41	Smart+Poly	Small	Frozen DMSO	1568-BA41/BA42-sec17	SRR5900267	Ex	BA41
20141118A_1C71_S48	SC_UCSD_2576	20141118A	Ex1	Ex1BA41	Smart+Poly	Small	Frozen DMSO	1568-BA41/BA42-sec17	SRR5899750	Ex	BA41
20141118A_1C73_S57	SC_UCSD_3641	20141118A	Ex1	Ex1BA41	Smart+Poly	Small	Frozen DMSO	1568-BA41/BA42-sec17	SRR5900815	Ex	BA41
20141118A_1C74_S80	SC_UCSD_2575	20141118A	Ex1	Ex1BA41	Smart+Poly	Small	Frozen DMSO	1568-BA41/BA42-sec17	SRR5899749	Ex	BA41
20141118A_1C83_S60	SC_UCSD_2377	20141118A	Ex1	Ex1BA41	Smart+Poly	Small	Frozen DMSO	1568-BA41/BA42-sec17	SRR5899551	Ex	BA41
20141118A_1C86_S9	SC_UCSD_1933	20141118A	Ex1	Ex1BA41	Smart+Poly	Small	Frozen DMSO	1568-BA41/BA42-sec17	SRR5899107	Ex	BA41
20141118A_1C89_S72	SC_UCSD_2355	20141118A	Ex1	Ex1BA41	Smart+Poly	Small	Frozen DMSO	1568-BA41/BA42-sec17	SRR5899529	Ex	BA41
20141118A_1C90_S24	SC_UCSD_1997	20141118A	Ex1	Ex1BA41	Smart+Poly	Small	Frozen DMSO	1568-BA41/BA42-sec17	SRR5899171	Ex	BA41
20141118A_1C91_S93	SC_UCSD_3521	20141118A	Ex1	Ex1BA41	Smart+Poly	Small	Frozen DMSO	1568-BA41/BA42-sec17	SRR5900695	Ex	BA41
20141118A_1C94_S28	SC_UCSD_2340	20141118A	Ex1	Ex1BA41	Smart+Poly	Small	Frozen DMSO	1568-BA41/BA42-sec17	SRR5899514	Ex	BA41
20141118B_1C05_S64	SC_UCSD_2051	20141118B	Ex1	Ex1BA41	Smart+Poly	Small	Frozen DMSO	1568-BA41/BA42-sec17	SRR5899225	Ex	BA41
20141118B_1C10_S57	SC_UCSD_3814	20141118B	Ex1	Ex1BA41	Smart+Poly	Small	Frozen DMSO	1568-BA41/BA42-sec17	SRR5900988	Ex	BA41
20141118B_1C12_S32	SC_UCSD_2325	20141118B	Ex1	Ex1BA41	Smart+Poly	Small	Frozen DMSO	1568-BA41/BA42-sec17	SRR5899499	Ex	BA41
20141118B_1C26_S29	SC_UCSD_2212	20141118B	Ex1	Ex1BA41	Smart+Poly	Small	Frozen DMSO	1568-BA41/BA42-sec17	SRR5899386	Ex	BA41
20141118B_1C27_S3	SC_UCSD_2539	20141118B	Ex1	Ex1BA41	Smart+Poly	Small	Frozen DMSO	1568-BA41/BA42-sec17	SRR5899713	Ex	BA41
20141118B_1C29_S24	SC_UCSD_3473	20141118B	Ex1	Ex1BA41	Smart+Poly	Small	Frozen DMSO	1568-BA41/BA42-sec17	SRR5900647	Ex	BA41
20141118B_1C30_S16	SC_UCSD_2055	20141118B	Ex1	Ex1BA41	Smart+Poly	Small	Frozen DMSO	1568-BA41/BA42-sec17	SRR5899229	Ex	BA41
20141118B_1C33_S12	SC_UCSD_2382	20141118B	Ex1	Ex1BA41	Smart+Poly	Small	Frozen DMSO	1568-BA41/BA42-sec17	SRR5899556	Ex	BA41
20141118B_1C34_S48	SC_UCSD_3794	20141118B	Ex1	Ex1BA41	Smart+Poly	Small	Frozen DMSO	1568-BA41/BA42-sec17	SRR5900968	Ex	BA41
20141118B_1C46_S56	SC_UCSD_1919	20141118B	Ex1	Ex1BA41	Smart+Poly	Small	Frozen DMSO	1568-BA41/BA42-sec17	SRR5899093	Ex	BA41
20141118B_1C53_S66	SC_UCSD_2738	20141118B	Ex1	Ex1BA41	Smart+Poly	Small	Frozen DMSO	1568-BA41/BA42-sec17	SRR5899912	Ex	BA41
20141118B_1C54_S51	SC_UCSD_3761	20141118B	Ex1	Ex1BA41	Smart+Poly	Small	Frozen DMSO	1568-BA41/BA42-sec17	SRR5900935	Ex	BA41
20141118B_1C55_S46	SC_UCSD_3397	20141118B	Ex1	Ex1BA41	Smart+Poly	Small	Frozen DMSO	1568-BA41/BA42-sec17	SRR5900571	Ex	BA41
20141118B_1C75_S62	SC_UCSD_3207	20141118B	Ex1	Ex1BA41	Smart+Poly	Small	Frozen DMSO	1568-BA41/BA42-sec17	SRR5900381	Ex	BA41
20141118B_1C77_S17	SC_UCSD_2811	20141118B	Ex1	Ex1BA41	Smart+Poly	Small	Frozen DMSO	1568-BA41/BA42-sec17	SRR5899985	Ex	BA41
20141118B_1C79_S14	SC_UCSD_2358	20141118B	Ex1	Ex1BA41	Smart+Poly	Small	Frozen DMSO	1568-BA41/BA42-sec17	SRR5899532	Ex	BA41
20141118B_1C85_S23	SC_UCSD_3208	20141118B	Ex1	Ex1BA41	Smart+Poly	Small	Frozen DMSO	1568-BA41/BA42-sec17	SRR5900382	Ex	BA41
20141118B_1C87_S4	SC_UCSD_3588	20141118B	Ex1	Ex1BA41	Smart+Poly	Small	Frozen DMSO	1568-BA41/BA42-sec17	SRR5900762	Ex	BA41
20141118B_1C89_S35	SC_UCSD_2448	20141118B	Ex1	Ex1BA41	Smart+Poly	Small	Frozen DMSO	1568-BA41/BA42-sec17	SRR5899622	Ex	BA41
20141118B_1C93_S13	SC_UCSD_2271	20141118B	Ex1	Ex1BA41	Smart+Poly	Small	Frozen DMSO	1568-BA41/BA42-sec17	SRR5899445	Ex	BA41
20141118B_1C96_S58	SC_UCSD_3072	20141118B	Ex1	Ex1BA41	Smart+Poly	Small	Frozen DMSO	1568-BA41/BA42-sec17	SRR5900246	Ex	BA41
20141202A_1C10_S89	SC_UCSD_2599	20141202A	Ex1	Ex1BA41	Smart+Poly	Small	Frozen DMSO	1568-BA41/BA42-sec17	SRR5899773	Ex	BA41
20141202A_1C13_S50	SC_UCSD_2062	20141202A	Ex1	Ex1BA41	Smart+Poly	Small	Frozen DMSO	1568-BA41/BA42-sec17	SRR5899236	Ex	BA41
20141202A_1C16_S6	SC_UCSD_2793	20141202A	Ex1	Ex1BA41	Smart+Poly	Small	Frozen DMSO	1568-BA41/BA42-sec17	SRR5899967	Ex	BA41
20141202A_1C19_S62	SC_UCSD_3161	20141202A	Ex1	Ex1BA41	Smart+Poly	Small	Frozen DMSO	1568-BA41/BA42-sec17	SRR5900335	Ex	BA41
20141202A_1C20_S85	SC_UCSD_3151	20141202A	Ex1	Ex1BA41	Smart+Poly	Small	Frozen DMSO	1568-BA41/BA42-sec17	SRR5900325	Ex	BA41
20141202A_1C24_S29	SC_UCSD_3176	20141202A	Ex1	Ex1BA41	Smart+Poly	Small	Frozen DMSO	1568-BA41/BA42-sec17	SRR5900350	Ex	BA41
20141202A_1C30_S30	SC_UCSD_3230	20141202A	Ex1	Ex1BA41	Smart+Poly	Small	Frozen DMSO	1568-BA41/BA42-sec17	SRR5900404	Ex	BA41
20141202A_1C31_S25	SC_UCSD_3590	20141202A	Ex1	Ex1BA41	Smart+Poly	Small	Frozen DMSO	1568-BA41/BA42-sec17	SRR5900764	Ex	BA41
20141202A_1C35_S65	SC_UCSD_3656	20141202A	Ex1	Ex1BA41	Smart+Poly	Small	Frozen DMSO	1568-BA41/BA42-sec17	SRR5900830	Ex	BA41
20141202A_1C37_S37	SC_UCSD_3374	20141202A	Ex1	Ex1BA41	Smart+Poly	Small	Frozen DMSO	1568-BA41/BA42-sec17	SRR5900548	Ex	BA41
20141202A_1C41_S77	SC_UCSD_3133	20141202A	Ex1	Ex1BA41	Smart+Poly	Small	Frozen DMSO	1568-BA41/BA42-sec17	SRR5900307	Ex	BA41
20141202A_1C43_S49	SC_UCSD_3124	20141202A	Ex1	Ex1BA41	Smart+Poly	Small	Frozen DMSO	1568-BA41/BA42-sec17	SRR5900298	Ex	BA41
20141202A_1C44_S26	SC_UCSD_3137	20141202A	Ex1	Ex1BA41	Smart+Poly	Small	Frozen DMSO	1568-BA41/BA42-sec17	SRR5900311	Ex	BA41
20141202A_1C45_S3	SC_UCSD_2991	20141202A	Ex1	Ex1BA41	Smart+Poly	Small	Frozen DMSO	1568-BA41/BA42-sec17	SRR5900165	Ex	BA41
20141202A_1C60_S8	SC_UCSD_3705	20141202A	Ex1	Ex1BA41	Smart+Poly	Small	Frozen DMSO	1568-BA41/BA42-sec17	SRR5900879	Ex	BA41
20141202A_1C61_S27	SC_UCSD_3795	20141202A	Ex1	Ex1BA41	Smart+Poly	Small	Frozen DMSO	1568-BA41/BA42-sec17	SRR5900969	Ex	BA41
20141202A_1C66_S20	SC_UCSD_2275	20141202A	Ex1	Ex1BA41	Smart+Poly	Small	Frozen DMSO	1568-BA41/BA42-sec17	SRR5899449	Ex	BA41
20141202A_1C67_S39	SC_UCSD_2014	20141202A	Ex1	Ex1BA41	Smart+Poly	Small	Frozen DMSO	1568-BA41/BA42-sec17	SRR5899188	Ex	BA41
20141202A_1C68_S16	SC_UCSD_3477	20141202A	Ex1	Ex1BA41	Smart+Poly	Small	Frozen DMSO	1568-BA41/BA42-sec17	SRR5900651	Ex	BA41
20141202A_1C70_S90	SC_UCSD_3911	20141202A	Ex1	Ex1BA41	Smart+Poly	Small	Frozen DMSO	1568-BA41/BA42-sec17	SRR5901085	Ex	BA41
20141202A_1C73_S64	SC_UCSD_3821	20141202A	Ex1	Ex1BA41	Smart+Poly	Small	Frozen DMSO	1568-BA41/BA42-sec17	SRR5900995	Ex	BA41
20141202A_1C75_S51	SC_UCSD_1930	20141202A	Ex1	Ex1BA41	Smart+Poly	Small	Frozen DMSO	1568-BA41/BA42-sec17	SRR5899104	Ex	BA41
20141202A_1C77_S55	SC_UCSD_2329	20141202A	Ex1	Ex1BA41	Smart+Poly	Small	Frozen DMSO	1568-BA41/BA42-sec17	SRR5899503	Ex	BA41
20141202A_1C79_S76	SC_UCSD_3446	20141202A	Ex1	Ex1BA41	Smart+Poly	Small	Frozen DMSO	1568-BA41/BA42-sec17	SRR5900620	Ex	BA41
20141202A_1C83_S67	SC_UCSD_2047	20141202A	Ex1	Ex1BA41	Smart+Poly	Small	Frozen DMSO	1568-BA41/BA42-sec17	SRR5899221	Ex	BA41
20141202A_1C89_S79	SC_UCSD_3884	20141202A	Ex1	Ex1BA41	Smart+Poly	Small	Frozen DMSO	1568-BA41/BA42-sec17	SRR5901058	Ex	BA41
20141202A_1C91_S5	SC_UCSD_2983	20141202A	Ex1	Ex1BA41	Smart+Poly	Small	Frozen DMSO	1568-BA41/BA42-sec17	SRR5900157	Ex	BA41
20141202A_1C93_S63	SC_UCSD_2176	20141202A	Ex1	Ex1BA41	Smart+Poly	Small	Frozen DMSO	1568-BA41/BA42-sec17	SRR5899350	Ex	BA41
20141202A_1C94_S44	SC_UCSD_3247	20141202A	Ex1	Ex1BA41	Smart+Poly	Small	Frozen DMSO	1568-BA41/BA42-sec17	SRR5900421	Ex	BA41
20141202A_1C95_S91	SC_UCSD_3536	20141202A	Ex1	Ex1BA41	Smart+Poly	Small	Frozen DMSO	1568-BA41/BA42-sec17	SRR5900710	Ex	BA41
20141202A_1C96_S43	SC_UCSD_3917	20141202A	Ex1	Ex1BA41	Smart+Poly	Small	Frozen DMSO	1568-BA41/BA42-sec17	SRR5901091	Ex	BA41
20141202B_1C06_S12	SC_UCSD_2238	20141202B	Ex1	Ex1BA41	Smart+Poly	Small	Frozen DMSO	1568-BA41/BA42-sec17	SRR5899412	Ex	BA41
20141202B_1C11_S84	SC_UCSD_2588	20141202B	Ex1	Ex1BA41	Smart+Poly	Small	Frozen DMSO	1568-BA41/BA42-sec17	SRR5899762	Ex	BA41
20141202B_1C19_S10	SC_UCSD_3786	20141202B	Ex1	Ex1BA41	Smart+Poly	Small	Frozen DMSO	1568-BA41/BA42-sec17	SRR5900960	Ex	BA41
20141202B_1C20_S69	SC_UCSD_2823	20141202B	Ex1	Ex1BA41	Smart+Poly	Small	Frozen DMSO	1568-BA41/BA42-sec17	SRR5899997	Ex	BA41
20141202B_1C21_S68	SC_UCSD_2608	20141202B	Ex1	Ex1BA41	Smart+Poly	Small	Frozen DMSO	1568-BA41/BA42-sec17	SRR5899782	Ex	BA41
20141202B_1C22_S49	SC_UCSD_2961	20141202B	Ex1	Ex1BA41	Smart+Poly	Small	Frozen DMSO	1568-BA41/BA42-sec17	SRR5900135	Ex	BA41
20141202B_1C25_S80	SC_UCSD_3527	20141202B	Ex1	Ex1BA41	Smart+Poly	Small	Frozen DMSO	1568-BA41/BA42-sec17	SRR5900701	Ex	BA41
20141202B_1C31_S92	SC_UCSD_3313	20141202B	Ex1	Ex1BA41	Smart+Poly	Small	Frozen DMSO	1568-BA41/BA42-sec17	SRR5900487	Ex	BA41
20141202B_1C34_S60	SC_UCSD_2903	20141202B	Ex1	Ex1BA41	Smart+Poly	Small	Frozen DMSO	1568-BA41/BA42-sec17	SRR5900077	Ex	BA41
20141202B_1C55_S58	SC_UCSD_1911	20141202B	Ex1	Ex1BA41	Smart+Poly	Small	Frozen DMSO	1568-BA41/BA42-sec17	SRR5899085	Ex	BA41
20141202B_1C63_S59	SC_UCSD_2079	20141202B	Ex1	Ex1BA41	Smart+Poly	Small	Frozen DMSO	1568-BA41/BA42-sec17	SRR5899253	Ex	BA41
20141202B_1C80_S35	SC_UCSD_3880	20141202B	Ex1	Ex1BA41	Smart+Poly	Small	Frozen DMSO	1568-BA41/BA42-sec17	SRR5901054	Ex	BA41
20141202B_1C81_S70	SC_UCSD_2810	20141202B	Ex1	Ex1BA41	Smart+Poly	Small	Frozen DMSO	1568-BA41/BA42-sec17	SRR5899984	Ex	BA41
20141202B_1C91_S95	SC_UCSD_3737	20141202B	Ex1	Ex1BA41	Smart+Poly	Small	Frozen DMSO	1568-BA41/BA42-sec17	SRR5900911	Ex	BA41
20141202B_1C96_S85	SC_UCSD_2392	20141202B	Ex1	Ex1BA41	Smart+Poly	Small	Frozen DMSO	1568-BA41/BA42-sec17	SRR5899566	Ex	BA41
20141203A_1C01_S28	SC_UCSD_3321	20141203A	Ex1	Ex1BA41	Smart+Poly	Small	Frozen DMSO	1568-BA41/BA42-sec17	SRR5900495	Ex	BA41
20141203A_1C03_S74	SC_UCSD_2041	20141203A	Ex1	Ex1BA41	Smart+Poly	Small	Frozen DMSO	1568-BA41/BA42-sec17	SRR5899215	Ex	BA41
20141203A_1C04_S78	SC_UCSD_1916	20141203A	Ex1	Ex1BA41	Smart+Poly	Small	Frozen DMSO	1568-BA41/BA42-sec17	SRR5899090	Ex	BA41
20141203A_1C15_S86	SC_UCSD_2160	20141203A	Ex1	Ex1BA41	Smart+Poly	Small	Frozen DMSO	1568-BA41/BA42-sec17	SRR5899334	Ex	BA41
20141203A_1C17_S42	SC_UCSD_2090	20141203A	Ex1	Ex1BA41	Smart+Poly	Small	Frozen DMSO	1568-BA41/BA42-sec17	SRR5899264	Ex	BA41
20141203A_1C19_S52	SC_UCSD_3285	20141203A	Ex1	Ex1BA41	Smart+Poly	Small	Frozen DMSO	1568-BA41/BA42-sec17	SRR5900459	Ex	BA41
20141203A_1C27_S64	SC_UCSD_2203	20141203A	Ex1	Ex1BA41	Smart+Poly	Small	Frozen DMSO	1568-BA41/BA42-sec17	SRR5899377	Ex	BA41
20141203A_1C28_S77	SC_UCSD_3381	20141203A	Ex1	Ex1BA41	Smart+Poly	Small	Frozen DMSO	1568-BA41/BA42-sec17	SRR5900555	Ex	BA41
20141203A_1C30_S7	SC_UCSD_2156	20141203A	Ex1	Ex1BA41	Smart+Poly	Small	Frozen DMSO	1568-BA41/BA42-sec17	SRR5899330	Ex	BA41
20141203A_1C37_S39	SC_UCSD_3682	20141203A	Ex1	Ex1BA41	Smart+Poly	Small	Frozen DMSO	1568-BA41/BA42-sec17	SRR5900856	Ex	BA41
20141203A_1C39_S88	SC_UCSD_2237	20141203A	Ex1	Ex1BA41	Smart+Poly	Small	Frozen DMSO	1568-BA41/BA42-sec17	SRR5899411	Ex	BA41
20141203A_1C43_S51	SC_UCSD_2363	20141203A	Ex1	Ex1BA41	Smart+Poly	Small	Frozen DMSO	1568-BA41/BA42-sec17	SRR5899537	Ex	BA41
20141203A_1C45_S5	SC_UCSD_3735	20141203A	Ex1	Ex1BA41	Smart+Poly	Small	Frozen DMSO	1568-BA41/BA42-sec17	SRR5900909	Ex	BA41
20141203A_1C48_S31	SC_UCSD_3887	20141203A	Ex1	Ex1BA41	Smart+Poly	Small	Frozen DMSO	1568-BA41/BA42-sec17	SRR5901061	Ex	BA41
20141203B_1C06_S70	SC_UCSD_2990	20141203B	Ex1	Ex1BA41	Smart+Poly	Small	Frozen DMSO	1568-BA41/BA42-sec17	SRR5900164	Ex	BA41
20141203B_1C11_S59	SC_UCSD_2350	20141203B	Ex1	Ex1BA41	Smart+Poly	Small	Frozen DMSO	1568-BA41/BA42-sec17	SRR5899524	Ex	BA41
20141203B_1C12_S82	SC_UCSD_3519	20141203B	Ex1	Ex1BA41	Smart+Poly	Small	Frozen DMSO	1568-BA41/BA42-sec17	SRR5900693	Ex	BA41
20141203B_1C15_S55	SC_UCSD_3405	20141203B	Ex1	Ex1BA41	Smart+Poly	Small	Frozen DMSO	1568-BA41/BA42-sec17	SRR5900579	Ex	BA41
20141203B_1C22_S24	SC_UCSD_3501	20141203B	Ex1	Ex1BA41	Smart+Poly	Small	Frozen DMSO	1568-BA41/BA42-sec17	SRR5900675	Ex	BA41
20141203B_1C31_S67	SC_UCSD_2370	20141203B	Ex1	Ex1BA41	Smart+Poly	Small	Frozen DMSO	1568-BA41/BA42-sec17	SRR5899544	Ex	BA41
20141203B_1C33_S44	SC_UCSD_1895	20141203B	Ex1	Ex1BA41	Smart+Poly	Small	Frozen DMSO	1568-BA41/BA42-sec17	SRR5899069	Ex	BA41
20141203B_1C34_S23	SC_UCSD_3113	20141203B	Ex1	Ex1BA41	Smart+Poly	Small	Frozen DMSO	1568-BA41/BA42-sec17	SRR5900287	Ex	BA41
20141203B_1C37_S79	SC_UCSD_3834	20141203B	Ex1	Ex1BA41	Smart+Poly	Small	Frozen DMSO	1568-BA41/BA42-sec17	SRR5901008	Ex	BA41
20141203B_1C39_S56	SC_UCSD_3233	20141203B	Ex1	Ex1BA41	Smart+Poly	Small	Frozen DMSO	1568-BA41/BA42-sec17	SRR5900407	Ex	BA41
20141203B_1C46_S47	SC_UCSD_2519	20141203B	Ex1	Ex1BA41	Smart+Poly	Small	Frozen DMSO	1568-BA41/BA42-sec17	SRR5899693	Ex	BA41
20141203B_1C47_S95	SC_UCSD_2627	20141203B	Ex1	Ex1BA41	Smart+Poly	Small	Frozen DMSO	1568-BA41/BA42-sec17	SRR5899801	Ex	BA41
20141203B_1C60_S49	SC_UCSD_3229	20141203B	Ex1	Ex1BA41	Smart+Poly	Small	Frozen DMSO	1568-BA41/BA42-sec17	SRR5900403	Ex	BA41
20141203B_1C62_S45	SC_UCSD_2488	20141203B	Ex1	Ex1BA41	Smart+Poly	Small	Frozen DMSO	1568-BA41/BA42-sec17	SRR5899662	Ex	BA41
20141203B_1C71_S1	SC_UCSD_2170	20141203B	Ex1	Ex1BA41	Smart+Poly	Small	Frozen DMSO	1568-BA41/BA42-sec17	SRR5899344	Ex	BA41
20141203B_1C83_S13	SC_UCSD_1998	20141203B	Ex1	Ex1BA41	Smart+Poly	Small	Frozen DMSO	1568-BA41/BA42-sec17	SRR5899172	Ex	BA41
20141203B_1C85_S46	SC_UCSD_3495	20141203B	Ex1	Ex1BA41	Smart+Poly	Small	Frozen DMSO	1568-BA41/BA42-sec17	SRR5900669	Ex	BA41
20141203B_1C88_S85	SC_UCSD_2543	20141203B	Ex1	Ex1BA41	Smart+Poly	Small	Frozen DMSO	1568-BA41/BA42-sec17	SRR5899717	Ex	BA41
20141203B_1C90_S72	SC_UCSD_2884	20141203B	Ex1	Ex1BA41	Smart+Poly	Small	Frozen DMSO	1568-BA41/BA42-sec17	SRR5900058	Ex	BA41
20141203B_1C93_S9	SC_UCSD_2483	20141203B	Ex1	Ex1BA41	Smart+Poly	Small	Frozen DMSO	1568-BA41/BA42-sec17	SRR5899657	Ex	BA41
20141204A_1C01_S39	SC_UCSD_2904	20141204A	Ex1	Ex1BA41	Smart+Poly	Small	Frozen DMSO	1568-BA41/BA42-sec17	SRR5900078	Ex	BA41
20141204A_1C02_S50	SC_UCSD_2242	20141204A	Ex1	Ex1BA41	Smart+Poly	Small	Frozen DMSO	1568-BA41/BA42-sec17	SRR5899416	Ex	BA41
20141204A_1C08_S62	SC_UCSD_3853	20141204A	Ex1	Ex1BA41	Smart+Poly	Small	Frozen DMSO	1568-BA41/BA42-sec17	SRR5901027	Ex	BA41
20141204A_1C15_S14	SC_UCSD_2557	20141204A	Ex1	Ex1BA41	Smart+Poly	Small	Frozen DMSO	1568-BA41/BA42-sec17	SRR5899731	Ex	BA41
20141204A_1C16_S79	SC_UCSD_2835	20141204A	Ex1	Ex1BA41	Smart+Poly	Small	Frozen DMSO	1568-BA41/BA42-sec17	SRR5900009	Ex	BA41
20141204A_1C17_S90	SC_UCSD_3874	20141204A	Ex1	Ex1BA41	Smart+Poly	Small	Frozen DMSO	1568-BA41/BA42-sec17	SRR5901048	Ex	BA41
20141204A_1C18_S18	SC_UCSD_3825	20141204A	Ex1	Ex1BA41	Smart+Poly	Small	Frozen DMSO	1568-BA41/BA42-sec17	SRR5900999	Ex	BA41
20141204A_1C19_S63	SC_UCSD_2505	20141204A	Ex1	Ex1BA41	Smart+Poly	Small	Frozen DMSO	1568-BA41/BA42-sec17	SRR5899679	Ex	BA41
20141204A_1C20_S74	SC_UCSD_2133	20141204A	Ex1	Ex1BA41	Smart+Poly	Small	Frozen DMSO	1568-BA41/BA42-sec17	SRR5899307	Ex	BA41
20141204A_1C24_S30	SC_UCSD_2244	20141204A	Ex1	Ex1BA41	Smart+Poly	Small	Frozen DMSO	1568-BA41/BA42-sec17	SRR5899418	Ex	BA41
20141204A_1C32_S3	SC_UCSD_2276	20141204A	Ex1	Ex1BA41	Smart+Poly	Small	Frozen DMSO	1568-BA41/BA42-sec17	SRR5899450	Ex	BA41
20141204A_1C34_S42	SC_UCSD_2641	20141204A	Ex1	Ex1BA41	Smart+Poly	Small	Frozen DMSO	1568-BA41/BA42-sec17	SRR5899815	Ex	BA41
20141204A_1C37_S38	SC_UCSD_3045	20141204A	Ex1	Ex1BA41	Smart+Poly	Small	Frozen DMSO	1568-BA41/BA42-sec17	SRR5900219	Ex	BA41
20141204A_1C46_S54	SC_UCSD_3422	20141204A	Ex1	Ex1BA41	Smart+Poly	Small	Frozen DMSO	1568-BA41/BA42-sec17	SRR5900596	Ex	BA41
20141204A_1C53_S80	SC_UCSD_3612	20141204A	Ex1	Ex1BA41	Smart+Poly	Small	Frozen DMSO	1568-BA41/BA42-sec17	SRR5900786	Ex	BA41
20141204A_1C55_S16	SC_UCSD_3127	20141204A	Ex1	Ex1BA41	Smart+Poly	Small	Frozen DMSO	1568-BA41/BA42-sec17	SRR5900301	Ex	BA41
20141204A_1C57_S77	SC_UCSD_2801	20141204A	Ex1	Ex1BA41	Smart+Poly	Small	Frozen DMSO	1568-BA41/BA42-sec17	SRR5899975	Ex	BA41
20141204A_1C59_S92	SC_UCSD_2697	20141204A	Ex1	Ex1BA41	Smart+Poly	Small	Frozen DMSO	1568-BA41/BA42-sec17	SRR5899871	Ex	BA41
20141204A_1C62_S5	SC_UCSD_3686	20141204A	Ex1	Ex1BA41	Smart+Poly	Small	Frozen DMSO	1568-BA41/BA42-sec17	SRR5900860	Ex	BA41
20141204A_1C65_S9	SC_UCSD_2038	20141204A	Ex1	Ex1BA41	Smart+Poly	Small	Frozen DMSO	1568-BA41/BA42-sec17	SRR5899212	Ex	BA41
20141204A_1C72_S81	SC_UCSD_3614	20141204A	Ex1	Ex1BA41	Smart+Poly	Small	Frozen DMSO	1568-BA41/BA42-sec17	SRR5900788	Ex	BA41
20141204A_1C83_S33	SC_UCSD_1877	20141204A	Ex1	Ex1BA41	Smart+Poly	Small	Frozen DMSO	1568-BA41/BA42-sec17	SRR5899051	Ex	BA41
20141204A_1C84_S44	SC_UCSD_2512	20141204A	Ex1	Ex1BA41	Smart+Poly	Small	Frozen DMSO	1568-BA41/BA42-sec17	SRR5899686	Ex	BA41
20141204A_1C86_S41	SC_UCSD_3912	20141204A	Ex1	Ex1BA41	Smart+Poly	Small	Frozen DMSO	1568-BA41/BA42-sec17	SRR5901086	Ex	BA41
20141204A_1C93_S76	SC_UCSD_2936	20141204A	Ex1	Ex1BA41	Smart+Poly	Small	Frozen DMSO	1568-BA41/BA42-sec17	SRR5900110	Ex	BA41
20141204A_1C96_S68	SC_UCSD_1989	20141204A	Ex1	Ex1BA41	Smart+Poly	Small	Frozen DMSO	1568-BA41/BA42-sec17	SRR5899163	Ex	BA41
20141204B_1C03_S34	SC_UCSD_2289	20141204B	Ex1	Ex1BA41	Smart+Poly	Small	Frozen DMSO	1568-BA41/BA42-sec17	SRR5899463	Ex	BA41
20141204B_1C04_S15	SC_UCSD_1873	20141204B	Ex1	Ex1BA41	Smart+Poly	Small	Frozen DMSO	1568-BA41/BA42-sec17	SRR5899047	Ex	BA41
20141204B_1C05_S37	SC_UCSD_2665	20141204B	Ex1	Ex1BA41	Smart+Poly	Small	Frozen DMSO	1568-BA41/BA42-sec17	SRR5899839	Ex	BA41
20141204B_1C07_S71	SC_UCSD_2447	20141204B	Ex1	Ex1BA41	Smart+Poly	Small	Frozen DMSO	1568-BA41/BA42-sec17	SRR5899621	Ex	BA41
20141204B_1C12_S69	SC_UCSD_2142	20141204B	Ex1	Ex1BA41	Smart+Poly	Small	Frozen DMSO	1568-BA41/BA42-sec17	SRR5899316	Ex	BA41
20141204B_1C17_S59	SC_UCSD_1885	20141204B	Ex1	Ex1BA41	Smart+Poly	Small	Frozen DMSO	1568-BA41/BA42-sec17	SRR5899059	Ex	BA41
20141204B_1C20_S23	SC_UCSD_2502	20141204B	Ex1	Ex1BA41	Smart+Poly	Small	Frozen DMSO	1568-BA41/BA42-sec17	SRR5899676	Ex	BA41
20141204B_1C23_S70	SC_UCSD_1874	20141204B	Ex1	Ex1BA41	Smart+Poly	Small	Frozen DMSO	1568-BA41/BA42-sec17	SRR5899048	Ex	BA41
20141204B_1C29_S81	SC_UCSD_2829	20141204B	Ex1	Ex1BA41	Smart+Poly	Small	Frozen DMSO	1568-BA41/BA42-sec17	SRR5900003	Ex	BA41
20141204B_1C30_S49	SC_UCSD_3637	20141204B	Ex1	Ex1BA41	Smart+Poly	Small	Frozen DMSO	1568-BA41/BA42-sec17	SRR5900811	Ex	BA41
20141204B_1C31_S70	SC_UCSD_3583	20141204B	Ex1	Ex1BA41	Smart+Poly	Small	Frozen DMSO	1568-BA41/BA42-sec17	SRR5900757	Ex	BA41
20141204B_1C34_S14	SC_UCSD_2436	20141204B	Ex1	Ex1BA41	Smart+Poly	Small	Frozen DMSO	1568-BA41/BA42-sec17	SRR5899610	Ex	BA41
20141204B_1C44_S59	SC_UCSD_3753	20141204B	Ex1	Ex1BA41	Smart+Poly	Small	Frozen DMSO	1568-BA41/BA42-sec17	SRR5900927	Ex	BA41
20141204B_1C48_S60	SC_UCSD_2664	20141204B	Ex1	Ex1BA41	Smart+Poly	Small	Frozen DMSO	1568-BA41/BA42-sec17	SRR5899838	Ex	BA41
20141204B_1C50_S84	SC_UCSD_2000	20141204B	Ex1	Ex1BA41	Smart+Poly	Small	Frozen DMSO	1568-BA41/BA42-sec17	SRR5899174	Ex	BA41
20141204B_1C53_S4	SC_UCSD_1981	20141204B	Ex1	Ex1BA41	Smart+Poly	Small	Frozen DMSO	1568-BA41/BA42-sec17	SRR5899155	Ex	BA41
20141204B_1C54_S61	SC_UCSD_3585	20141204B	Ex1	Ex1BA41	Smart+Poly	Small	Frozen DMSO	1568-BA41/BA42-sec17	SRR5900759	Ex	BA41
20141204B_1C55_S24	SC_UCSD_2765	20141204B	Ex1	Ex1BA41	Smart+Poly	Small	Frozen DMSO	1568-BA41/BA42-sec17	SRR5899939	Ex	BA41
20141204B_1C57_S47	SC_UCSD_2137	20141204B	Ex1	Ex1BA41	Smart+Poly	Small	Frozen DMSO	1568-BA41/BA42-sec17	SRR5899311	Ex	BA41
20141204B_1C62_S96	SC_UCSD_2747	20141204B	Ex1	Ex1BA41	Smart+Poly	Small	Frozen DMSO	1568-BA41/BA42-sec17	SRR5899921	Ex	BA41
20141204B_1C66_S83	SC_UCSD_3714	20141204B	Ex1	Ex1BA41	Smart+Poly	Small	Frozen DMSO	1568-BA41/BA42-sec17	SRR5900888	Ex	BA41
20141204B_1C74_S1	SC_UCSD_2279	20141204B	Ex1	Ex1BA41	Smart+Poly	Small	Frozen DMSO	1568-BA41/BA42-sec17	SRR5899453	Ex	BA41
20141204B_1C80_S13	SC_UCSD_3863	20141204B	Ex1	Ex1BA41	Smart+Poly	Small	Frozen DMSO	1568-BA41/BA42-sec17	SRR5901037	Ex	BA41
20141204B_1C95_S50	SC_UCSD_3875	20141204B	Ex1	Ex1BA41	Smart+Poly	Small	Frozen DMSO	1568-BA41/BA42-sec17	SRR5901049	Ex	BA41
20141208A_1C11_S77	SC_UCSD_3591	20141208A	Ex1	Ex1BA41	Smart+Poly	Small	Frozen DMSO	1568-BA41/BA42-sec17	SRR5900765	Ex	BA41
20141208A_1C12_S88	SC_UCSD_2272	20141208A	Ex1	Ex1BA41	Smart+Poly	Small	Frozen DMSO	1568-BA41/BA42-sec17	SRR5899446	Ex	BA41
20141208A_1C13_S26	SC_UCSD_2007	20141208A	Ex1	Ex1BA41	Smart+Poly	Small	Frozen DMSO	1568-BA41/BA42-sec17	SRR5899181	Ex	BA41
20141208A_1C18_S5	SC_UCSD_3023	20141208A	Ex1	Ex1BA41	Smart+Poly	Small	Frozen DMSO	1568-BA41/BA42-sec17	SRR5900197	Ex	BA41
20141208A_1C21_S25	SC_UCSD_3832	20141208A	Ex1	Ex1BA41	Smart+Poly	Small	Frozen DMSO	1568-BA41/BA42-sec17	SRR5901006	Ex	BA41
20141208A_1C25_S37	SC_UCSD_3440	20141208A	Ex1	Ex1BA41	Smart+Poly	Small	Frozen DMSO	1568-BA41/BA42-sec17	SRR5900614	Ex	BA41
20141208A_1C26_S85	SC_UCSD_2222	20141208A	Ex1	Ex1BA41	Smart+Poly	Small	Frozen DMSO	1568-BA41/BA42-sec17	SRR5899396	Ex	BA41
20141208A_1C27_S38	SC_UCSD_2143	20141208A	Ex1	Ex1BA41	Smart+Poly	Small	Frozen DMSO	1568-BA41/BA42-sec17	SRR5899317	Ex	BA41
20141208A_1C28_S29	SC_UCSD_2455	20141208A	Ex1	Ex1BA41	Smart+Poly	Small	Frozen DMSO	1568-BA41/BA42-sec17	SRR5899629	Ex	BA41
20141208A_1C29_S18	SC_UCSD_3214	20141208A	Ex1	Ex1BA41	Smart+Poly	Small	Frozen DMSO	1568-BA41/BA42-sec17	SRR5900388	Ex	BA41
20141208A_1C35_S30	SC_UCSD_1893	20141208A	Ex1	Ex1BA41	Smart+Poly	Small	Frozen DMSO	1568-BA41/BA42-sec17	SRR5899067	Ex	BA41
20141208A_1C44_S2	SC_UCSD_3117	20141208A	Ex1	Ex1BA41	Smart+Poly	Small	Frozen DMSO	1568-BA41/BA42-sec17	SRR5900291	Ex	BA41
20141208A_1C49_S86	SC_UCSD_2972	20141208A	Ex1	Ex1BA41	Smart+Poly	Small	Frozen DMSO	1568-BA41/BA42-sec17	SRR5900146	Ex	BA41
20141208A_1C57_S40	SC_UCSD_2171	20141208A	Ex1	Ex1BA41	Smart+Poly	Small	Frozen DMSO	1568-BA41/BA42-sec17	SRR5899345	Ex	BA41
20141208A_1C59_S20	SC_UCSD_2167	20141208A	Ex1	Ex1BA41	Smart+Poly	Small	Frozen DMSO	1568-BA41/BA42-sec17	SRR5899341	Ex	BA41
20141208A_1C62_S75	SC_UCSD_2420	20141208A	Ex1	Ex1BA41	Smart+Poly	Small	Frozen DMSO	1568-BA41/BA42-sec17	SRR5899594	Ex	BA41
20141208A_1C64_S55	SC_UCSD_2981	20141208A	Ex1	Ex1BA41	Smart+Poly	Small	Frozen DMSO	1568-BA41/BA42-sec17	SRR5900155	Ex	BA41
20141208A_1C65_S32	SC_UCSD_2585	20141208A	Ex1	Ex1BA41	Smart+Poly	Small	Frozen DMSO	1568-BA41/BA42-sec17	SRR5899759	Ex	BA41
20141208A_1C67_S27	SC_UCSD_3597	20141208A	Ex1	Ex1BA41	Smart+Poly	Small	Frozen DMSO	1568-BA41/BA42-sec17	SRR5900771	Ex	BA41
20141208A_1C74_S4	SC_UCSD_2017	20141208A	Ex1	Ex1BA41	Smart+Poly	Small	Frozen DMSO	1568-BA41/BA42-sec17	SRR5899191	Ex	BA41
20141208A_1C75_S39	SC_UCSD_2911	20141208A	Ex1	Ex1BA41	Smart+Poly	Small	Frozen DMSO	1568-BA41/BA42-sec17	SRR5900085	Ex	BA41
20141208A_1C76_S80	SC_UCSD_2110	20141208A	Ex1	Ex1BA41	Smart+Poly	Small	Frozen DMSO	1568-BA41/BA42-sec17	SRR5899284	Ex	BA41
20141208A_1C80_S16	SC_UCSD_2146	20141208A	Ex1	Ex1BA41	Smart+Poly	Small	Frozen DMSO	1568-BA41/BA42-sec17	SRR5899320	Ex	BA41
20141208A_1C85_S64	SC_UCSD_2743	20141208A	Ex1	Ex1BA41	Smart+Poly	Small	Frozen DMSO	1568-BA41/BA42-sec17	SRR5899917	Ex	BA41
20141208A_1C93_S63	SC_UCSD_3532	20141208A	Ex1	Ex1BA41	Smart+Poly	Small	Frozen DMSO	1568-BA41/BA42-sec17	SRR5900706	Ex	BA41
20141208A_1C94_S9	SC_UCSD_3470	20141208A	Ex1	Ex1BA41	Smart+Poly	Small	Frozen DMSO	1568-BA41/BA42-sec17	SRR5900644	Ex	BA41
20141208A_1C96_S91	SC_UCSD_1999	20141208A	Ex1	Ex1BA41	Smart+Poly	Small	Frozen DMSO	1568-BA41/BA42-sec17	SRR5899173	Ex	BA41
20141208B_1C01_S30	SC_UCSD_2894	20141208B	Ex1	Ex1BA41	Smart+Poly	Small	Frozen DMSO	1568-BA41/BA42-sec17	SRR5900068	Ex	BA41
20141208B_1C16_S88	SC_UCSD_3189	20141208B	Ex1	Ex1BA41	Smart+Poly	Small	Frozen DMSO	1568-BA41/BA42-sec17	SRR5900363	Ex	BA41
20141208B_1C17_S33	SC_UCSD_2495	20141208B	Ex1	Ex1BA41	Smart+Poly	Small	Frozen DMSO	1568-BA41/BA42-sec17	SRR5899669	Ex	BA41
20141208B_1C22_S10	SC_UCSD_3745	20141208B	Ex1	Ex1BA41	Smart+Poly	Small	Frozen DMSO	1568-BA41/BA42-sec17	SRR5900919	Ex	BA41
20141208B_1C25_S62	SC_UCSD_2561	20141208B	Ex1	Ex1BA41	Smart+Poly	Small	Frozen DMSO	1568-BA41/BA42-sec17	SRR5899735	Ex	BA41
20141208B_1C35_S55	SC_UCSD_3111	20141208B	Ex1	Ex1BA41	Smart+Poly	Small	Frozen DMSO	1568-BA41/BA42-sec17	SRR5900285	Ex	BA41
20141208B_1C37_S73	SC_UCSD_3204	20141208B	Ex1	Ex1BA41	Smart+Poly	Small	Frozen DMSO	1568-BA41/BA42-sec17	SRR5900378	Ex	BA41
20141208B_1C39_S74	SC_UCSD_2320	20141208B	Ex1	Ex1BA41	Smart+Poly	Small	Frozen DMSO	1568-BA41/BA42-sec17	SRR5899494	Ex	BA41
20141208B_1C53_S11	SC_UCSD_2762	20141208B	Ex1	Ex1BA41	Smart+Poly	Small	Frozen DMSO	1568-BA41/BA42-sec17	SRR5899936	Ex	BA41
20141208B_1C60_S68	SC_UCSD_2395	20141208B	Ex1	Ex1BA41	Smart+Poly	Small	Frozen DMSO	1568-BA41/BA42-sec17	SRR5899569	Ex	BA41
20141208B_1C64_S45	SC_UCSD_2307	20141208B	Ex1	Ex1BA41	Smart+Poly	Small	Frozen DMSO	1568-BA41/BA42-sec17	SRR5899481	Ex	BA41
20141208B_1C73_S32	SC_UCSD_3513	20141208B	Ex1	Ex1BA41	Smart+Poly	Small	Frozen DMSO	1568-BA41/BA42-sec17	SRR5900687	Ex	BA41
20141208B_1C76_S90	SC_UCSD_2676	20141208B	Ex1	Ex1BA41	Smart+Poly	Small	Frozen DMSO	1568-BA41/BA42-sec17	SRR5899850	Ex	BA41
20141208B_1C77_S35	SC_UCSD_3302	20141208B	Ex1	Ex1BA41	Smart+Poly	Small	Frozen DMSO	1568-BA41/BA42-sec17	SRR5900476	Ex	BA41
20141208B_1C79_S43	SC_UCSD_2384	20141208B	Ex1	Ex1BA41	Smart+Poly	Small	Frozen DMSO	1568-BA41/BA42-sec17	SRR5899558	Ex	BA41
20141208B_1C83_S46	SC_UCSD_2283	20141208B	Ex1	Ex1BA41	Smart+Poly	Small	Frozen DMSO	1568-BA41/BA42-sec17	SRR5899457	Ex	BA41
20141208B_1C87_S31	SC_UCSD_2369	20141208B	Ex1	Ex1BA41	Smart+Poly	Small	Frozen DMSO	1568-BA41/BA42-sec17	SRR5899543	Ex	BA41
20141208B_1C94_S24	SC_UCSD_3681	20141208B	Ex1	Ex1BA41	Smart+Poly	Small	Frozen DMSO	1568-BA41/BA42-sec17	SRR5900855	Ex	BA41
20141208B_1C95_S57	SC_UCSD_3615	20141208B	Ex1	Ex1BA41	Smart+Poly	Small	Frozen DMSO	1568-BA41/BA42-sec17	SRR5900789	Ex	BA41
20141210A_1C03_S92	SC_UCSD_3515	20141210A	Ex1	Ex1BA10	Smart+Poly	Small	Frozen DMSO	1568-BA10-sec1	SRR5900689	Ex	BA10
20141210A_1C13_S58	SC_UCSD_2635	20141210A	Ex1	Ex1BA10	Smart+Poly	Small	Frozen DMSO	1568-BA10-sec1	SRR5899809	Ex	BA10
20141210A_1C15_S21	SC_UCSD_3188	20141210A	Ex1	Ex1BA10	Smart+Poly	Small	Frozen DMSO	1568-BA10-sec1	SRR5900362	Ex	BA10
20141210A_1C21_S33	SC_UCSD_2869	20141210A	Ex1	Ex1BA10	Smart+Poly	Small	Frozen DMSO	1568-BA10-sec1	SRR5900043	Ex	BA10
20141210A_1C31_S57	SC_UCSD_2837	20141210A	Ex1	Ex1BA10	Smart+Poly	Small	Frozen DMSO	1568-BA10-sec1	SRR5900011	Ex	BA10
20141210A_1C32_S22	SC_UCSD_2335	20141210A	Ex1	Ex1BA10	Smart+Poly	Small	Frozen DMSO	1568-BA10-sec1	SRR5899509	Ex	BA10
20141210A_1C40_S48	SC_UCSD_1871	20141210A	Ex1	Ex1BA10	Smart+Poly	Small	Frozen DMSO	1568-BA10-sec1	SRR5899045	Ex	BA10
20141210A_1C45_S94	SC_UCSD_2940	20141210A	Ex1	Ex1BA10	Smart+Poly	Small	Frozen DMSO	1568-BA10-sec1	SRR5900114	Ex	BA10
20141210A_1C48_S25	SC_UCSD_3803	20141210A	Ex1	Ex1BA10	Smart+Poly	Small	Frozen DMSO	1568-BA10-sec1	SRR5900977	Ex	BA10
20141210A_1C52_S37	SC_UCSD_2976	20141210A	Ex1	Ex1BA10	Smart+Poly	Small	Frozen DMSO	1568-BA10-sec1	SRR5900150	Ex	BA10
20141210A_1C56_S59	SC_UCSD_2301	20141210A	Ex1	Ex1BA10	Smart+Poly	Small	Frozen DMSO	1568-BA10-sec1	SRR5899475	Ex	BA10
20141210A_1C79_S12	SC_UCSD_3423	20141210A	Ex1	Ex1BA10	Smart+Poly	Small	Frozen DMSO	1568-BA10-sec1	SRR5900597	Ex	BA10
20141210A_1C89_S38	SC_UCSD_2465	20141210A	Ex1	Ex1BA10	Smart+Poly	Small	Frozen DMSO	1568-BA10-sec1	SRR5899639	Ex	BA10
20141210B_1C03_S86	SC_UCSD_3264	20141210B	Ex1	Ex1BA10	Smart+Poly	Small	Frozen DMSO	1568-BA10-sec1	SRR5900438	Ex	BA10
20141210B_1C04_S90	SC_UCSD_2759	20141210B	Ex1	Ex1BA10	Smart+Poly	Small	Frozen DMSO	1568-BA10-sec1	SRR5899933	Ex	BA10
20141210B_1C12_S77	SC_UCSD_1968	20141210B	Ex1	Ex1BA10	Smart+Poly	Small	Frozen DMSO	1568-BA10-sec1	SRR5899142	Ex	BA10
20141210B_1C15_S3	SC_UCSD_3271	20141210B	Ex1	Ex1BA10	Smart+Poly	Small	Frozen DMSO	1568-BA10-sec1	SRR5900445	Ex	BA10
20141210B_1C27_S28	SC_UCSD_3568	20141210B	Ex1	Ex1BA10	Smart+Poly	Small	Frozen DMSO	1568-BA10-sec1	SRR5900742	Ex	BA10
20141210B_1C30_S7	SC_UCSD_3198	20141210B	Ex1	Ex1BA10	Smart+Poly	Small	Frozen DMSO	1568-BA10-sec1	SRR5900372	Ex	BA10
20141210B_1C32_S75	SC_UCSD_2449	20141210B	Ex1	Ex1BA10	Smart+Poly	Small	Frozen DMSO	1568-BA10-sec1	SRR5899623	Ex	BA10
20141210B_1C42_S31	SC_UCSD_2511	20141210B	Ex1	Ex1BA10	Smart+Poly	Small	Frozen DMSO	1568-BA10-sec1	SRR5899685	Ex	BA10
20141210B_1C44_S4	SC_UCSD_2722	20141210B	Ex1	Ex1BA10	Smart+Poly	Small	Frozen DMSO	1568-BA10-sec1	SRR5899896	Ex	BA10
20141210B_1C46_S89	SC_UCSD_3059	20141210B	Ex1	Ex1BA10	Smart+Poly	Small	Frozen DMSO	1568-BA10-sec1	SRR5900233	Ex	BA10
20141210B_1C69_S29	SC_UCSD_2538	20141210B	Ex1	Ex1BA10	Smart+Poly	Small	Frozen DMSO	1568-BA10-sec1	SRR5899712	Ex	BA10
20141210B_1C72_S80	SC_UCSD_3172	20141210B	Ex1	Ex1BA10	Smart+Poly	Small	Frozen DMSO	1568-BA10-sec1	SRR5900346	Ex	BA10
20141210B_1C78_S91	SC_UCSD_3314	20141210B	Ex1	Ex1BA10	Smart+Poly	Small	Frozen DMSO	1568-BA10-sec1	SRR5900488	Ex	BA10
20141210B_1C94_S21	SC_UCSD_2913	20141210B	Ex1	Ex1BA10	Smart+Poly	Small	Frozen DMSO	1568-BA10-sec1	SRR5900087	Ex	BA10
20141211A_1C11_S58	SC_UCSD_3736	20141211A	Ex1	Ex1BA10	Smart+Poly	Small	Frozen DMSO	1568-BA10-sec1	SRR5900910	Ex	BA10
20141211A_1C19_S82	SC_UCSD_2927	20141211A	Ex1	Ex1BA10	Smart+Poly	Small	Frozen DMSO	1568-BA10-sec1	SRR5900101	Ex	BA10
20141211A_1C24_S25	SC_UCSD_3273	20141211A	Ex1	Ex1BA10	Smart+Poly	Small	Frozen DMSO	1568-BA10-sec1	SRR5900447	Ex	BA10
20141211A_1C53_S38	SC_UCSD_3145	20141211A	Ex1	Ex1BA10	Smart+Poly	Small	Frozen DMSO	1568-BA10-sec1	SRR5900319	Ex	BA10
20141211A_1C57_S84	SC_UCSD_2620	20141211A	Ex1	Ex1BA10	Smart+Poly	Small	Frozen DMSO	1568-BA10-sec1	SRR5899794	Ex	BA10
20141211A_1C73_S1	SC_UCSD_1927	20141211A	Ex1	Ex1BA10	Smart+Poly	Small	Frozen DMSO	1568-BA10-sec1	SRR5899101	Ex	BA10
20141211A_1C74_S24	SC_UCSD_2591	20141211A	Ex1	Ex1BA10	Smart+Poly	Small	Frozen DMSO	1568-BA10-sec1	SRR5899765	Ex	BA10
20141211A_1C75_S59	SC_UCSD_2636	20141211A	Ex1	Ex1BA10	Smart+Poly	Small	Frozen DMSO	1568-BA10-sec1	SRR5899810	Ex	BA10
20141211A_1C94_S28	SC_UCSD_3547	20141211A	Ex1	Ex1BA10	Smart+Poly	Small	Frozen DMSO	1568-BA10-sec1	SRR5900721	Ex	BA10
20141211B_1C01_S73	SC_UCSD_2323	20141211B	Ex1	Ex1BA10	Smart+Poly	Small	Frozen DMSO	1568-BA10-sec1	SRR5899497	Ex	BA10
20141211B_1C26_S40	SC_UCSD_2366	20141211B	Ex1	Ex1BA10	Smart+Poly	Small	Frozen DMSO	1568-BA10-sec1	SRR5899540	Ex	BA10
20141211B_1C31_S61	SC_UCSD_2533	20141211B	Ex1	Ex1BA10	Smart+Poly	Small	Frozen DMSO	1568-BA10-sec1	SRR5899707	Ex	BA10
20141211B_1C33_S41	SC_UCSD_3447	20141211B	Ex1	Ex1BA10	Smart+Poly	Small	Frozen DMSO	1568-BA10-sec1	SRR5900621	Ex	BA10
20141211B_1C35_S44	SC_UCSD_3182	20141211B	Ex1	Ex1BA10	Smart+Poly	Small	Frozen DMSO	1568-BA10-sec1	SRR5900356	Ex	BA10
20141211B_1C46_S9	SC_UCSD_3140	20141211B	Ex1	Ex1BA10	Smart+Poly	Small	Frozen DMSO	1568-BA10-sec1	SRR5900314	Ex	BA10
20141211B_1C47_S55	SC_UCSD_2531	20141211B	Ex1	Ex1BA10	Smart+Poly	Small	Frozen DMSO	1568-BA10-sec1	SRR5899705	Ex	BA10
20141211B_1C57_S8	SC_UCSD_3869	20141211B	Ex1	Ex1BA10	Smart+Poly	Small	Frozen DMSO	1568-BA10-sec1	SRR5901043	Ex	BA10
20141211B_1C64_S56	SC_UCSD_3144	20141211B	Ex1	Ex1BA10	Smart+Poly	Small	Frozen DMSO	1568-BA10-sec1	SRR5900318	Ex	BA10
20141211B_1C80_S75	SC_UCSD_2640	20141211B	Ex1	Ex1BA10	Smart+Poly	Small	Frozen DMSO	1568-BA10-sec1	SRR5899814	Ex	BA10
20141211B_1C81_S19	SC_UCSD_2226	20141211B	Ex1	Ex1BA10	Smart+Poly	Small	Frozen DMSO	1568-BA10-sec1	SRR5899400	Ex	BA10
20141211B_1C84_S89	SC_UCSD_2312	20141211B	Ex1	Ex1BA10	Smart+Poly	Small	Frozen DMSO	1568-BA10-sec1	SRR5899486	Ex	BA10
20141211B_1C92_S86	SC_UCSD_3039	20141211B	Ex1	Ex1BA10	Smart+Poly	Small	Frozen DMSO	1568-BA10-sec1	SRR5900213	Ex	BA10
20141211B_1C93_S31	SC_UCSD_2643	20141211B	Ex1	Ex1BA10	Smart+Poly	Small	Frozen DMSO	1568-BA10-sec1	SRR5899817	Ex	BA10
20141211B_1C95_S46	SC_UCSD_3850	20141211B	Ex1	Ex1BA10	Smart+Poly	Small	Frozen DMSO	1568-BA10-sec1	SRR5901024	Ex	BA10
20150108_1C06_S63	SC_UCSD_3625	20150108	Ex1	Ex1BA10	Smart+Poly	Small	Frozen DMSO	1568-BA10-sec1	SRR5900799	Ex	BA10
20150108_1C07_S73	SC_UCSD_3448	20150108	Ex1	Ex1BA10	Smart+Poly	Small	Frozen DMSO	1568-BA10-sec1	SRR5900622	Ex	BA10
20150108_1C17_S76	SC_UCSD_2830	20150108	Ex1	Ex1BA10	Smart+Poly	Small	Frozen DMSO	1568-BA10-sec1	SRR5900004	Ex	BA10
20150108_1C23_S88	SC_UCSD_3244	20150108	Ex1	Ex1BA10	Smart+Poly	Small	Frozen DMSO	1568-BA10-sec1	SRR5900418	Ex	BA10
20150108_1C43_S25	SC_UCSD_2408	20150108	Ex1	Ex1BA10	Smart+Poly	Small	Frozen DMSO	1568-BA10-sec1	SRR5899582	Ex	BA10
20150108_1C55_S38	SC_UCSD_3471	20150108	Ex1	Ex1BA10	Smart+Poly	Small	Frozen DMSO	1568-BA10-sec1	SRR5900645	Ex	BA10
20150108_1C83_S42	SC_UCSD_3701	20150108	Ex1	Ex1BA10	Smart+Poly	Small	Frozen DMSO	1568-BA10-sec1	SRR5900875	Ex	BA10
20150108_1C84_S89	SC_UCSD_3752	20150108	Ex1	Ex1BA10	Smart+Poly	Small	Frozen DMSO	1568-BA10-sec1	SRR5900926	Ex	BA10
20150112A_1C05_S60	SC_UCSD_2988	20150112A	Ex1	Ex1BA17	Smart+Poly	Small	Frozen DMSO	1568-BA17-sec29	SRR5900162	Ex	BA17
20150112A_1C08_S91	SC_UCSD_3883	20150112A	Ex1	Ex1BA17	Smart+Poly	Small	Frozen DMSO	1568-BA17-sec29	SRR5901057	Ex	BA17
20150112A_1C13_S9	SC_UCSD_2310	20150112A	Ex1	Ex1BA17	Smart+Poly	Small	Frozen DMSO	1568-BA17-sec29	SRR5899484	Ex	BA17
20150112A_1C14_S8	SC_UCSD_2472	20150112A	Ex1	Ex1BA17	Smart+Poly	Small	Frozen DMSO	1568-BA17-sec29	SRR5899646	Ex	BA17
20150112A_1C35_S13	SC_UCSD_2556	20150112A	Ex1	Ex1BA17	Smart+Poly	Small	Frozen DMSO	1568-BA17-sec29	SRR5899730	Ex	BA17
20150112A_1C41_S25	SC_UCSD_3371	20150112A	Ex1	Ex1BA17	Smart+Poly	Small	Frozen DMSO	1568-BA17-sec29	SRR5900545	Ex	BA17
20150112A_1C45_S69	SC_UCSD_2295	20150112A	Ex1	Ex1BA17	Smart+Poly	Small	Frozen DMSO	1568-BA17-sec29	SRR5899469	Ex	BA17
20150112A_1C62_S58	SC_UCSD_1992	20150112A	Ex1	Ex1BA17	Smart+Poly	Small	Frozen DMSO	1568-BA17-sec29	SRR5899166	Ex	BA17
20150112A_1C76_S16	SC_UCSD_3177	20150112A	Ex1	Ex1BA17	Smart+Poly	Small	Frozen DMSO	1568-BA17-sec29	SRR5900351	Ex	BA17
20150112B_1C14_S41	SC_UCSD_2250	20150112B	Ex1	Ex1BA17	Smart+Poly	Small	Frozen DMSO	1568-BA17-sec29	SRR5899424	Ex	BA17
20150112B_1C18_S21	SC_UCSD_1894	20150112B	Ex1	Ex1BA17	Smart+Poly	Small	Frozen DMSO	1568-BA17-sec29	SRR5899068	Ex	BA17
20150112B_1C22_S46	SC_UCSD_1920	20150112B	Ex1	Ex1BA17	Smart+Poly	Small	Frozen DMSO	1568-BA17-sec29	SRR5899094	Ex	BA17
20150112B_1C30_S58	SC_UCSD_2853	20150112B	Ex1	Ex1BA17	Smart+Poly	Small	Frozen DMSO	1568-BA17-sec29	SRR5900027	Ex	BA17
20150112B_1C63_S32	SC_UCSD_3546	20150112B	Ex1	Ex1BA17	Smart+Poly	Small	Frozen DMSO	1568-BA17-sec29	SRR5900720	Ex	BA17
20150112B_1C66_S36	SC_UCSD_3310	20150112B	Ex1	Ex1BA17	Smart+Poly	Small	Frozen DMSO	1568-BA17-sec29	SRR5900484	Ex	BA17
20150112B_1C75_S7	SC_UCSD_3510	20150112B	Ex1	Ex1BA17	Smart+Poly	Small	Frozen DMSO	1568-BA17-sec29	SRR5900684	Ex	BA17
20150112B_1C89_S95	SC_UCSD_3776	20150112B	Ex1	Ex1BA17	Smart+Poly	Small	Frozen DMSO	1568-BA17-sec29	SRR5900950	Ex	BA17
20140123_1C12_S115	SC_UCSD_412	20140123	Ex2	Ex2BA8	Smart+	Medium	None	1568-BA8-sec7	SRR1764289	Ex	BA8
20140123_1C23_S140	SC_UCSD_326	20140123	Ex2	Ex2BA8	Smart+	Medium	None	1568-BA8-sec7	SRR1764211	Ex	BA8
20140123_1C34_S163	SC_UCSD_322	20140123	Ex2	Ex2BA8	Smart+	Medium	None	1568-BA8-sec7	SRR1764208	Ex	BA8
20140205_1C09_S13	SC_UCSD_481	20140205	Ex2	Ex2BA8	Smart	Medium	None	1568-BA8-sec9	SRR1764352	Ex	BA8
20140205_1C18_S31	SC_UCSD_514	20140205	Ex2	Ex2BA8	Smart	Medium	None	1568-BA8-sec9	SRR1764380	Ex	BA8
20140205_1C33_S63	SC_UCSD_358	20140205	Ex2	Ex2BA8	Smart	Medium	None	1568-BA8-sec9	SRR1764240	Ex	BA8
20140205_1C43_S85	SC_UCSD_3945	20140205	Ex2	Ex2BA8	Smart	Medium	None	1568-BA8-sec9	SRR5897266	Ex	BA8
20140213_1C29_S56	SC_UCSD_45	20140213	Ex2	Ex2BA8	Smart+	Medium	None	1568-BA8-sec7	SRR1763950	Ex	BA8
20140218_1C33	SC_UCSD_432	20140218	Ex2	Ex2BA8	Smart+	Medium	None	1568-BA8-sec7	SRR1764308	Ex	BA8
20140218_1C50	SC_UCSD_105	20140218	Ex2	Ex2BA8	Smart+	Medium	None	1568-BA8-sec7	SRR1764004	Ex	BA8
20140225_1C12	SC_UCSD_86	20140225	Ex2	Ex2BA8	Smart+	Medium	None	1568-BA8-sec9	SRR1763987	Ex	BA8
20140225_1C18	SC_UCSD_91	20140225	Ex2	Ex2BA8	Smart+	Medium	None	1568-BA8-sec9	SRR1763991	Ex	BA8
20140225_1C21	SC_UCSD_93	20140225	Ex2	Ex2BA8	Smart+	Medium	None	1568-BA8-sec9	SRR1763993	Ex	BA8
20140225_1C35	SC_UCSD_41	20140225	Ex2	Ex2BA8	Smart+	Medium	None	1568-BA8-sec9	SRR1763946	Ex	BA8
20140225_1C50	SC_UCSD_303	20140225	Ex2	Ex2BA8	Smart+	Medium	None	1568-BA8-sec9	SRR1764192	Ex	BA8
20140226_1C13	SC_UCSD_151	20140226	Ex2	Ex2BA8	Smart+	Medium	Frozen DMSO	1568-BA8-sec9	SRR1764048	Ex	BA8
20140226_1C18	SC_UCSD_330	20140226	Ex2	Ex2BA8	Smart+	Medium	Frozen DMSO	1568-BA8-sec9	SRR1764214	Ex	BA8
20140226_1C36	SC_UCSD_485	20140226	Ex2	Ex2BA8	Smart+	Medium	Frozen DMSO	1568-BA8-sec9	SRR1764356	Ex	BA8
20140226_1C39	SC_UCSD_506	20140226	Ex2	Ex2BA8	Smart+	Medium	Frozen DMSO	1568-BA8-sec9	SRR1764373	Ex	BA8
20140226_1C52	SC_UCSD_51	20140226	Ex2	Ex2BA8	Smart+	Medium	Frozen DMSO	1568-BA8-sec9	SRR1763953	Ex	BA8
20140227_1C93_S88	SC_UCSD_266	20140227	Ex2	Ex2BA8	Smart+	Medium	None	1568-BA8-sec9	SRR1764157	Ex	BA8
20140311_1C06_S7	SC_UCSD_1065	20140311	Ex2	Ex2BA8	Smart+	Medium	None	1568-BA8-sec9	SRR2137579	Ex	BA8
20140313_1C85_S78	SC_UCSD_633	20140313	Ex2	Ex2BA8	Smart+	Medium	None	1568-BA8-sec9	SRR2137147	Ex	BA8
20140317_1C42_S81	SC_UCSD_1076	20140317	Ex2	Ex2BA8	Smart+	Medium	Frozen DMSO	1568-BA8-sec9	SRR2137590	Ex	BA8
20140317_1C63_S30	SC_UCSD_1051	20140317	Ex2	Ex2BA8	Smart+	Medium	Frozen DMSO	1568-BA8-sec9	SRR2137565	Ex	BA8
20140326_1C47_S43	SC_UCSD_781	20140326	Ex2	Ex2BA8	Smart+	Medium	Frozen DMSO	1568-BA8-sec9	SRR2137295	Ex	BA8
20140331_1C22_S34	SC_UCSD_745	20140331	Ex2	Ex2BA8	Smart+	Small	Frozen DMSO	1568-BA8-sec9	SRR2137259	Ex	BA8
20140331_1C31_S36	SC_UCSD_593	20140331	Ex2	Ex2BA8	Smart+	Small	Frozen DMSO	1568-BA8-sec9	SRR2137107	Ex	BA8
20140331_1C69_S13	SC_UCSD_664	20140331	Ex2	Ex2BA8	Smart+	Small	Frozen DMSO	1568-BA8-sec9	SRR2137178	Ex	BA8
20140331_1C90_S18	SC_UCSD_813	20140331	Ex2	Ex2BA8	Smart+	Small	Frozen DMSO	1568-BA8-sec9	SRR2137327	Ex	BA8
20140402_1C16_S65	SC_UCSD_592	20140402	Ex2	Ex2BA8	Smart+Poly	Small	Frozen DMSO	1568-BA8-sec9	SRR2137106	Ex	BA8
20140402_1C17_S94	SC_UCSD_816	20140402	Ex2	Ex2BA8	Smart+Poly	Small	Frozen DMSO	1568-BA8-sec9	SRR2137330	Ex	BA8
20140415_1C79_S129	SC_UCSD_1182	20140415	Ex2	Ex2BA21	Smart+	Small	None	1568-BA21-sec15	SRR3230221	Ex	BA21
20140415_1C96_S147	SC_UCSD_1175	20140415	Ex2	Ex2BA21	Smart+	Small	None	1568-BA21-sec15	SRR3230214	Ex	BA21
20140501_1C21_S8	SC_UCSD_1196	20140501	Ex2	Ex2BA21	Smart+	Small	Frozen DMSO	1568-BA21-sec15	SRR3230235	Ex	BA21
20140501_1C30_S44	SC_UCSD_1222	20140501	Ex2	Ex2BA21	Smart+	Small	Frozen DMSO	1568-BA21-sec15	SRR3230261	Ex	BA21
20140702_1C22_S46	SC_UCSD_1055	20140702	Ex2	Ex2BA8	Smart+	Small	Frozen DMSO	1568-BA8-sec9	SRR2137569	Ex	BA8
20140702_1C69_S30	SC_UCSD_1092	20140702	Ex2	Ex2BA8	Smart+	Small	Frozen DMSO	1568-BA8-sec9	SRR2137606	Ex	BA8
20140708_1C53_S20	SC_UCSD_992	20140708	Ex2	Ex2BA8	Smart+Poly	Small	Frozen DMSO	1568-BA8-sec9	SRR2137506	Ex	BA8
20140715_1C10_S71	SC_UCSD_1296	20140715	Ex2	Ex2BA21	Smart+	Small	Frozen DMSO	1568-BA21-sec15	SRR3230335	Ex	BA21
20140716_1C15_S92	SC_UCSD_1343	20140716	Ex2	Ex2BA21	Smart+	Small	Frozen DMSO	1568-BA21-sec15	SRR3230382	Ex	BA21
20140722_1C25_S70	SC_UCSD_1368	20140722	Ex2	Ex2BA21	Smart+	Small	Frozen DMSO	1568-BA21-sec15	SRR3230407	Ex	BA21
20140723_1C79_S5	SC_UCSD_1412	20140723	Ex2	Ex2BA21	Smart+	Small	Frozen DMSO	1568-BA21-sec15	SRR3230451	Ex	BA21
20140724_1C07_S58	SC_UCSD_1458	20140724	Ex2	Ex2BA21	Smart+	Small	Frozen DMSO	1568-BA21-sec15	SRR3230497	Ex	BA21
20140724_1C24_S84	SC_UCSD_1435	20140724	Ex2	Ex2BA21	Smart+	Small	Frozen DMSO	1568-BA21-sec15	SRR3230474	Ex	BA21
20140724_1C25_S57	SC_UCSD_1475	20140724	Ex2	Ex2BA21	Smart+	Small	Frozen DMSO	1568-BA21-sec15	SRR3230514	Ex	BA21
20140724_1C28_S96	SC_UCSD_1455	20140724	Ex2	Ex2BA21	Smart+	Small	Frozen DMSO	1568-BA21-sec15	SRR3230494	Ex	BA21
20140724_1C47_S61	SC_UCSD_1436	20140724	Ex2	Ex2BA21	Smart+	Small	Frozen DMSO	1568-BA21-sec15	SRR3230475	Ex	BA21
20140815A_1C05_S31	SC_UCSD_3934	20140815A	Ex2	Ex2BA21	Smart+	Small	Frozen DMSO	1568-BA21-sec15	SRR5897255	Ex	BA21
[truncated: 1,056 more rows]

## Sheet: Table S2
SRA	Cell_type	Age_years	Donor_ID	Sex
SRR1974602	neurons	37	AB_S11	F
SRR1974603	neurons	37	AB_S11	F
SRR1974605	neurons	37	AB_S11	F
SRR1974607	neurons	37	AB_S11	F
SRR1974609	neurons	37	AB_S11	F
SRR1974611	neurons	37	AB_S11	F
SRR1974612	neurons	37	AB_S11	F
SRR1974613	neurons	37	AB_S11	F
SRR1974614	neurons	37	AB_S11	F
SRR1974615	neurons	37	AB_S11	F
SRR1974617	neurons	37	AB_S11	F
SRR1974618	neurons	37	AB_S11	F
SRR1974622	neurons	37	AB_S11	F
SRR1974623	neurons	37	AB_S11	F
SRR1974624	neurons	37	AB_S11	F
SRR1974626	neurons	37	AB_S11	F
SRR1974627	neurons	37	AB_S11	F
SRR1974628	neurons	37	AB_S11	F
SRR1974629	neurons	37	AB_S11	F
SRR1974630	neurons	37	AB_S11	F
SRR1974631	neurons	37	AB_S11	F
SRR1974632	neurons	37	AB_S11	F
SRR1974633	neurons	37	AB_S11	F
SRR1974634	neurons	37	AB_S11	F
SRR1974635	neurons	37	AB_S11	F
SRR1974636	neurons	37	AB_S11	F
SRR1974638	neurons	37	AB_S11	F
SRR1974639	neurons	37	AB_S11	F
SRR1974640	neurons	37	AB_S11	F
SRR1974642	neurons	37	AB_S11	F
SRR1974643	neurons	37	AB_S11	F
SRR1974645	neurons	37	AB_S11	F
SRR1974646	neurons	37	AB_S11	F
SRR1974648	neurons	37	AB_S11	F
SRR1974649	neurons	37	AB_S11	F
SRR1974650	neurons	37	AB_S11	F
SRR1974652	neurons	37	AB_S11	F
SRR1974654	neurons	37	AB_S11	F
SRR1974655	neurons	37	AB_S11	F
SRR1974656	neurons	37	AB_S11	F
SRR1974657	neurons	37	AB_S11	F
SRR1974658	neurons	37	AB_S11	F
SRR1974659	neurons	37	AB_S11	F
SRR1974660	neurons	37	AB_S11	F
SRR1974661	neurons	37	AB_S11	F
SRR1974662	neurons	37	AB_S11	F
SRR1974663	neurons	37	AB_S11	F
SRR1974681	neurons	50	AB_S4	M
SRR1974684	neurons	50	AB_S4	M
SRR1974686	neurons	50	AB_S4	M
SRR1974697	neurons	50	AB_S4	M
SRR1974704	neurons	50	AB_S4	M
SRR1974705	neurons	50	AB_S4	M
SRR1974706	neurons	50	AB_S4	M
SRR1974709	neurons	50	AB_S4	M
SRR1974712	neurons	50	AB_S4	M
SRR1974713	neurons	50	AB_S4	M
SRR1974714	neurons	50	AB_S4	M
SRR1974718	neurons	50	AB_S4	M
SRR1974724	neurons	50	AB_S4	M
SRR1974730	neurons	50	AB_S4	M
SRR1974735	neurons	50	AB_S4	M
SRR1974752	neurons	50	AB_S4	M
SRR1974756	neurons	63	AB_S5	M
SRR1974759	neurons	63	AB_S5	M
SRR1974762	neurons	63	AB_S5	M
SRR1974763	neurons	63	AB_S5	M
SRR1974767	neurons	63	AB_S5	M
SRR1974773	neurons	63	AB_S5	M
SRR1974775	neurons	63	AB_S5	M
SRR1974776	neurons	63	AB_S5	M
SRR1974777	neurons	63	AB_S5	M
SRR1974778	neurons	63	AB_S5	M
SRR1974779	neurons	63	AB_S5	M
SRR1974780	neurons	63	AB_S5	M
SRR1974782	neurons	63	AB_S5	M
SRR1974783	neurons	63	AB_S5	M
SRR1974785	neurons	63	AB_S5	M
SRR1974786	neurons	63	AB_S5	M
SRR1974787	neurons	63	AB_S5	M
SRR1974799	neurons	21	AB_S7	F
SRR1974801	neurons	21	AB_S7	F
SRR1974803	neurons	21	AB_S7	F
SRR1974806	neurons	21	AB_S7	F
SRR1974807	neurons	21	AB_S7	F
SRR1974808	neurons	21	AB_S7	F
SRR1974809	neurons	21	AB_S7	F
SRR1974813	neurons	21	AB_S7	F
SRR1974815	neurons	21	AB_S7	F
SRR1974817	neurons	21	AB_S7	F
SRR1974818	neurons	21	AB_S7	F
SRR1974819	neurons	21	AB_S7	F
SRR1974820	neurons	21	AB_S7	F
SRR1974821	neurons	21	AB_S7	F
SRR1974822	neurons	21	AB_S7	F
SRR1974824	neurons	21	AB_S7	F
SRR1974825	neurons	21	AB_S7	F
SRR1974828	neurons	21	AB_S7	F
SRR1974830	neurons	21	AB_S7	F
SRR1974832	neurons	21	AB_S7	F
SRR1974835	neurons	21	AB_S7	F
SRR1974838	neurons	21	AB_S7	F
SRR1974841	neurons	21	AB_S7	F
SRR1974842	neurons	21	AB_S7	F
SRR1974843	neurons	21	AB_S7	F
SRR1974844	neurons	21	AB_S7	F
SRR1974847	neurons	21	AB_S7	F
SRR1974848	neurons	21	AB_S7	F
SRR1974849	neurons	21	AB_S7	F
SRR1974853	neurons	21	AB_S7	F
SRR1974854	neurons	21	AB_S7	F

## Sheet: Table S3
Site_ID	chromosome	position	base_change	strand	strand_overlap	ENSMBL_GeneID	gene_name	gene_biotype	gene_description	REDIportal_context	RepeatMasker_ID	REDIportal_RepeatMasker_intersect	Genic_feature_summary	n_Cells_ed_Lake_etal	n_Cells_transcr_Lake_etal	mean_edPropn_Lake_etal	dEd_ASD_Tran_etal	dEd_Schizophrenia_Breen_etal	nCells_Darmanis_etal	nDonors_Darmanis_etal	REDIportal	REDI_All_Brain	REDI_All_Brain_gte3	REDI_BA9	REDI_BA9_gte3	RNAsnp_p_value
1_6851989	1	6851989	A_G	+	single_cogn_Plus	ENSG00000171735	CAMTA1	protein_coding	calmodulin binding transcription activator 1	ALU	AluSz6_2103	ALU	intronic	18	68	0.264706	FALSE	FALSE			1	1	0	0	0	0.0186
1_9820101	1	9820101	T_C	-	single_cogn_Minus	ENSG00000171603	CLSTN1	protein_coding	calsyntenin 1	uncatalog	AluJb_861	ALU_novel	intronic	11	198	0.0514455	FALSE	FALSE			0	0	0	0	0	0.9992
1_9820116	1	9820116	T_C	-	single_cogn_Minus	ENSG00000171603	CLSTN1	protein_coding	calsyntenin 1	REP	AluJb_861	REP	intronic	104	205	0.477102	FALSE	FALSE			1	1	1	0	0	0.8055
1_9820169	1	9820169	T_C	-	single_cogn_Minus	ENSG00000171603	CLSTN1	protein_coding	calsyntenin 1	REP	AluJb_861	REP	intronic	25	154	0.160606	FALSE	FALSE			1	1	1	1	0	0.5431
1_10381552	1	10381552	A_G	+	single_cogn_Plus	ENSG00000054523	KIF1B	protein_coding	kinesin family member 1B	uncatalog		NONREP_novel	three_prime_utr	109	1510	0.0365192	FALSE	FALSE			0	0	0	0	0	0.1149
1_14697249	1	14697249	A_G	+	single_cogn_Plus	ENSG00000189337	KAZN	protein_coding	kazrin, periplakin interacting protein	ALU	AluJo_1687	ALU	intronic	11	81	0.133624	FALSE	FALSE			1	1	1	1	1	0.5706
1_21137196	1	21137196	T_C	-	single_cogn_Minus	ENSG00000075151	EIF4G3	protein_coding	eukaryotic translation initiation factor 4 gamma 3	ALU	AluJr4_1773	ALU	intronic	20	152	0.127709	FALSE	FALSE			1	1	0	0	0	0.9362
1_21137201	1	21137201	T_C	-	single_cogn_Minus	ENSG00000075151	EIF4G3	protein_coding	eukaryotic translation initiation factor 4 gamma 3	ALU	AluJr4_1773	ALU	intronic	41	146	0.273066	FALSE	FALSE			1	1	0	0	0	0.9934
1_21137215	1	21137215	T_C	-	single_cogn_Minus	ENSG00000075151	EIF4G3	protein_coding	eukaryotic translation initiation factor 4 gamma 3	ALU	AluJr4_1773	ALU	intronic	40	111	0.342419	FALSE	FALSE			1	1	0	0	0	0.5667
1_21137255	1	21137255	T_C	-	single_cogn_Minus	ENSG00000075151	EIF4G3	protein_coding	eukaryotic translation initiation factor 4 gamma 3	ALU	AluJr4_1773	ALU	intronic	18	74	0.240852	FALSE	FALSE			1	1	1	0	0	0.8863
1_21137282	1	21137282	T_C	-	single_cogn_Minus	ENSG00000075151	EIF4G3	protein_coding	eukaryotic translation initiation factor 4 gamma 3	ALU	AluJr4_1773	ALU	intronic	27	75	0.36	FALSE	FALSE			1	1	1	0	0	0.5494
1_21137303	1	21137303	T_C	-	single_cogn_Minus	ENSG00000075151	EIF4G3	protein_coding	eukaryotic translation initiation factor 4 gamma 3	ALU	AluJr4_1773	ALU	intronic	24	89	0.253703	FALSE	FALSE			1	1	0	0	0	0.0911
1_21137350	1	21137350	T_C	-	single_cogn_Minus	ENSG00000075151	EIF4G3	protein_coding	eukaryotic translation initiation factor 4 gamma 3	ALU	AluJr4_1773	ALU	intronic	10	74	0.124249	FALSE	FALSE			1	1	0	0	0	0.9843
1_21137353	1	21137353	T_C	-	single_cogn_Minus	ENSG00000075151	EIF4G3	protein_coding	eukaryotic translation initiation factor 4 gamma 3	ALU	AluJr4_1773	ALU	intronic	14	73	0.191781	FALSE	FALSE			1	0	0	0	0	0.0261
1_21137404	1	21137404	T_C	-	single_cogn_Minus	ENSG00000075151	EIF4G3	protein_coding	eukaryotic translation initiation factor 4 gamma 3	ALU	AluJr4_1773	ALU	intronic	13	55	0.236364	FALSE	FALSE	1	1	1	1	0	0	0	0.9668
1_21137407	1	21137407	T_C	-	single_cogn_Minus	ENSG00000075151	EIF4G3	protein_coding	eukaryotic translation initiation factor 4 gamma 3	ALU	AluJr4_1773	ALU	intronic	24	55	0.436364	FALSE	FALSE			1	1	1	0	0	0.9938
1_21685382	1	21685382	T_C	-	single_cogn_Minus	ENSG00000090686	USP48	protein_coding	ubiquitin specific peptidase 48	ALU	AluSz_1997	ALU	intronic	122	223	0.523012	FALSE	FALSE			1	1	1	0	0	0.6633
1_21685389	1	21685389	T_C	-	single_cogn_Minus	ENSG00000090686	USP48	protein_coding	ubiquitin specific peptidase 48	ALU	AluSz_1997	ALU	intronic	33	227	0.14129	FALSE	FALSE			1	1	1	0	0	0.9283
1_21685390	1	21685390	T_C	-	single_cogn_Minus	ENSG00000090686	USP48	protein_coding	ubiquitin specific peptidase 48	ALU	AluSz_1997	ALU	intronic	171	225	0.751031	FALSE	FALSE	3	2	1	1	1	0	0	0.5718
1_21685426	1	21685426	T_C	-	single_cogn_Minus	ENSG00000090686	USP48	protein_coding	ubiquitin specific peptidase 48	ALU	AluSz_1997	ALU	intronic	26	162	0.150827	FALSE	FALSE			1	1	1	0	0	0.3776
1_21685430	1	21685430	T_C	-	single_cogn_Minus	ENSG00000090686	USP48	protein_coding	ubiquitin specific peptidase 48	ALU	AluSz_1997	ALU	intronic	27	133	0.183138	FALSE	FALSE			1	1	1	0	0	0.2164
1_21685436	1	21685436	T_C	-	single_cogn_Minus	ENSG00000090686	USP48	protein_coding	ubiquitin specific peptidase 48	ALU	AluSz_1997	ALU	intronic	18	113	0.15236	FALSE	FALSE			1	1	0	0	0	0.6554
1_21685440	1	21685440	T_C	-	single_cogn_Minus	ENSG00000090686	USP48	protein_coding	ubiquitin specific peptidase 48	ALU	AluSz_1997	ALU	intronic	118	165	0.535474	FALSE	FALSE	4	2	1	1	1	0	0	0.5521
1_25242402	1	25242402	T_C	-	single_cogn_Minus	ENSG00000117616	RSRP1	protein_coding	arginine and serine rich protein 1	uncatalog		NONREP_novel	three_prime_utr	14	975	0.0112302	FALSE	FALSE			0	0	0	0	0	0.3311
1_29078673	1	29078673	A_G	+	single_cogn_Plus	ENSG00000159023	EPB41	protein_coding	erythrocyte membrane protein band 4.1	ALU	AluJr_1699	ALU	intronic	11	54	0.203704	FALSE	FALSE			1	1	1	1	0	0.8155
1_30931697	1	30931697	T_C	-	single_cogn_Minus	ENSG00000134644	PUM1	protein_coding	pumilio RNA binding family member 1	uncatalog		NONREP_novel	three_prime_utr	58	791	0.0539593	FALSE	FALSE	7	5	0	0	0	0	0	0.9766
1_32643883	1	32643883	T_C	-	single_cogn_Minus	ENSG00000176261	ZBTB8OS	protein_coding	zinc finger and BTB domain containing 8 opposite strand	uncatalog	AluJb_1220	ALU_novel	intronic	30	343	0.0813112	FALSE	FALSE			0	0	0	0	0	0.0489
1_35176429	1	35176429	T_C	-	single_cogn_Minus	ENSG00000116560	SFPQ	protein_coding	splicing factor proline and glutamine rich	uncatalog		NONREP_novel	three_prime_utr	11	1656	0.00246988	FALSE	FALSE			0	0	0	0	0	0.7249
1_35634832	1	35634832	T_C	-	single_cogn_Minus	ENSG00000126067	PSMB2	protein_coding	proteasome subunit beta 2	ALU	AluJr4_1692	ALU	intronic	12	68	0.165546	FALSE	FALSE			1	0	0	0	0	0.7224
1_36441492	1	36441492	T_C	-	single_cogn_Minus	ENSG00000116885	OSCP1	protein_coding	organic solute carrier partner 1	uncatalog	AluY_2560	ALU_novel	intronic	17	2219	0.00420493	FALSE	FALSE			0	0	0	0	0	0.7439
1_36441505	1	36441505	T_C	-	single_cogn_Minus	ENSG00000116885	OSCP1	protein_coding	organic solute carrier partner 1	uncatalog	AluY_2560	ALU_novel	intronic	78	1082	0.0461825	FALSE	FALSE			0	0	0	0	0	0.6524
1_45610088	1	45610088	A_G	+	single_cogn_Plus	ENSG00000132780	NASP	protein_coding	nuclear autoantigenic sperm protein	ALU	AluSx4_2109	ALU	exonic	39	137	0.268819	FALSE	FALSE			1	1	1	1	1	0.9837
1_45610095	1	45610095	A_G	+	single_cogn_Plus	ENSG00000132780	NASP	protein_coding	nuclear autoantigenic sperm protein	ALU	AluSx4_2109	ALU	exonic	20	128	0.147331	FALSE	FALSE			1	1	1	1	1	0.4916
1_45610119	1	45610119	A_G	+	single_cogn_Plus	ENSG00000132780	NASP	protein_coding	nuclear autoantigenic sperm protein	ALU	AluSx4_2109	ALU	exonic	10	106	0.0876011	FALSE	FALSE			1	1	1	1	1	0.9597
1_45610140	1	45610140	A_G	+	single_cogn_Plus	ENSG00000132780	NASP	protein_coding	nuclear autoantigenic sperm protein	ALU	AluSx4_2109	ALU	exonic	44	306	0.128161	FALSE	FALSE	1	1	1	1	1	1	1	0.9011
1_45610149	1	45610149	A_G	+	single_cogn_Plus	ENSG00000132780	NASP	protein_coding	nuclear autoantigenic sperm protein	ALU	AluSx4_2109	ALU	exonic	41	383	0.093411	FALSE	FALSE			1	1	1	1	1	0.7092
1_45610154	1	45610154	A_G	+	single_cogn_Plus	ENSG00000132780	NASP	protein_coding	nuclear autoantigenic sperm protein	ALU	AluSx4_2109	ALU	exonic	11	391	0.0223237	FALSE	FALSE			1	1	1	1	1	0.8876
1_50714252	1	50714252	T_C	-	single_cogn_Minus	ENSG00000185104	FAF1	protein_coding	Fas associated factor 1	ALU	AluSx1_2014	ALU	intronic	14	21	0.666667	FALSE	FALSE			1	1	0	0	0	0.3837
1_66659781	1	66659781	A_G	+	single_cogn_Plus	ENSG00000118473	SGIP1	protein_coding	SH3 domain GRB2 like endophilin interacting protein 1	ALU	AluJr_1727	ALU	intronic	22	213	0.10161	FALSE	FALSE			1	1	1	1	1	0.4125
1_66659789	1	66659789	A_G	+	single_cogn_Plus	ENSG00000118473	SGIP1	protein_coding	SH3 domain GRB2 like endophilin interacting protein 1	ALU	AluJr_1727	ALU	intronic	40	250	0.151471	FALSE	FALSE			1	1	1	1	1	0.7769
1_66659799	1	66659799	A_G	+	single_cogn_Plus	ENSG00000118473	SGIP1	protein_coding	SH3 domain GRB2 like endophilin interacting protein 1	ALU	AluJr_1727	ALU	intronic	15	306	0.046474	FALSE	FALSE			1	1	1	1	1	0.8215
1_66659806	1	66659806	A_G	+	single_cogn_Plus	ENSG00000118473	SGIP1	protein_coding	SH3 domain GRB2 like endophilin interacting protein 1	ALU	AluJr_1727	ALU	intronic	11	339	0.0309735	FALSE	FALSE			1	1	1	1	1	0.3197
1_66659831	1	66659831	A_G	+	single_cogn_Plus	ENSG00000118473	SGIP1	protein_coding	SH3 domain GRB2 like endophilin interacting protein 1	ALU	AluJr_1727	ALU	intronic	34	463	0.0620449	FALSE	FALSE			1	1	1	1	1	0.9849
1_70237515	1	70237515	A_G	+	single_cogn_Plus	ENSG00000116754	SRSF11	protein_coding	serine and arginine rich splicing factor 11	uncatalog		NONREP_novel	exonic	68	1894	0.0168359	FALSE	FALSE			0	0	0	0	0	0.7421
1_70237517	1	70237517	A_G	+	single_cogn_Plus	ENSG00000116754	SRSF11	protein_coding	serine and arginine rich splicing factor 11	uncatalog		NONREP_novel	exonic	48	1892	0.0119091	FALSE	FALSE			0	0	0	0	0	0.7564
1_70237518	1	70237518	A_G	+	single_cogn_Plus	ENSG00000116754	SRSF11	protein_coding	serine and arginine rich splicing factor 11	uncatalog		NONREP_novel	exonic	21	1895	0.00423757	FALSE	FALSE			0	0	0	0	0	0.9486
1_70249999	1	70249999	A_G	+	single_cogn_Plus	ENSG00000116754	SRSF11	protein_coding	serine and arginine rich splicing factor 11	uncatalog		NONREP_novel	exonic	23	2165	0.00446702	FALSE	FALSE			0	0	0	0	0	0.6166
1_72088863	1	72088863	T_C	-	single_cogn_Minus	ENSG00000172260	NEGR1	protein_coding	neuronal growth regulator 1	ALU	AluSg4_823	ALU	intronic	57	359	0.1461	FALSE	FALSE	2	2	1	1	1	0	0	0.9551
1_72088864	1	72088864	T_C	-	single_cogn_Minus	ENSG00000172260	NEGR1	protein_coding	neuronal growth regulator 1	ALU	AluSg4_823	ALU	intronic	13	365	0.029412	FALSE	FALSE	1	1	1	1	1	0	0	0.011
1_72088868	1	72088868	T_C	-	single_cogn_Minus	ENSG00000172260	NEGR1	protein_coding	neuronal growth regulator 1	ALU	AluSg4_823	ALU	intronic	36	363	0.0944259	FALSE	FALSE	2	2	1	1	1	0	0	0.9916
1_72088871	1	72088871	T_C	-	single_cogn_Minus	ENSG00000172260	NEGR1	protein_coding	neuronal growth regulator 1	ALU	AluSg4_823	ALU	intronic	104	361	0.269077	FALSE	FALSE	5	3	1	1	1	1	0	0.8677
1_72088883	1	72088883	T_C	-	single_cogn_Minus	ENSG00000172260	NEGR1	protein_coding	neuronal growth regulator 1	ALU	AluSg4_823	ALU	intronic	11	341	0.0312805	FALSE	FALSE	2	2	1	1	0	1	0	0.6693
1_72088912	1	72088912	T_C	-	single_cogn_Minus	ENSG00000172260	NEGR1	protein_coding	neuronal growth regulator 1	ALU	AluSg4_823	ALU	intronic	45	289	0.146953	FALSE	FALSE	4	3	1	1	1	1	0	0.8503
1_72088948	1	72088948	T_C	-	single_cogn_Minus	ENSG00000172260	NEGR1	protein_coding	neuronal growth regulator 1	ALU	AluSg4_823	ALU	intronic	10	236	0.0396764	TRUE	FALSE	3	3	1	1	1	0	0	0.3721
1_72134776	1	72134776	T_C	-	single_cogn_Minus	ENSG00000172260	NEGR1	protein_coding	neuronal growth regulator 1	uncatalog	AluSp_2291	ALU_novel	intronic	10	127	0.0736578	FALSE	FALSE			0	0	0	0	0	0.9984
1_72134802	1	72134802	T_C	-	single_cogn_Minus	ENSG00000172260	NEGR1	protein_coding	neuronal growth regulator 1	ALU	AluSp_2291	ALU	intronic	42	140	0.27108	FALSE	FALSE	1	1	1	1	0	0	0	0.5209
1_72134830	1	72134830	T_C	-	single_cogn_Minus	ENSG00000172260	NEGR1	protein_coding	neuronal growth regulator 1	ALU	AluSp_2291	ALU	intronic	23	66	0.336195	FALSE	FALSE	1	1	1	1	0	0	0	0.9996
1_72252133	1	72252133	T_C	-	single_cogn_Minus	ENSG00000172260	NEGR1	protein_coding	neuronal growth regulator 1	ALU	AluSp_1373	ALU	intronic	14	200	0.0597143	FALSE	FALSE			1	1	1	0	0	0.6287
1_72252135	1	72252135	T_C	-	single_cogn_Minus	ENSG00000172260	NEGR1	protein_coding	neuronal growth regulator 1	ALU	AluSp_1373	ALU	intronic	25	203	0.114859	FALSE	FALSE			1	1	1	0	0	0.6726
1_72252182	1	72252182	T_C	-	single_cogn_Minus	ENSG00000172260	NEGR1	protein_coding	neuronal growth regulator 1	ALU	AluSp_1373	ALU	intronic	58	326	0.153988	FALSE	FALSE	2	2	1	1	1	0	0	0.601
1_72252185	1	72252185	T_C	-	single_cogn_Minus	ENSG00000172260	NEGR1	protein_coding	neuronal growth regulator 1	ALU	AluSp_1373	ALU	intronic	52	313	0.128445	FALSE	FALSE	3	3	1	1	1	0	0	0.6093
1_72252191	1	72252191	T_C	-	single_cogn_Minus	ENSG00000172260	NEGR1	protein_coding	neuronal growth regulator 1	uncatalog	AluSp_1373	ALU_novel	intronic	14	271	0.0260155	FALSE	FALSE			0	0	0	0	0	0.7537
1_72252193	1	72252193	T_C	-	single_cogn_Minus	ENSG00000172260	NEGR1	protein_coding	neuronal growth regulator 1	ALU	AluSp_1373	ALU	intronic	21	280	0.0523992	FALSE	FALSE			1	1	0	0	0	0.1248
1_72252201	1	72252201	T_C	-	single_cogn_Minus	ENSG00000172260	NEGR1	protein_coding	neuronal growth regulator 1	ALU	AluSp_1373	ALU	intronic	38	233	0.124216	FALSE	FALSE	4	4	1	1	1	0	0	0.2234
1_72252204	1	72252204	T_C	-	single_cogn_Minus	ENSG00000172260	NEGR1	protein_coding	neuronal growth regulator 1	ALU	AluSp_1373	ALU	intronic	15	214	0.0456977	FALSE	FALSE	5	4	1	1	1	0	0	0.2396
1_72252245	1	72252245	T_C	-	single_cogn_Minus	ENSG00000172260	NEGR1	protein_coding	neuronal growth regulator 1	uncatalog	AluSp_1373	ALU_novel	intronic	10	190	0.0451562	FALSE	FALSE	1	1	0	0	0	0	0	0.5547
1_72252247	1	72252247	T_C	-	single_cogn_Minus	ENSG00000172260	NEGR1	protein_coding	neuronal growth regulator 1	ALU	AluSp_1373	ALU	intronic	19	188	0.0974333	FALSE	FALSE			1	1	1	0	0	0.7569
1_72252251	1	72252251	T_C	-	single_cogn_Minus	ENSG00000172260	NEGR1	protein_coding	neuronal growth regulator 1	ALU	AluSp_1373	ALU	intronic	18	177	0.0939522	FALSE	FALSE			1	1	1	0	0	0.7869
1_72252257	1	72252257	T_C	-	single_cogn_Minus	ENSG00000172260	NEGR1	protein_coding	neuronal growth regulator 1	ALU	AluSp_1373	ALU	intronic	12	165	0.0664899	FALSE	FALSE			1	1	1	0	0	0.2726
1_77729314	1	77729314	T_C	-	single_cogn_Minus	ENSG00000077254	USP33	protein_coding	ubiquitin specific peptidase 33	REP	FLAM_C_765	REP	intronic	22	40	0.55	FALSE	FALSE			1	1	0	0	0	0.0306
1_77729315	1	77729315	T_C	-	single_cogn_Minus	ENSG00000077254	USP33	protein_coding	ubiquitin specific peptidase 33	REP	FLAM_C_765	REP	intronic	11	42	0.261905	FALSE	FALSE			1	0	0	0	0	0.7265
1_77747317	1	77747317	T_C	-	single_cogn_Minus	ENSG00000077254	USP33	protein_coding	ubiquitin specific peptidase 33	uncatalog	AluJr4_1713	ALU_novel	intronic	14	63	0.216931	FALSE	FALSE			0	0	0	0	0	0.9882
1_77747393	1	77747393	T_C	-	single_cogn_Minus	ENSG00000077254	USP33	protein_coding	ubiquitin specific peptidase 33	ALU	AluJr4_1713	ALU	intronic	19	46	0.395954	FALSE	FALSE			1	1	1	0	0	0.7344
1_77747399	1	77747399	T_C	-	single_cogn_Minus	ENSG00000077254	USP33	protein_coding	ubiquitin specific peptidase 33	ALU	AluJr4_1713	ALU	intronic	15	45	0.316132	FALSE	FALSE			1	1	0	0	0	0.0897
1_77747419	1	77747419	T_C	-	single_cogn_Minus	ENSG00000077254	USP33	protein_coding	ubiquitin specific peptidase 33	ALU	AluJr4_1713	ALU	intronic	10	42	0.238095	FALSE	FALSE			1	1	0	0	0	0.0209
1_77747453	1	77747453	T_C	-	single_cogn_Minus	ENSG00000077254	USP33	protein_coding	ubiquitin specific peptidase 33	ALU	AluJr4_1713	ALU	intronic	12	39	0.303419	FALSE	FALSE			1	1	0	0	0	0.065
1_77747456	1	77747456	T_C	-	single_cogn_Minus	ENSG00000077254	USP33	protein_coding	ubiquitin specific peptidase 33	ALU	AluJr4_1713	ALU	intronic	16	36	0.440476	FALSE	FALSE			1	1	1	0	0	0.8043
1_77747458	1	77747458	T_C	-	single_cogn_Minus	ENSG00000077254	USP33	protein_coding	ubiquitin specific peptidase 33	ALU	AluJr4_1713	ALU	intronic	10	36	0.27381	FALSE	FALSE			1	1	0	0	0	0.4535
1_83911335	1	83911335	T_C	-	single_cogn_Minus	ENSG00000137941	TTLL7	protein_coding	tubulin tyrosine ligase like 7	uncatalog		NONREP_novel	exonic	61	1038	0.0390833	FALSE	FALSE			0	0	0	0	0	0.0661
1_93334101	1	93334101	T_C	-	single_cogn_Minus	ENSG00000223745	CCDC18-AS1	processed_transcript	CCDC18 antisense RNA 1	ALU	AluJr_1779	ALU		12	409	0.026914	FALSE	FALSE			1	1	1	1	1	0.5104
1_93334115	1	93334115	T_C	-	single_cogn_Minus	ENSG00000223745	CCDC18-AS1	processed_transcript	CCDC18 antisense RNA 1	ALU	AluJr_1779	ALU		15	377	0.0397878	FALSE	FALSE	1	1	1	1	1	1	1	0.3405
1_93334136	1	93334136	T_C	-	single_cogn_Minus	ENSG00000223745	CCDC18-AS1	processed_transcript	CCDC18 antisense RNA 1	ALU	AluJr_1779	ALU		32	149	0.120301	FALSE	FALSE	4	2	1	1	1	1	1	0.3065
1_93334141	1	93334141	T_C	-	single_cogn_Minus	ENSG00000223745	CCDC18-AS1	processed_transcript	CCDC18 antisense RNA 1	ALU	AluJr_1779	ALU		10	133	0.075188	FALSE	FALSE	2	2	1	1	1	1	1	0.1881
1_97994318	1	97994318	T_C	-	single_cogn_Minus	ENSG00000225206	MIR137HG	lincRNA	MIR137 host gene	ALU	AluSx_1617	ALU		11	746	0.0110127	FALSE	FALSE	1	1	1	1	1	0	0	0.9387
1_97994325	1	97994325	T_C	-	single_cogn_Minus	ENSG00000225206	MIR137HG	lincRNA	MIR137 host gene	ALU	AluSx_1617	ALU		89	776	0.0861096	FALSE	FALSE	5	2	1	1	1	1	1	0.7433
1_97994345	1	97994345	T_C	-	single_cogn_Minus	ENSG00000225206	MIR137HG	lincRNA	MIR137 host gene	ALU	AluSx_1617	ALU		73	845	0.0629287	FALSE	FALSE			1	1	1	1	1	0.9994
1_97994352	1	97994352	T_C	-	single_cogn_Minus	ENSG00000225206	MIR137HG	lincRNA	MIR137 host gene	uncatalog	AluSx_1617	ALU_novel		13	811	0.0142377	FALSE	FALSE			0	0	0	0	0	0.9986
1_97994354	1	97994354	T_C	-	single_cogn_Minus	ENSG00000225206	MIR137HG	lincRNA	MIR137 host gene	ALU	AluSx_1617	ALU		18	797	0.0175343	FALSE	FALSE	1	1	1	1	1	1	0	0.9706
1_109275720	1	109275720	A_G	+	single_cogn_Plus	ENSG00000143126	CELSR2	protein_coding	cadherin EGF LAG seven-pass G-type receptor 2	uncatalog		NONREP_novel	three_prime_utr	29	1359	0.0111375	FALSE	FALSE			0	0	0	0	0	0.6212
1_117088433	1	117088433	A_G	+	single_cogn_Plus	ENSG00000116830	TTF2	protein_coding	transcription termination factor 2	ALU	AluY_2509	ALU	intronic	137	2537	0.0278379	FALSE	FALSE			1	1	1	0	0	0.6214
1_117088439	1	117088439	A_G	+	single_cogn_Plus	ENSG00000116830	TTF2	protein_coding	transcription termination factor 2	ALU	AluY_2509	ALU	intronic	105	2434	0.0230564	FALSE	FALSE			1	1	1	0	0	0.7627
1_117088443	1	117088443	A_G	+	single_cogn_Plus	ENSG00000116830	TTF2	protein_coding	transcription termination factor 2	ALU	AluY_2509	ALU	intronic	237	2301	0.0556455	FALSE	FALSE			1	1	1	1	1	0.2936
1_117088446	1	117088446	A_G	+	single_cogn_Plus	ENSG00000116830	TTF2	protein_coding	transcription termination factor 2	uncatalog	AluY_2509	ALU_novel	intronic	30	2183	0.0073401	FALSE	FALSE			0	0	0	0	0	0.9018
1_150622186	1	150622186	T_C	-	single_cogn_Minus	ENSG00000143420	ENSA	protein_coding	endosulfine alpha	uncatalog		NONREP_novel	three_prime_utr	20	1086	0.00814821	FALSE	FALSE			0	0	0	0	0	0.9506
1_150622187	1	150622187	T_C	-	single_cogn_Minus	ENSG00000143420	ENSA	protein_coding	endosulfine alpha	uncatalog		NONREP_novel	three_prime_utr	15	1088	0.00712789	FALSE	FALSE			0	0	0	0	0	0.9961
1_154206832	1	154206832	T_C	-	single_cogn_Minus	ENSG00000143612	C1orf43	protein_coding	chromosome 1 open reading frame 43	uncatalog		NONREP_novel	three_prime_utr	12	244	0.0458271	FALSE	FALSE			0	0	0	0	0	0.1093
1_155727344	1	155727344	A_G	+	single_cogn_Plus	ENSG00000132676	DAP3	protein_coding	death associated protein 3	NONREP		NONREP	intronic	42	122	0.200495	FALSE	FALSE	8	2	1	1	1	1	1	0.496
1_155727395	1	155727395	A_G	+	single_cogn_Plus	ENSG00000132676	DAP3	protein_coding	death associated protein 3	ALU	AluJr4_940	ALU	intronic	96	184	0.331343	FALSE	FALSE	14	3	1	1	1	1	1	0.6856
1_155727409	1	155727409	A_G	+	single_cogn_Plus	ENSG00000132676	DAP3	protein_coding	death associated protein 3	ALU	AluJr4_940	ALU	intronic	104	207	0.319315	FALSE	FALSE	12	3	1	1	1	1	1	0.1356
1_155727411	1	155727411	A_G	+	single_cogn_Plus	ENSG00000132676	DAP3	protein_coding	death associated protein 3	ALU	AluJr4_940	ALU	intronic	42	180	0.121614	FALSE	FALSE	8	2	1	1	1	1	1	0.1171
1_155727425	1	155727425	A_G	+	single_cogn_Plus	ENSG00000132676	DAP3	protein_coding	death associated protein 3	ALU	AluJr4_940	ALU	intronic	11	172	0.0583818	FALSE	FALSE	1	1	1	1	1	1	1	0.623
1_155727456	1	155727456	A_G	+	single_cogn_Plus	ENSG00000132676	DAP3	protein_coding	death associated protein 3	ALU	AluJr4_940	ALU	intronic	50	125	0.232632	FALSE	FALSE	4	1	1	1	1	1	1	0.6112
1_179974884	1	179974884	A_G	+	single_cogn_Plus	ENSG00000135837	CEP350	protein_coding	centrosomal protein 350	ALU	AluJr4_1863	ALU	intronic	10	34	0.294118	FALSE	FALSE	4	3	1	1	1	0	0	0.1803
1_201985099	1	201985099	A_G	+	single_cogn_Plus	ENSG00000176393	RNPEP	protein_coding	arginyl aminopeptidase	ALU	AluSx_2168	ALU	intronic	10	17	0.588235	FALSE	FALSE	1	1	1	1	0	0	0	0.0508
1_202787114	1	202787114	T_C	-	single_cogn_Minus	ENSG00000117139	KDM5B	protein_coding	lysine demethylase 5B	ALU	AluJr_1696	ALU	intronic	15	54	0.277778	FALSE	FALSE			1	1	0	0	0	0.3889
1_204519852	1	204519852	A_G	+	single_cogn_Plus	ENSG00000198625	MDM4	protein_coding	MDM4, p53 regulator	uncatalog		NONREP_novel	intronic	19	101	0.185175	FALSE	FALSE			0	0	0	0	0	0.6254
1_204638508	1	204638508	T_C	-	single_cogn_Minus	ENSG00000170382	LRRN2	protein_coding	leucine rich repeat neuronal 2	uncatalog	AluSg7_2245	ALU_novel	intronic	23	200	0.106449	FALSE	FALSE			0	0	0	0	0	0.2886
1_204638509	1	204638509	T_C	-	single_cogn_Minus	ENSG00000170382	LRRN2	protein_coding	leucine rich repeat neuronal 2	ALU	AluSg7_2245	ALU	intronic	30	193	0.15396	FALSE	FALSE			1	1	1	1	0	0.7278
1_204638510	1	204638510	T_C	-	single_cogn_Minus	ENSG00000170382	LRRN2	protein_coding	leucine rich repeat neuronal 2	ALU	AluSg7_2245	ALU	intronic	80	181	0.440042	FALSE	FALSE	2	2	1	1	1	1	1	0.8237
1_204670060	1	204670060	T_C	-	single_cogn_Minus	ENSG00000170382	LRRN2	protein_coding	leucine rich repeat neuronal 2	uncatalog		NONREP_novel	intronic	13	104	0.121652	FALSE	FALSE	1	1	0	0	0	0	0	0.7439
1_205740088	1	205740088	T_C	-	single_cogn_Minus	ENSG00000069275	NUCKS1	protein_coding	nuclear casein kinase and cyclin dependent kinase substrate 1	ALU	AluSz_1983	ALU	intronic	10	160	0.0560526	FALSE	FALSE	3	3	1	1	1	0	0	0.965
1_205740099	1	205740099	T_C	-	single_cogn_Minus	ENSG00000069275	NUCKS1	protein_coding	nuclear casein kinase and cyclin dependent kinase substrate 1	ALU	AluSz_1983	ALU	intronic	10	87	0.106985	FALSE	FALSE	4	3	1	1	1	0	0	0.3951
1_218314930	1	218314930	A_G	+	single_cogn_Plus	ENSG00000067533	RRP15	protein_coding	ribosomal RNA processing 15 homolog	ALU	AluSc_2348	ALU	intronic	17	43	0.395349	FALSE	FALSE	1	1	1	0	0	0	0	0.926
1_223224937	1	223224937	T_C	-	single_cogn_Minus	ENSG00000143502	SUSD4	protein_coding	sushi domain containing 4	ALU	AluSx_2208	ALU	intronic	21	55	0.380234	FALSE	FALSE			1	1	1	1	0	0.0126
1_228494796	1	228494796	A_G	+	single_cogn_Plus	ENSG00000168159	RNF187	protein_coding	ring finger protein 187	uncatalog		NONREP_novel	three_prime_utr	52	725	0.0381555	FALSE	FALSE			0	0	0	0	0	0.6205
1_228494828	1	228494828	A_G	+	single_cogn_Plus	ENSG00000168159	RNF187	protein_coding	ring finger protein 187	uncatalog		NONREP_novel	three_prime_utr	15	892	0.0102677	FALSE	FALSE			0	0	0	0	0	0.8261
1_237374264	1	237374264	A_G	+	single_cogn_Plus	ENSG00000198626	RYR2	protein_coding	ryanodine receptor 2	REP	FLAM_C_784	REP	intronic	71	373	0.168934	FALSE	FALSE			1	1	1	0	0	0.4179
1_237374267	1	237374267	A_G	+	single_cogn_Plus	ENSG00000198626	RYR2	protein_coding	ryanodine receptor 2	uncatalog	FLAM_C_784	REP_novel	intronic	18	390	0.0419815	FALSE	FALSE			0	0	0	0	0	0.1865
1_237374284	1	237374284	A_G	+	single_cogn_Plus	ENSG00000198626	RYR2	protein_coding	ryanodine receptor 2	uncatalog	FLAM_C_784	REP_novel	intronic	32	384	0.0686653	FALSE	FALSE	1	1	0	0	0	0	0	0.6753
1_237374311	1	237374311	A_G	+	single_cogn_Plus	ENSG00000198626	RYR2	protein_coding	ryanodine receptor 2	REP	FLAM_C_784	REP	intronic	84	456	0.168085	FALSE	FALSE	1	1	1	1	0	0	0	0.7641
1_237374339	1	237374339	A_G	+	single_cogn_Plus	ENSG00000198626	RYR2	protein_coding	ryanodine receptor 2	REP	FLAM_C_784	REP	intronic	70	395	0.156801	FALSE	FALSE	2	2	1	1	0	0	0	0.8222
1_237402813	1	237402813	A_G	+	single_cogn_Plus	ENSG00000198626	RYR2	protein_coding	ryanodine receptor 2	uncatalog	AluJb_651	ALU_novel	intronic	19	59	0.312907	FALSE	FALSE	1	1	0	0	0	0	0	0.7967
1_237402835	1	237402835	A_G	+	single_cogn_Plus	ENSG00000198626	RYR2	protein_coding	ryanodine receptor 2	uncatalog	AluJb_651	ALU_novel	intronic	24	81	0.291005	FALSE	FALSE	1	1	0	0	0	0	0	0.6441
1_240146122	1	240146122	A_G	+	single_cogn_Plus	ENSG00000155816	FMN2	protein_coding	formin 2	ALU	AluSc8_2305	ALU	intronic	30	106	0.281132	FALSE	FALSE	3	3	1	1	0	0	0	0.8333
1_240146128	1	240146128	A_G	+	single_cogn_Plus	ENSG00000155816	FMN2	protein_coding	formin 2	ALU	AluSc8_2305	ALU	intronic	43	103	0.415858	FALSE	FALSE	2	2	1	1	0	0	0	0.2071
1_241235693	1	241235693	T_C	-	single_cogn_Minus	ENSG00000182901	RGS7	protein_coding	regulator of G-protein signaling 7	uncatalog		NONREP_novel	intronic	12	1206	0.00381617	FALSE	FALSE			0	0	0	0	0	0.8834
1_241235729	1	241235729	T_C	-	single_cogn_Minus	ENSG00000182901	RGS7	protein_coding	regulator of G-protein signaling 7	uncatalog		NONREP_novel	intronic	15	1233	0.00801329	FALSE	FALSE	1	1	0	0	0	0	0	0.529
1_241235733	1	241235733	T_C	-	single_cogn_Minus	ENSG00000182901	RGS7	protein_coding	regulator of G-protein signaling 7	uncatalog		NONREP_novel	intronic	16	1224	0.00799311	FALSE	FALSE			0	0	0	0	0	0.6957
1_243266700	1	243266700	A_G	+	single_cogn_Plus	ENSG00000054282	SDCCAG8	protein_coding	serologically defined colon cancer antigen 8	ALU	AluSp_1346	ALU	intronic	17	48	0.345833	FALSE	FALSE			1	1	0	0	0	0.7948
1_243266701	1	243266701	A_G	+	single_cogn_Plus	ENSG00000054282	SDCCAG8	protein_coding	serologically defined colon cancer antigen 8	ALU	AluSp_1346	ALU	intronic	16	48	0.323864	FALSE	FALSE			1	1	0	0	0	0.7871
1_243266706	1	243266706	A_G	+	single_cogn_Plus	ENSG00000054282	SDCCAG8	protein_coding	serologically defined colon cancer antigen 8	ALU	AluSp_1346	ALU	intronic	21	53	0.381422	FALSE	FALSE	1	1	1	1	1	0	0	0.7965
1_243266822	1	243266822	A_G	+	single_cogn_Plus	ENSG00000054282	SDCCAG8	protein_coding	serologically defined colon cancer antigen 8	ALU	AluSp_1346	ALU	intronic	14	79	0.167722	FALSE	FALSE			1	1	0	0	0	0.9369
1_243266823	1	243266823	A_G	+	single_cogn_Plus	ENSG00000054282	SDCCAG8	protein_coding	serologically defined colon cancer antigen 8	ALU	AluSp_1346	ALU	intronic	15	81	0.176207	FALSE	FALSE			1	1	0	0	0	0.6951
1_243266828	1	243266828	A_G	+	single_cogn_Plus	ENSG00000054282	SDCCAG8	protein_coding	serologically defined colon cancer antigen 8	ALU	AluSp_1346	ALU	intronic	16	83	0.184337	FALSE	FALSE			1	1	1	0	0	0.9928
1_243266875	1	243266875	A_G	+	single_cogn_Plus	ENSG00000054282	SDCCAG8	protein_coding	serologically defined colon cancer antigen 8	ALU	AluSp_1346	ALU	intronic	25	92	0.268979	FALSE	FALSE			1	1	1	0	0	0.9774
1_243567156	1	243567156	T_C	-	single_cogn_Minus	ENSG00000117020	AKT3	protein_coding	AKT serine/threonine kinase 3	ALU	AluJb_1867	ALU	intronic	77	134	0.559431	FALSE	FALSE	4	2	1	1	1	1	0	0.6082
1_243567157	1	243567157	T_C	-	single_cogn_Minus	ENSG00000117020	AKT3	protein_coding	AKT serine/threonine kinase 3	ALU	AluJb_1867	ALU	intronic	10	137	0.0639647	FALSE	FALSE	1	1	1	1	1	1	0	0.9617
1_243567195	1	243567195	T_C	-	single_cogn_Minus	ENSG00000117020	AKT3	protein_coding	AKT serine/threonine kinase 3	ALU	AluJb_1867	ALU	intronic	23	106	0.207547	FALSE	FALSE	1	1	1	1	1	1	0	0.6783
1_243567198	1	243567198	T_C	-	single_cogn_Minus	ENSG00000117020	AKT3	protein_coding	AKT serine/threonine kinase 3	ALU	AluJb_1867	ALU	intronic	36	96	0.367207	FALSE	FALSE	4	3	1	1	1	1	0	0.2545
1_243567199	1	243567199	T_C	-	single_cogn_Minus	ENSG00000117020	AKT3	protein_coding	AKT serine/threonine kinase 3	ALU	AluJb_1867	ALU	intronic	22	94	0.223646	FALSE	FALSE	3	2	1	1	1	1	0	0.9731
1_243815643	1	243815643	T_C	-	single_cogn_Minus	ENSG00000117020	AKT3	protein_coding	AKT serine/threonine kinase 3	ALU	AluJb_1617	ALU	intronic	10	234	0.042735	FALSE	FALSE			1	1	0	0	0	0.1094
11_1585945	11	1585945	A_G	+	single_cogn_Plus	ENSG00000233930	KRTAP5-AS1	antisense_RNA	KRTAP5-1/KRTAP5-2 antisense RNA 1	uncatalog	AluSz6_2222	ALU_novel		24	208	0.106941	FALSE	FALSE			0	0	0	0	0	0.5652
11_1585947	11	1585947	A_G	+	single_cogn_Plus	ENSG00000233930	KRTAP5-AS1	antisense_RNA	KRTAP5-1/KRTAP5-2 antisense RNA 1	uncatalog	AluSz6_2222	ALU_novel		10	212	0.0404673	FALSE	FALSE			0	0	0	0	0	0.5679
11_17101771	11	17101771	T_C	-	single_cogn_Minus	ENSG00000011405	PIK3C2A	protein_coding	phosphatidylinositol-4-phosphate 3-kinase catalytic subunit type 2 alpha	uncatalog	AluY_2677	ALU_novel	intronic	78	337	0.22352	FALSE	FALSE			0	0	0	0	0	0.866
11_17101772	11	17101772	T_C	-	single_cogn_Minus	ENSG00000011405	PIK3C2A	protein_coding	phosphatidylinositol-4-phosphate 3-kinase catalytic subunit type 2 alpha	uncatalog	AluY_2677	ALU_novel	intronic	98	316	0.294941	FALSE	FALSE			0	0	0	0	0	0.9648
11_17101773	11	17101773	T_C	-	single_cogn_Minus	ENSG00000011405	PIK3C2A	protein_coding	phosphatidylinositol-4-phosphate 3-kinase catalytic subunit type 2 alpha	uncatalog	AluY_2677	ALU_novel	intronic	56	316	0.166379	FALSE	FALSE			0	0	0	0	0	0.9751
11_17101774	11	17101774	T_C	-	single_cogn_Minus	ENSG00000011405	PIK3C2A	protein_coding	phosphatidylinositol-4-phosphate 3-kinase catalytic subunit type 2 alpha	uncatalog	AluY_2677	ALU_novel	intronic	56	293	0.17836	FALSE	FALSE			0	0	0	0	0	0.7972
11_17101775	11	17101775	T_C	-	single_cogn_Minus	ENSG00000011405	PIK3C2A	protein_coding	phosphatidylinositol-4-phosphate 3-kinase catalytic subunit type 2 alpha	uncatalog	AluY_2677	ALU_novel	intronic	44	286	0.144755	FALSE	FALSE			0	0	0	0	0	0.9497
11_17101778	11	17101778	T_C	-	single_cogn_Minus	ENSG00000011405	PIK3C2A	protein_coding	phosphatidylinositol-4-phosphate 3-kinase catalytic subunit type 2 alpha	uncatalog	AluY_2677	ALU_novel	intronic	59	256	0.229818	FALSE	FALSE			0	0	0	0	0	0.8679
11_17101780	11	17101780	T_C	-	single_cogn_Minus	ENSG00000011405	PIK3C2A	protein_coding	phosphatidylinositol-4-phosphate 3-kinase catalytic subunit type 2 alpha	uncatalog	AluY_2677	ALU_novel	intronic	16	231	0.0654504	FALSE	FALSE			0	0	0	0	0	0.6923
11_17101781	11	17101781	T_C	-	single_cogn_Minus	ENSG00000011405	PIK3C2A	protein_coding	phosphatidylinositol-4-phosphate 3-kinase catalytic subunit type 2 alpha	uncatalog	AluY_2677	ALU_novel	intronic	11	215	0.0511628	FALSE	FALSE			0	0	0	0	0	0.9325
11_45649025	11	45649025	T_C	-	single_cogn_Minus	ENSG00000175264	CHST1	protein_coding	carbohydrate sulfotransferase 1	uncatalog		NONREP_novel	three_prime_utr	14	705	0.0106272	FALSE	FALSE			0	0	0	0	0	0.1384
11_45649026	11	45649026	T_C	-	single_cogn_Minus	ENSG00000175264	CHST1	protein_coding	carbohydrate sulfotransferase 1	uncatalog		NONREP_novel	three_prime_utr	14	700	0.0109325	FALSE	FALSE			0	0	0	0	0	0.0519
11_47162077	11	47162077	A_G	+	single_cogn_Plus	ENSG00000149179	C11orf49	protein_coding	chromosome 11 open reading frame 49	uncatalog		NONREP_novel	three_prime_utr	27	242	0.0906117	FALSE	FALSE			0	0	0	0	0	0.8427
11_47162080	11	47162080	A_G	+	single_cogn_Plus	ENSG00000149179	C11orf49	protein_coding	chromosome 11 open reading frame 49	uncatalog		NONREP_novel	three_prime_utr	27	261	0.0662251	FALSE	FALSE			0	0	0	0	0	0.0664
11_47278179	11	47278179	A_G	+	single_cogn_Plus	ENSG00000110514	MADD	protein_coding	MAP kinase activating death domain	uncatalog		NONREP_novel	exonic	19	258	0.0698551	FALSE	FALSE			0	0	0	0	0	0.9263
11_47278180	11	47278180	A_G	+	single_cogn_Plus	ENSG00000110514	MADD	protein_coding	MAP kinase activating death domain	uncatalog		NONREP_novel	exonic	14	259	0.0453882	FALSE	FALSE			0	0	0	0	0	0.9544
11_61867266	11	61867266	A_G	+	single_cogn_Plus	ENSG00000134824	FADS2	protein_coding	fatty acid desaturase 2	uncatalog		NONREP_novel	three_prime_utr	14	191	0.0522372	FALSE	FALSE			0	0	0	0	0	0.7972
11_65499373	11	65499373	A_G	+	single_cogn_Plus	ENSG00000251562	MALAT1	lincRNA	metastasis associated lung adenocarcinoma transcript 1 (non-protein coding)	uncatalog		NONREP_novel		32	2996	0.00326885	FALSE	FALSE			0	0	0	0	0	0.9497
11_65499686	11	65499686	A_G	+	single_cogn_Plus	ENSG00000251562	MALAT1	lincRNA	metastasis associated lung adenocarcinoma transcript 1 (non-protein coding)	uncatalog		NONREP_novel		20	3046	0.000926512	FALSE	FALSE			0	0	0	0	0	0.9943
11_65499687	11	65499687	A_G	+	single_cogn_Plus	ENSG00000251562	MALAT1	lincRNA	metastasis associated lung adenocarcinoma transcript 1 (non-protein coding)	uncatalog		NONREP_novel		13	3046	0.000404215	FALSE	FALSE			0	0	0	0	0	0.9507
11_65499917	11	65499917	A_G	+	single_cogn_Plus	ENSG00000251562	MALAT1	lincRNA	metastasis associated lung adenocarcinoma transcript 1 (non-protein coding)	uncatalog		NONREP_novel		15	3043	0.000630729	FALSE	FALSE			0	0	0	0	0	0.1506
11_65499986	11	65499986	A_G	+	single_cogn_Plus	ENSG00000251562	MALAT1	lincRNA	metastasis associated lung adenocarcinoma transcript 1 (non-protein coding)	uncatalog		NONREP_novel		10	2729	0.00134631	FALSE	FALSE			0	0	0	0	0	0.8804
11_65500369	11	65500369	A_G	+	single_cogn_Plus	ENSG00000251562	MALAT1	lincRNA	metastasis associated lung adenocarcinoma transcript 1 (non-protein coding)	uncatalog		NONREP_novel		11	2423	0.00160327	FALSE	FALSE			0	0	0	0	0	0.7268
11_65500470	11	65500470	A_G	+	single_cogn_Plus	ENSG00000251562	MALAT1	lincRNA	metastasis associated lung adenocarcinoma transcript 1 (non-protein coding)	uncatalog		NONREP_novel		11	2783	0.000958694	FALSE	FALSE			0	0	0	0	0	0.2663
11_65500571	11	65500571	A_G	+	single_cogn_Plus	ENSG00000251562	MALAT1	lincRNA	metastasis associated lung adenocarcinoma transcript 1 (non-protein coding)	uncatalog		NONREP_novel		15	2673	0.00126994	FALSE	FALSE			0	0	0	0	0	0.9784
11_65500861	11	65500861	A_G	+	single_cogn_Plus	ENSG00000251562	MALAT1	lincRNA	metastasis associated lung adenocarcinoma transcript 1 (non-protein coding)	uncatalog		NONREP_novel		16	2260	0.0027764	FALSE	FALSE			0	0	0	0	0	0.7613
11_65500885	11	65500885	A_G	+	single_cogn_Plus	ENSG00000251562	MALAT1	lincRNA	metastasis associated lung adenocarcinoma transcript 1 (non-protein coding)	uncatalog		NONREP_novel		40	2021	0.00993288	FALSE	FALSE			0	0	0	0	0	0.9834
11_65500931	11	65500931	A_G	+	single_cogn_Plus	ENSG00000251562	MALAT1	lincRNA	metastasis associated lung adenocarcinoma transcript 1 (non-protein coding)	uncatalog		NONREP_novel		31	1274	0.0136916	FALSE	FALSE			0	0	0	0	0	0.4591
11_65500965	11	65500965	A_G	+	single_cogn_Plus	ENSG00000251562	MALAT1	lincRNA	metastasis associated lung adenocarcinoma transcript 1 (non-protein coding)	uncatalog		NONREP_novel		129	1530	0.0365548	FALSE	FALSE			0	0	0	0	0	0.0596
11_65500982	11	65500982	A_G	+	single_cogn_Plus	ENSG00000251562	MALAT1	lincRNA	metastasis associated lung adenocarcinoma transcript 1 (non-protein coding)	uncatalog		NONREP_novel		315	1637	0.0950905	FALSE	FALSE	1	1	0	0	0	0	0	0.9416
11_65501021	11	65501021	A_G	+	single_cogn_Plus	ENSG00000251562	MALAT1	lincRNA	metastasis associated lung adenocarcinoma transcript 1 (non-protein coding)	uncatalog		NONREP_novel		15	1706	0.00330885	FALSE	FALSE			0	0	0	0	0	0.9191
11_65501199	11	65501199	A_G	+	single_cogn_Plus	ENSG00000251562	MALAT1	lincRNA	metastasis associated lung adenocarcinoma transcript 1 (non-protein coding)	uncatalog		NONREP_novel		12	1613	0.00474584	FALSE	FALSE			0	0	0	0	0	0.8875
11_65501460	11	65501460	A_G	+	single_cogn_Plus	ENSG00000251562	MALAT1	lincRNA	metastasis associated lung adenocarcinoma transcript 1 (non-protein coding)	uncatalog		NONREP_novel		10	2762	0.00105342	FALSE	FALSE	1	1	0	0	0	0	0	0.9995
11_65501497	11	65501497	A_G	+	single_cogn_Plus	ENSG00000251562	MALAT1	lincRNA	metastasis associated lung adenocarcinoma transcript 1 (non-protein coding)	uncatalog		NONREP_novel		52	1534	0.0142313	FALSE	FALSE			0	0	0	0	0	0.9337
11_65501593	11	65501593	A_G	+	single_cogn_Plus	ENSG00000251562	MALAT1	lincRNA	metastasis associated lung adenocarcinoma transcript 1 (non-protein coding)	uncatalog		NONREP_novel		10	2012	0.0013473	FALSE	FALSE			0	0	0	0	0	0.4377
11_65501626	11	65501626	A_G	+	single_cogn_Plus	ENSG00000251562	MALAT1	lincRNA	metastasis associated lung adenocarcinoma transcript 1 (non-protein coding)	uncatalog		NONREP_novel		11	2046	0.00166154	FALSE	FALSE			0	0	0	0	0	0.9859
11_65501627	11	65501627	A_G	+	single_cogn_Plus	ENSG00000251562	MALAT1	lincRNA	metastasis associated lung adenocarcinoma transcript 1 (non-protein coding)	uncatalog		NONREP_novel		41	2043	0.009805	FALSE	FALSE	1	1	0	0	0	0	0	0.9261
11_65501668	11	65501668	A_G	+	single_cogn_Plus	ENSG00000251562	MALAT1	lincRNA	metastasis associated lung adenocarcinoma transcript 1 (non-protein coding)	uncatalog		NONREP_novel		14	1888	0.00349477	FALSE	FALSE			0	0	0	0	0	0.9235
11_65503230	11	65503230	A_G	+	single_cogn_Plus	ENSG00000251562	MALAT1	lincRNA	metastasis associated lung adenocarcinoma transcript 1 (non-protein coding)	uncatalog		NONREP_novel		13	1366	0.00664967	FALSE	FALSE			0	0	0	0	0	0.3264
11_65504093	11	65504093	A_G	+	single_cogn_Plus	ENSG00000251562	MALAT1	lincRNA	metastasis associated lung adenocarcinoma transcript 1 (non-protein coding)	uncatalog		NONREP_novel		25	674	0.0310075	FALSE	FALSE			0	0	0	0	0	0.962
11_65504322	11	65504322	A_G	+	single_cogn_Plus	ENSG00000251562	MALAT1	lincRNA	metastasis associated lung adenocarcinoma transcript 1 (non-protein coding)	uncatalog		NONREP_novel		21	1467	0.00465137	FALSE	FALSE			0	0	0	0	0	0.8724
11_65504565	11	65504565	A_G	+	single_cogn_Plus	ENSG00000251562	MALAT1	lincRNA	metastasis associated lung adenocarcinoma transcript 1 (non-protein coding)	uncatalog		NONREP_novel		52	1820	0.0160561	FALSE	FALSE			0	0	0	0	0	0.9395
11_65504570	11	65504570	A_G	+	single_cogn_Plus	ENSG00000251562	MALAT1	lincRNA	metastasis associated lung adenocarcinoma transcript 1 (non-protein coding)	uncatalog		NONREP_novel		19	1744	0.00616171	FALSE	FALSE			0	0	0	0	0	0.0184
11_65504872	11	65504872	A_G	+	single_cogn_Plus	ENSG00000251562	MALAT1	lincRNA	metastasis associated lung adenocarcinoma transcript 1 (non-protein coding)	uncatalog		NONREP_novel		13	2589	0.00144316	FALSE	FALSE			0	0	0	0	0	0.1536
11_65505395	11	65505395	A_G	+	single_cogn_Plus	ENSG00000251562	MALAT1	lincRNA	metastasis associated lung adenocarcinoma transcript 1 (non-protein coding)	uncatalog		NONREP_novel		47	2162	0.00870465	FALSE	FALSE			0	0	0	0	0	0.1431
11_65505436	11	65505436	A_G	+	single_cogn_Plus	ENSG00000251562	MALAT1	lincRNA	metastasis associated lung adenocarcinoma transcript 1 (non-protein coding)	uncatalog		NONREP_novel		10	2647	0.00116476	FALSE	FALSE			0	0	0	0	0	0.5981
11_65505565	11	65505565	A_G	+	single_cogn_Plus	ENSG00000251562	MALAT1	lincRNA	metastasis associated lung adenocarcinoma transcript 1 (non-protein coding)	uncatalog		NONREP_novel		41	2868	0.00527977	FALSE	FALSE			0	0	0	0	0	0.8167
11_67413913	11	67413913	T_C	-	single_cogn_Minus	ENSG00000172531	PPP1CA	protein_coding	protein phosphatase 1 catalytic subunit alpha	uncatalog	AluSc5_1080	ALU_novel	intronic	13	75	0.173333	FALSE	FALSE	1	1	0	0	0	0	0	0.026
11_83494599	11	83494599	T_C	-	single_cogn_Minus	ENSG00000150672	DLG2	protein_coding	discs large MAGUK scaffold protein 2	uncatalog		NONREP_novel	intronic	28	280	0.0871132	FALSE	FALSE			0	0	0	0	0	0.7601
11_83494628	11	83494628	T_C	-	single_cogn_Minus	ENSG00000150672	DLG2	protein_coding	discs large MAGUK scaffold protein 2	uncatalog		NONREP_novel	intronic	17	301	0.0443969	FALSE	FALSE			0	0	0	0	0	0.7789
11_83743510	11	83743510	T_C	-	single_cogn_Minus	ENSG00000150672	DLG2	protein_coding	discs large MAGUK scaffold protein 2	uncatalog	AluJb_1806	ALU_novel	intronic	16	264	0.0561192	FALSE	FALSE			0	0	0	0	0	0.6599
11_84237025	11	84237025	T_C	-	single_cogn_Minus	ENSG00000150672	DLG2	protein_coding	discs large MAGUK scaffold protein 2	uncatalog	AluSc8_2447	ALU_novel	intronic	18	91	0.187491	FALSE	FALSE			0	0	0	0	0	0.9089
11_105785983	11	105785983	A_G	+	single_cogn_Plus	ENSG00000152578	GRIA4	protein_coding	glutamate ionotropic receptor AMPA type subunit 4	uncatalog	AluSx_2226	ALU_novel	intronic	17	72	0.231481	FALSE	FALSE			0	0	0	0	0	0.9941
11_117762487	11	117762487	T_C	-	single_cogn_Minus	ENSG00000177103	DSCAML1	protein_coding	DS cell adhesion molecule like 1	uncatalog		NONREP_novel	intronic	14	93	0.134722	FALSE	FALSE			0	0	0	0	0	0.7689
11_117762494	11	117762494	T_C	-	single_cogn_Minus	ENSG00000177103	DSCAML1	protein_coding	DS cell adhesion molecule like 1	uncatalog		NONREP_novel	intronic	13	95	0.136184	FALSE	FALSE			0	0	0	0	0	0.7439
11_133485999	11	133485999	T_C	-	single_cogn_Minus	ENSG00000183715	OPCML	protein_coding	opioid binding protein/cell adhesion molecule like	uncatalog		NONREP_novel	intronic	11	200	0.0470893	FALSE	FALSE			0	0	0	0	0	0.9112
21_8255270	21	8255270	T_C	-	single_cogn_Minus	ENSG00000281383	FP671120.4	lincRNA	NULL	uncatalog		NONREP_novel		37	3018	0.00845791	FALSE	FALSE			0	0	0	0	0	0.9923
21_8255410	21	8255410	T_C	-	single_cogn_Minus	ENSG00000281383	FP671120.4	lincRNA	NULL	uncatalog		NONREP_novel		14	786	0.0114125	FALSE	FALSE			0	0	0	0	0	0.3322
21_25880854	21	25880854	T_C	-	single_cogn_Minus	ENSG00000142192	APP	protein_coding	amyloid beta precursor protein	uncatalog		NONREP_novel	three_prime_utr	11	1135	0.00510531	FALSE	FALSE			0	0	0	0	0	0.512
21_25880867	21	25880867	T_C	-	single_cogn_Minus	ENSG00000142192	APP	protein_coding	amyloid beta precursor protein	uncatalog		NONREP_novel	three_prime_utr	13	1009	0.00377791	FALSE	FALSE	1	1	0	0	0	0	0	0.5109
21_40139739	21	40139739	T_C	-	single_cogn_Minus	ENSG00000171587	DSCAM	protein_coding	DS cell adhesion molecule	uncatalog		NONREP_novel	intronic	11	184	0.0529406	FALSE	FALSE			0	0	0	0	0	0.3959
21_40597537	21	40597537	T_C	-	single_cogn_Minus	ENSG00000171587	DSCAM	protein_coding	DS cell adhesion molecule	uncatalog	AluSx1_2196	ALU_novel	intronic	12	257	0.0347629	FALSE	FALSE			0	0	0	0	0	0.9998
21_40597572	21	40597572	T_C	-	single_cogn_Minus	ENSG00000171587	DSCAM	protein_coding	DS cell adhesion molecule	uncatalog	AluSx1_2196	ALU_novel	intronic	11	352	0.0214628	FALSE	FALSE			0	0	0	0	0	0.6324
21_40597574	21	40597574	T_C	-	single_cogn_Minus	ENSG00000171587	DSCAM	protein_coding	DS cell adhesion molecule	uncatalog	AluSx1_2196	ALU_novel	intronic	19	352	0.0471995	FALSE	FALSE			0	0	0	0	0	0.958
21_40597579	21	40597579	T_C	-	single_cogn_Minus	ENSG00000171587	DSCAM	protein_coding	DS cell adhesion molecule	uncatalog	AluSx1_2196	ALU_novel	intronic	12	345	0.0258458	FALSE	FALSE			0	0	0	0	0	0.2118
21_40808536	21	40808536	T_C	-	single_cogn_Minus	ENSG00000171587	DSCAM	protein_coding	DS cell adhesion molecule	uncatalog	AluJb_1841	ALU_novel	intronic	42	160	0.249014	FALSE	FALSE			0	0	0	0	0	0.9725
21_40808683	21	40808683	T_C	-	single_cogn_Minus	ENSG00000171587	DSCAM	protein_coding	DS cell adhesion molecule	uncatalog	AluJb_1841	ALU_novel	intronic	13	86	0.150551	FALSE	FALSE			0	0	0	0	0	0.5381
1_7767650	1	7767650	A_G	+	single_cogn_Plus	ENSG00000171735	CAMTA1	protein_coding	calmodulin binding transcription activator 1	uncatalog		NONREP_novel	three_prime_utr	14	1343	0.00505173	FALSE	FALSE	2	1	0	0	0	0	0	0.9912
1_7769577	1	7769577	A_G	+	single_cogn_Plus	ENSG00000171735	CAMTA1	protein_coding	calmodulin binding transcription activator 1	uncatalog		NONREP_novel	three_prime_utr	16	1321	0.00709023	FALSE	FALSE			0	0	0	0	0	0.5581
1_8596748	1	8596748	T_C	-	single_cogn_Minus	ENSG00000142599	RERE	protein_coding	arginine-glutamic acid dipeptide repeats	uncatalog	AluJr4_1532	ALU_novel	intronic	10	173	0.0545004	FALSE	FALSE	1	1	0	0	0	0	0	0.2634
1_8596798	1	8596798	T_C	-	single_cogn_Minus	ENSG00000142599	RERE	protein_coding	arginine-glutamic acid dipeptide repeats	ALU	AluJr4_1532	ALU	intronic	34	132	0.249417	FALSE	FALSE			1	1	0	0	0	0.9989
1_10335741	1	10335741	A_G	+	single_cogn_Plus	ENSG00000054523	KIF1B	protein_coding	kinesin family member 1B	REP	FLAM_A_899	REP	intronic	22	75	0.293333	FALSE	FALSE	3	3	1	1	1	0	0	0.7558
1_11252416	1	11252416	T_C	-	single_cogn_Minus	ENSG00000198793	MTOR	protein_coding	mechanistic target of rapamycin	uncatalog	AluJb_828	ALU_novel	intronic	12	60	0.2	FALSE	FALSE			0	0	0	0	0	0.6902
1_12256057	1	12256057	A_G	+	single_cogn_Plus	ENSG00000048707	VPS13D	protein_coding	vacuolar protein sorting 13 homolog D	REP	FLAM_C_757	REP	intronic	13	41	0.302591	FALSE	FALSE			1	1	1	0	0	0.9995
1_12256127	1	12256127	A_G	+	single_cogn_Plus	ENSG00000048707	VPS13D	protein_coding	vacuolar protein sorting 13 homolog D	REP	FLAM_C_757	REP	intronic	26	60	0.426515	FALSE	FALSE			1	1	1	0	0	0.7364
1_12256128	1	12256128	A_G	+	single_cogn_Plus	ENSG00000048707	VPS13D	protein_coding	vacuolar protein sorting 13 homolog D	REP	FLAM_C_757	REP	intronic	22	62	0.34824	FALSE	FALSE			1	1	0	0	0	0.6672
1_14070126	1	14070126	A_G	+	single_cogn_Plus	ENSG00000189337	KAZN	protein_coding	kazrin, periplakin interacting protein	ALU	AluSc_2309	ALU	intronic	12	72	0.164141	FALSE	FALSE			1	0	0	0	0	0.0061
1_20751671	1	20751671	T_C	-	single_cogn_Minus	ENSG00000127483	HP1BP3	protein_coding	heterochromatin protein 1 binding protein 3	ALU	AluJr_1621	ALU	intronic	40	72	0.370915	FALSE	FALSE	2	1	1	1	1	0	0	0.2991
1_20869347	1	20869347	T_C	-	single_cogn_Minus	ENSG00000075151	EIF4G3	protein_coding	eukaryotic translation initiation factor 4 gamma 3	REP	FLAM_A_735	REP	intronic	50	185	0.260616	FALSE	FALSE	8	3	1	1	0	0	0	0.6962
1_21042079	1	21042079	T_C	-	single_cogn_Minus	ENSG00000075151	EIF4G3	protein_coding	eukaryotic translation initiation factor 4 gamma 3	uncatalog	AluJb_1820	ALU_novel	intronic	12	201	0.0597015	FALSE	FALSE	1	1	0	0	0	0	0	0.9868
1_21042101	1	21042101	T_C	-	single_cogn_Minus	ENSG00000075151	EIF4G3	protein_coding	eukaryotic translation initiation factor 4 gamma 3	uncatalog	AluJb_1820	ALU_novel	intronic	24	179	0.1289	FALSE	FALSE			0	0	0	0	0	0.6519
1_21042102	1	21042102	T_C	-	single_cogn_Minus	ENSG00000075151	EIF4G3	protein_coding	eukaryotic translation initiation factor 4 gamma 3	uncatalog	AluJb_1820	ALU_novel	intronic	12	175	0.0637143	FALSE	FALSE			0	0	0	0	0	0.4927
1_21042103	1	21042103	T_C	-	single_cogn_Minus	ENSG00000075151	EIF4G3	protein_coding	eukaryotic translation initiation factor 4 gamma 3	ALU	AluJb_1820	ALU	intronic	25	173	0.13578	FALSE	FALSE			1	0	0	0	0	0.8036
1_21158223	1	21158223	T_C	-	single_cogn_Minus	ENSG00000075151	EIF4G3	protein_coding	eukaryotic translation initiation factor 4 gamma 3	uncatalog	AluJb_1981	ALU_novel	intronic	12	220	0.0522653	FALSE	FALSE	2	1	0	0	0	0	0	0.8656
1_21158236	1	21158236	T_C	-	single_cogn_Minus	ENSG00000075151	EIF4G3	protein_coding	eukaryotic translation initiation factor 4 gamma 3	ALU	AluJb_1981	ALU	intronic	54	250	0.199932	FALSE	FALSE	21	4	1	1	0	0	0	0.9205
1_21158273	1	21158273	T_C	-	single_cogn_Minus	ENSG00000075151	EIF4G3	protein_coding	eukaryotic translation initiation factor 4 gamma 3	ALU	AluJb_1981	ALU	intronic	57	251	0.214711	FALSE	FALSE	17	5	1	1	1	0	0	0.3905
1_21158300	1	21158300	T_C	-	single_cogn_Minus	ENSG00000075151	EIF4G3	protein_coding	eukaryotic translation initiation factor 4 gamma 3	ALU	AluJb_1981	ALU	intronic	69	176	0.382676	FALSE	FALSE	26	4	1	1	1	1	0	0.7998
1_21158304	1	21158304	T_C	-	single_cogn_Minus	ENSG00000075151	EIF4G3	protein_coding	eukaryotic translation initiation factor 4 gamma 3	ALU	AluJb_1981	ALU	intronic	26	175	0.148	FALSE	FALSE	3	2	1	1	0	0	0	0.9549
1_21158308	1	21158308	T_C	-	single_cogn_Minus	ENSG00000075151	EIF4G3	protein_coding	eukaryotic translation initiation factor 4 gamma 3	ALU	AluJb_1981	ALU	intronic	12	169	0.0642146	FALSE	FALSE	1	1	1	1	0	0	0	0.6903
1_21158324	1	21158324	T_C	-	single_cogn_Minus	ENSG00000075151	EIF4G3	protein_coding	eukaryotic translation initiation factor 4 gamma 3	ALU	AluJb_1981	ALU	intronic	12	153	0.0781201	FALSE	FALSE	3	3	1	1	0	0	0	0.744
1_21158427	1	21158427	T_C	-	single_cogn_Minus	ENSG00000075151	EIF4G3	protein_coding	eukaryotic translation initiation factor 4 gamma 3	ALU	AluJb_1981	ALU	intronic	16	85	0.186555	FALSE	FALSE	4	4	1	1	1	0	0	0.3534
1_21158434	1	21158434	T_C	-	single_cogn_Minus	ENSG00000075151	EIF4G3	protein_coding	eukaryotic translation initiation factor 4 gamma 3	ALU	AluJb_1981	ALU	intronic	10	85	0.112418	FALSE	FALSE	16	5	1	1	1	0	0	0.6658
1_21637239	1	21637239	T_C	-	single_cogn_Minus	ENSG00000076864	RAP1GAP	protein_coding	RAP1 GTPase activating protein	ALU	AluJb_2064	ALU	intronic	34	94	0.342806	FALSE	FALSE	1	1	1	1	1	0	0	0.3425
1_21637242	1	21637242	T_C	-	single_cogn_Minus	ENSG00000076864	RAP1GAP	protein_coding	RAP1 GTPase activating protein	uncatalog	AluJb_2064	ALU_novel	intronic	19	92	0.199728	FALSE	FALSE	1	1	0	0	0	0	0	0.5308
1_21637249	1	21637249	T_C	-	single_cogn_Minus	ENSG00000076864	RAP1GAP	protein_coding	RAP1 GTPase activating protein	ALU	AluJb_2064	ALU	intronic	32	84	0.366738	FALSE	FALSE	1	1	1	1	0	0	0	0.957
1_21685546	1	21685546	T_C	-	single_cogn_Minus	ENSG00000090686	USP48	protein_coding	ubiquitin specific peptidase 48	ALU	AluSz_1997	ALU	intronic	16	70	0.211012	FALSE	FALSE			1	1	1	0	0	0.8439
1_25901629	1	25901629	T_C	-	single_cogn_Minus	ENSG00000117632	STMN1	protein_coding	stathmin 1	uncatalog		NONREP_novel	exonic	12	452	0.0162752	FALSE	FALSE			0	0	0	0	0	0.9954
1_25901630	1	25901630	T_C	-	single_cogn_Minus	ENSG00000117632	STMN1	protein_coding	stathmin 1	uncatalog		NONREP_novel	exonic	22	451	0.032996	FALSE	FALSE			0	0	0	0	0	0.9989
1_25901631	1	25901631	T_C	-	single_cogn_Minus	ENSG00000117632	STMN1	protein_coding	stathmin 1	uncatalog		NONREP_novel	exonic	30	455	0.0450241	FALSE	FALSE			0	0	0	0	0	0.9972
1_25901633	1	25901633	T_C	-	single_cogn_Minus	ENSG00000117632	STMN1	protein_coding	stathmin 1	uncatalog		NONREP_novel	exonic	27	453	0.0448966	FALSE	FALSE			0	0	0	0	0	0.9994
1_26704679	1	26704679	A_G	+	single_cogn_Plus	ENSG00000117713	ARID1A	protein_coding	AT-rich interaction domain 1A	ALU	AluJo_1784	ALU	intronic	17	36	0.472222	FALSE	FALSE			1	1	1	0	0	0.4457
1_26704706	1	26704706	A_G	+	single_cogn_Plus	ENSG00000117713	ARID1A	protein_coding	AT-rich interaction domain 1A	ALU	AluJo_1784	ALU	intronic	12	44	0.272727	FALSE	FALSE			1	1	0	0	0	0.6992
1_26731352	1	26731352	A_G	+	single_cogn_Plus	ENSG00000117713	ARID1A	protein_coding	AT-rich interaction domain 1A	uncatalog		NONREP_novel	exonic	18	502	0.0245788	FALSE	FALSE			0	0	0	0	0	0.8539
1_28842895	1	28842895	A_G	+	single_cogn_Plus	ENSG00000116329	OPRD1	protein_coding	opioid receptor delta 1	uncatalog	AluJo_1107	ALU_novel	intronic	10	64	0.15625	FALSE	FALSE			0	0	0	0	0	0.8246
1_28842925	1	28842925	A_G	+	single_cogn_Plus	ENSG00000116329	OPRD1	protein_coding	opioid receptor delta 1	uncatalog	AluJo_1107	ALU_novel	intronic	14	91	0.147619	FALSE	FALSE			0	0	0	0	0	0.837
1_32368759	1	32368759	T_C	-	single_cogn_Minus	ENSG00000160058	BSDC1	protein_coding	BSD domain containing 1	ALU	AluSz_2260	ALU	intronic	12	120	0.0986111	FALSE	FALSE	1	1	1	1	1	1	0	0.667
1_35177374	1	35177374	T_C	-	single_cogn_Minus	ENSG00000116560	SFPQ	protein_coding	splicing factor proline and glutamine rich	uncatalog		NONREP_novel	three_prime_utr	12	819	0.0102722	FALSE	FALSE	1	1	0	0	0	0	0	0.9741
1_35302931	1	35302931	A_G	+	single_cogn_Plus	ENSG00000146463	ZMYM4	protein_coding	zinc finger MYM-type containing 4	REP	FLAM_A_827	REP	intronic	16	54	0.296296	FALSE	FALSE	8	3	1	0	0	0	0	0.8464
1_39872110	1	39872110	T_C	-	single_cogn_Minus	ENSG00000043514	TRIT1	protein_coding	tRNA isopentenyltransferase 1	ALU	AluJb_1640	ALU	intronic	34	120	0.283333	FALSE	FALSE	1	1	1	1	0	0	0	0.2524
1_39872112	1	39872112	T_C	-	single_cogn_Minus	ENSG00000043514	TRIT1	protein_coding	tRNA isopentenyltransferase 1	ALU	AluJb_1640	ALU	intronic	19	131	0.143342	FALSE	FALSE			1	1	0	0	0	0.5971
1_39872153	1	39872153	T_C	-	single_cogn_Minus	ENSG00000043514	TRIT1	protein_coding	tRNA isopentenyltransferase 1	ALU	AluJb_1640	ALU	intronic	50	148	0.33583	FALSE	FALSE	2	1	1	1	0	0	0	0.5682
1_40399434	1	40399434	A_G	+	single_cogn_Plus	ENSG00000084070	SMAP2	protein_coding	small ArfGAP2	ALU	AluSx_2123	ALU	intronic	14	78	0.171706	FALSE	FALSE	1	1	1	1	0	0	0	0.4637
1_40399581	1	40399581	A_G	+	single_cogn_Plus	ENSG00000084070	SMAP2	protein_coding	small ArfGAP2	ALU	AluJr_1276	ALU	intronic	134	197	0.495927	FALSE	FALSE	6	2	1	1	1	0	0	0.9793
1_40399587	1	40399587	A_G	+	single_cogn_Plus	ENSG00000084070	SMAP2	protein_coding	small ArfGAP2	ALU	AluJr_1276	ALU	intronic	47	133	0.328638	FALSE	FALSE			1	1	0	0	0	0.9996
1_40399591	1	40399591	A_G	+	single_cogn_Plus	ENSG00000084070	SMAP2	protein_coding	small ArfGAP2	ALU	AluJr_1276	ALU	intronic	31	145	0.200015	FALSE	FALSE	1	1	1	1	1	0	0	0.9874
1_40399598	1	40399598	A_G	+	single_cogn_Plus	ENSG00000084070	SMAP2	protein_coding	small ArfGAP2	uncatalog	AluJr_1276	ALU_novel	intronic	10	152	0.0543024	FALSE	FALSE	1	1	0	0	0	0	0	0.8497
1_40399636	1	40399636	A_G	+	single_cogn_Plus	ENSG00000084070	SMAP2	protein_coding	small ArfGAP2	ALU	AluJr_1276	ALU	intronic	17	191	0.0795777	FALSE	FALSE	1	1	1	1	0	0	0	0.8158
1_40399651	1	40399651	A_G	+	single_cogn_Plus	ENSG00000084070	SMAP2	protein_coding	small ArfGAP2	ALU	AluJr_1276	ALU	intronic	11	205	0.045154	FALSE	FALSE			1	1	1	0	0	0.0207
1_42248832	1	42248832	T_C	-	single_cogn_Minus	ENSG00000198815	FOXJ3	protein_coding	forkhead box J3	REP		REP	intronic	15	85	0.167941	FALSE	FALSE			1	1	0	0	0	0.8429
1_42290726	1	42290726	T_C	-	single_cogn_Minus	ENSG00000198815	FOXJ3	protein_coding	forkhead box J3	NONREP		NONREP	intronic	18	46	0.391304	FALSE	FALSE			1	1	0	0	0	0.6418
1_42290730	1	42290730	T_C	-	single_cogn_Minus	ENSG00000198815	FOXJ3	protein_coding	forkhead box J3	uncatalog		NONREP_novel	intronic	16	43	0.372093	FALSE	FALSE			0	0	0	0	0	0.1705
1_42290735	1	42290735	T_C	-	single_cogn_Minus	ENSG00000198815	FOXJ3	protein_coding	forkhead box J3	uncatalog		NONREP_novel	intronic	10	41	0.239024	FALSE	FALSE			0	0	0	0	0	0.6586
1_42290750	1	42290750	T_C	-	single_cogn_Minus	ENSG00000198815	FOXJ3	protein_coding	forkhead box J3	NONREP		NONREP	intronic	10	32	0.3125	FALSE	FALSE	1	1	1	1	0	0	0	0.2349
1_42290765	1	42290765	T_C	-	single_cogn_Minus	ENSG00000198815	FOXJ3	protein_coding	forkhead box J3	NONREP		NONREP	intronic	12	25	0.474286	FALSE	FALSE	1	1	1	1	0	0	0	0.8218
1_42290806	1	42290806	T_C	-	single_cogn_Minus	ENSG00000198815	FOXJ3	protein_coding	forkhead box J3	NONREP		NONREP	intronic	13	16	0.8125	FALSE	FALSE	2	2	1	1	0	0	0	0.0206
1_42328718	1	42328718	T_C	-	single_cogn_Minus	ENSG00000198815	FOXJ3	protein_coding	forkhead box J3	ALU	AluSx1_1963	ALU	intronic	21	106	0.197589	FALSE	FALSE			1	0	0	0	0	0.3422
1_42328763	1	42328763	T_C	-	single_cogn_Minus	ENSG00000198815	FOXJ3	protein_coding	forkhead box J3	ALU	AluSx1_1963	ALU	intronic	23	94	0.242553	FALSE	FALSE	1	1	1	0	0	0	0	0.0786
1_42328823	1	42328823	T_C	-	single_cogn_Minus	ENSG00000198815	FOXJ3	protein_coding	forkhead box J3	ALU	AluSx1_1963	ALU	intronic	30	53	0.55283	FALSE	FALSE	1	1	1	1	0	0	0	0.4378
1_42328832	1	42328832	T_C	-	single_cogn_Minus	ENSG00000198815	FOXJ3	protein_coding	forkhead box J3	ALU	AluSx1_1963	ALU	intronic	16	51	0.313725	FALSE	FALSE	1	1	1	1	0	0	0	0.8211
1_42328939	1	42328939	T_C	-	single_cogn_Minus	ENSG00000198815	FOXJ3	protein_coding	forkhead box J3	ALU	AluSx1_1963	ALU	intronic	23	30	0.766667	FALSE	FALSE	1	1	1	1	0	0	0	0.9488
1_45610040	1	45610040	A_G	+	single_cogn_Plus	ENSG00000132780	NASP	protein_coding	nuclear autoantigenic sperm protein	ALU	AluSx4_2109	ALU	exonic	18	129	0.135827	FALSE	FALSE			1	1	0	0	0	0.4245
1_45610041	1	45610041	A_G	+	single_cogn_Plus	ENSG00000132780	NASP	protein_coding	nuclear autoantigenic sperm protein	ALU	AluSx4_2109	ALU	exonic	31	127	0.226409	FALSE	FALSE			1	1	0	0	0	0.3948
1_45610043	1	45610043	A_G	+	single_cogn_Plus	ENSG00000132780	NASP	protein_coding	nuclear autoantigenic sperm protein	ALU	AluSx4_2109	ALU	exonic	71	125	0.557962	FALSE	FALSE			1	1	1	1	1	0.9182
1_45610046	1	45610046	A_G	+	single_cogn_Plus	ENSG00000132780	NASP	protein_coding	nuclear autoantigenic sperm protein	ALU	AluSx4_2109	ALU	exonic	42	125	0.307174	FALSE	FALSE			1	1	1	0	0	0.8835
1_45610047	1	45610047	A_G	+	single_cogn_Plus	ENSG00000132780	NASP	protein_coding	nuclear autoantigenic sperm protein	ALU	AluSx4_2109	ALU	exonic	36	129	0.267404	FALSE	FALSE			1	1	0	0	0	0.57
1_45610048	1	45610048	A_G	+	single_cogn_Plus	ENSG00000132780	NASP	protein_coding	nuclear autoantigenic sperm protein	ALU	AluSx4_2109	ALU	exonic	22	130	0.153328	FALSE	FALSE			1	1	0	0	0	0.4819
1_45610052	1	45610052	A_G	+	single_cogn_Plus	ENSG00000132780	NASP	protein_coding	nuclear autoantigenic sperm protein	ALU	AluSx4_2109	ALU	exonic	204	232	0.76613	FALSE	FALSE	2	1	1	1	1	1	1	0.0136
1_45610084	1	45610084	A_G	+	single_cogn_Plus	ENSG00000132780	NASP	protein_coding	nuclear autoantigenic sperm protein	ALU	AluSx4_2109	ALU	exonic	17	128	0.13125	TRUE	FALSE			1	1	1	1	1	0.9915
1_45610131	1	45610131	A_G	+	single_cogn_Plus	ENSG00000132780	NASP	protein_coding	nuclear autoantigenic sperm protein	ALU	AluSx4_2109	ALU	exonic	59	210	0.27078	FALSE	FALSE	1	1	1	1	1	1	1	0.6682
1_45610133	1	45610133	A_G	+	single_cogn_Plus	ENSG00000132780	NASP	protein_coding	nuclear autoantigenic sperm protein	ALU	AluSx4_2109	ALU	exonic	40	238	0.158383	FALSE	FALSE			1	1	1	1	1	0.4549
1_51264210	1	51264210	A_G	+	single_cogn_Plus	ENSG00000123091	RNF11	protein_coding	ring finger protein 11	ALU	AluJb_2005	ALU	intronic	13	98	0.132377	FALSE	FALSE	1	1	1	0	0	0	0	0.9898
1_61113536	1	61113536	A_G	+	single_cogn_Plus	ENSG00000162599	NFIA	protein_coding	nuclear factor I A	ALU	AluSq2_2182	ALU	intronic	10	56	0.165179	FALSE	FALSE			1	1	1	0	0	0.9971
1_66695197	1	66695197	A_G	+	single_cogn_Plus	ENSG00000118473	SGIP1	protein_coding	SH3 domain GRB2 like endophilin interacting protein 1	uncatalog		NONREP_novel	five_prime_utr	10	461	0.0135951	FALSE	FALSE			0	0	0	0	0	0.4538
1_70054693	1	70054693	A_G	+	single_cogn_Plus	ENSG00000033122	LRRC7	protein_coding	leucine rich repeat containing 7	ALU	AluY_2138	ALU	intronic	15	71	0.206934	FALSE	FALSE	1	1	1	0	0	0	0	0.611
1_72157170	1	72157170	T_C	-	single_cogn_Minus	ENSG00000172260	NEGR1	protein_coding	neuronal growth regulator 1	ALU	AluJo_1729	ALU	intronic	10	85	0.111765	FALSE	FALSE			1	1	1	1	0	0.9396
1_72187120	1	72187120	T_C	-	single_cogn_Minus	ENSG00000172260	NEGR1	protein_coding	neuronal growth regulator 1	uncatalog		NONREP_novel	intronic	12	242	0.0495868	FALSE	FALSE			0	0	0	0	0	0.8108
1_77423170	1	77423170	A_G	+	single_cogn_Plus	ENSG00000154027	AK5	protein_coding	adenylate kinase 5	uncatalog	AluY_2498	ALU_novel	intronic	14	183	0.074421	FALSE	FALSE			0	0	0	0	0	0.9639
1_77423171	1	77423171	A_G	+	single_cogn_Plus	ENSG00000154027	AK5	protein_coding	adenylate kinase 5	ALU	AluY_2498	ALU	intronic	69	186	0.344877	FALSE	FALSE			1	1	0	1	0	0.7077
1_77964922	1	77964922	T_C	-	single_cogn_Minus	ENSG00000162613	FUBP1	protein_coding	far upstream element binding protein 1	uncatalog		NONREP_novel	exonic	10	110	0.0909091	FALSE	FALSE	1	1	0	0	0	0	0	0.7832
1_83949399	1	83949399	T_C	-	single_cogn_Minus	ENSG00000137941	TTLL7	protein_coding	tubulin tyrosine ligase like 7	ALU	AluSc_2245	ALU	exonic	22	521	0.0327957	FALSE	FALSE	1	1	1	1	1	0	0	0.2663
1_83949403	1	83949403	T_C	-	single_cogn_Minus	ENSG00000137941	TTLL7	protein_coding	tubulin tyrosine ligase like 7	ALU	AluSc_2245	ALU	exonic	15	495	0.0261283	FALSE	FALSE			1	1	1	0	0	0.3796
1_83949405	1	83949405	T_C	-	single_cogn_Minus	ENSG00000137941	TTLL7	protein_coding	tubulin tyrosine ligase like 7	ALU	AluSc_2245	ALU	exonic	270	452	0.562574	FALSE	TRUE	5	3	1	1	1	1	1	0.2923
1_92345260	1	92345260	A_G	+	single_cogn_Plus	ENSG00000122484	RPAP2	protein_coding	RNA polymerase II associated protein 2	REP	FAM_1166	REP	intronic	18	84	0.214286	FALSE	FALSE			1	1	0	0	0	0.1875
1_92345286	1	92345286	A_G	+	single_cogn_Plus	ENSG00000122484	RPAP2	protein_coding	RNA polymerase II associated protein 2	uncatalog	FAM_1166	REP_novel	intronic	10	103	0.0970874	FALSE	FALSE			0	0	0	0	0	0.7445
1_92345291	1	92345291	A_G	+	single_cogn_Plus	ENSG00000122484	RPAP2	protein_coding	RNA polymerase II associated protein 2	REP	FAM_1166	REP	intronic	31	102	0.290608	FALSE	FALSE			1	1	1	0	0	0.5319
1_92345300	1	92345300	A_G	+	single_cogn_Plus	ENSG00000122484	RPAP2	protein_coding	RNA polymerase II associated protein 2	uncatalog	FAM_1166	REP_novel	intronic	18	116	0.147989	FALSE	FALSE			0	0	0	0	0	0.6632
1_92345305	1	92345305	A_G	+	single_cogn_Plus	ENSG00000122484	RPAP2	protein_coding	RNA polymerase II associated protein 2	REP	FAM_1166	REP	intronic	51	120	0.416004	FALSE	FALSE			1	1	1	0	0	0.6242
1_92345352	1	92345352	A_G	+	single_cogn_Plus	ENSG00000122484	RPAP2	protein_coding	RNA polymerase II associated protein 2	REP	FAM_1166	REP	intronic	45	128	0.342603	FALSE	FALSE			1	0	0	0	0	0.9177
1_109257206	1	109257206	A_G	+	single_cogn_Plus	ENSG00000143126	CELSR2	protein_coding	cadherin EGF LAG seven-pass G-type receptor 2	uncatalog	AluJr_1910	ALU_novel	intronic	11	29	0.37931	FALSE	FALSE			0	0	0	0	0	0.8172
1_109257210	1	109257210	A_G	+	single_cogn_Plus	ENSG00000143126	CELSR2	protein_coding	cadherin EGF LAG seven-pass G-type receptor 2	ALU	AluJr_1910	ALU	intronic	10	29	0.344828	FALSE	FALSE			1	1	0	0	0	0.7443
1_109257216	1	109257216	A_G	+	single_cogn_Plus	ENSG00000143126	CELSR2	protein_coding	cadherin EGF LAG seven-pass G-type receptor 2	ALU	AluJr_1910	ALU	intronic	16	33	0.484848	FALSE	FALSE			1	1	0	0	0	0.67
1_109257223	1	109257223	A_G	+	single_cogn_Plus	ENSG00000143126	CELSR2	protein_coding	cadherin EGF LAG seven-pass G-type receptor 2	uncatalog	AluJr_1910	ALU_novel	intronic	14	37	0.378378	FALSE	FALSE			0	0	0	0	0	0.6031
1_109257292	1	109257292	A_G	+	single_cogn_Plus	ENSG00000143126	CELSR2	protein_coding	cadherin EGF LAG seven-pass G-type receptor 2	ALU	AluJr_1910	ALU	intronic	16	44	0.357576	FALSE	FALSE	1	1	1	1	0	0	0	0.0247
1_110593724	1	110593724	T_C	-	single_cogn_Minus	ENSG00000177301	KCNA2	protein_coding	potassium voltage-gated channel subfamily A member 2	uncatalog		NONREP_novel	three_prime_utr	11	567	0.012853	FALSE	FALSE			0	0	0	0	0	0.8717
1_111770911	1	111770911	T_C	-	single_cogn_Minus	ENSG00000171385	KCND3	protein_coding	potassium voltage-gated channel subfamily D member 3	uncatalog		NONREP_novel	three_prime_utr	85	397	0.172614	FALSE	FALSE	2	2	0	0	0	0	0	0.2496
1_114717465	1	114717465	T_C	-	single_cogn_Minus	ENSG00000009307	CSDE1	protein_coding	cold shock domain containing E1	uncatalog		NONREP_novel	three_prime_utr	17	651	0.0131556	FALSE	FALSE	3	2	0	0	0	0	0	0.9163
1_117088448	1	117088448	A_G	+	single_cogn_Plus	ENSG00000116830	TTF2	protein_coding	transcription termination factor 2	uncatalog	AluY_2509	ALU_novel	intronic	19	2028	0.00517164	FALSE	FALSE			0	0	0	0	0	0.5856
1_117088449	1	117088449	A_G	+	single_cogn_Plus	ENSG00000116830	TTF2	protein_coding	transcription termination factor 2	ALU	AluY_2509	ALU	intronic	126	1899	0.0395253	FALSE	FALSE			1	1	1	1	0	0.6317
1_145775458	1	145775458	T_C	-	single_cogn_Minus	ENSG00000265491	RNF115	protein_coding	ring finger protein 115	uncatalog	AluJr_1549	ALU_novel	intronic	18	144	0.118981	FALSE	FALSE			0	0	0	0	0	0.8042
1_145775498	1	145775498	T_C	-	single_cogn_Minus	ENSG00000265491	RNF115	protein_coding	ring finger protein 115	uncatalog	AluJr_1549	ALU_novel	intronic	14	106	0.120516	FALSE	FALSE			0	0	0	0	0	0.9823
1_145775524	1	145775524	T_C	-	single_cogn_Minus	ENSG00000265491	RNF115	protein_coding	ring finger protein 115	uncatalog	AluJr_1549	ALU_novel	intronic	28	116	0.237931	FALSE	FALSE			0	0	0	0	0	0.0081
1_145775534	1	145775534	T_C	-	single_cogn_Minus	ENSG00000265491	RNF115	protein_coding	ring finger protein 115	uncatalog	AluJr_1549	ALU_novel	intronic	24	109	0.217431	FALSE	FALSE			0	0	0	0	0	0.3237
1_145775549	1	145775549	T_C	-	single_cogn_Minus	ENSG00000265491	RNF115	protein_coding	ring finger protein 115	uncatalog	AluJr_1549	ALU_novel	intronic	11	103	0.106796	FALSE	FALSE			0	0	0	0	0	0.5935
1_145775560	1	145775560	T_C	-	single_cogn_Minus	ENSG00000265491	RNF115	protein_coding	ring finger protein 115	uncatalog	AluJr_1549	ALU_novel	intronic	22	95	0.222744	FALSE	FALSE			0	0	0	0	0	0.4138
1_145775589	1	145775589	T_C	-	single_cogn_Minus	ENSG00000265491	RNF115	protein_coding	ring finger protein 115	uncatalog	AluJr_1549	ALU_novel	intronic	55	88	0.618939	FALSE	FALSE	1	1	0	0	0	0	0	0.3744
1_145775626	1	145775626	T_C	-	single_cogn_Minus	ENSG00000265491	RNF115	protein_coding	ring finger protein 115	uncatalog	AluJr_1549	ALU_novel	intronic	46	76	0.605263	FALSE	FALSE	1	1	0	0	0	0	0	0.7226
1_151843422	1	151843422	A_G	+	single_cogn_Plus	ENSG00000234614	AL450992.2	antisense_RNA	NULL	ALU	AluJr_1893	ALU		11	26	0.423077	FALSE	FALSE	3	2	1	1	1	1	0	0.4847
1_151843446	1	151843446	A_G	+	single_cogn_Plus	ENSG00000234614	AL450992.2	antisense_RNA	NULL	ALU	AluJr_1893	ALU		16	28	0.571429	FALSE	FALSE	2	1	1	1	1	1	0	0.1146
1_151843449	1	151843449	A_G	+	single_cogn_Plus	ENSG00000234614	AL450992.2	antisense_RNA	NULL	uncatalog	AluJr_1893	ALU_novel		11	33	0.333333	FALSE	FALSE	1	1	0	0	0	0	0	0.9446
1_151843463	1	151843463	A_G	+	single_cogn_Plus	ENSG00000234614	AL450992.2	antisense_RNA	NULL	ALU	AluJr_1893	ALU		17	55	0.309091	FALSE	FALSE	2	1	1	1	1	1	0	0.7084
1_151843506	1	151843506	A_G	+	single_cogn_Plus	ENSG00000234614	AL450992.2	antisense_RNA	NULL	ALU	AluJr_1893	ALU		23	73	0.305936	FALSE	FALSE			1	1	1	1	1	0.2146
1_154582169	1	154582169	T_C	-	single_cogn_Minus	ENSG00000160710	ADAR	protein_coding	adenosine deaminase, RNA specific	uncatalog		NONREP_novel	three_prime_utr	12	1497	0.00438521	FALSE	FALSE			0	0	0	0	0	0.6799
1_154582202	1	154582202	T_C	-	single_cogn_Minus	ENSG00000160710	ADAR	protein_coding	adenosine deaminase, RNA specific	uncatalog		NONREP_novel	three_prime_utr	11	1118	0.00505219	FALSE	FALSE			0	0	0	0	0	0.7948
1_154582203	1	154582203	T_C	-	single_cogn_Minus	ENSG00000160710	ADAR	protein_coding	adenosine deaminase, RNA specific	uncatalog		NONREP_novel	three_prime_utr	39	1119	0.0200124	FALSE	FALSE			0	0	0	0	0	0.7533
1_155544059	1	155544059	T_C	-	single_cogn_Minus	ENSG00000116539	ASH1L	protein_coding	ASH1 like histone lysine methyltransferase	ALU	AluJr4_653	ALU	intronic	13	30	0.433333	FALSE	FALSE			1	0	0	0	0	0.9996
1_155883922	1	155883922	A_G	+	single_cogn_Plus	ENSG00000132718	SYT11	protein_coding	synaptotagmin 11	uncatalog		NONREP_novel	three_prime_utr	124	366	0.299322	FALSE	FALSE			0	0	0	0	0	0.8481
1_160216880	1	160216880	T_C	-	single_cogn_Minus	ENSG00000132716	DCAF8	protein_coding	DDB1 and CUL4 associated factor 8	uncatalog		NONREP_novel	three_prime_utr	10	146	0.0236207	FALSE	FALSE	2	2	0	0	0	0	0	0.4011
1_163076207	1	163076207	A_G	+	single_cogn_Plus	ENSG00000117152	RGS4	protein_coding	regulator of G-protein signaling 4	uncatalog		NONREP_novel	three_prime_utr	20	294	0.0544266	FALSE	FALSE			0	0	0	0	0	0.4094
1_163076216	1	163076216	A_G	+	single_cogn_Plus	ENSG00000117152	RGS4	protein_coding	regulator of G-protein signaling 4	uncatalog		NONREP_novel	three_prime_utr	11	260	0.0271516	FALSE	FALSE			0	0	0	0	0	0.2281
1_168201998	1	168201998	A_G	+	single_cogn_Plus	ENSG00000143155	TIPRL	protein_coding	TOR signaling pathway regulator	uncatalog		NONREP_novel	three_prime_utr	13	560	0.0172872	FALSE	FALSE	1	1	0	0	0	0	0	0.9882
1_172611718	1	172611718	A_G	+	single_cogn_Plus	ENSG00000094975	SUCO	protein_coding	SUN domain containing ossification factor	uncatalog		NONREP_novel	three_prime_utr	38	333	0.0967605	FALSE	FALSE			0	0	0	0	0	0.78
1_173974088	1	173974088	T_C	-	single_cogn_Minus	ENSG00000135870	RC3H1	protein_coding	ring finger and CCCH-type domains 1	ALU	AluSq10_460	ALU	intronic	10	26	0.384615	FALSE	FALSE	1	1	1	1	0	0	0	0.7292
1_173974158	1	173974158	T_C	-	single_cogn_Minus	ENSG00000135870	RC3H1	protein_coding	ring finger and CCCH-type domains 1	ALU	AluSc8_1485	ALU	intronic	10	25	0.392	FALSE	FALSE	3	2	1	1	0	0	0	0.9965
1_174818910	1	174818910	A_G	+	single_cogn_Plus	ENSG00000152061	RABGAP1L	protein_coding	RAB GTPase activating protein 1 like	ALU	AluJb_1972	ALU	intronic	15	79	0.174264	FALSE	FALSE	2	2	1	1	1	1	0	0.994
1_174819103	1	174819103	A_G	+	single_cogn_Plus	ENSG00000152061	RABGAP1L	protein_coding	RAB GTPase activating protein 1 like	ALU	AluJr_1902	ALU	intronic	11	312	0.035153	FALSE	FALSE			1	1	1	0	0	0.4447
1_174819108	1	174819108	A_G	+	single_cogn_Plus	ENSG00000152061	RABGAP1L	protein_coding	RAB GTPase activating protein 1 like	ALU	AluJr_1902	ALU	intronic	19	322	0.057237	FALSE	FALSE	1	1	1	1	1	0	0	0.9379
1_176040396	1	176040396	T_C	-	single_cogn_Minus	ENSG00000143207	RFWD2	protein_coding	ring finger and WD repeat domain 2	ALU	AluJr4_1745	ALU	intronic	19	78	0.228734	FALSE	FALSE			1	1	0	0	0	0.7584
1_176040438	1	176040438	T_C	-	single_cogn_Minus	ENSG00000143207	RFWD2	protein_coding	ring finger and WD repeat domain 2	ALU	AluJr4_1745	ALU	intronic	14	45	0.311111	FALSE	FALSE			1	0	0	0	0	0.9496
1_176064765	1	176064765	T_C	-	single_cogn_Minus	ENSG00000143207	RFWD2	protein_coding	ring finger and WD repeat domain 2	ALU	AluJb_1690	ALU	intronic	11	91	0.104562	FALSE	FALSE	1	1	1	1	0	0	0	0.2153
1_183767169	1	183767169	A_G	+	single_cogn_Plus	ENSG00000143344	RGL1	protein_coding	ral guanine nucleotide dissociation stimulator like 1	ALU	AluJr_1952	ALU	intronic	13	91	0.138932	FALSE	FALSE	1	1	1	1	0	0	0	0.0523
1_183767217	1	183767217	A_G	+	single_cogn_Plus	ENSG00000143344	RGL1	protein_coding	ral guanine nucleotide dissociation stimulator like 1	ALU	AluJr_1952	ALU	intronic	10	65	0.139194	FALSE	FALSE			1	0	0	0	0	0.1936
1_203743785	1	203743785	A_G	+	single_cogn_Plus	ENSG00000058668	ATP2B4	protein_coding	ATPase plasma membrane Ca2+ transporting 4	uncatalog		NONREP_novel	three_prime_utr	11	588	0.0174945	FALSE	FALSE			0	0	0	0	0	0.0911
1_204671642	1	204671642	T_C	-	single_cogn_Minus	ENSG00000170382	LRRN2	protein_coding	leucine rich repeat neuronal 2	uncatalog		NONREP_novel	intronic	11	139	0.0296646	FALSE	FALSE			0	0	0	0	0	0.2881
1_205022694	1	205022694	A_G	+	single_cogn_Plus	ENSG00000163531	NFASC	protein_coding	neurofascin	uncatalog		NONREP_novel	three_prime_utr	13	1024	0.00696396	FALSE	FALSE			0	0	0	0	0	0.1353
1_227060859	1	227060859	T_C	-	single_cogn_Minus	ENSG00000143776	CDC42BPA	protein_coding	CDC42 binding protein kinase alpha	ALU	AluSz_2523	ALU	intronic	10	182	0.0503663	FALSE	FALSE	1	1	1	1	1	1	0	0.0809
1_227060860	1	227060860	T_C	-	single_cogn_Minus	ENSG00000143776	CDC42BPA	protein_coding	CDC42 binding protein kinase alpha	ALU	AluSz_2523	ALU	intronic	17	179	0.0834045	FALSE	FALSE	2	2	1	1	1	1	0	0.1644
1_227129224	1	227129224	T_C	-	single_cogn_Minus	ENSG00000143776	CDC42BPA	protein_coding	CDC42 binding protein kinase alpha	uncatalog		NONREP_novel	five_prime_utr	32	1038	0.0184548	FALSE	FALSE	6	4	0	0	0	0	0	0.1374
1_228148730	1	228148730	A_G	+	single_cogn_Plus	ENSG00000143774	GUK1	protein_coding	guanylate kinase 1	uncatalog		NONREP_novel	three_prime_utr	30	299	0.0906899	FALSE	FALSE			0	0	0	0	0	0.4146
1_234407427	1	234407427	T_C	-	single_cogn_Minus	ENSG00000059588	TARBP1	protein_coding	TAR (HIV-1) RNA binding protein 1	uncatalog	AluSz_2438	ALU_novel	exonic	20	798	0.0154564	FALSE	FALSE			0	0	0	0	0	0.8973
1_235463634	1	235463634	T_C	-	single_cogn_Minus	ENSG00000162885	B3GALNT2	protein_coding	beta-1,3-N-acetylgalactosaminyltransferase 2	ALU	AluSx3_2346	ALU	three_prime_utr	34	152	0.211389	FALSE	FALSE	1	1	1	1	1	0	0	0.4709
1_237047489	1	237047489	A_G	+	single_cogn_Plus	ENSG00000198626	RYR2	protein_coding	ryanodine receptor 2	uncatalog		NONREP_novel	intronic	13	271	0.0423827	FALSE	FALSE			0	0	0	0	0	0.5265
1_237154537	1	237154537	A_G	+	single_cogn_Plus	ENSG00000198626	RYR2	protein_coding	ryanodine receptor 2	REP	FLAM_A_789	REP	intronic	16	37	0.432432	FALSE	FALSE			1	1	0	0	0	0.8189
1_237154557	1	237154557	A_G	+	single_cogn_Plus	ENSG00000198626	RYR2	protein_coding	ryanodine receptor 2	REP	FLAM_A_789	REP	intronic	14	36	0.388889	FALSE	FALSE			1	1	1	0	0	0.7961
1_237154558	1	237154558	A_G	+	single_cogn_Plus	ENSG00000198626	RYR2	protein_coding	ryanodine receptor 2	REP	FLAM_A_789	REP	intronic	12	37	0.321321	FALSE	FALSE			1	1	1	0	0	0.0661
1_237154580	1	237154580	A_G	+	single_cogn_Plus	ENSG00000198626	RYR2	protein_coding	ryanodine receptor 2	REP	FLAM_A_789	REP	intronic	24	53	0.443507	FALSE	FALSE			1	1	0	0	0	0.6725
1_237154634	1	237154634	A_G	+	single_cogn_Plus	ENSG00000198626	RYR2	protein_coding	ryanodine receptor 2	REP	FLAM_A_789	REP	intronic	11	41	0.268293	FALSE	FALSE			1	1	0	0	0	0.7771
1_237339175	1	237339175	A_G	+	single_cogn_Plus	ENSG00000198626	RYR2	protein_coding	ryanodine receptor 2	NONREP		NONREP	intronic	16	30	0.533333	FALSE	FALSE			1	1	1	0	0	0.818
1_237339182	1	237339182	A_G	+	single_cogn_Plus	ENSG00000198626	RYR2	protein_coding	ryanodine receptor 2	NONREP		NONREP	intronic	12	30	0.4	FALSE	FALSE			1	1	1	0	0	0.9256
1_237339190	1	237339190	A_G	+	single_cogn_Plus	ENSG00000198626	RYR2	protein_coding	ryanodine receptor 2	NONREP		NONREP	intronic	11	29	0.37931	FALSE	FALSE			1	1	1	0	0	0.6848
1_237339256	1	237339256	A_G	+	single_cogn_Plus	ENSG00000198626	RYR2	protein_coding	ryanodine receptor 2	NONREP		NONREP	intronic	20	45	0.444444	FALSE	FALSE			1	1	1	0	0	0.7573
1_237339260	1	237339260	A_G	+	single_cogn_Plus	ENSG00000198626	RYR2	protein_coding	ryanodine receptor 2	NONREP		NONREP	intronic	24	45	0.533333	FALSE	FALSE			1	1	1	0	0	0.4967
1_237339277	1	237339277	A_G	+	single_cogn_Plus	ENSG00000198626	RYR2	protein_coding	ryanodine receptor 2	NONREP		NONREP	intronic	11	42	0.261905	FALSE	FALSE			1	1	0	0	0	0.1436
1_237339282	1	237339282	A_G	+	single_cogn_Plus	ENSG00000198626	RYR2	protein_coding	ryanodine receptor 2	NONREP		NONREP	intronic	13	39	0.333333	FALSE	FALSE			1	1	0	0	0	0.0546
1_237339283	1	237339283	A_G	+	single_cogn_Plus	ENSG00000198626	RYR2	protein_coding	ryanodine receptor 2	NONREP		NONREP	intronic	20	38	0.526316	FALSE	FALSE			1	1	1	0	0	0.3274
1_237339286	1	237339286	A_G	+	single_cogn_Plus	ENSG00000198626	RYR2	protein_coding	ryanodine receptor 2	NONREP		NONREP	intronic	11	40	0.255769	FALSE	FALSE			1	1	0	0	0	0.0652
1_237339294	1	237339294	A_G	+	single_cogn_Plus	ENSG00000198626	RYR2	protein_coding	ryanodine receptor 2	NONREP		NONREP	intronic	10	44	0.227273	FALSE	FALSE			1	1	0	0	0	0.4807
1_237339330	1	237339330	A_G	+	single_cogn_Plus	ENSG00000198626	RYR2	protein_coding	ryanodine receptor 2	NONREP		NONREP	intronic	21	46	0.456522	FALSE	FALSE			1	1	0	0	0	0.0786
1_237339334	1	237339334	A_G	+	single_cogn_Plus	ENSG00000198626	RYR2	protein_coding	ryanodine receptor 2	NONREP		NONREP	intronic	10	44	0.227273	FALSE	FALSE			1	1	0	0	0	0.696
1_237339340	1	237339340	A_G	+	single_cogn_Plus	ENSG00000198626	RYR2	protein_coding	ryanodine receptor 2	NONREP		NONREP	intronic	21	49	0.428571	FALSE	FALSE			1	1	0	0	0	0.9971
1_237345419	1	237345419	A_G	+	single_cogn_Plus	ENSG00000198626	RYR2	protein_coding	ryanodine receptor 2	ALU	AluJb_494	ALU	intronic	17	411	0.0323007	FALSE	FALSE			1	1	0	0	0	0.3183
1_237750096	1	237750096	A_G	+	single_cogn_Plus	ENSG00000198626	RYR2	protein_coding	ryanodine receptor 2	ALU	AluSx1_2347	ALU	intronic	14	190	0.0705263	FALSE	FALSE			1	1	1	0	0	0.1586
1_239599533	1	239599533	A_G	+	single_cogn_Plus	ENSG00000133019	CHRM3	protein_coding	cholinergic receptor muscarinic 3	uncatalog		NONREP_novel	intronic	11	43	0.252492	FALSE	FALSE			0	0	0	0	0	0.4292
1_240380481	1	240380481	A_G	+	single_cogn_Plus	ENSG00000155816	FMN2	protein_coding	formin 2	REP		REP	intronic	12	45	0.244444	FALSE	FALSE			1	1	0	0	0	0.9835
1_240380482	1	240380482	A_G	+	single_cogn_Plus	ENSG00000155816	FMN2	protein_coding	formin 2	REP		REP	intronic	27	45	0.577778	FALSE	FALSE	4	3	1	1	0	0	0	0.8264
1_240380503	1	240380503	A_G	+	single_cogn_Plus	ENSG00000155816	FMN2	protein_coding	formin 2	REP		REP	intronic	27	47	0.571712	FALSE	FALSE	5	3	1	1	0	0	0	0.8584
1_240380513	1	240380513	A_G	+	single_cogn_Plus	ENSG00000155816	FMN2	protein_coding	formin 2	REP		REP	intronic	13	54	0.238683	FALSE	FALSE	2	2	1	1	1	0	0	0.4464
1_240380519	1	240380519	A_G	+	single_cogn_Plus	ENSG00000155816	FMN2	protein_coding	formin 2	REP		REP	intronic	14	57	0.24386	FALSE	FALSE	5	3	1	1	1	0	0	0.5147
1_240842890	1	240842890	T_C	-	single_cogn_Minus	ENSG00000182901	RGS7	protein_coding	regulator of G-protein signaling 7	ALU	AluSq_2376	ALU	intronic	15	160	0.0897192	FALSE	FALSE			1	1	1	1	0	0.4875
1_240842900	1	240842900	T_C	-	single_cogn_Minus	ENSG00000182901	RGS7	protein_coding	regulator of G-protein signaling 7	uncatalog	AluSq_2376	ALU_novel	intronic	17	132	0.124003	FALSE	FALSE			0	0	0	0	0	0.0239
1_240842906	1	240842906	T_C	-	single_cogn_Minus	ENSG00000182901	RGS7	protein_coding	regulator of G-protein signaling 7	uncatalog	AluSq_2376	ALU_novel	intronic	11	107	0.0958543	FALSE	FALSE			0	0	0	0	0	0.2677
1_241148136	1	241148136	T_C	-	single_cogn_Minus	ENSG00000182901	RGS7	protein_coding	regulator of G-protein signaling 7	uncatalog	AluSz_2191	ALU_novel	intronic	16	223	0.0717489	FALSE	FALSE			0	0	0	0	0	0.0428
1_241174968	1	241174968	T_C	-	single_cogn_Minus	ENSG00000182901	RGS7	protein_coding	regulator of G-protein signaling 7	ALU	AluSx3_2066	ALU	intronic	14	226	0.0564211	FALSE	FALSE			1	0	0	0	0	0.2212
1_241174970	1	241174970	T_C	-	single_cogn_Minus	ENSG00000182901	RGS7	protein_coding	regulator of G-protein signaling 7	ALU	AluSx3_2066	ALU	intronic	53	216	0.228013	FALSE	FALSE	1	1	1	1	0	0	0	0.6299
1_241205145	1	241205145	T_C	-	single_cogn_Minus	ENSG00000182901	RGS7	protein_coding	regulator of G-protein signaling 7	uncatalog	AluSc_2214	ALU_novel	intronic	17	344	0.0448465	FALSE	FALSE	1	1	0	0	0	0	0	0.8371
1_241235625	1	241235625	T_C	-	single_cogn_Minus	ENSG00000182901	RGS7	protein_coding	regulator of G-protein signaling 7	uncatalog		NONREP_novel	intronic	13	853	0.00407088	FALSE	FALSE	4	3	0	0	0	0	0	0.9986
1_241235706	1	241235706	T_C	-	single_cogn_Minus	ENSG00000182901	RGS7	protein_coding	regulator of G-protein signaling 7	uncatalog		NONREP_novel	intronic	46	1215	0.019813	FALSE	FALSE			0	0	0	0	0	0.5163
1_241235738	1	241235738	T_C	-	single_cogn_Minus	ENSG00000182901	RGS7	protein_coding	regulator of G-protein signaling 7	uncatalog		NONREP_novel	intronic	10	1215	0.0042166	FALSE	FALSE			0	0	0	0	0	0.5599
1_241235758	1	241235758	T_C	-	single_cogn_Minus	ENSG00000182901	RGS7	protein_coding	regulator of G-protein signaling 7	uncatalog		NONREP_novel	intronic	13	1050	0.00780088	FALSE	FALSE			0	0	0	0	0	0.7621
1_241235766	1	241235766	T_C	-	single_cogn_Minus	ENSG00000182901	RGS7	protein_coding	regulator of G-protein signaling 7	NONREP		NONREP	intronic	110	920	0.0855325	FALSE	FALSE	1	1	1	1	1	1	1	0.5935
1_241235767	1	241235767	T_C	-	single_cogn_Minus	ENSG00000182901	RGS7	protein_coding	regulator of G-protein signaling 7	uncatalog		NONREP_novel	intronic	23	923	0.0152658	FALSE	FALSE			0	0	0	0	0	0.66
1_241235844	1	241235844	T_C	-	single_cogn_Minus	ENSG00000182901	RGS7	protein_coding	regulator of G-protein signaling 7	NONREP		NONREP	intronic	80	489	0.144002	FALSE	FALSE	1	1	1	1	1	1	1	0.0076
1_241235965	1	241235965	T_C	-	single_cogn_Minus	ENSG00000182901	RGS7	protein_coding	regulator of G-protein signaling 7	uncatalog		NONREP_novel	intronic	18	148	0.113751	FALSE	FALSE	1	1	0	0	0	0	0	0.2227
1_241250633	1	241250633	T_C	-	single_cogn_Minus	ENSG00000182901	RGS7	protein_coding	regulator of G-protein signaling 7	uncatalog		NONREP_novel	intronic	21	190	0.105454	FALSE	FALSE			0	0	0	0	0	0.5688
1_241250645	1	241250645	T_C	-	single_cogn_Minus	ENSG00000182901	RGS7	protein_coding	regulator of G-protein signaling 7	NONREP		NONREP	intronic	94	151	0.603568	FALSE	FALSE	11	4	1	1	1	0	0	0.2356
1_241250802	1	241250802	T_C	-	single_cogn_Minus	ENSG00000182901	RGS7	protein_coding	regulator of G-protein signaling 7	NONREP		NONREP	intronic	15	77	0.173341	FALSE	FALSE			1	1	1	0	0	0.9537
1_241250882	1	241250882	T_C	-	single_cogn_Minus	ENSG00000182901	RGS7	protein_coding	regulator of G-protein signaling 7	NONREP		NONREP	intronic	12	20	0.6	FALSE	FALSE	8	3	1	1	1	0	0	0.3683
1_241250887	1	241250887	T_C	-	single_cogn_Minus	ENSG00000182901	RGS7	protein_coding	regulator of G-protein signaling 7	REP		REP	intronic	12	18	0.666667	FALSE	FALSE	9	4	1	1	1	0	0	0.7541
1_241250962	1	241250962	T_C	-	single_cogn_Minus	ENSG00000182901	RGS7	protein_coding	regulator of G-protein signaling 7	REP		REP	intronic	18	23	0.782609	FALSE	FALSE	9	4	1	1	1	0	0	0.5549
1_241250969	1	241250969	T_C	-	single_cogn_Minus	ENSG00000182901	RGS7	protein_coding	regulator of G-protein signaling 7	REP		REP	intronic	10	24	0.416667	FALSE	FALSE	8	4	1	1	1	0	0	0.6063
1_244420958	1	244420958	T_C	-	single_cogn_Minus	ENSG00000035687	ADSS	protein_coding	adenylosuccinate synthase	ALU	AluJb_1387	ALU	intronic	80	87	0.847826	FALSE	FALSE			1	1	1	1	1	0.4852
1_244420964	1	244420964	T_C	-	single_cogn_Minus	ENSG00000035687	ADSS	protein_coding	adenylosuccinate synthase	ALU	AluJb_1387	ALU	intronic	32	60	0.363636	FALSE	FALSE			1	1	1	1	0	0.9731
1_246174053	1	246174053	T_C	-	single_cogn_Minus	ENSG00000185420	SMYD3	protein_coding	SET and MYND domain containing 3	ALU	AluJr_1753	ALU	intronic	11	63	0.174603	FALSE	FALSE			1	1	1	0	0	0.3146
1_246174056	1	246174056	T_C	-	single_cogn_Minus	ENSG00000185420	SMYD3	protein_coding	SET and MYND domain containing 3	ALU	AluJr_1753	ALU	intronic	40	56	0.711747	FALSE	FALSE	2	2	1	1	1	0	0	0.7719
11_33403518	11	33403518	A_G	+	single_cogn_Plus	ENSG00000254537	AL137161.1	processed_pseudogene	NULL	uncatalog		NONREP_novel		186	421	0.409861	FALSE	FALSE			0	0	0	0	0	0.1853
11_49584190	11	49584190	A_G	+	single_cogn_Plus	ENSG00000205035	AC136759.1	transcribed_unprocessed_pseudogene	NULL	uncatalog	AluJo_765	ALU_novel		14	145	0.0885057	FALSE	FALSE			0	0	0	0	0	0.6155
11_49584191	11	49584191	A_G	+	single_cogn_Plus	ENSG00000205035	AC136759.1	transcribed_unprocessed_pseudogene	NULL	uncatalog	AluJo_765	ALU_novel		14	145	0.0849425	FALSE	FALSE			0	0	0	0	0	0.6079
11_65500195	11	65500195	A_G	+	single_cogn_Plus	ENSG00000251562	MALAT1	lincRNA	metastasis associated lung adenocarcinoma transcript 1 (non-protein coding)	uncatalog		NONREP_novel		14	1108	0.00614647	FALSE	FALSE	1	1	0	0	0	0	0	0.6387
11_65500627	11	65500627	A_G	+	single_cogn_Plus	ENSG00000251562	MALAT1	lincRNA	metastasis associated lung adenocarcinoma transcript 1 (non-protein coding)	uncatalog		NONREP_novel		52	2179	0.00983004	FALSE	FALSE			0	0	0	0	0	0.3128
11_65500636	11	65500636	A_G	+	single_cogn_Plus	ENSG00000251562	MALAT1	lincRNA	metastasis associated lung adenocarcinoma transcript 1 (non-protein coding)	uncatalog		NONREP_novel		30	1991	0.00685823	FALSE	FALSE			0	0	0	0	0	0.842
11_65500686	11	65500686	A_G	+	single_cogn_Plus	ENSG00000251562	MALAT1	lincRNA	metastasis associated lung adenocarcinoma transcript 1 (non-protein coding)	uncatalog		NONREP_novel		12	1882	0.00272037	FALSE	FALSE			0	0	0	0	0	0.8828
11_65503081	11	65503081	A_G	+	single_cogn_Plus	ENSG00000251562	MALAT1	lincRNA	metastasis associated lung adenocarcinoma transcript 1 (non-protein coding)	uncatalog		NONREP_novel		44	1040	0.0293561	FALSE	FALSE			0	0	0	0	0	0.1201
11_65503709	11	65503709	A_G	+	single_cogn_Plus	ENSG00000251562	MALAT1	lincRNA	metastasis associated lung adenocarcinoma transcript 1 (non-protein coding)	uncatalog		NONREP_novel		10	2304	0.00140744	FALSE	FALSE			0	0	0	0	0	0.7631
11_65503779	11	65503779	A_G	+	single_cogn_Plus	ENSG00000251562	MALAT1	lincRNA	metastasis associated lung adenocarcinoma transcript 1 (non-protein coding)	uncatalog		NONREP_novel		21	2213	0.00364346	FALSE	FALSE			0	0	0	0	0	0.3127
11_65505714	11	65505714	A_G	+	single_cogn_Plus	ENSG00000251562	MALAT1	lincRNA	metastasis associated lung adenocarcinoma transcript 1 (non-protein coding)	uncatalog		NONREP_novel		13	1800	0.00254617	FALSE	FALSE			0	0	0	0	0	0.7939
11_65505741	11	65505741	A_G	+	single_cogn_Plus	ENSG00000251562	MALAT1	lincRNA	metastasis associated lung adenocarcinoma transcript 1 (non-protein coding)	uncatalog		NONREP_novel		29	1561	0.00849035	FALSE	FALSE			0	0	0	0	0	0.4104
11_65505742	11	65505742	A_G	+	single_cogn_Plus	ENSG00000251562	MALAT1	lincRNA	metastasis associated lung adenocarcinoma transcript 1 (non-protein coding)	uncatalog		NONREP_novel		12	1538	0.00429289	FALSE	FALSE			0	0	0	0	0	0.4278
11_73401012	11	73401012	T_C	-	single_cogn_Minus	ENSG00000054965	FAM168A	protein_coding	family with sequence similarity 168 member A	uncatalog		NONREP_novel	three_prime_utr	56	396	0.118971	FALSE	FALSE			0	0	0	0	0	0.0591
11_73401023	11	73401023	T_C	-	single_cogn_Minus	ENSG00000054965	FAM168A	protein_coding	family with sequence similarity 168 member A	uncatalog		NONREP_novel	three_prime_utr	54	305	0.136331	FALSE	FALSE			0	0	0	0	0	0.8666
11_83204924	11	83204924	A_G	+	single_cogn_Plus	ENSG00000137494	ANKRD42	protein_coding	ankyrin repeat domain 42	uncatalog		NONREP_novel	intronic	20	107	0.184528	FALSE	FALSE	3	2	0	0	0	0	0	0.8069
11_83768511	11	83768511	T_C	-	single_cogn_Minus	ENSG00000150672	DLG2	protein_coding	discs large MAGUK scaffold protein 2	uncatalog		NONREP_novel	intronic	31	256	0.0960934	FALSE	FALSE			0	0	0	0	0	0.4898
11_84221070	11	84221070	T_C	-	single_cogn_Minus	ENSG00000150672	DLG2	protein_coding	discs large MAGUK scaffold protein 2	uncatalog	AluJb_1569	ALU_novel	intronic	25	125	0.188498	FALSE	FALSE			0	0	0	0	0	0.7945
11_105944337	11	105944337	A_G	+	single_cogn_Plus	ENSG00000152578	GRIA4	protein_coding	glutamate ionotropic receptor AMPA type subunit 4	uncatalog		NONREP_novel	intronic	13	235	0.0511193	FALSE	FALSE	2	1	0	0	0	0	0	0.8153
11_105944341	11	105944341	A_G	+	single_cogn_Plus	ENSG00000152578	GRIA4	protein_coding	glutamate ionotropic receptor AMPA type subunit 4	uncatalog		NONREP_novel	intronic	10	238	0.0389223	FALSE	FALSE	2	2	0	0	0	0	0	0.8162
11_118535727	11	118535727	A_G	+	single_cogn_Plus	ENSG00000149582	TMEM25	protein_coding	transmembrane protein 25	uncatalog		NONREP_novel	three_prime_utr	13	605	0.0140707	FALSE	FALSE			0	0	0	0	0	0.8465
11_123629351	11	123629351	T_C	-	single_cogn_Minus	ENSG00000166257	SCN3B	protein_coding	sodium voltage-gated channel beta subunit 3	uncatalog		NONREP_novel	three_prime_utr	156	995	0.0973526	FALSE	FALSE			0	0	0	0	0	0.9129
11_126970338	11	126970338	T_C	-	single_cogn_Minus	ENSG00000149571	KIRREL3	protein_coding	kin of IRRE like 3 (Drosophila)	uncatalog		NONREP_novel	intronic	17	431	0.025594	FALSE	FALSE			0	0	0	0	0	0.1844
11_132497358	11	132497358	T_C	-	single_cogn_Minus	ENSG00000183715	OPCML	protein_coding	opioid binding protein/cell adhesion molecule like	uncatalog		NONREP_novel	intronic	14	96	0.145833	FALSE	FALSE			0	0	0	0	0	0.6868
11_132497362	11	132497362	T_C	-	single_cogn_Minus	ENSG00000183715	OPCML	protein_coding	opioid binding protein/cell adhesion molecule like	uncatalog		NONREP_novel	intronic	10	99	0.0978203	FALSE	FALSE	1	1	0	0	0	0	0	0.5421
11_132497400	11	132497400	T_C	-	single_cogn_Minus	ENSG00000183715	OPCML	protein_coding	opioid binding protein/cell adhesion molecule like	uncatalog		NONREP_novel	intronic	10	45	0.222222	FALSE	FALSE	1	1	0	0	0	0	0	0.843
11_133098418	11	133098418	T_C	-	single_cogn_Minus	ENSG00000183715	OPCML	protein_coding	opioid binding protein/cell adhesion molecule like	uncatalog	AluY_2404	ALU_novel	intronic	10	56	0.164286	FALSE	FALSE	3	2	0	0	0	0	0	0.8552
11_133176434	11	133176434	T_C	-	single_cogn_Minus	ENSG00000183715	OPCML	protein_coding	opioid binding protein/cell adhesion molecule like	uncatalog		NONREP_novel	intronic	10	371	0.0255355	FALSE	FALSE			0	0	0	0	0	0.4186
11_133258001	11	133258001	T_C	-	single_cogn_Minus	ENSG00000183715	OPCML	protein_coding	opioid binding protein/cell adhesion molecule like	uncatalog		NONREP_novel	intronic	10	409	0.0208406	FALSE	FALSE			0	0	0	0	0	0.7874
11_133433064	11	133433064	T_C	-	single_cogn_Minus	ENSG00000183715	OPCML	protein_coding	opioid binding protein/cell adhesion molecule like	uncatalog		NONREP_novel	intronic	10	57	0.175439	FALSE	FALSE	1	1	0	0	0	0	0	0.9685
11_133495876	11	133495876	T_C	-	single_cogn_Minus	ENSG00000183715	OPCML	protein_coding	opioid binding protein/cell adhesion molecule like	uncatalog		NONREP_novel	intronic	27	146	0.166733	FALSE	FALSE	1	1	0	0	0	0	0	0.7696
11_133495877	11	133495877	T_C	-	single_cogn_Minus	ENSG00000183715	OPCML	protein_coding	opioid binding protein/cell adhesion molecule like	uncatalog		NONREP_novel	intronic	11	152	0.062359	FALSE	FALSE			0	0	0	0	0	0.9841
11_133495879	11	133495879	T_C	-	single_cogn_Minus	ENSG00000183715	OPCML	protein_coding	opioid binding protein/cell adhesion molecule like	uncatalog		NONREP_novel	intronic	18	148	0.109266	FALSE	FALSE			0	0	0	0	0	0.6522
11_133495902	11	133495902	T_C	-	single_cogn_Minus	ENSG00000183715	OPCML	protein_coding	opioid binding protein/cell adhesion molecule like	uncatalog		NONREP_novel	intronic	16	128	0.115459	FALSE	FALSE			0	0	0	0	0	0.4301
11_133915719	11	133915719	T_C	-	single_cogn_Minus	ENSG00000080854	IGSF9B	protein_coding	immunoglobulin superfamily member 9B	uncatalog		NONREP_novel	intronic	10	75	0.133333	FALSE	FALSE	1	1	0	0	0	0	0	0.4227
21_25945639	21	25945639	T_C	-	single_cogn_Minus	ENSG00000142192	APP	protein_coding	amyloid beta precursor protein	uncatalog		NONREP_novel	three_prime_utr	17	107	0.14537	FALSE	FALSE			0	0	0	0	0	0.8064
21_25945641	21	25945641	T_C	-	single_cogn_Minus	ENSG00000142192	APP	protein_coding	amyloid beta precursor protein	uncatalog		NONREP_novel	three_prime_utr	17	106	0.147145	FALSE	FALSE			0	0	0	0	0	0.5386
21_37165616	21	37165616	A_G	+	single_cogn_Plus	ENSG00000182670	TTC3	protein_coding	tetratricopeptide repeat domain 3	uncatalog		NONREP_novel	exonic	12	1079	0.0067466	FALSE	FALSE			0	0	0	0	0	0.0869
21_37165750	21	37165750	A_G	+	single_cogn_Plus	ENSG00000182670	TTC3	protein_coding	tetratricopeptide repeat domain 3	uncatalog		NONREP_novel	exonic	23	713	0.017494	FALSE	FALSE			0	0	0	0	0	0.8383
21_37202990	21	37202990	A_G	+	single_cogn_Plus	ENSG00000182670	TTC3	protein_coding	tetratricopeptide repeat domain 3	uncatalog		NONREP_novel	three_prime_utr	20	1513	0.00597495	FALSE	FALSE			0	0	0	0	0	0.6635
21_37202991	21	37202991	A_G	+	single_cogn_Plus	ENSG00000182670	TTC3	protein_coding	tetratricopeptide repeat domain 3	uncatalog		NONREP_novel	three_prime_utr	22	1519	0.00727796	FALSE	FALSE			0	0	0	0	0	0.4154
21_37202992	21	37202992	A_G	+	single_cogn_Plus	ENSG00000182670	TTC3	protein_coding	tetratricopeptide repeat domain 3	uncatalog		NONREP_novel	three_prime_utr	22	1528	0.00751916	FALSE	FALSE			0	0	0	0	0	0.4728
21_40139041	21	40139041	T_C	-	single_cogn_Minus	ENSG00000171587	DSCAM	protein_coding	DS cell adhesion molecule	uncatalog		NONREP_novel	intronic	25	200	0.0688249	FALSE	FALSE			0	0	0	0	0	0.318
1_1483072	1	1483072	A_G	+	single_cogn_Plus	ENSG00000160072	ATAD3B	protein_coding	ATPase family, AAA domain containing 3B	ALU	AluSc8_1615	ALU	intronic	17	105	0.161905	FALSE	FALSE			1	1	1	1	0	0.4884
1_1483075	1	1483075	A_G	+	single_cogn_Plus	ENSG00000160072	ATAD3B	protein_coding	ATPase family, AAA domain containing 3B	ALU	AluSc8_1615	ALU	intronic	44	111	0.386854	FALSE	FALSE			1	1	1	1	1	0.9024
1_1785364	1	1785364	T_C	-	single_cogn_Minus	ENSG00000078369	GNB1	protein_coding	G protein subunit beta 1	uncatalog		NONREP_novel	three_prime_utr	20	1346	0.0079373	FALSE	FALSE			0	0	0	0	0	0.8575
1_1785473	1	1785473	T_C	-	single_cogn_Minus	ENSG00000078369	GNB1	protein_coding	G protein subunit beta 1	uncatalog		NONREP_novel	three_prime_utr	27	587	0.0281903	FALSE	FALSE	2	2	0	0	0	0	0	0.9736
1_6264351	1	6264351	T_C	-	single_cogn_Minus	ENSG00000097021	ACOT7	protein_coding	acyl-CoA thioesterase 7	uncatalog		NONREP_novel	three_prime_utr	17	896	0.00809941	FALSE	FALSE			0	0	0	0	0	0.9499
1_6264365	1	6264365	T_C	-	single_cogn_Minus	ENSG00000097021	ACOT7	protein_coding	acyl-CoA thioesterase 7	uncatalog		NONREP_novel	three_prime_utr	21	801	0.0203989	FALSE	FALSE			0	0	0	0	0	0.9982
1_6264386	1	6264386	T_C	-	single_cogn_Minus	ENSG00000097021	ACOT7	protein_coding	acyl-CoA thioesterase 7	uncatalog		NONREP_novel	three_prime_utr	10	569	0.0128548	FALSE	FALSE			0	0	0	0	0	0.6394
1_8400533	1	8400533	T_C	-	single_cogn_Minus	ENSG00000142599	RERE	protein_coding	arginine-glutamic acid dipeptide repeats	ALU	AluJr_1764	ALU	intronic	18	54	0.183838	FALSE	FALSE	10	3	1	1	1	0	0	0.8713
1_10349385	1	10349385	A_G	+	single_cogn_Plus	ENSG00000054523	KIF1B	protein_coding	kinesin family member 1B	ALU	AluSz6_1938	ALU	intronic	28	146	0.190214	FALSE	FALSE	1	1	1	1	1	0	0	0.9545
1_10349405	1	10349405	A_G	+	single_cogn_Plus	ENSG00000054523	KIF1B	protein_coding	kinesin family member 1B	ALU	AluSz6_1938	ALU	intronic	13	153	0.081855	TRUE	FALSE	2	2	1	1	1	0	0	0.959
1_13917712	1	13917712	A_G	+	single_cogn_Plus	ENSG00000189337	KAZN	protein_coding	kazrin, periplakin interacting protein	uncatalog	AluJb_1858	ALU_novel	intronic	18	446	0.0309068	FALSE	FALSE			0	0	0	0	0	0.9995
1_13917722	1	13917722	A_G	+	single_cogn_Plus	ENSG00000189337	KAZN	protein_coding	kazrin, periplakin interacting protein	uncatalog	AluJb_1858	ALU_novel	intronic	16	473	0.0284723	FALSE	FALSE			0	0	0	0	0	0.9516
1_14403049	1	14403049	A_G	+	single_cogn_Plus	ENSG00000189337	KAZN	protein_coding	kazrin, periplakin interacting protein	ALU	AluSz6_2143	ALU	intronic	10	23	0.42236	FALSE	FALSE	4	3	1	1	0	0	0	0.054
1_14403100	1	14403100	A_G	+	single_cogn_Plus	ENSG00000189337	KAZN	protein_coding	kazrin, periplakin interacting protein	ALU	AluSz6_2143	ALU	intronic	21	66	0.299784	FALSE	FALSE	4	2	1	1	0	0	0	0.1806
1_14697109	1	14697109	A_G	+	single_cogn_Plus	ENSG00000189337	KAZN	protein_coding	kazrin, periplakin interacting protein	uncatalog	AluJo_1687	ALU_novel	intronic	12	343	0.0273568	FALSE	FALSE			0	0	0	0	0	0.9633
1_14782530	1	14782530	A_G	+	single_cogn_Plus	ENSG00000189337	KAZN	protein_coding	kazrin, periplakin interacting protein	ALU	AluSx_2340	ALU	intronic	23	600	0.0301978	FALSE	FALSE			1	1	1	1	0	0.8178
1_14782555	1	14782555	A_G	+	single_cogn_Plus	ENSG00000189337	KAZN	protein_coding	kazrin, periplakin interacting protein	uncatalog	AluSx_2340	ALU_novel	intronic	10	292	0.0273542	FALSE	FALSE			0	0	0	0	0	0.1772
1_16497225	1	16497225	T_C	-	single_cogn_Minus	ENSG00000080947	CROCCP3	transcribed_unprocessed_pseudogene	ciliary rootlet coiled-coil, rootletin pseudogene 3	ALU	AluSz_2327	ALU		30	211	0.137275	FALSE	FALSE			1	1	1	0	0	0.6614
1_16497249	1	16497249	T_C	-	single_cogn_Minus	ENSG00000080947	CROCCP3	transcribed_unprocessed_pseudogene	ciliary rootlet coiled-coil, rootletin pseudogene 3	ALU	AluSz_2327	ALU		50	178	0.26289	FALSE	FALSE	1	1	1	1	1	0	0	0.9657
1_16497252	1	16497252	T_C	-	single_cogn_Minus	ENSG00000080947	CROCCP3	transcribed_unprocessed_pseudogene	ciliary rootlet coiled-coil, rootletin pseudogene 3	uncatalog	AluSz_2327	ALU_novel		12	170	0.0629724	FALSE	FALSE			0	0	0	0	0	0.9328
1_16635149	1	16635149	T_C	-	single_cogn_Minus	ENSG00000215908	CROCCP2	transcribed_unprocessed_pseudogene	ciliary rootlet coiled-coil, rootletin pseudogene 2	ALU	AluSx_2296	ALU		14	266	0.0497039	FALSE	FALSE	1	1	1	1	1	1	1	0.8659
1_20483003	1	20483003	T_C	-	single_cogn_Minus	ENSG00000162545	CAMK2N1	protein_coding	calcium/calmodulin dependent protein kinase II inhibitor 1	uncatalog		NONREP_novel	three_prime_utr	67	1490	0.0237196	FALSE	FALSE			0	0	0	0	0	0.6724
1_20483631	1	20483631	T_C	-	single_cogn_Minus	ENSG00000162545	CAMK2N1	protein_coding	calcium/calmodulin dependent protein kinase II inhibitor 1	uncatalog		NONREP_novel	three_prime_utr	13	902	0.00801472	FALSE	FALSE			0	0	0	0	0	0.4546
1_20844577	1	20844577	T_C	-	single_cogn_Minus	ENSG00000075151	EIF4G3	protein_coding	eukaryotic translation initiation factor 4 gamma 3	ALU	AluSq2_2274	ALU	intronic	14	67	0.208955	FALSE	FALSE			1	1	0	0	0	0.2485
1_20855299	1	20855299	T_C	-	single_cogn_Minus	ENSG00000075151	EIF4G3	protein_coding	eukaryotic translation initiation factor 4 gamma 3	NONREP		NONREP	intronic	18	48	0.352548	FALSE	FALSE	11	4	1	1	0	0	0	0.6181
1_20989299	1	20989299	T_C	-	single_cogn_Minus	ENSG00000075151	EIF4G3	protein_coding	eukaryotic translation initiation factor 4 gamma 3	ALU	AluSq_2336	ALU	intronic	16	75	0.199195	FALSE	FALSE			1	0	0	0	0	0.6302
1_20989376	1	20989376	T_C	-	single_cogn_Minus	ENSG00000075151	EIF4G3	protein_coding	eukaryotic translation initiation factor 4 gamma 3	uncatalog	AluSq_2336	ALU_novel	intronic	10	50	0.2	FALSE	FALSE			0	0	0	0	0	0.5436
1_20989474	1	20989474	T_C	-	single_cogn_Minus	ENSG00000075151	EIF4G3	protein_coding	eukaryotic translation initiation factor 4 gamma 3	ALU	AluSq_2336	ALU	intronic	13	78	0.15812	FALSE	FALSE			1	0	0	0	0	0.2583
1_21003094	1	21003094	T_C	-	single_cogn_Minus	ENSG00000075151	EIF4G3	protein_coding	eukaryotic translation initiation factor 4 gamma 3	ALU	AluJr_1567	ALU	intronic	15	101	0.148515	FALSE	FALSE	1	1	1	1	0	0	0	0.5422
1_21173232	1	21173232	T_C	-	single_cogn_Minus	ENSG00000075151	EIF4G3	protein_coding	eukaryotic translation initiation factor 4 gamma 3	ALU	AluSx_1452	ALU	intronic	10	56	0.178571	FALSE	FALSE			1	0	0	0	0	0.9996
1_25437404	1	25437404	A_G	+	single_cogn_Plus	ENSG00000204178	TMEM57	protein_coding	transmembrane protein 57	ALU	AluJo_1596	ALU	intronic	20	46	0.418478	FALSE	FALSE	4	2	1	1	1	0	0	0.227
1_30933017	1	30933017	T_C	-	single_cogn_Minus	ENSG00000134644	PUM1	protein_coding	pumilio RNA binding family member 1	uncatalog		NONREP_novel	three_prime_utr	18	295	0.0527973	FALSE	FALSE			0	0	0	0	0	0.8752
1_30933018	1	30933018	T_C	-	single_cogn_Minus	ENSG00000134644	PUM1	protein_coding	pumilio RNA binding family member 1	uncatalog		NONREP_novel	three_prime_utr	18	290	0.0538609	FALSE	FALSE			0	0	0	0	0	0.9852
1_32616852	1	32616852	T_C	-	single_cogn_Minus	ENSG00000176261	ZBTB8OS	protein_coding	zinc finger and BTB domain containing 8 opposite strand	ALU	AluJb_1592	ALU	intronic	18	118	0.146764	FALSE	FALSE			1	0	0	0	0	0.9698
1_32616856	1	32616856	T_C	-	single_cogn_Minus	ENSG00000176261	ZBTB8OS	protein_coding	zinc finger and BTB domain containing 8 opposite strand	ALU	AluJb_1592	ALU	intronic	12	109	0.110092	FALSE	FALSE			1	0	0	0	0	0.6426
1_32616872	1	32616872	T_C	-	single_cogn_Minus	ENSG00000176261	ZBTB8OS	protein_coding	zinc finger and BTB domain containing 8 opposite strand	ALU	AluJb_1592	ALU	intronic	14	89	0.151311	FALSE	FALSE			1	0	0	0	0	0.1474
1_32616889	1	32616889	T_C	-	single_cogn_Minus	ENSG00000176261	ZBTB8OS	protein_coding	zinc finger and BTB domain containing 8 opposite strand	ALU	AluJb_1592	ALU	intronic	16	91	0.167582	FALSE	FALSE	1	1	1	0	0	0	0	0.7899
1_32616913	1	32616913	T_C	-	single_cogn_Minus	ENSG00000176261	ZBTB8OS	protein_coding	zinc finger and BTB domain containing 8 opposite strand	ALU	AluJb_1592	ALU	intronic	10	79	0.126582	FALSE	FALSE			1	0	0	0	0	0.3706
1_32616919	1	32616919	T_C	-	single_cogn_Minus	ENSG00000176261	ZBTB8OS	protein_coding	zinc finger and BTB domain containing 8 opposite strand	ALU	AluJb_1592	ALU	intronic	10	72	0.130787	FALSE	FALSE			1	1	0	0	0	0.4737
1_32616932	1	32616932	T_C	-	single_cogn_Minus	ENSG00000176261	ZBTB8OS	protein_coding	zinc finger and BTB domain containing 8 opposite strand	ALU	AluJb_1592	ALU	intronic	28	53	0.514485	FALSE	FALSE	3	2	1	1	0	0	0	0.364
1_32643485	1	32643485	T_C	-	single_cogn_Minus	ENSG00000176261	ZBTB8OS	protein_coding	zinc finger and BTB domain containing 8 opposite strand	ALU	AluJb_1220	ALU	intronic	10	98	0.10119	FALSE	FALSE			1	1	1	1	0	0.8291
1_32644587	1	32644587	T_C	-	single_cogn_Minus	ENSG00000176261	ZBTB8OS	protein_coding	zinc finger and BTB domain containing 8 opposite strand	ALU	AluJo_1564	ALU	intronic	45	387	0.104416	FALSE	FALSE	1	1	1	1	1	1	0	0.6242
1_32644616	1	32644616	T_C	-	single_cogn_Minus	ENSG00000176261	ZBTB8OS	protein_coding	zinc finger and BTB domain containing 8 opposite strand	ALU	AluJo_1564	ALU	intronic	10	360	0.0277778	FALSE	FALSE			1	1	0	0	0	0.3541
1_35528198	1	35528198	T_C	-	single_cogn_Minus	ENSG00000142687	KIAA0319L	protein_coding	KIAA0319 like	uncatalog	AluJr4_1806	ALU_novel	intronic	10	63	0.146592	FALSE	FALSE	2	2	0	0	0	0	0	0.0989
1_35566361	1	35566361	A_G	+	single_cogn_Plus	ENSG00000020129	NCDN	protein_coding	neurochondrin	uncatalog		NONREP_novel	three_prime_utr	17	709	0.0173622	FALSE	FALSE			0	0	0	0	0	0.4329
1_35566489	1	35566489	A_G	+	single_cogn_Plus	ENSG00000020129	NCDN	protein_coding	neurochondrin	uncatalog		NONREP_novel	three_prime_utr	21	1127	0.00868215	FALSE	FALSE	2	1	0	0	0	0	0	0.6526
1_35634864	1	35634864	T_C	-	single_cogn_Minus	ENSG00000126067	PSMB2	protein_coding	proteasome subunit beta 2	ALU	AluJr4_1692	ALU	intronic	22	77	0.279221	FALSE	FALSE			1	0	0	0	0	0.9867
1_39097629	1	39097629	A_G	+	single_cogn_Plus	ENSG00000127603	MACF1	protein_coding	microtubule-actin crosslinking factor 1	ALU	AluJb_1894	ALU	intronic	11	31	0.354839	FALSE	FALSE			1	1	1	0	0	0.88
1_39097637	1	39097637	A_G	+	single_cogn_Plus	ENSG00000127603	MACF1	protein_coding	microtubule-actin crosslinking factor 1	ALU	AluJb_1894	ALU	intronic	16	31	0.516129	FALSE	FALSE			1	1	1	0	0	0.3673
1_39112876	1	39112876	A_G	+	single_cogn_Plus	ENSG00000127603	MACF1	protein_coding	microtubule-actin crosslinking factor 1	REP	FRAM_933	REP	intronic	35	75	0.451787	FALSE	FALSE	2	2	1	1	1	0	0	0.5977
1_39112886	1	39112886	A_G	+	single_cogn_Plus	ENSG00000127603	MACF1	protein_coding	microtubule-actin crosslinking factor 1	REP	FRAM_933	REP	intronic	17	73	0.220981	FALSE	FALSE			1	1	1	0	0	0.8804
1_39112889	1	39112889	A_G	+	single_cogn_Plus	ENSG00000127603	MACF1	protein_coding	microtubule-actin crosslinking factor 1	REP	FRAM_933	REP	intronic	14	74	0.189189	FALSE	FALSE			1	1	1	0	0	0.7278
1_39112908	1	39112908	A_G	+	single_cogn_Plus	ENSG00000127603	MACF1	protein_coding	microtubule-actin crosslinking factor 1	REP	FRAM_933	REP	intronic	20	121	0.156828	FALSE	FALSE	2	1	1	1	1	0	0	0.9671
1_39112922	1	39112922	A_G	+	single_cogn_Plus	ENSG00000127603	MACF1	protein_coding	microtubule-actin crosslinking factor 1	REP	FRAM_933	REP	intronic	16	163	0.087888	FALSE	FALSE			1	1	0	0	0	0.7127
1_39112954	1	39112954	A_G	+	single_cogn_Plus	ENSG00000127603	MACF1	protein_coding	microtubule-actin crosslinking factor 1	REP	FRAM_933	REP	intronic	23	172	0.114714	FALSE	FALSE	1	1	1	1	1	0	0	0.185
1_39112958	1	39112958	A_G	+	single_cogn_Plus	ENSG00000127603	MACF1	protein_coding	microtubule-actin crosslinking factor 1	REP	FRAM_933	REP	intronic	40	159	0.215184	FALSE	FALSE	1	1	1	1	1	0	0	0.3356
1_39140030	1	39140030	A_G	+	single_cogn_Plus	ENSG00000127603	MACF1	protein_coding	microtubule-actin crosslinking factor 1	ALU	AluJr_1851	ALU	intronic	11	31	0.354839	FALSE	FALSE			1	1	0	0	0	0.9985
1_39140033	1	39140033	A_G	+	single_cogn_Plus	ENSG00000127603	MACF1	protein_coding	microtubule-actin crosslinking factor 1	ALU	AluJr_1851	ALU	intronic	16	37	0.275862	FALSE	FALSE			1	1	1	0	0	0.9995
1_40224952	1	40224952	A_G	+	single_cogn_Plus	ENSG00000117000	RLF	protein_coding	rearranged L-myc fusion	ALU	AluSq2_2147	ALU	intronic	16	87	0.183908	FALSE	FALSE			1	1	1	0	0	0.2804
1_41786823	1	41786823	T_C	-	single_cogn_Minus	ENSG00000127124	HIVEP3	protein_coding	human immunodeficiency virus type I enhancer binding protein 3	ALU	AluSz_2243	ALU	intronic	40	129	0.299294	FALSE	FALSE	1	1	1	0	0	0	0	0.084
1_41786889	1	41786889	T_C	-	single_cogn_Minus	ENSG00000127124	HIVEP3	protein_coding	human immunodeficiency virus type I enhancer binding protein 3	ALU	AluSz_2243	ALU	intronic	16	63	0.25291	FALSE	FALSE			1	1	0	0	0	0.0963
1_41786896	1	41786896	T_C	-	single_cogn_Minus	ENSG00000127124	HIVEP3	protein_coding	human immunodeficiency virus type I enhancer binding protein 3	ALU	AluSz_2243	ALU	intronic	18	56	0.318452	FALSE	FALSE			1	1	0	0	0	0.9043
1_48814666	1	48814666	T_C	-	single_cogn_Minus	ENSG00000186094	AGBL4	protein_coding	ATP/GTP binding protein like 4	uncatalog		NONREP_novel	intronic	29	238	0.104915	FALSE	FALSE			0	0	0	0	0	0.0483
1_48814712	1	48814712	T_C	-	single_cogn_Minus	ENSG00000186094	AGBL4	protein_coding	ATP/GTP binding protein like 4	uncatalog		NONREP_novel	intronic	19	191	0.0869685	FALSE	FALSE			0	0	0	0	0	0.6443
1_48814725	1	48814725	T_C	-	single_cogn_Minus	ENSG00000186094	AGBL4	protein_coding	ATP/GTP binding protein like 4	REP		REP	intronic	48	193	0.237044	FALSE	FALSE	1	1	1	1	0	0	0	0.2705
1_48814770	1	48814770	T_C	-	single_cogn_Minus	ENSG00000186094	AGBL4	protein_coding	ATP/GTP binding protein like 4	REP		REP	intronic	15	157	0.0898186	FALSE	FALSE			1	1	0	0	0	0.9348
1_48814788	1	48814788	T_C	-	single_cogn_Minus	ENSG00000186094	AGBL4	protein_coding	ATP/GTP binding protein like 4	uncatalog		NONREP_novel	intronic	14	133	0.101921	FALSE	FALSE			0	0	0	0	0	0.8266
1_48814794	1	48814794	T_C	-	single_cogn_Minus	ENSG00000186094	AGBL4	protein_coding	ATP/GTP binding protein like 4	REP		REP	intronic	10	127	0.0758769	FALSE	FALSE			1	1	0	0	0	0.3499
1_48814795	1	48814795	T_C	-	single_cogn_Minus	ENSG00000186094	AGBL4	protein_coding	ATP/GTP binding protein like 4	REP		REP	intronic	12	127	0.0876755	FALSE	FALSE			1	1	0	0	0	0.8467
1_48814850	1	48814850	T_C	-	single_cogn_Minus	ENSG00000186094	AGBL4	protein_coding	ATP/GTP binding protein like 4	uncatalog		NONREP_novel	intronic	23	69	0.323838	FALSE	FALSE	1	1	0	0	0	0	0	0.8921
1_48814855	1	48814855	T_C	-	single_cogn_Minus	ENSG00000186094	AGBL4	protein_coding	ATP/GTP binding protein like 4	uncatalog		NONREP_novel	intronic	11	69	0.15942	FALSE	FALSE			0	0	0	0	0	0.4365
1_49372801	1	49372801	T_C	-	single_cogn_Minus	ENSG00000186094	AGBL4	protein_coding	ATP/GTP binding protein like 4	uncatalog	AluJb_2016	ALU_novel	intronic	21	317	0.0566489	FALSE	FALSE			0	0	0	0	0	0.3284
1_49488469	1	49488469	T_C	-	single_cogn_Minus	ENSG00000186094	AGBL4	protein_coding	ATP/GTP binding protein like 4	uncatalog		NONREP_novel	intronic	20	136	0.140579	FALSE	FALSE			0	0	0	0	0	0.9418
1_49488523	1	49488523	T_C	-	single_cogn_Minus	ENSG00000186094	AGBL4	protein_coding	ATP/GTP binding protein like 4	uncatalog		NONREP_novel	intronic	10	104	0.0961538	FALSE	FALSE			0	0	0	0	0	0.9123
1_49488524	1	49488524	T_C	-	single_cogn_Minus	ENSG00000186094	AGBL4	protein_coding	ATP/GTP binding protein like 4	uncatalog		NONREP_novel	intronic	19	103	0.176375	FALSE	FALSE			0	0	0	0	0	0.5288
1_49488525	1	49488525	T_C	-	single_cogn_Minus	ENSG00000186094	AGBL4	protein_coding	ATP/GTP binding protein like 4	uncatalog		NONREP_novel	intronic	10	104	0.0961538	FALSE	FALSE			0	0	0	0	0	0.2476
1_49488563	1	49488563	T_C	-	single_cogn_Minus	ENSG00000186094	AGBL4	protein_coding	ATP/GTP binding protein like 4	uncatalog		NONREP_novel	intronic	17	89	0.183609	FALSE	FALSE			0	0	0	0	0	0.6985
1_49488565	1	49488565	T_C	-	single_cogn_Minus	ENSG00000186094	AGBL4	protein_coding	ATP/GTP binding protein like 4	uncatalog		NONREP_novel	intronic	29	84	0.345238	FALSE	FALSE			0	0	0	0	0	0.9093
1_49488566	1	49488566	T_C	-	single_cogn_Minus	ENSG00000186094	AGBL4	protein_coding	ATP/GTP binding protein like 4	uncatalog		NONREP_novel	intronic	27	86	0.313953	FALSE	FALSE			0	0	0	0	0	0.704
1_49488570	1	49488570	T_C	-	single_cogn_Minus	ENSG00000186094	AGBL4	protein_coding	ATP/GTP binding protein like 4	uncatalog		NONREP_novel	intronic	19	87	0.218391	FALSE	FALSE			0	0	0	0	0	0.5627
1_49488574	1	49488574	T_C	-	single_cogn_Minus	ENSG00000186094	AGBL4	protein_coding	ATP/GTP binding protein like 4	uncatalog		NONREP_novel	intronic	10	85	0.117647	FALSE	FALSE			0	0	0	0	0	0.9582
1_49548883	1	49548883	T_C	-	single_cogn_Minus	ENSG00000186094	AGBL4	protein_coding	ATP/GTP binding protein like 4	uncatalog		NONREP_novel	intronic	10	79	0.117722	FALSE	FALSE			0	0	0	0	0	0.367
1_49571407	1	49571407	T_C	-	single_cogn_Minus	ENSG00000186094	AGBL4	protein_coding	ATP/GTP binding protein like 4	uncatalog		NONREP_novel	intronic	18	92	0.195393	FALSE	FALSE			0	0	0	0	0	0.8158
1_50014601	1	50014601	T_C	-	single_cogn_Minus	ENSG00000186094	AGBL4	protein_coding	ATP/GTP binding protein like 4	uncatalog	AluSx_2088	ALU_novel	intronic	24	201	0.110779	FALSE	FALSE			0	0	0	0	0	0.8023
1_50636433	1	50636433	T_C	-	single_cogn_Minus	ENSG00000185104	FAF1	protein_coding	Fas associated factor 1	ALU	AluSx_1756	ALU	intronic	17	161	0.101863	FALSE	FALSE	1	1	1	1	0	0	0	0.9553
1_50636440	1	50636440	T_C	-	single_cogn_Minus	ENSG00000185104	FAF1	protein_coding	Fas associated factor 1	ALU	AluSx_1756	ALU	intronic	51	167	0.297206	FALSE	FALSE	1	1	1	1	0	0	0	0.4243
1_50636446	1	50636446	T_C	-	single_cogn_Minus	ENSG00000185104	FAF1	protein_coding	Fas associated factor 1	ALU	AluSx_1756	ALU	intronic	15	165	0.089899	FALSE	FALSE			1	0	0	0	0	0.1854
1_51839285	1	51839285	T_C	-	single_cogn_Minus	ENSG00000078618	NRDC	protein_coding	nardilysin convertase	uncatalog	AluJb_1781	ALU_novel	intronic	10	202	0.0473833	FALSE	FALSE			0	0	0	0	0	0.8735
1_52781438	1	52781438	A_G	+	single_cogn_Plus	ENSG00000162378	ZYG11B	protein_coding	zyg-11 family member B, cell cycle regulator	ALU	AluJb_1974	ALU	intronic	12	35	0.328571	FALSE	FALSE	1	1	1	0	0	0	0	0.2134
1_52781462	1	52781462	A_G	+	single_cogn_Plus	ENSG00000162378	ZYG11B	protein_coding	zyg-11 family member B, cell cycle regulator	ALU	AluJb_1974	ALU	intronic	12	46	0.26087	FALSE	FALSE	1	1	1	0	0	0	0	0.3776
1_52925915	1	52925915	T_C	-	single_cogn_Minus	ENSG00000121310	ECHDC2	protein_coding	enoyl-CoA hydratase domain containing 2	REP	FAM_944	REP	intronic	12	58	0.204433	FALSE	FALSE			1	1	0	0	0	0.2874
1_54226828	1	54226828	T_C	-	single_cogn_Minus	ENSG00000157216	SSBP3	protein_coding	single stranded DNA binding protein 3	uncatalog		NONREP_novel	three_prime_utr	15	716	0.0162947	FALSE	FALSE			0	0	0	0	0	0.9099
1_61127224	1	61127224	A_G	+	single_cogn_Plus	ENSG00000162599	NFIA	protein_coding	nuclear factor I A	ALU	AluSc8_2235	ALU	intronic	27	74	0.363176	FALSE	FALSE			1	1	1	0	0	0.8338
1_61127246	1	61127246	A_G	+	single_cogn_Plus	ENSG00000162599	NFIA	protein_coding	nuclear factor I A	ALU	AluSc8_2235	ALU	intronic	17	82	0.202846	FALSE	FALSE			1	1	0	0	0	0.1532
1_61721847	1	61721847	T_C	-	single_cogn_Minus	ENSG00000162604	TM2D1	protein_coding	TM2 domain containing 1	REP	FLAM_C_764	REP	intronic	10	112	0.0892857	FALSE	FALSE	1	1	1	0	0	0	0	0.4732
1_61721853	1	61721853	T_C	-	single_cogn_Minus	ENSG00000162604	TM2D1	protein_coding	TM2 domain containing 1	REP	FLAM_C_764	REP	intronic	29	107	0.270509	FALSE	FALSE			1	0	0	0	0	0.375
1_61721892	1	61721892	T_C	-	single_cogn_Minus	ENSG00000162604	TM2D1	protein_coding	TM2 domain containing 1	uncatalog	FLAM_C_764	REP_novel	intronic	17	146	0.114726	FALSE	FALSE			0	0	0	0	0	0.1007
1_61721925	1	61721925	T_C	-	single_cogn_Minus	ENSG00000162604	TM2D1	protein_coding	TM2 domain containing 1	REP	FLAM_C_764	REP	intronic	34	129	0.263566	FALSE	FALSE			1	0	0	0	0	0.2221
1_62483800	1	62483800	T_C	-	single_cogn_Minus	ENSG00000116641	DOCK7	protein_coding	dedicator of cytokinesis 7	ALU	AluJb_1744	ALU	three_prime_utr	26	50	0.510936	FALSE	FALSE			1	1	1	1	1	0.9849
1_64986144	1	64986144	T_C	-	single_cogn_Minus	ENSG00000226891	LINC01359	processed_transcript	long intergenic non-protein coding RNA 1359	ALU	AluSq_2163	ALU		32	115	0.275556	FALSE	FALSE			1	1	0	0	0	0.6386
1_67417553	1	67417553	T_C	-	single_cogn_Minus	ENSG00000142864	SERBP1	protein_coding	SERPINE1 mRNA binding protein 1	ALU	AluSz_1981	ALU	intronic	16	208	0.0698595	FALSE	FALSE			1	1	1	1	0	0.6772
1_67417613	1	67417613	T_C	-	single_cogn_Minus	ENSG00000142864	SERBP1	protein_coding	SERPINE1 mRNA binding protein 1	ALU	AluSz_1981	ALU	intronic	78	145	0.355351	FALSE	FALSE	8	3	1	1	1	0	0	0.0306
1_69881935	1	69881935	A_G	+	single_cogn_Plus	ENSG00000033122	LRRC7	protein_coding	leucine rich repeat containing 7	uncatalog		NONREP_novel	intronic	19	118	0.14266	FALSE	FALSE			0	0	0	0	0	0.9868
1_69881936	1	69881936	A_G	+	single_cogn_Plus	ENSG00000033122	LRRC7	protein_coding	leucine rich repeat containing 7	REP		REP	intronic	16	118	0.125047	FALSE	FALSE	3	1	1	1	1	1	0	0.736
1_69881946	1	69881946	A_G	+	single_cogn_Plus	ENSG00000033122	LRRC7	protein_coding	leucine rich repeat containing 7	REP		REP	intronic	43	117	0.336227	FALSE	FALSE	3	2	1	1	0	0	0	0.8679
1_69881958	1	69881958	A_G	+	single_cogn_Plus	ENSG00000033122	LRRC7	protein_coding	leucine rich repeat containing 7	REP		REP	intronic	41	119	0.310049	FALSE	FALSE	2	2	1	1	0	1	0	0.7898
1_70309115	1	70309115	T_C	-	single_cogn_Minus	ENSG00000118454	ANKRD13C	protein_coding	ankyrin repeat domain 13C	ALU	AluSx1_2114	ALU	intronic	14	50	0.28	FALSE	FALSE			1	1	1	0	0	0.4524
1_70309116	1	70309116	T_C	-	single_cogn_Minus	ENSG00000118454	ANKRD13C	protein_coding	ankyrin repeat domain 13C	ALU	AluSx1_2114	ALU	intronic	34	48	0.70625	FALSE	FALSE			1	1	1	0	0	0.4801
1_71874891	1	71874891	T_C	-	single_cogn_Minus	ENSG00000172260	NEGR1	protein_coding	neuronal growth regulator 1	uncatalog	AluJo_1853	ALU_novel	intronic	11	106	0.0981581	FALSE	FALSE			0	0	0	0	0	0.9016
1_71874919	1	71874919	T_C	-	single_cogn_Minus	ENSG00000172260	NEGR1	protein_coding	neuronal growth regulator 1	ALU	AluJo_1853	ALU	intronic	68	119	0.558024	FALSE	FALSE	1	1	1	1	1	0	0	0.052
1_71874926	1	71874926	T_C	-	single_cogn_Minus	ENSG00000172260	NEGR1	protein_coding	neuronal growth regulator 1	ALU	AluJo_1853	ALU	intronic	70	112	0.601541	FALSE	FALSE	2	2	1	1	1	1	0	0.2692
1_72076931	1	72076931	T_C	-	single_cogn_Minus	ENSG00000172260	NEGR1	protein_coding	neuronal growth regulator 1	uncatalog	AluSc_2215	ALU_novel	intronic	57	316	0.158287	FALSE	FALSE			0	0	0	0	0	0.7095
1_72076934	1	72076934	T_C	-	single_cogn_Minus	ENSG00000172260	NEGR1	protein_coding	neuronal growth regulator 1	uncatalog	AluSc_2215	ALU_novel	intronic	10	341	0.02611	FALSE	FALSE			0	0	0	0	0	0.8081
1_72087795	1	72087795	T_C	-	single_cogn_Minus	ENSG00000172260	NEGR1	protein_coding	neuronal growth regulator 1	ALU	AluJr_1251	ALU	intronic	92	239	0.367548	TRUE	FALSE			1	1	1	0	0	0.2528
1_72087813	1	72087813	T_C	-	single_cogn_Minus	ENSG00000172260	NEGR1	protein_coding	neuronal growth regulator 1	ALU	AluJr_1251	ALU	intronic	37	291	0.11419	FALSE	FALSE			1	1	1	0	0	0.953
1_72087814	1	72087814	T_C	-	single_cogn_Minus	ENSG00000172260	NEGR1	protein_coding	neuronal growth regulator 1	uncatalog	AluJr_1251	ALU_novel	intronic	10	293	0.0288102	FALSE	FALSE			0	0	0	0	0	0.8106
1_72087815	1	72087815	T_C	-	single_cogn_Minus	ENSG00000172260	NEGR1	protein_coding	neuronal growth regulator 1	uncatalog	AluJr_1251	ALU_novel	intronic	21	294	0.0645504	FALSE	FALSE			0	0	0	0	0	0.971
1_72087841	1	72087841	T_C	-	single_cogn_Minus	ENSG00000172260	NEGR1	protein_coding	neuronal growth regulator 1	uncatalog	AluJr_1251	ALU_novel	intronic	17	286	0.0488678	FALSE	FALSE			0	0	0	0	0	0.6076
1_72087842	1	72087842	T_C	-	single_cogn_Minus	ENSG00000172260	NEGR1	protein_coding	neuronal growth regulator 1	uncatalog	AluJr_1251	ALU_novel	intronic	10	282	0.029808	FALSE	FALSE			0	0	0	0	0	0.8431
1_72087846	1	72087846	T_C	-	single_cogn_Minus	ENSG00000172260	NEGR1	protein_coding	neuronal growth regulator 1	ALU	AluJr_1251	ALU	intronic	19	265	0.0646159	FALSE	FALSE			1	1	0	0	0	0.6123
1_72087847	1	72087847	T_C	-	single_cogn_Minus	ENSG00000172260	NEGR1	protein_coding	neuronal growth regulator 1	uncatalog	AluJr_1251	ALU_novel	intronic	37	265	0.126268	TRUE	FALSE	1	1	0	0	0	0	0	0.887
1_72087868	1	72087868	T_C	-	single_cogn_Minus	ENSG00000172260	NEGR1	protein_coding	neuronal growth regulator 1	ALU	AluJr_1251	ALU	intronic	14	247	0.054001	FALSE	FALSE			1	1	0	1	0	0.4663
1_72149798	1	72149798	T_C	-	single_cogn_Minus	ENSG00000172260	NEGR1	protein_coding	neuronal growth regulator 1	ALU	AluSp_2287	ALU	intronic	14	234	0.0543605	FALSE	FALSE			1	1	1	0	0	0.289
1_72161746	1	72161746	T_C	-	single_cogn_Minus	ENSG00000172260	NEGR1	protein_coding	neuronal growth regulator 1	ALU	AluSx1_1993	ALU	intronic	32	832	0.0268103	FALSE	FALSE			1	1	1	1	0	0.7525
1_72161747	1	72161747	T_C	-	single_cogn_Minus	ENSG00000172260	NEGR1	protein_coding	neuronal growth regulator 1	uncatalog	AluSx1_1993	ALU_novel	intronic	77	827	0.0717055	FALSE	FALSE			0	0	0	0	0	0.8512
1_72161892	1	72161892	T_C	-	single_cogn_Minus	ENSG00000172260	NEGR1	protein_coding	neuronal growth regulator 1	uncatalog	AluSx1_1993	ALU_novel	intronic	32	127	0.248097	FALSE	FALSE			0	0	0	0	0	0.7969
1_72161938	1	72161938	T_C	-	single_cogn_Minus	ENSG00000172260	NEGR1	protein_coding	neuronal growth regulator 1	ALU	AluSx1_1993	ALU	intronic	15	36	0.416667	FALSE	FALSE	3	3	1	1	1	1	1	0.5421
1_77654979	1	77654979	T_C	-	single_cogn_Minus	ENSG00000036549	ZZZ3	protein_coding	zinc finger ZZ-type containing 3	REP		REP	intronic	16	39	0.410256	FALSE	FALSE	1	1	1	1	0	0	0	0.4
1_77698278	1	77698278	T_C	-	single_cogn_Minus	ENSG00000077254	USP33	protein_coding	ubiquitin specific peptidase 33	ALU	AluSg_2270	ALU	intronic	19	133	0.141527	FALSE	FALSE	2	2	1	1	1	1	0	0.9993
1_77698279	1	77698279	T_C	-	single_cogn_Minus	ENSG00000077254	USP33	protein_coding	ubiquitin specific peptidase 33	ALU	AluSg_2270	ALU	intronic	16	134	0.113937	FALSE	FALSE			1	1	1	1	0	0.9991
1_81789647	1	81789647	A_G	+	single_cogn_Plus	ENSG00000117114	ADGRL2	protein_coding	adhesion G protein-coupled receptor L2	ALU	AluSc_1988	ALU	intronic	14	49	0.285714	FALSE	FALSE			1	0	0	0	0	0.4795
1_81861769	1	81861769	A_G	+	single_cogn_Plus	ENSG00000117114	ADGRL2	protein_coding	adhesion G protein-coupled receptor L2	ALU	AluSz_2071	ALU	intronic	10	40	0.25	FALSE	FALSE			1	1	0	0	0	0.6376
1_81861846	1	81861846	A_G	+	single_cogn_Plus	ENSG00000117114	ADGRL2	protein_coding	adhesion G protein-coupled receptor L2	ALU	AluSz_2071	ALU	intronic	11	81	0.133903	FALSE	FALSE			1	0	0	0	0	0.9995
1_83989410	1	83989410	T_C	-	single_cogn_Minus	ENSG00000137941	TTLL7	protein_coding	tubulin tyrosine ligase like 7	REP		REP	intronic	19	58	0.304203	FALSE	TRUE	3	2	1	1	1	0	0	0.5355
1_97994359	1	97994359	T_C	-	single_cogn_Minus	ENSG00000225206	MIR137HG	lincRNA	MIR137 host gene	ALU	AluSx_1617	ALU		159	732	0.172118	FALSE	FALSE			1	1	1	1	1	0.8293
1_97994368	1	97994368	T_C	-	single_cogn_Minus	ENSG00000225206	MIR137HG	lincRNA	MIR137 host gene	ALU	AluSx_1617	ALU		10	600	0.0124818	FALSE	FALSE			1	1	1	1	0	0.9682
1_97994381	1	97994381	T_C	-	single_cogn_Minus	ENSG00000225206	MIR137HG	lincRNA	MIR137 host gene	ALU	AluSx_1617	ALU		14	318	0.0241296	FALSE	FALSE			1	1	1	1	1	0.7639
1_103558682	1	103558682	A_G	+	single_cogn_Plus	ENSG00000240038	AMY2B	protein_coding	amylase, alpha 2B (pancreatic)	uncatalog	AluJr_928	ALU_novel	intronic	12	148	0.0731338	FALSE	FALSE			0	0	0	0	0	0.2719
1_103559346	1	103559346	A_G	+	single_cogn_Plus	ENSG00000240038	AMY2B	protein_coding	amylase, alpha 2B (pancreatic)	REP		REP	intronic	10	29	0.344828	FALSE	FALSE	2	2	1	1	1	1	0	0.051
1_109395358	1	109395358	T_C	-	single_cogn_Minus	ENSG00000134243	SORT1	protein_coding	sortilin 1	ALU	AluSz_2041	ALU	intronic	20	31	0.645161	FALSE	FALSE			1	1	1	1	0	0.4322
1_109395359	1	109395359	T_C	-	single_cogn_Minus	ENSG00000134243	SORT1	protein_coding	sortilin 1	ALU	AluSz_2041	ALU	intronic	19	31	0.612903	FALSE	FALSE	1	1	1	1	1	0	0	0.3876
1_110157996	1	110157996	A_G	+	single_cogn_Plus	ENSG00000197106	SLC6A17	protein_coding	solute carrier family 6 member 17	uncatalog		NONREP_novel	intronic	11	22	0.5	FALSE	FALSE			0	0	0	0	0	0.6926
1_113716397	1	113716397	T_C	-	single_cogn_Minus	ENSG00000116793	PHTF1	protein_coding	putative homeodomain transcription factor 1	ALU	AluJr_1791	ALU	intronic	26	481	0.0441216	FALSE	FALSE			1	1	1	0	0	0.9979
1_113716410	1	113716410	T_C	-	single_cogn_Minus	ENSG00000116793	PHTF1	protein_coding	putative homeodomain transcription factor 1	ALU	AluJr_1791	ALU	intronic	291	501	0.541494	FALSE	FALSE	3	3	1	1	1	1	1	0.9778
1_113716411	1	113716411	T_C	-	single_cogn_Minus	ENSG00000116793	PHTF1	protein_coding	putative homeodomain transcription factor 1	ALU	AluJr_1791	ALU	intronic	42	505	0.0724302	FALSE	FALSE			1	1	1	0	0	0.9507
1_113716417	1	113716417	T_C	-	single_cogn_Minus	ENSG00000116793	PHTF1	protein_coding	putative homeodomain transcription factor 1	uncatalog	AluJr_1791	ALU_novel	intronic	25	506	0.0464457	FALSE	FALSE			0	0	0	0	0	0.9322
1_113934767	1	113934767	A_G	+	single_cogn_Plus	ENSG00000163349	HIPK1	protein_coding	homeodomain interacting protein kinase 1	ALU	AluJr4_1541	ALU	intronic	11	52	0.211538	FALSE	FALSE			1	0	0	0	0	0.7411
1_145776233	1	145776233	T_C	-	single_cogn_Minus	ENSG00000265491	RNF115	protein_coding	ring finger protein 115	uncatalog	AluSx1_2225	ALU_novel	intronic	18	114	0.15614	FALSE	FALSE			0	0	0	0	0	0.8229
1_149903820	1	149903820	T_C	-	single_cogn_Minus	ENSG00000159164	SV2A	protein_coding	synaptic vesicle glycoprotein 2A	uncatalog		NONREP_novel	three_prime_utr	11	1559	0.00262501	FALSE	FALSE			0	0	0	0	0	0.9312
1_149923454	1	149923454	T_C	-	single_cogn_Minus	ENSG00000143368	SF3B4	protein_coding	splicing factor 3b subunit 4	uncatalog		NONREP_novel	three_prime_utr	18	142	0.110755	FALSE	FALSE	2	2	0	0	0	0	0	0.9468
1_151219953	1	151219953	A_G	+	single_cogn_Plus	ENSG00000143398	PIP5K1A	protein_coding	phosphatidylinositol-4-phosphate 5-kinase type 1 alpha	REP	FLAM_C_895	REP	intronic	14	108	0.12963	FALSE	FALSE			1	0	0	0	0	0.9995
1_151219956	1	151219956	A_G	+	single_cogn_Plus	ENSG00000143398	PIP5K1A	protein_coding	phosphatidylinositol-4-phosphate 5-kinase type 1 alpha	REP	FLAM_C_895	REP	intronic	16	109	0.146789	FALSE	FALSE			1	1	0	0	0	0.809
1_151402837	1	151402837	T_C	-	single_cogn_Minus	ENSG00000143442	POGZ	protein_coding	pogo transposable element with ZNF domain	uncatalog		NONREP_novel	three_prime_utr	29	1056	0.0198326	FALSE	FALSE			0	0	0	0	0	0.9679
1_151694452	1	151694452	A_G	+	single_cogn_Plus	ENSG00000143376	SNX27	protein_coding	sorting nexin family member 27	uncatalog		NONREP_novel	three_prime_utr	36	564	0.0497861	FALSE	FALSE			0	0	0	0	0	0.821
1_154255703	1	154255703	A_G	+	single_cogn_Plus	ENSG00000143569	UBAP2L	protein_coding	ubiquitin associated protein 2 like	uncatalog		NONREP_novel	exonic	17	254	0.0550201	FALSE	FALSE			0	0	0	0	0	0.8832
1_155247428	1	155247428	T_C	-	single_cogn_Minus	ENSG00000160767	FAM189B	protein_coding	family with sequence similarity 189 member B	uncatalog		NONREP_novel	three_prime_utr	10	160	0.0514968	FALSE	FALSE			0	0	0	0	0	0.0311
1_156463913	1	156463913	T_C	-	single_cogn_Minus	ENSG00000116604	MEF2D	protein_coding	myocyte enhancer factor 2D	uncatalog		NONREP_novel	three_prime_utr	11	609	0.0148572	FALSE	FALSE			0	0	0	0	0	0.5054
1_163076683	1	163076683	A_G	+	single_cogn_Plus	ENSG00000117152	RGS4	protein_coding	regulator of G-protein signaling 4	uncatalog		NONREP_novel	three_prime_utr	35	851	0.022372	FALSE	FALSE	1	1	0	0	0	0	0	0.9422
1_169131402	1	169131402	A_G	+	single_cogn_Plus	ENSG00000143153	ATP1B1	protein_coding	ATPase Na+/K+ transporting subunit beta 1	uncatalog		NONREP_novel	exonic	13	566	0.0124122	FALSE	FALSE	1	1	0	0	0	0	0	0.4299
1_169131485	1	169131485	A_G	+	single_cogn_Plus	ENSG00000143153	ATP1B1	protein_coding	ATPase Na+/K+ transporting subunit beta 1	uncatalog		NONREP_novel	exonic	20	1193	0.00998169	FALSE	FALSE			0	0	0	0	0	0.3998
1_169153730	1	169153730	T_C	-	single_cogn_Minus	ENSG00000143156	NME7	protein_coding	NME/NM23 family member 7	ALU	AluJb_1701	ALU	intronic	27	111	0.235378	FALSE	FALSE	2	2	1	1	0	0	0	0.4667
1_171532798	1	171532798	A_G	+	single_cogn_Plus	ENSG00000117523	PRRC2C	protein_coding	proline rich coiled-coil 2C	uncatalog		NONREP_novel	exonic	10	1795	0.00218261	FALSE	FALSE			0	0	0	0	0	0.7003
1_171532840	1	171532840	A_G	+	single_cogn_Plus	ENSG00000117523	PRRC2C	protein_coding	proline rich coiled-coil 2C	uncatalog		NONREP_novel	exonic	12	840	0.0109827	FALSE	FALSE			0	0	0	0	0	0.9558
1_171532843	1	171532843	A_G	+	single_cogn_Plus	ENSG00000117523	PRRC2C	protein_coding	proline rich coiled-coil 2C	uncatalog		NONREP_novel	exonic	21	821	0.0190563	FALSE	FALSE			0	0	0	0	0	0.8851
1_171593426	1	171593426	A_G	+	single_cogn_Plus	ENSG00000117523	PRRC2C	protein_coding	proline rich coiled-coil 2C	uncatalog		NONREP_novel	three_prime_utr	27	1398	0.0123601	FALSE	FALSE			0	0	0	0	0	0.6389
1_173931492	1	173931492	T_C	-	single_cogn_Minus	ENSG00000135870	RC3H1	protein_coding	ring finger and CCCH-type domains 1	uncatalog		NONREP_novel	three_prime_utr	10	143	0.0549974	FALSE	FALSE			0	0	0	0	0	0.0272
1_174832243	1	174832243	A_G	+	single_cogn_Plus	ENSG00000152061	RABGAP1L	protein_coding	RAB GTPase activating protein 1 like	ALU	AluSx1_2434	ALU	intronic	19	230	0.0741343	FALSE	FALSE	1	1	1	1	1	1	1	0.9818
1_174832275	1	174832275	A_G	+	single_cogn_Plus	ENSG00000152061	RABGAP1L	protein_coding	RAB GTPase activating protein 1 like	ALU	AluSx1_2434	ALU	intronic	84	268	0.292877	FALSE	FALSE	2	2	1	1	1	1	1	0.6851
1_174832280	1	174832280	A_G	+	single_cogn_Plus	ENSG00000152061	RABGAP1L	protein_coding	RAB GTPase activating protein 1 like	ALU	AluSx1_2434	ALU	intronic	21	262	0.0763359	FALSE	FALSE	1	1	1	1	1	1	1	0.8797
1_179213371	1	179213371	T_C	-	single_cogn_Minus	ENSG00000143322	ABL2	protein_coding	ABL proto-oncogene 2, non-receptor tyrosine kinase	uncatalog	AluJo_1413	ALU_novel	intronic	24	145	0.157458	FALSE	FALSE			0	0	0	0	0	0.2255
1_179213396	1	179213396	T_C	-	single_cogn_Minus	ENSG00000143322	ABL2	protein_coding	ABL proto-oncogene 2, non-receptor tyrosine kinase	ALU	AluJo_1413	ALU	intronic	23	141	0.160196	FALSE	FALSE	1	1	1	0	0	0	0	0.6503
1_180347441	1	180347441	T_C	-	single_cogn_Minus	ENSG00000230124	ACBD6	protein_coding	acyl-CoA binding domain containing 6	ALU	AluSx1_1380	ALU	intronic	12	41	0.291248	FALSE	FALSE	1	1	1	0	0	0	0	0.9163
1_183249902	1	183249902	T_C	-	single_cogn_Minus	ENSG00000157064	NMNAT2	protein_coding	nicotinamide nucleotide adenylyltransferase 2	uncatalog		NONREP_novel	three_prime_utr	11	216	0.0352881	FALSE	FALSE			0	0	0	0	0	0.4322
1_183935896	1	183935896	T_C	-	single_cogn_Minus	ENSG00000198756	COLGALT2	protein_coding	collagen beta(1-O)galactosyltransferase 2	uncatalog		NONREP_novel	three_prime_utr	16	417	0.0250351	FALSE	FALSE			0	0	0	0	0	0.9962
1_198736149	1	198736149	A_G	+	single_cogn_Plus	ENSG00000081237	PTPRC	protein_coding	protein tyrosine phosphatase, receptor type C	uncatalog		NONREP_novel	intronic	20	35	0.571429	FALSE	FALSE			0	0	0	0	0	0.6898
1_205145618	1	205145618	T_C	-	single_cogn_Minus	ENSG00000133059	DSTYK	protein_coding	dual serine/threonine and tyrosine protein kinase	uncatalog	AluSx_1404	ALU_novel	three_prime_utr	10	340	0.0212028	FALSE	FALSE			0	0	0	0	0	0.8563
1_205740114	1	205740114	T_C	-	single_cogn_Minus	ENSG00000069275	NUCKS1	protein_coding	nuclear casein kinase and cyclin dependent kinase substrate 1	ALU	AluSz_1983	ALU	intronic	15	53	0.282026	FALSE	FALSE	5	4	1	1	1	0	0	0.6108
1_220662868	1	220662868	A_G	+	single_cogn_Plus	ENSG00000116141	MARK1	protein_coding	microtubule affinity regulating kinase 1	uncatalog		NONREP_novel	three_prime_utr	10	389	0.0170237	FALSE	FALSE			0	0	0	0	0	0.4654
1_224282154	1	224282154	T_C	-	single_cogn_Minus	ENSG00000143748	NVL	protein_coding	nuclear VCP-like	ALU	AluJb_1444	ALU	intronic	12	33	0.356061	FALSE	FALSE	1	1	1	1	0	0	0	0.9492
1_224282162	1	224282162	T_C	-	single_cogn_Minus	ENSG00000143748	NVL	protein_coding	nuclear VCP-like	ALU	AluJb_1444	ALU	intronic	11	33	0.329004	FALSE	FALSE			1	0	0	0	0	0.1562
1_224282163	1	224282163	T_C	-	single_cogn_Minus	ENSG00000143748	NVL	protein_coding	nuclear VCP-like	ALU	AluJb_1444	ALU	intronic	10	33	0.30303	FALSE	FALSE			1	0	0	0	0	0.6474
1_227086755	1	227086755	T_C	-	single_cogn_Minus	ENSG00000143776	CDC42BPA	protein_coding	CDC42 binding protein kinase alpha	ALU	AluJb_1507	ALU	intronic	15	150	0.0922222	FALSE	FALSE			1	1	0	0	0	0.5266
1_227086784	1	227086784	T_C	-	single_cogn_Minus	ENSG00000143776	CDC42BPA	protein_coding	CDC42 binding protein kinase alpha	uncatalog	AluJb_1507	ALU_novel	intronic	14	122	0.108197	FALSE	FALSE			0	0	0	0	0	0.8143
1_227086806	1	227086806	T_C	-	single_cogn_Minus	ENSG00000143776	CDC42BPA	protein_coding	CDC42 binding protein kinase alpha	ALU	AluJb_1507	ALU	intronic	14	106	0.130503	TRUE	FALSE	1	1	1	1	1	0	0	0.1661
1_229325270	1	229325270	T_C	-	single_cogn_Minus	ENSG00000154429	CCSAP	protein_coding	centriole, cilia and spindle associated protein	uncatalog		NONREP_novel	exonic	10	253	0.0328121	FALSE	FALSE			0	0	0	0	0	0.4492
1_234391424	1	234391424	T_C	-	single_cogn_Minus	ENSG00000059588	TARBP1	protein_coding	TAR (HIV-1) RNA binding protein 1	uncatalog		NONREP_novel	three_prime_utr	12	966	0.00877468	FALSE	FALSE			0	0	0	0	0	0.3201
1_235485481	1	235485481	T_C	-	single_cogn_Minus	ENSG00000162885	B3GALNT2	protein_coding	beta-1,3-N-acetylgalactosaminyltransferase 2	ALU	AluJb_1782	ALU	intronic	12	54	0.197354	FALSE	FALSE			1	0	0	0	0	0.6345
1_235820422	1	235820422	T_C	-	single_cogn_Minus	ENSG00000143669	LYST	protein_coding	lysosomal trafficking regulator	ALU	AluJb_2153	ALU	intronic	50	156	0.312876	FALSE	FALSE			1	1	1	0	0	0.9796
1_235820438	1	235820438	T_C	-	single_cogn_Minus	ENSG00000143669	LYST	protein_coding	lysosomal trafficking regulator	ALU	AluJb_2153	ALU	intronic	43	160	0.257446	FALSE	FALSE			1	1	1	0	0	0.9518
1_235820446	1	235820446	T_C	-	single_cogn_Minus	ENSG00000143669	LYST	protein_coding	lysosomal trafficking regulator	ALU	AluJb_2153	ALU	intronic	36	158	0.213506	FALSE	FALSE			1	1	1	0	0	0.9954
1_235820467	1	235820467	T_C	-	single_cogn_Minus	ENSG00000143669	LYST	protein_coding	lysosomal trafficking regulator	ALU	AluJb_2153	ALU	intronic	32	158	0.201558	FALSE	FALSE	2	1	1	1	1	0	0	0.994
1_237111533	1	237111533	A_G	+	single_cogn_Plus	ENSG00000198626	RYR2	protein_coding	ryanodine receptor 2	ALU	AluSx1_2066	ALU	intronic	11	245	0.0435374	FALSE	FALSE			1	0	0	0	0	0.6235
1_237111538	1	237111538	A_G	+	single_cogn_Plus	ENSG00000198626	RYR2	protein_coding	ryanodine receptor 2	ALU	AluSx1_2066	ALU	intronic	36	244	0.137621	FALSE	FALSE			1	1	0	0	0	0.9595
1_237156872	1	237156872	A_G	+	single_cogn_Plus	ENSG00000198626	RYR2	protein_coding	ryanodine receptor 2	REP		REP	intronic	12	24	0.456263	FALSE	FALSE			1	1	0	0	0	0.7054
1_237156945	1	237156945	A_G	+	single_cogn_Plus	ENSG00000198626	RYR2	protein_coding	ryanodine receptor 2	uncatalog		NONREP_novel	intronic	11	56	0.196429	FALSE	FALSE			0	0	0	0	0	0.9004
1_237157974	1	237157974	A_G	+	single_cogn_Plus	ENSG00000198626	RYR2	protein_coding	ryanodine receptor 2	uncatalog		NONREP_novel	intronic	27	27	0.998051	FALSE	FALSE	5	4	0	0	0	0	0	0.9012
1_237278311	1	237278311	A_G	+	single_cogn_Plus	ENSG00000198626	RYR2	protein_coding	ryanodine receptor 2	ALU	AluJb_1746	ALU	intronic	24	301	0.0797342	FALSE	FALSE	1	1	1	0	0	0	0	0.9976
1_237278325	1	237278325	A_G	+	single_cogn_Plus	ENSG00000198626	RYR2	protein_coding	ryanodine receptor 2	uncatalog	AluJb_1746	ALU_novel	intronic	25	315	0.0736969	FALSE	FALSE			0	0	0	0	0	0.5463
1_237278326	1	237278326	A_G	+	single_cogn_Plus	ENSG00000198626	RYR2	protein_coding	ryanodine receptor 2	uncatalog	AluJb_1746	ALU_novel	intronic	37	312	0.109209	FALSE	FALSE			0	0	0	0	0	0.7193
1_237278343	1	237278343	A_G	+	single_cogn_Plus	ENSG00000198626	RYR2	protein_coding	ryanodine receptor 2	uncatalog	AluJb_1746	ALU_novel	intronic	14	344	0.0378341	FALSE	FALSE			0	0	0	0	0	0.4579
1_237278351	1	237278351	A_G	+	single_cogn_Plus	ENSG00000198626	RYR2	protein_coding	ryanodine receptor 2	uncatalog	AluJb_1746	ALU_novel	intronic	16	329	0.0460901	FALSE	FALSE			0	0	0	0	0	0.9464
1_237760251	1	237760251	A_G	+	single_cogn_Plus	ENSG00000198626	RYR2	protein_coding	ryanodine receptor 2	ALU	AluJr_1637	ALU	intronic	13	162	0.0802469	FALSE	FALSE			1	1	0	0	0	0.8042
1_237760268	1	237760268	A_G	+	single_cogn_Plus	ENSG00000198626	RYR2	protein_coding	ryanodine receptor 2	ALU	AluJr_1637	ALU	intronic	17	200	0.0835	FALSE	FALSE			1	1	0	0	0	0.5818
1_237760312	1	237760312	A_G	+	single_cogn_Plus	ENSG00000198626	RYR2	protein_coding	ryanodine receptor 2	ALU	AluJr_1637	ALU	intronic	18	237	0.065755	FALSE	FALSE			1	0	0	0	0	0.9711
1_241160048	1	241160048	T_C	-	single_cogn_Minus	ENSG00000182901	RGS7	protein_coding	regulator of G-protein signaling 7	uncatalog	AluYc_839	ALU_novel	intronic	11	286	0.034738	FALSE	FALSE			0	0	0	0	0	0.1634
1_241160080	1	241160080	T_C	-	single_cogn_Minus	ENSG00000182901	RGS7	protein_coding	regulator of G-protein signaling 7	ALU	AluYc_839	ALU	intronic	21	243	0.0764239	FALSE	FALSE			1	1	0	0	0	0.1579
1_241160089	1	241160089	T_C	-	single_cogn_Minus	ENSG00000182901	RGS7	protein_coding	regulator of G-protein signaling 7	uncatalog	AluYc_839	ALU_novel	intronic	10	180	0.0462338	FALSE	FALSE			0	0	0	0	0	0.5356
1_241235984	1	241235984	T_C	-	single_cogn_Minus	ENSG00000182901	RGS7	protein_coding	regulator of G-protein signaling 7	uncatalog		NONREP_novel	intronic	12	169	0.0645159	FALSE	FALSE			0	0	0	0	0	0.4491
1_243689523	1	243689523	T_C	-	single_cogn_Minus	ENSG00000117020	AKT3	protein_coding	AKT serine/threonine kinase 3	uncatalog	FLAM_A_503	REP_novel	intronic	80	149	0.532066	FALSE	FALSE	1	1	0	0	0	0	0	0.3737
1_243815665	1	243815665	T_C	-	single_cogn_Minus	ENSG00000117020	AKT3	protein_coding	AKT serine/threonine kinase 3	ALU	AluJb_1617	ALU	intronic	20	337	0.0536827	FALSE	FALSE	1	1	1	1	1	0	0	0.9221
1_243815739	1	243815739	T_C	-	single_cogn_Minus	ENSG00000117020	AKT3	protein_coding	AKT serine/threonine kinase 3	ALU	AluJb_1617	ALU	intronic	46	190	0.230806	TRUE	FALSE	3	2	1	1	1	0	0	0.3551
1_243815743	1	243815743	T_C	-	single_cogn_Minus	ENSG00000117020	AKT3	protein_coding	AKT serine/threonine kinase 3	ALU	AluJb_1617	ALU	intronic	18	158	0.107685	TRUE	FALSE			1	1	1	0	0	0.9918
1_247314814	1	247314814	T_C	-	single_cogn_Minus	ENSG00000162714	ZNF496	protein_coding	zinc finger protein 496	ALU	AluSz_1668	ALU	intronic	22	102	0.197332	FALSE	FALSE			1	1	1	1	0	0.0734
1_247314871	1	247314871	T_C	-	single_cogn_Minus	ENSG00000162714	ZNF496	protein_coding	zinc finger protein 496	ALU	AluSz_1668	ALU	intronic	16	75	0.212727	FALSE	FALSE	1	1	1	1	1	1	0	0.8757
1_247314898	1	247314898	T_C	-	single_cogn_Minus	ENSG00000162714	ZNF496	protein_coding	zinc finger protein 496	ALU	AluSz_1668	ALU	intronic	24	46	0.521739	FALSE	FALSE	1	1	1	1	1	0	0	0.701
11_9447067	11	9447067	A_G	+	single_cogn_Plus	ENSG00000205339	IPO7	protein_coding	importin 7	uncatalog		NONREP_novel	three_prime_utr	11	582	0.0115447	FALSE	FALSE			0	0	0	0	0	0.1012
11_11963264	11	11963264	T_C	-	single_cogn_Minus	ENSG00000050165	DKK3	protein_coding	dickkopf WNT signaling pathway inhibitor 3	uncatalog		NONREP_novel	three_prime_utr	10	1191	0.00461579	FALSE	FALSE			0	0	0	0	0	0.1376
11_21490277	11	21490277	A_G	+	single_cogn_Plus	ENSG00000165973	NELL1	protein_coding	neural EGFL like 1	uncatalog		NONREP_novel	intronic	18	82	0.214286	FALSE	FALSE	1	1	0	0	0	0	0	0.5293
11_21490307	11	21490307	A_G	+	single_cogn_Plus	ENSG00000165973	NELL1	protein_coding	neural EGFL like 1	uncatalog		NONREP_novel	intronic	18	72	0.25	FALSE	FALSE			0	0	0	0	0	0.0592
11_21490375	11	21490375	A_G	+	single_cogn_Plus	ENSG00000165973	NELL1	protein_coding	neural EGFL like 1	uncatalog		NONREP_novel	intronic	35	110	0.309681	FALSE	FALSE	1	1	0	0	0	0	0	0.3883
11_21490383	11	21490383	A_G	+	single_cogn_Plus	ENSG00000165973	NELL1	protein_coding	neural EGFL like 1	uncatalog		NONREP_novel	intronic	12	115	0.0956522	FALSE	FALSE			0	0	0	0	0	0.048
11_21490432	11	21490432	A_G	+	single_cogn_Plus	ENSG00000165973	NELL1	protein_coding	neural EGFL like 1	uncatalog		NONREP_novel	intronic	10	116	0.0840517	FALSE	FALSE			0	0	0	0	0	0.83
11_21490442	11	21490442	A_G	+	single_cogn_Plus	ENSG00000165973	NELL1	protein_coding	neural EGFL like 1	uncatalog		NONREP_novel	intronic	13	104	0.122041	FALSE	FALSE			0	0	0	0	0	0.4931
11_33647311	11	33647311	A_G	+	single_cogn_Plus	ENSG00000110427	KIAA1549L	protein_coding	KIAA1549 like	uncatalog	AluSz_1892	ALU_novel	intronic	46	146	0.298848	FALSE	FALSE	1	1	0	0	0	0	0	0.5804
11_47164428	11	47164428	T_C	-	single_cogn_Minus	ENSG00000149182	ARFGAP2	protein_coding	ADP ribosylation factor GTPase activating protein 2	uncatalog		NONREP_novel	three_prime_utr	60	505	0.0844372	FALSE	FALSE			0	0	0	0	0	0.7939
11_63700527	11	63700527	A_G	+	single_cogn_Plus	ENSG00000133318	RTN3	protein_coding	reticulon 3	uncatalog	AluJb_1972	ALU_novel	intronic	19	83	0.217441	FALSE	FALSE			0	0	0	0	0	0.2249
11_63700599	11	63700599	A_G	+	single_cogn_Plus	ENSG00000133318	RTN3	protein_coding	reticulon 3	uncatalog		NONREP_novel	intronic	28	44	0.527611	FALSE	FALSE			0	0	0	0	0	0.8666
11_63704534	11	63704534	A_G	+	single_cogn_Plus	ENSG00000133318	RTN3	protein_coding	reticulon 3	uncatalog		NONREP_novel	intronic	13	275	0.0367594	FALSE	FALSE			0	0	0	0	0	0.6839
11_63758716	11	63758716	A_G	+	single_cogn_Plus	ENSG00000133318	RTN3	protein_coding	reticulon 3	uncatalog		NONREP_novel	three_prime_utr	55	226	0.216289	FALSE	FALSE			0	0	0	0	0	0.5863
11_63758956	11	63758956	A_G	+	single_cogn_Plus	ENSG00000133318	RTN3	protein_coding	reticulon 3	uncatalog		NONREP_novel	three_prime_utr	13	837	0.00825013	FALSE	FALSE			0	0	0	0	0	0.9881
11_65502448	11	65502448	A_G	+	single_cogn_Plus	ENSG00000251562	MALAT1	lincRNA	metastasis associated lung adenocarcinoma transcript 1 (non-protein coding)	uncatalog		NONREP_novel		19	754	0.0188167	FALSE	FALSE			0	0	0	0	0	0.4491
11_65505122	11	65505122	A_G	+	single_cogn_Plus	ENSG00000251562	MALAT1	lincRNA	metastasis associated lung adenocarcinoma transcript 1 (non-protein coding)	uncatalog		NONREP_novel		16	841	0.0105783	FALSE	FALSE			0	0	0	0	0	0.7038
11_65505615	11	65505615	A_G	+	single_cogn_Plus	ENSG00000251562	MALAT1	lincRNA	metastasis associated lung adenocarcinoma transcript 1 (non-protein coding)	uncatalog		NONREP_novel		16	996	0.00899671	FALSE	FALSE			0	0	0	0	0	0.8216
11_66563537	11	66563537	T_C	-	single_cogn_Minus	ENSG00000174080	CTSF	protein_coding	cathepsin F	uncatalog		NONREP_novel	three_prime_utr	17	900	0.0129545	FALSE	FALSE			0	0	0	0	0	0.9993
11_66808469	11	66808469	A_G	+	single_cogn_Plus	ENSG00000173715	C11orf80	protein_coding	chromosome 11 open reading frame 80	uncatalog	AluJo_1628	ALU_novel	intronic	10	236	0.0413136	FALSE	FALSE			0	0	0	0	0	0.7239
11_75434727	11	75434727	T_C	-	single_cogn_Minus	ENSG00000158555	GDPD5	protein_coding	glycerophosphodiester phosphodiesterase domain containing 5	uncatalog		NONREP_novel	three_prime_utr	10	225	0.0374188	FALSE	FALSE			0	0	0	0	0	0.7779
11_83520524	11	83520524	T_C	-	single_cogn_Minus	ENSG00000150672	DLG2	protein_coding	discs large MAGUK scaffold protein 2	uncatalog		NONREP_novel	intronic	11	277	0.0333115	FALSE	FALSE			0	0	0	0	0	0.6399
11_83743516	11	83743516	T_C	-	single_cogn_Minus	ENSG00000150672	DLG2	protein_coding	discs large MAGUK scaffold protein 2	uncatalog	AluJb_1806	ALU_novel	intronic	73	242	0.270614	FALSE	FALSE	1	1	0	0	0	0	0	0.0202
11_99125247	11	99125247	A_G	+	single_cogn_Plus	ENSG00000149972	CNTN5	protein_coding	contactin 5	uncatalog		NONREP_novel	intronic	14	130	0.101099	FALSE	FALSE			0	0	0	0	0	0.9688
11_99125251	11	99125251	A_G	+	single_cogn_Plus	ENSG00000149972	CNTN5	protein_coding	contactin 5	uncatalog		NONREP_novel	intronic	17	136	0.121128	FALSE	FALSE	1	1	0	0	0	0	0	0.1959
11_115493104	11	115493104	T_C	-	single_cogn_Minus	ENSG00000182985	CADM1	protein_coding	cell adhesion molecule 1	uncatalog		NONREP_novel	intronic	12	24	0.5	FALSE	FALSE			0	0	0	0	0	0.9241
11_118540960	11	118540960	A_G	+	single_cogn_Plus	ENSG00000149582	TMEM25	protein_coding	transmembrane protein 25	uncatalog		NONREP_novel	intronic	20	73	0.177092	FALSE	FALSE	1	1	0	0	0	0	0	0.529
11_123629960	11	123629960	T_C	-	single_cogn_Minus	ENSG00000166257	SCN3B	protein_coding	sodium voltage-gated channel beta subunit 3	uncatalog		NONREP_novel	three_prime_utr	11	1037	0.00684653	FALSE	FALSE			0	0	0	0	0	0.4532
11_123629961	11	123629961	T_C	-	single_cogn_Minus	ENSG00000166257	SCN3B	protein_coding	sodium voltage-gated channel beta subunit 3	uncatalog		NONREP_novel	three_prime_utr	12	1030	0.00729182	FALSE	FALSE			0	0	0	0	0	0.5512
11_123629962	11	123629962	T_C	-	single_cogn_Minus	ENSG00000166257	SCN3B	protein_coding	sodium voltage-gated channel beta subunit 3	uncatalog		NONREP_novel	three_prime_utr	12	1027	0.00731017	FALSE	FALSE			0	0	0	0	0	0.5517
11_124746861	11	124746861	A_G	+	single_cogn_Plus	ENSG00000154146	NRGN	protein_coding	neurogranin	uncatalog		NONREP_novel	three_prime_utr	18	683	0.0156383	FALSE	FALSE			0	0	0	0	0	0.248
11_126863394	11	126863394	T_C	-	single_cogn_Minus	ENSG00000149571	KIRREL3	protein_coding	kin of IRRE like 3 (Drosophila)	uncatalog		NONREP_novel	intronic	114	489	0.173464	FALSE	FALSE			0	0	0	0	0	0.3083
11_130144332	11	130144332	A_G	+	single_cogn_Plus	ENSG00000084234	APLP2	protein_coding	amyloid beta precursor like protein 2	uncatalog		NONREP_novel	three_prime_utr	18	603	0.019336	FALSE	FALSE			0	0	0	0	0	0.7873
11_132818369	11	132818369	T_C	-	single_cogn_Minus	ENSG00000183715	OPCML	protein_coding	opioid binding protein/cell adhesion molecule like	uncatalog		NONREP_novel	intronic	13	282	0.0234544	FALSE	FALSE			0	0	0	0	0	0.2229
11_132833369	11	132833369	T_C	-	single_cogn_Minus	ENSG00000183715	OPCML	protein_coding	opioid binding protein/cell adhesion molecule like	uncatalog		NONREP_novel	intronic	23	183	0.103382	FALSE	FALSE			0	0	0	0	0	0.3726
11_132873057	11	132873057	T_C	-	single_cogn_Minus	ENSG00000183715	OPCML	protein_coding	opioid binding protein/cell adhesion molecule like	uncatalog		NONREP_novel	intronic	12	299	0.0352089	FALSE	FALSE			0	0	0	0	0	0.602
11_133027822	11	133027822	T_C	-	single_cogn_Minus	ENSG00000183715	OPCML	protein_coding	opioid binding protein/cell adhesion molecule like	uncatalog		NONREP_novel	intronic	318	561	0.375983	FALSE	FALSE			0	0	0	0	0	0.7021
11_133240097	11	133240097	T_C	-	single_cogn_Minus	ENSG00000183715	OPCML	protein_coding	opioid binding protein/cell adhesion molecule like	uncatalog		NONREP_novel	intronic	12	126	0.0873016	FALSE	FALSE			0	0	0	0	0	0.3764
11_133287316	11	133287316	T_C	-	single_cogn_Minus	ENSG00000183715	OPCML	protein_coding	opioid binding protein/cell adhesion molecule like	uncatalog	FLAM_C_796	REP_novel	intronic	11	717	0.0129919	FALSE	FALSE			0	0	0	0	0	0.9189
11_133287336	11	133287336	T_C	-	single_cogn_Minus	ENSG00000183715	OPCML	protein_coding	opioid binding protein/cell adhesion molecule like	uncatalog	FLAM_C_796	REP_novel	intronic	10	914	0.00740628	FALSE	FALSE			0	0	0	0	0	0.5464
11_133287339	11	133287339	T_C	-	single_cogn_Minus	ENSG00000183715	OPCML	protein_coding	opioid binding protein/cell adhesion molecule like	uncatalog	FLAM_C_796	REP_novel	intronic	15	914	0.0120003	FALSE	FALSE	2	2	0	0	0	0	0	0.6134
11_133287357	11	133287357	T_C	-	single_cogn_Minus	ENSG00000183715	OPCML	protein_coding	opioid binding protein/cell adhesion molecule like	uncatalog	FLAM_C_796	REP_novel	intronic	41	823	0.0393723	FALSE	FALSE			0	0	0	0	0	0.084
11_133287363	11	133287363	T_C	-	single_cogn_Minus	ENSG00000183715	OPCML	protein_coding	opioid binding protein/cell adhesion molecule like	uncatalog	FLAM_C_796	REP_novel	intronic	222	777	0.245136	FALSE	FALSE	10	3	0	0	0	0	0	0.0697
11_133287368	11	133287368	T_C	-	single_cogn_Minus	ENSG00000183715	OPCML	protein_coding	opioid binding protein/cell adhesion molecule like	uncatalog	FLAM_C_796	REP_novel	intronic	36	719	0.0378353	FALSE	FALSE	1	1	0	0	0	0	0	0.4179
11_133287379	11	133287379	T_C	-	single_cogn_Minus	ENSG00000183715	OPCML	protein_coding	opioid binding protein/cell adhesion molecule like	uncatalog	FLAM_C_796	REP_novel	intronic	10	571	0.0160484	FALSE	FALSE			0	0	0	0	0	0.6035
11_133287384	11	133287384	T_C	-	single_cogn_Minus	ENSG00000183715	OPCML	protein_coding	opioid binding protein/cell adhesion molecule like	uncatalog	FLAM_C_796	REP_novel	intronic	86	525	0.140113	FALSE	FALSE	3	2	0	0	0	0	0	0.7578
11_133287385	11	133287385	T_C	-	single_cogn_Minus	ENSG00000183715	OPCML	protein_coding	opioid binding protein/cell adhesion molecule like	uncatalog	FLAM_C_796	REP_novel	intronic	55	511	0.0917345	FALSE	FALSE	3	1	0	0	0	0	0	0.8321
11_133378825	11	133378825	T_C	-	single_cogn_Minus	ENSG00000183715	OPCML	protein_coding	opioid binding protein/cell adhesion molecule like	uncatalog	AluJr_1672	ALU_novel	intronic	13	276	0.0382074	FALSE	FALSE	1	1	0	0	0	0	0	0.4115
11_133457612	11	133457612	T_C	-	single_cogn_Minus	ENSG00000183715	OPCML	protein_coding	opioid binding protein/cell adhesion molecule like	uncatalog		NONREP_novel	intronic	28	137	0.185298	FALSE	FALSE	1	1	0	0	0	0	0	0.9995
11_133518109	11	133518109	T_C	-	single_cogn_Minus	ENSG00000183715	OPCML	protein_coding	opioid binding protein/cell adhesion molecule like	uncatalog		NONREP_novel	intronic	18	106	0.16457	FALSE	FALSE			0	0	0	0	0	0.6211
11_133896552	11	133896552	T_C	-	single_cogn_Minus	ENSG00000280237	MIR4697HG	TEC	MIR4697 host gene	uncatalog		NONREP_novel		10	845	0.00645101	FALSE	FALSE			0	0	0	0	0	0.4728
21_21075142	21	21075142	A_G	+	single_cogn_Plus	ENSG00000154654	NCAM2	protein_coding	neural cell adhesion molecule 2	uncatalog		NONREP_novel	intronic	10	33	0.277273	FALSE	FALSE			0	0	0	0	0	0.6812
21_32710603	21	32710603	T_C	-	single_cogn_Minus	ENSG00000159082	SYNJ1	protein_coding	synaptojanin 1	uncatalog	FRAM_900	REP_novel	intronic	22	31	0.709677	FALSE	FALSE	2	1	0	0	0	0	0	0.0726
21_37166216	21	37166216	A_G	+	single_cogn_Plus	ENSG00000182670	TTC3	protein_coding	tetratricopeptide repeat domain 3	uncatalog		NONREP_novel	exonic	13	272	0.0395831	FALSE	FALSE			0	0	0	0	0	0.5806
1_8352517	1	8352517	T_C	-	single_cogn_Minus	ENSG00000142599	RERE	protein_coding	arginine-glutamic acid dipeptide repeats	uncatalog		NONREP_novel	three_prime_utr	28	981	0.0156836	FALSE	FALSE			0	0	0	0	0	0.4781
1_14216879	1	14216879	A_G	+	single_cogn_Plus	ENSG00000189337	KAZN	protein_coding	kazrin, periplakin interacting protein	uncatalog	AluSq2_2219	ALU_novel	intronic	10	64	0.15625	FALSE	FALSE			0	0	0	0	0	0.4512
1_14417742	1	14417742	A_G	+	single_cogn_Plus	ENSG00000189337	KAZN	protein_coding	kazrin, periplakin interacting protein	ALU	AluY_2382	ALU	intronic	12	100	0.102937	FALSE	FALSE			1	1	1	1	1	0.9078
1_14417747	1	14417747	A_G	+	single_cogn_Plus	ENSG00000189337	KAZN	protein_coding	kazrin, periplakin interacting protein	uncatalog	AluY_2382	ALU_novel	intronic	16	101	0.136243	FALSE	FALSE			0	0	0	0	0	0.2293
1_14697013	1	14697013	A_G	+	single_cogn_Plus	ENSG00000189337	KAZN	protein_coding	kazrin, periplakin interacting protein	ALU	AluJo_1687	ALU	intronic	32	279	0.100776	FALSE	FALSE	3	2	1	1	1	1	1	0.6058
1_14697035	1	14697035	A_G	+	single_cogn_Plus	ENSG00000189337	KAZN	protein_coding	kazrin, periplakin interacting protein	uncatalog	AluJo_1687	ALU_novel	intronic	25	312	0.0686875	FALSE	FALSE	3	3	0	0	0	0	0	0.5329
1_14697041	1	14697041	A_G	+	single_cogn_Plus	ENSG00000189337	KAZN	protein_coding	kazrin, periplakin interacting protein	uncatalog	AluJo_1687	ALU_novel	intronic	31	313	0.0850706	FALSE	FALSE	4	2	0	0	0	0	0	0.9996
1_14697052	1	14697052	A_G	+	single_cogn_Plus	ENSG00000189337	KAZN	protein_coding	kazrin, periplakin interacting protein	uncatalog	AluJo_1687	ALU_novel	intronic	10	332	0.0249923	FALSE	FALSE	1	1	0	0	0	0	0	0.8481
1_14697059	1	14697059	A_G	+	single_cogn_Plus	ENSG00000189337	KAZN	protein_coding	kazrin, periplakin interacting protein	uncatalog	AluJo_1687	ALU_novel	intronic	15	337	0.0353967	FALSE	FALSE	3	3	0	0	0	0	0	0.7094
1_14697060	1	14697060	A_G	+	single_cogn_Plus	ENSG00000189337	KAZN	protein_coding	kazrin, periplakin interacting protein	ALU	AluJo_1687	ALU	intronic	28	332	0.0699966	FALSE	FALSE	2	2	1	1	1	1	1	0.6936
1_14697082	1	14697082	A_G	+	single_cogn_Plus	ENSG00000189337	KAZN	protein_coding	kazrin, periplakin interacting protein	ALU	AluJo_1687	ALU	intronic	33	338	0.0897003	FALSE	FALSE	2	2	1	1	1	1	1	0.9676
1_14711072	1	14711072	A_G	+	single_cogn_Plus	ENSG00000189337	KAZN	protein_coding	kazrin, periplakin interacting protein	ALU	AluJr_1855	ALU	intronic	11	48	0.229167	FALSE	FALSE	8	4	1	1	1	0	0	0.9429
1_14711176	1	14711176	A_G	+	single_cogn_Plus	ENSG00000189337	KAZN	protein_coding	kazrin, periplakin interacting protein	ALU	AluJr_1855	ALU	intronic	16	100	0.148528	FALSE	FALSE	10	4	1	1	1	0	0	0.2236
1_14711251	1	14711251	A_G	+	single_cogn_Plus	ENSG00000189337	KAZN	protein_coding	kazrin, periplakin interacting protein	REP	FLAM_A_927	REP	intronic	13	172	0.0683955	FALSE	FALSE	3	2	1	1	1	0	0	0.9972
1_14711274	1	14711274	A_G	+	single_cogn_Plus	ENSG00000189337	KAZN	protein_coding	kazrin, periplakin interacting protein	REP	FLAM_A_927	REP	intronic	14	177	0.067179	FALSE	FALSE	3	2	1	1	1	0	0	0.7115
1_14754984	1	14754984	A_G	+	single_cogn_Plus	ENSG00000189337	KAZN	protein_coding	kazrin, periplakin interacting protein	ALU	AluJb_1905	ALU	intronic	21	221	0.0775794	FALSE	FALSE			1	1	1	0	0	0.5509
1_14755001	1	14755001	A_G	+	single_cogn_Plus	ENSG00000189337	KAZN	protein_coding	kazrin, periplakin interacting protein	ALU	AluJb_1905	ALU	intronic	19	243	0.0614907	FALSE	FALSE	1	1	1	1	1	0	0	0.1049
1_14755008	1	14755008	A_G	+	single_cogn_Plus	ENSG00000189337	KAZN	protein_coding	kazrin, periplakin interacting protein	uncatalog	AluJb_1905	ALU_novel	intronic	31	240	0.118644	FALSE	FALSE	2	2	0	0	0	0	0	0.9496
1_14755009	1	14755009	A_G	+	single_cogn_Plus	ENSG00000189337	KAZN	protein_coding	kazrin, periplakin interacting protein	ALU	AluJb_1905	ALU	intronic	34	239	0.117711	FALSE	FALSE	1	1	1	1	1	0	0	0.3523
1_14755032	1	14755032	A_G	+	single_cogn_Plus	ENSG00000189337	KAZN	protein_coding	kazrin, periplakin interacting protein	ALU	AluJb_1905	ALU	intronic	36	256	0.120881	FALSE	FALSE	1	1	1	1	1	0	0	0.0343
1_20483704	1	20483704	T_C	-	single_cogn_Minus	ENSG00000162545	CAMK2N1	protein_coding	calcium/calmodulin dependent protein kinase II inhibitor 1	uncatalog		NONREP_novel	exonic	28	565	0.0320773	FALSE	FALSE			0	0	0	0	0	0.0897
1_20909860	1	20909860	T_C	-	single_cogn_Minus	ENSG00000075151	EIF4G3	protein_coding	eukaryotic translation initiation factor 4 gamma 3	ALU	AluJo_1947	ALU	intronic	14	70	0.187143	FALSE	FALSE	3	1	1	1	0	0	0	0.3544
1_21157434	1	21157434	T_C	-	single_cogn_Minus	ENSG00000075151	EIF4G3	protein_coding	eukaryotic translation initiation factor 4 gamma 3	ALU	AluJb_1479	ALU	intronic	14	101	0.11586	FALSE	FALSE			1	1	0	0	0	0.9295
1_29173252	1	29173252	T_C	-	single_cogn_Minus	ENSG00000116350	SRSF4	protein_coding	serine and arginine rich splicing factor 4	ALU	AluY_2277	ALU	exonic	26	128	0.108075	FALSE	FALSE			1	1	1	1	1	0.386
1_29173276	1	29173276	T_C	-	single_cogn_Minus	ENSG00000116350	SRSF4	protein_coding	serine and arginine rich splicing factor 4	ALU	AluY_2277	ALU	exonic	17	87	0.194797	FALSE	FALSE			1	1	1	1	0	0.9041
1_29173302	1	29173302	T_C	-	single_cogn_Minus	ENSG00000116350	SRSF4	protein_coding	serine and arginine rich splicing factor 4	ALU	AluY_2277	ALU	exonic	15	78	0.189744	FALSE	FALSE			1	1	1	0	0	0.6273
1_32143301	1	32143301	A_G	+	single_cogn_Plus	ENSG00000025800	KPNA6	protein_coding	karyopherin subunit alpha 6	ALU	AluJb_1596	ALU	intronic	30	37	0.810811	FALSE	FALSE			1	1	1	0	0	0.6646
1_32143327	1	32143327	A_G	+	single_cogn_Plus	ENSG00000025800	KPNA6	protein_coding	karyopherin subunit alpha 6	ALU	AluJb_1596	ALU	intronic	17	38	0.447368	FALSE	FALSE			1	1	0	0	0	0.9997
1_32143328	1	32143328	A_G	+	single_cogn_Plus	ENSG00000025800	KPNA6	protein_coding	karyopherin subunit alpha 6	ALU	AluJb_1596	ALU	intronic	37	38	0.97076	FALSE	FALSE			1	1	1	1	0	0.9997
1_32143464	1	32143464	A_G	+	single_cogn_Plus	ENSG00000025800	KPNA6	protein_coding	karyopherin subunit alpha 6	ALU	AluSx1_1532	ALU	intronic	39	54	0.722222	FALSE	FALSE	1	1	1	1	1	1	0	0.9682
1_32143488	1	32143488	A_G	+	single_cogn_Plus	ENSG00000025800	KPNA6	protein_coding	karyopherin subunit alpha 6	uncatalog	AluSx1_1532	ALU_novel	intronic	10	54	0.185185	FALSE	FALSE			0	0	0	0	0	0.1897
1_37014960	1	37014960	T_C	-	single_cogn_Minus	ENSG00000163873	GRIK3	protein_coding	glutamate ionotropic receptor kainate type subunit 3	uncatalog		NONREP_novel	intronic	10	306	0.0117152	FALSE	FALSE			0	0	0	0	0	0.4285
1_39190477	1	39190477	A_G	+	single_cogn_Plus	ENSG00000127603	MACF1	protein_coding	microtubule-actin crosslinking factor 1	ALU	AluJb_1062	ALU	intronic	20	42	0.47619	FALSE	FALSE	1	1	1	0	0	0	0	0.347
1_39190495	1	39190495	A_G	+	single_cogn_Plus	ENSG00000127603	MACF1	protein_coding	microtubule-actin crosslinking factor 1	ALU	AluJb_1062	ALU	intronic	21	29	0.724138	FALSE	FALSE	3	1	1	0	0	0	0	0.5019
1_39190499	1	39190499	A_G	+	single_cogn_Plus	ENSG00000127603	MACF1	protein_coding	microtubule-actin crosslinking factor 1	ALU	AluJb_1062	ALU	intronic	17	29	0.586207	FALSE	FALSE	2	1	1	0	0	0	0	0.9994
1_44778636	1	44778636	A_G	+	single_cogn_Plus	ENSG00000142937	RPS8	protein_coding	ribosomal protein S8	uncatalog		NONREP_novel	exonic	10	501	0.0161067	FALSE	FALSE	1	1	0	0	0	0	0	0.6216
1_47047965	1	47047965	A_G	+	single_cogn_Plus	ENSG00000186377	CYP4X1	protein_coding	cytochrome P450 family 4 subfamily X member 1	ALU	AluJr4_1647	ALU	intronic	13	55	0.236364	FALSE	FALSE	1	1	1	1	1	1	1	0.2493
1_47047969	1	47047969	A_G	+	single_cogn_Plus	ENSG00000186377	CYP4X1	protein_coding	cytochrome P450 family 4 subfamily X member 1	ALU	AluJr4_1647	ALU	intronic	11	57	0.192982	FALSE	FALSE	1	1	1	1	1	1	1	0.673
1_47048009	1	47048009	A_G	+	single_cogn_Plus	ENSG00000186377	CYP4X1	protein_coding	cytochrome P450 family 4 subfamily X member 1	ALU	AluJr4_1647	ALU	intronic	16	79	0.202532	FALSE	FALSE	1	1	1	1	1	1	1	0.8007
1_47048010	1	47048010	A_G	+	single_cogn_Plus	ENSG00000186377	CYP4X1	protein_coding	cytochrome P450 family 4 subfamily X member 1	ALU	AluJr4_1647	ALU	intronic	11	78	0.141026	FALSE	FALSE			1	1	1	1	1	0.595
1_47048018	1	47048018	A_G	+	single_cogn_Plus	ENSG00000186377	CYP4X1	protein_coding	cytochrome P450 family 4 subfamily X member 1	ALU	AluJr4_1647	ALU	intronic	51	79	0.64557	FALSE	FALSE	3	2	1	1	1	1	1	0.0411
1_47048029	1	47048029	A_G	+	single_cogn_Plus	ENSG00000186377	CYP4X1	protein_coding	cytochrome P450 family 4 subfamily X member 1	ALU	AluJr4_1647	ALU	intronic	26	86	0.302326	FALSE	FALSE	1	1	1	1	1	1	1	0.9152
1_47048033	1	47048033	A_G	+	single_cogn_Plus	ENSG00000186377	CYP4X1	protein_coding	cytochrome P450 family 4 subfamily X member 1	ALU	AluJr4_1647	ALU	intronic	12	77	0.155844	FALSE	FALSE			1	1	1	1	1	0.9624
1_47048047	1	47048047	A_G	+	single_cogn_Plus	ENSG00000186377	CYP4X1	protein_coding	cytochrome P450 family 4 subfamily X member 1	ALU	AluJr4_1647	ALU	intronic	14	59	0.237288	FALSE	FALSE	2	2	1	1	1	1	1	0.7903
1_47048061	1	47048061	A_G	+	single_cogn_Plus	ENSG00000186377	CYP4X1	protein_coding	cytochrome P450 family 4 subfamily X member 1	ALU	AluJr4_1647	ALU	intronic	15	44	0.340909	FALSE	FALSE	2	2	1	1	1	1	1	0.1151
1_51272490	1	51272490	A_G	+	single_cogn_Plus	ENSG00000123091	RNF11	protein_coding	ring finger protein 11	uncatalog		NONREP_novel	three_prime_utr	15	274	0.031127	FALSE	FALSE	4	3	0	0	0	0	0	0.2461
[truncated: 45,897 more rows]

## Sheet: Table S4
Site_ID	gene_name	REDIportal_context	Consequence_VEP	Amino_acids_VEP	uniP_domain_Start	uniP_domain_End	uniP_entry	evidence	domain_length	UniProt_domain	Nishikura_2016_protein	ADARmember	Function
[truncated: 323 more rows]

[truncated: 5 more sheets: Table S5, Table S6, Table S7, Table S8, Table S9]
